# Supplementary material for: Structural revision of a Wnt/β-catenin modulator and confirmation of cannabielsoin constitution and configuration
Source: Royal Society of Chemistry journal article supplement (doi:10.1039/d1cc01971f), 2021-01-01
Supplement: d1cc01971f1.pdf [file d1cc01971f1.pdf]

## Supporting Information

### Structural Revision of a Wnt/ $\beta$ -catenin Modulator and Confirmation of Cannabielsoin Constitution and Configuration

Angelina Z. Monroe,<sup>a</sup> William H. Gordon,<sup>a</sup> Jared S. Wood,<sup>a</sup> Gary E. Martin,<sup>b</sup> Jeremy B. Morgan,<sup>a\*</sup> R. Thomas Williamson<sup>a\*</sup>

a. Department of Chemistry & Biochemistry, University of North Carolina Wilmington, Wilmington, North Carolina 28409, United States

b. Department of Chemistry, Seton Hall University, South Orange, New Jersey, 07079, United States

\*E-mail: [williamsonr@uncw.edu](mailto:williamsonr@uncw.edu) and [morganj@uncw.edu](mailto:morganj@uncw.edu)

#### Table of Contents

|                                                                                                                                                                                  |     |
|----------------------------------------------------------------------------------------------------------------------------------------------------------------------------------|-----|
| 1. General Experimental Details.                                                                                                                                                 | S5  |
| 2. Experimental for synthesis of CBE ( <b>7</b> ) using Oxone™ conditions described in reference 1 and alternate synthesis of CBE ( <b>7</b> ) from CBD diacetate ( <b>10</b> ). | S6  |
| 3. Graph of US Patents related to CBE by year.                                                                                                                                   | S7  |
| 4. General Experimental Details for NMR spectroscopy data acquired in this work.                                                                                                 | S8  |
| 5. 1D <sup>1</sup> H NMR data (600.1 MHz) for CBE ( <b>7</b> ) in CDCl <sub>3</sub> .                                                                                            | S9  |
| 6. 1D <sup>13</sup> C NMR data (150.9 MHz) for CBE ( <b>7</b> ) in CDCl <sub>3</sub> .                                                                                           | S10 |
| 7. <sup>1</sup> H- <sup>1</sup> H COSY data for CBE ( <b>7</b> ).                                                                                                                | S11 |
| 8. <sup>1</sup> H- <sup>13</sup> C Multiplicity-edited HSQC data for CBE ( <b>7</b> ).                                                                                           | S12 |
| 9. 8 Hz Optimized <sup>1</sup> H- <sup>13</sup> C HMBC data for CBE ( <b>7</b> ).                                                                                                | S13 |
| 10. 3 Hz Optimized <sup>1</sup> H- <sup>13</sup> C HMBC data for CBE ( <b>7</b> ).                                                                                               | S14 |
| 11. <sup>1</sup> H- <sup>1</sup> H ROESY data (600.1 MHz, 300 ms) for CBE ( <b>7</b> ).                                                                                          | S15 |

|                                                                                                                                                                                                                                         |     |
|-----------------------------------------------------------------------------------------------------------------------------------------------------------------------------------------------------------------------------------------|-----|
| 12. Table of NMR assignments for CBE ( <b>7</b> ).                                                                                                                                                                                      | S16 |
| 13. Summary of stereochemical assignment reported in reference 3.                                                                                                                                                                       | S17 |
| 14. Comparison of actual CBE ( <b>7</b> ) NMR chemical shifts to those reported for the Oxone™ oxidation in reference 1.                                                                                                                | S19 |
| 15. Structures of 1 <i>R</i> ,2 <i>S</i> -CBD epoxide ( <b>5</b> ), CBE ( <b>7</b> ), CBE with an alternate configuration at C1 ( <b>8</b> ) and the 6-membered cyclic ether analog ( <b>9</b> ).                                       | S20 |
| 16. Experimental for ( <b>5</b> ), ( <b>7</b> ), ( <b>8</b> ), and ( <b>9</b> ) conformer search and DFT calculation of NMR parameters.                                                                                                 | S21 |
| 17. Conformations of ( <b>5</b> ) used for calculation of NMR parameters.                                                                                                                                                               | S22 |
| 18. Conformations of ( <b>7</b> ) used for calculation of NMR parameters.                                                                                                                                                               | S24 |
| 19. Conformations of ( <b>8</b> ) used for calculation of NMR parameters.                                                                                                                                                               | S27 |
| 20. Conformations of ( <b>9</b> ) used for calculation of NMR parameters.                                                                                                                                                               | S30 |
| 21. Comparison of ROESY analysis for ( <b>7</b> ) and ( <b>8</b> ).                                                                                                                                                                     | S32 |
| 22. Table of calculated <sup>13</sup> C chemical shifts for ( <b>5</b> ), ( <b>7</b> ), ( <b>8</b> ), and ( <b>9</b> ) from calculations performed at the mPW1PW91/6-311+G(2d,p)//M06-2X-D3/6-31G(d,p) level.                           | S33 |
| 23. Graph of calculated experimental <sup>13</sup> C chemical shifts (ppm) for ( <b>5</b> ), ( <b>7</b> ), ( <b>8</b> ), and ( <b>9</b> ) from calculations performed at the mPW1PW91/6-311+G(2d,p)//M06-2X-D3/6-31G(d,p) level.        | S34 |
| 24. Experimental for RCSA sample preparation and analysis for CBE ( <b>7</b> ).                                                                                                                                                         | S35 |
| 25. Certificates of analysis for PBLG used in this study.                                                                                                                                                                               | S36 |
| 26. 1D <sup>2</sup> H NMR (92.1 MHz) of CBE ( <b>7</b> ) and PBLG in CDCl <sub>3</sub> .                                                                                                                                                | S37 |
| 27. 1D <sup>13</sup> C NMR data (150.9 MHz) for biphasic isotropic/anisotropic CBE ( <b>7</b> ) in PBLG/ CDCl <sub>3</sub> . Top spectrum: Normal processing parameters. Bottom spectrum: Processed with Global Spectral deconvolution. | S38 |
| 28. Atom numbering key for DFT and SVD calculations.                                                                                                                                                                                    | S39 |

|                                                                                                                                                                                          |     |
|------------------------------------------------------------------------------------------------------------------------------------------------------------------------------------------|-----|
| 29. MSPIN input files for (5) (all carbons). Values recorded as zero arise from unresolved NMR resonances that obviate the measurement of these small differences in NMR chemical shift. | S40 |
| 30. MSPIN input files for (7) (all carbons). Values recorded as zero arise from unresolved NMR resonances that obviate the measurement of these small differences in NMR chemical shift. | S41 |
| 31. MSPIN input files for (8) (all carbons). Values recorded as zero arise from unresolved NMR resonances that obviate the measurement of these small differences in NMR chemical shift. | S42 |
| 32. MSPIN input files for (9) (all carbons). Values recorded as zero arise from unresolved NMR resonances that obviate the measurement of these small differences in NMR chemical shift. | S43 |
| 33. MSPIN output files for (5) using all carbons in the SVD analysis.                                                                                                                    | S44 |
| 34. MSPIN output files for (7) using all carbons in the SVD analysis.                                                                                                                    | S51 |
| 35. MSPIN output files for (8) using all carbons in the SVD analysis.                                                                                                                    | S58 |
| 36. MSPIN output files for (9) using all carbons in the SVD analysis.                                                                                                                    | S65 |
| 37. Table and bar graph of Q-factor determined from SVD for structures (5), (7), (8), and (9).                                                                                           | S71 |
| 38. Experimental for synthesis of 1 <i>R</i> ,2 <i>S</i> -CBD epoxide (5).                                                                                                               | S72 |
| 39. 1D <sup>1</sup> H NMR data (600.1 MHz) for 1 <i>R</i> ,2 <i>S</i> -CBD epoxide (5) in CDCl <sub>3</sub> .                                                                            | S73 |
| 40. 1D <sup>13</sup> C NMR data (150.9 MHz) for 1 <i>R</i> ,2 <i>S</i> -CBD epoxide (5) in CDCl <sub>3</sub> .                                                                           | S74 |
| 41. <sup>1</sup> H- <sup>1</sup> H COSY data for 1 <i>R</i> ,2 <i>S</i> -CBD epoxide (5).                                                                                                | S75 |
| 42. <sup>1</sup> H- <sup>13</sup> C Multiplicity-edited HSQC data for 1 <i>R</i> ,2 <i>S</i> -CBD epoxide (5).                                                                           | S76 |
| 43. 8 Hz Optimized <sup>1</sup> H- <sup>13</sup> C HMBC data for 1 <i>R</i> ,2 <i>S</i> -CBD epoxide (5).<br>S76                                                                         | S77 |
| 44. <sup>1</sup> H- <sup>1</sup> H ROESY data (600.1 MHz, 300 ms) for 1 <i>R</i> ,2 <i>S</i> -CBD epoxide (5).                                                                           | S78 |
| 45. Table of NMR assignments for 1 <i>R</i> ,2 <i>S</i> -CBD epoxide (5).                                                                                                                | S79 |

|                                                                                                                                    |     |
|------------------------------------------------------------------------------------------------------------------------------------|-----|
| 46. Experimental for synthesis of 1 <i>S</i> ,2 <i>R</i> -CBD epoxide diacetate ( <b>11</b> ).                                     | S80 |
| 47. 1D <sup>1</sup> H NMR data (600.1 MHz) for 1 <i>S</i> ,2 <i>R</i> -CBD epoxide diacetate ( <b>11</b> ) in CDCl <sub>3</sub> .  | S81 |
| 48. 1D <sup>13</sup> C NMR data (150.9 MHz) for 1 <i>S</i> ,2 <i>R</i> -CBD epoxide diacetate ( <b>11</b> ) in CDCl <sub>3</sub> . | S82 |
| 49. <sup>1</sup> H- <sup>1</sup> H COSY data for 1 <i>S</i> ,2 <i>R</i> -CBD epoxide diacetate ( <b>11</b> ).                      | S83 |
| 50. <sup>1</sup> H- <sup>13</sup> C Multiplicity-edited HSQC data for 1 <i>S</i> ,2 <i>R</i> -CBD diacetate ( <b>11</b> ).         | S84 |
| 51. 8 Hz Optimized <sup>1</sup> H- <sup>13</sup> C HMBC data for 1 <i>S</i> ,2 <i>R</i> -CBD epoxide diacetate ( <b>11</b> ).      | S85 |
| 52. <sup>1</sup> H- <sup>1</sup> H ROESY data (600.1 MHz, 300 ms) for 1 <i>S</i> ,2 <i>R</i> -CBD epoxide diacetate ( <b>11</b> ). | S86 |
| 53. Table of NMR assignments for 1 <i>S</i> ,2 <i>R</i> -CBD epoxide diacetate ( <b>11</b> ).                                      | S87 |
| 54. Improved synthesis of CBE ( <b>7</b> ) from CBD ( <b>2</b> ).                                                                  | S88 |
| 55. References.                                                                                                                    | S89 |

## 1. General Experimental Details.

Liquid chromatography was performed using a CombiFlash™ NextGen 300+ instrument for forced flow (flash chromatography) on silica gel cartridges (RediSep™ Rf) purchased from Teledyne Isco. Thin layer chromatography (TLC) was performed on EMD Chemicals 0.25 mm silica gel 60 plates. Visualization was achieved using UV light (254 nm) or basic potassium permanganate in water followed by heating. All reactions were conducted in oven or flame-dried glassware under an inert atmosphere of argon. Solvents were used as fresh ACS grade or Acros anhydrous over 4Å molecular sieves. Cannabidiol (~85% CBD) was donated by PureElix, Inc. and purified to >95% purity via silica gel chromatography.

2. Experimental for synthesis of CBE (**7**) using Oxone™ conditions described in reference 1 and alternate synthesis of CBE (**7**) from CBD diacetate (**10**).

#### CBE (**7**) from Oxone™.

A dry 2-dram vial was charged with 62.9 mg (0.2 mmol) of cannabidiol (**2**, >95% CBD) and a Teflon stir bar. Acetone (0.6 mL) was added, followed by 184 mg (0.6 mmol) of Oxone™. The reaction was stirred for 48 hours under argon. TLC indicated that some CBD remained even after this time frame. The suspension was filtered with additional acetone wash, and the resulting solution was concentrated to dryness. The mixture was purified by silica gel chromatography ramping from 0-40% ethyl acetate in hexanes over 10 minutes to give 16.0 mg (24% yield) of cannabielsoin (**7**, CBE) as a yellow film. HRMS–ESI (m/z): [M]<sup>+</sup> calculated for C<sub>21</sub>H<sub>31</sub>O<sub>2</sub>, 331.2273; found, 331.2265 (-2.4 ppm).

#### CBD diacetate (**10**).

A flame-dried 50 mL round bottom equipped with a Teflon stir bar was charged with 1.57 g of cannabidiol (**2**, ~85% CBD). Pyridine (5 mL) and acetic anhydride (5 mL) were added, and the solution was stirred under argon at room temperature for 48 hours. (Note: the product and starting material coelute on TLC in hexanes/ethyl acetate but separate in hexanes/acetone). The reaction mixture was transferred to a separatory funnel with 100 mL of MTBE. The solution was sequentially washed 2 x 50 mL of 1 M HCl, 25 mL of sat. NaHCO<sub>3</sub>, and 25 mL of brine. After drying over MgSO<sub>4</sub>, the suspension was filtered and concentrated. The crude oil was purified by silica gel chromatography ramping from 0-10% acetone in hexanes over 10 minutes to give 1.21 g (66% yield) of CBD diacetate (**10**) as a clear oil. NMR spectral data was consistent with a published report.<sup>2</sup>

#### CBE (**7**) from CBD diacetate (**10**).

A dry 2-dram vial was charged with 39.8 mg (0.1 mmol) of CBD diacetate (**10**) and a Teflon stir bar. Potassium bicarbonate (30.0 mg, 0.3 mmol) was added, followed by 0.4 mL of ethanol to form a suspension under argon. Benzonitrile (31 μL, 0.3 mmol) and 30% hydrogen peroxide (30 μL, 0.3 mmol) were added sequentially by syringe. The reaction was stirred for 40 hours under argon. After this time, multiple spots were observed by TLC, including CBE. An aqueous solution of 1M NaOH 0.5 mL was added and stirring was continued for 1 hour. The suspension had turned a deep purple color that dissipated upon quenching with 1 mL of 2M HCl. The aqueous mixture was extracted with 2 x 2 mL of ethyl acetate. The combined organic layer was washed with 2 mL saturated NaHCO<sub>3</sub>, dried over MgSO<sub>4</sub>, filtered, and concentrated. The mixture was purified by silica gel chromatography ramping from 0-25% ethyl acetate in hexanes over 10 minutes to give 19.4 mg (59% yield) of CBE (**7**) as a clear film.

3. Graph of US Patents related to CBE by year.

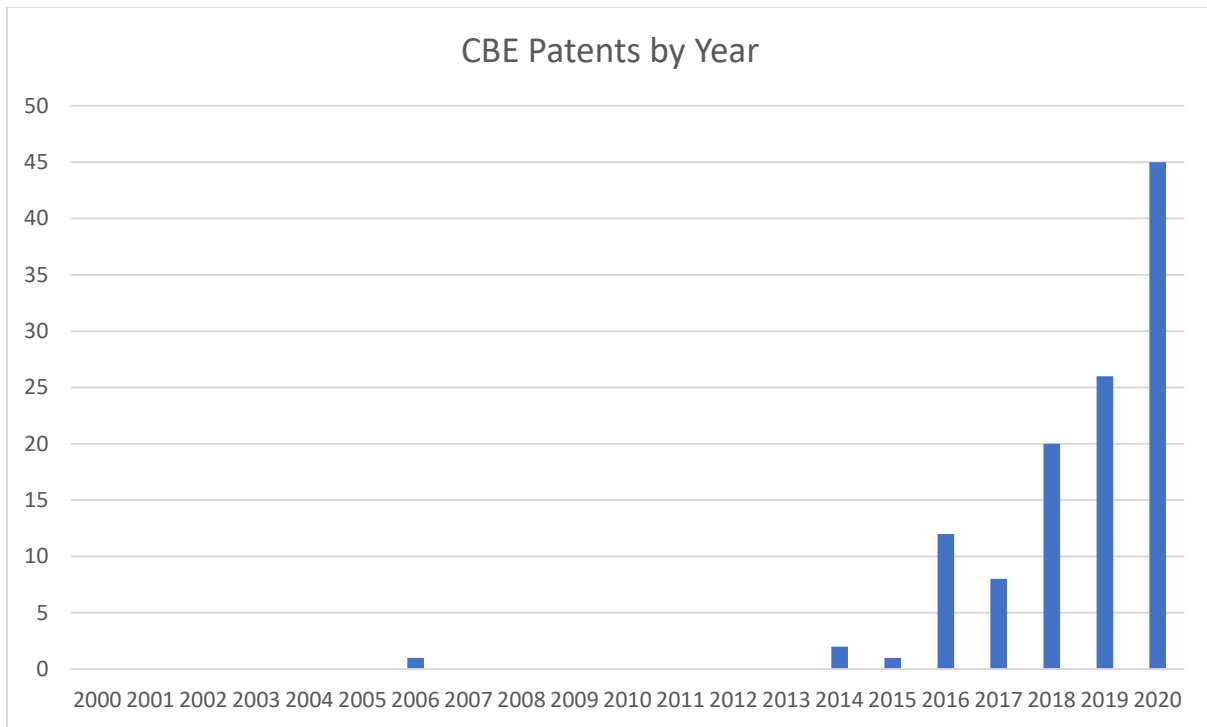

#### 4. General Experimental Details for NMR spectroscopy acquired in this work.

NMR data were acquired on a 600 MHz Bruker AVANCE III spectrometer with a 5 mm BBFO probe. NMR chemical shifts were reported in ppm and referenced to residual solvent peaks ( $^1\text{H}$  and  $^{13}\text{C}$  NMR in  $\text{CDCl}_3$  were referenced to 7.26 ppm and 77.0 ppm, respectively).



5. 1D  $^1\text{H}$  NMR data (600.1 MHz) for CBE (**7**) in  $\text{CDCl}_3$

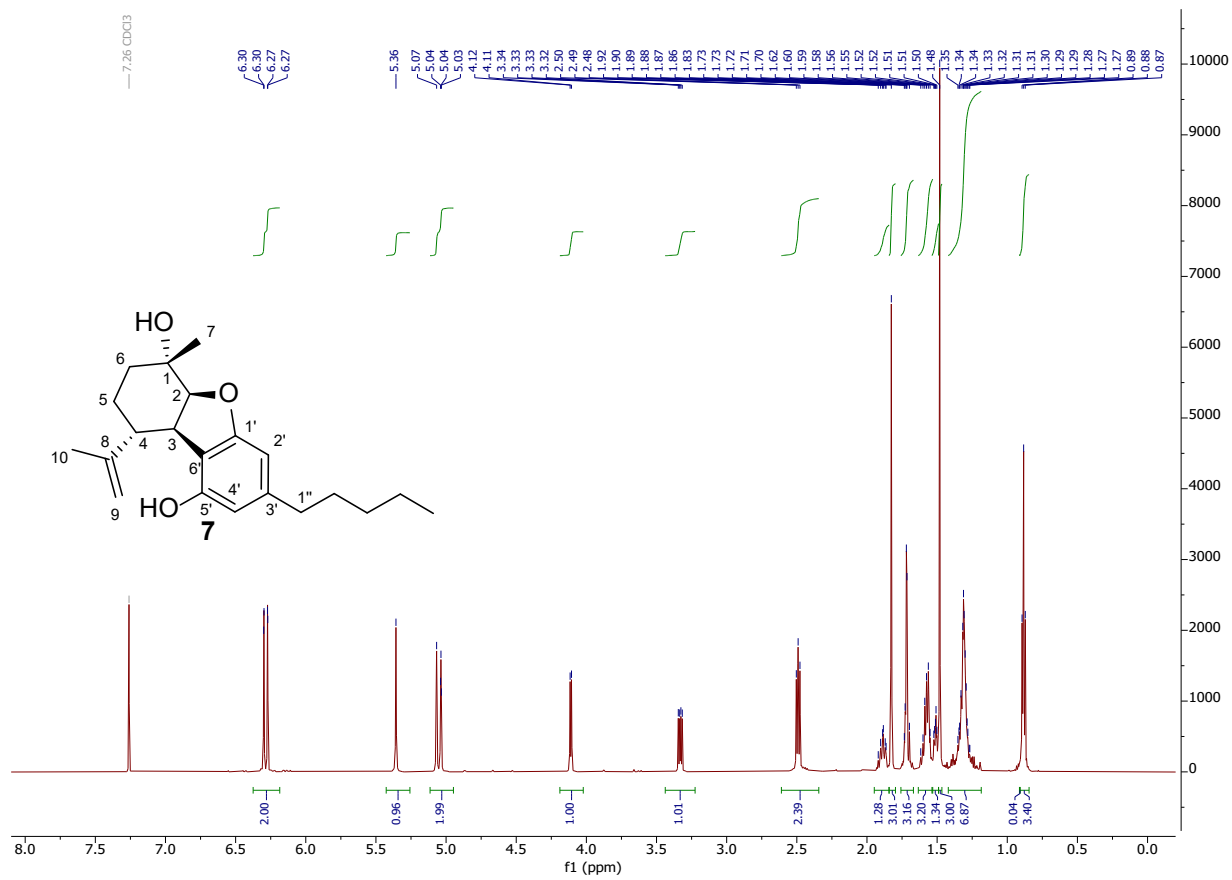

6. 1D <sup>13</sup>C NMR data (150.9 MHz) for CBE (**7**) in CDCl<sub>3</sub>.

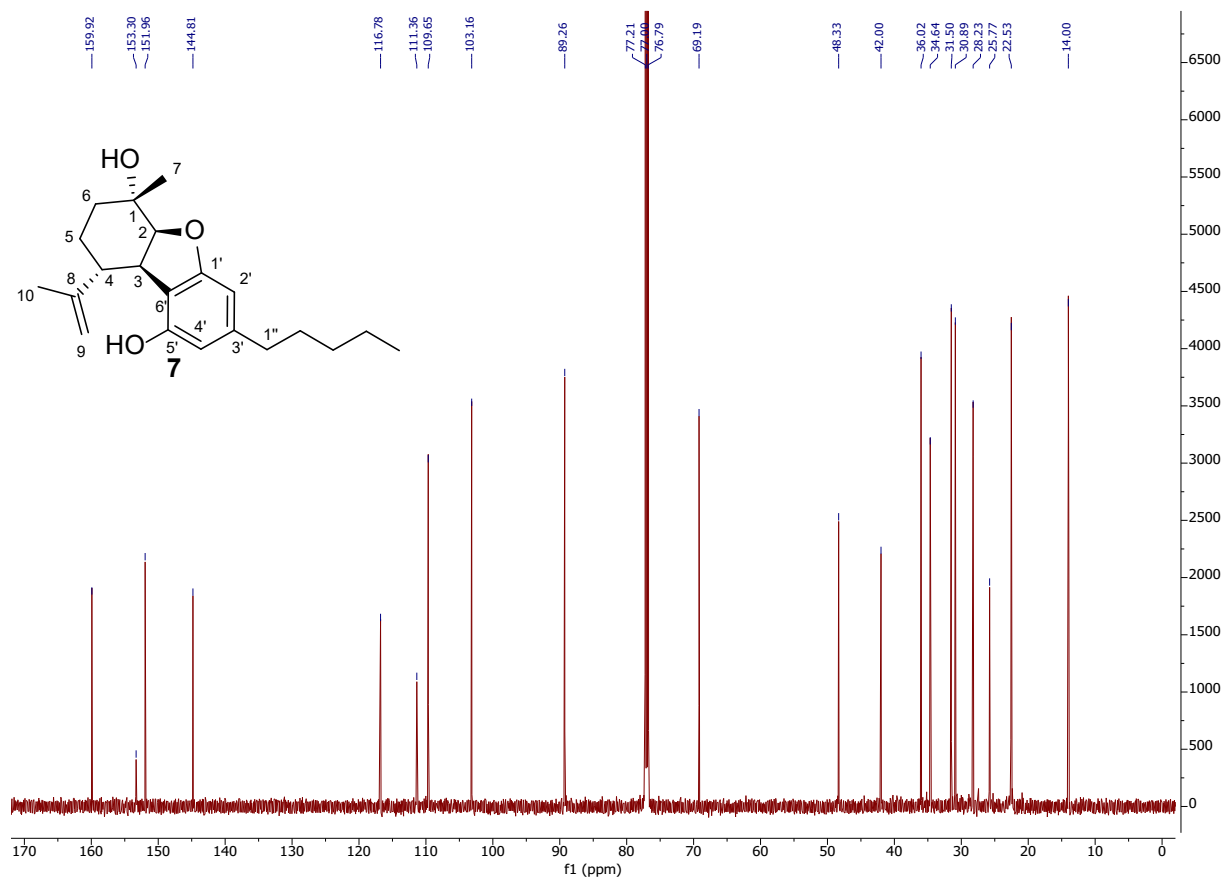

7.  $^1\text{H}$ - $^1\text{H}$  COSY data (600.1 MHz) for CBE (**7**).

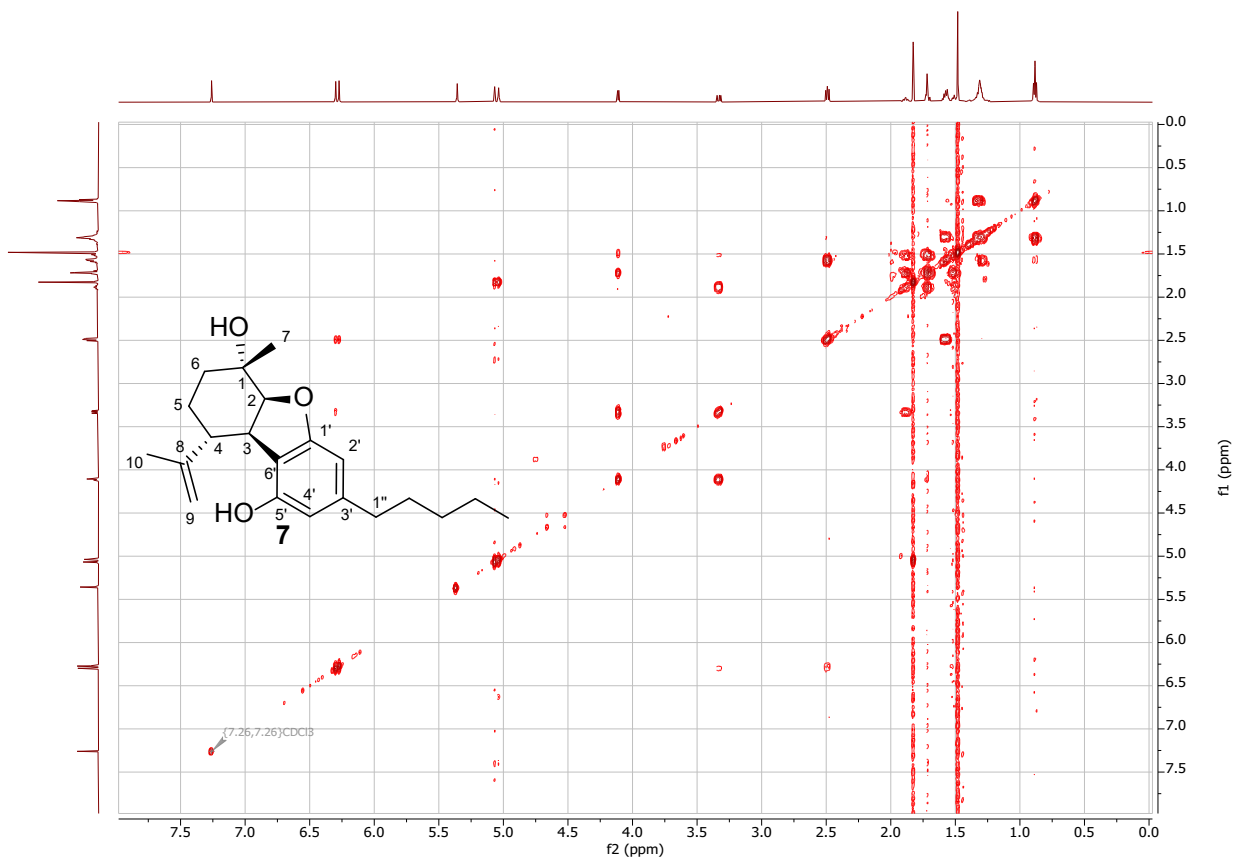

8.  $^1\text{H}$ - $^{13}\text{C}$  Multiplicity-edited HSQC (600.1 MHz) data for CBE (7).

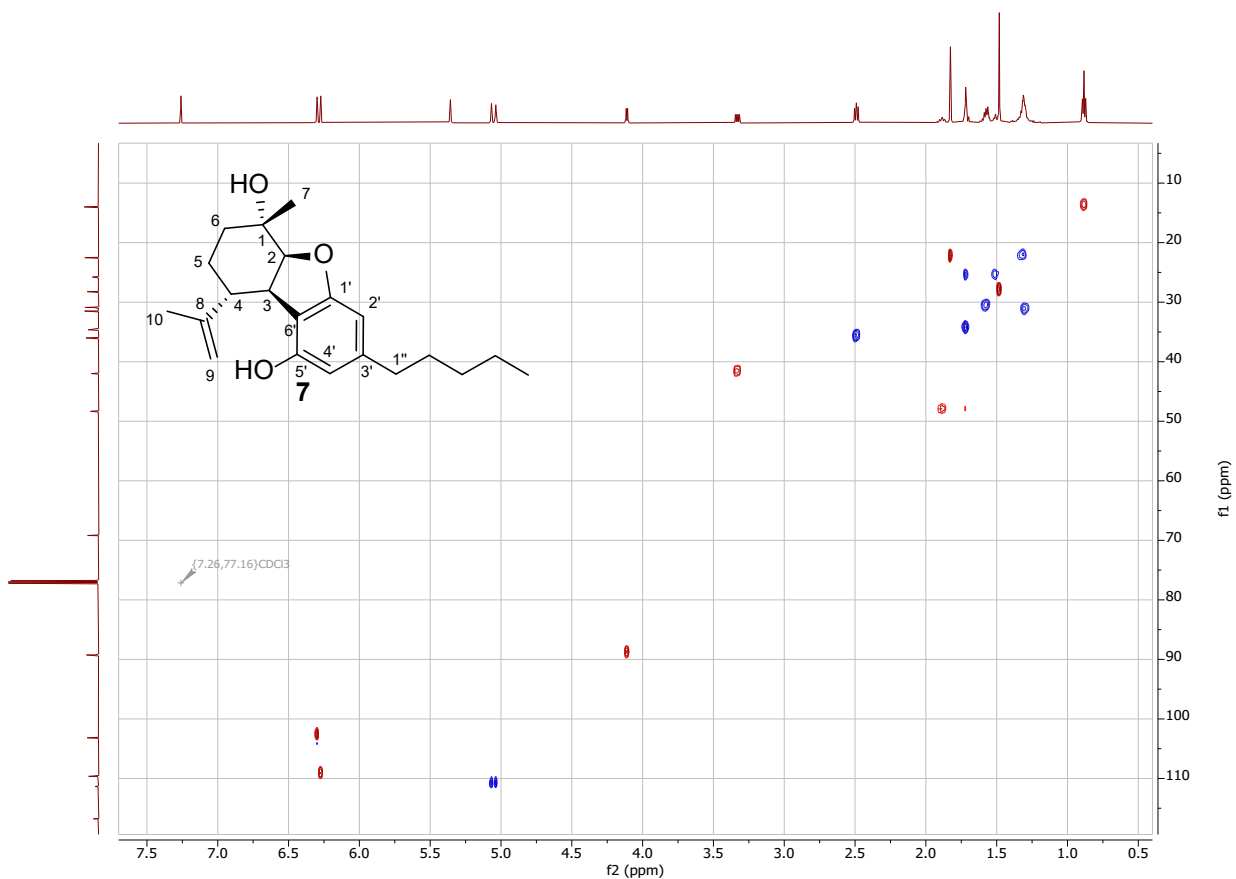

9. 8 Hz Optimized  $^1\text{H}$ - $^{13}\text{C}$  HMBC data (600.1 MHz) for CBE (7).

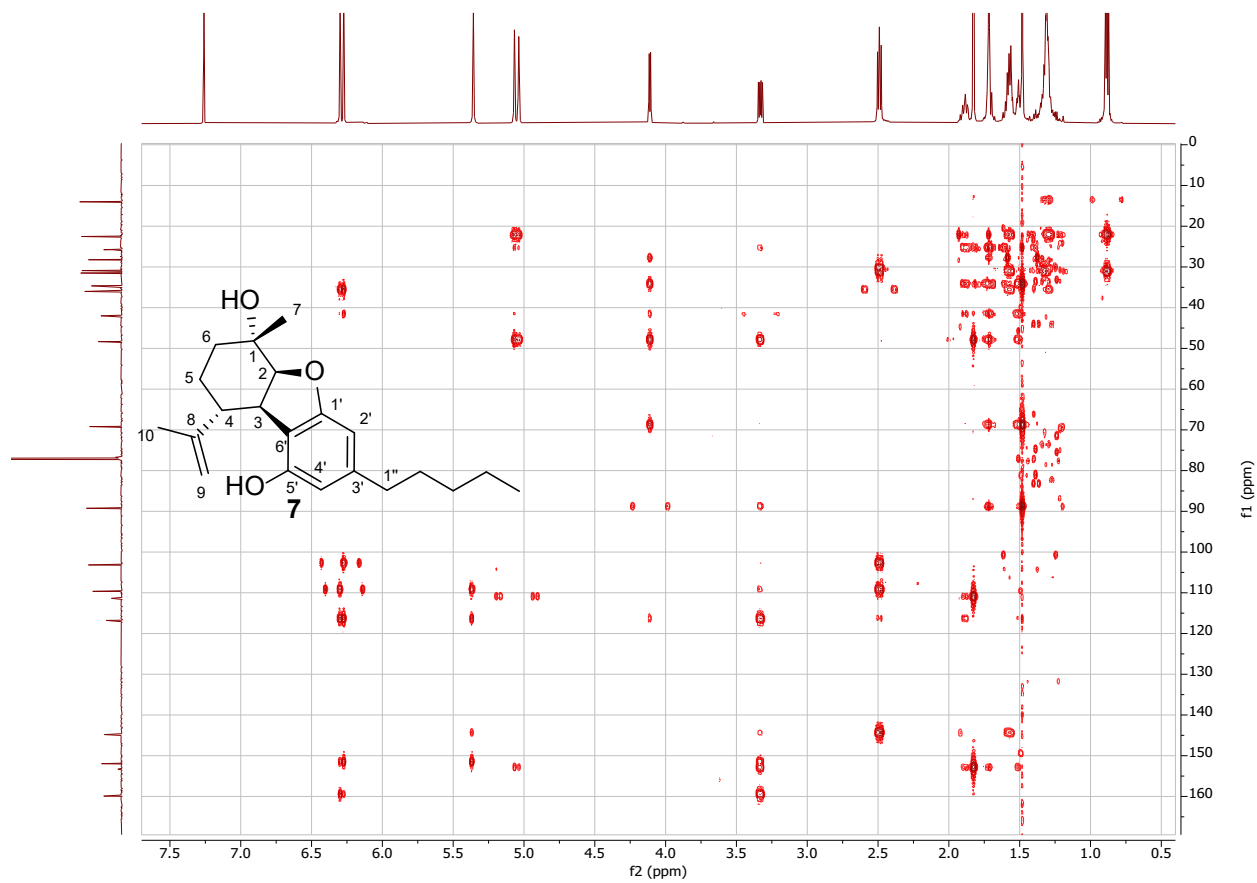

10. 3 Hz Optimized  $^1\text{H}$ - $^{13}\text{C}$  HMBC data (600.1 MHz) for CBE (7).

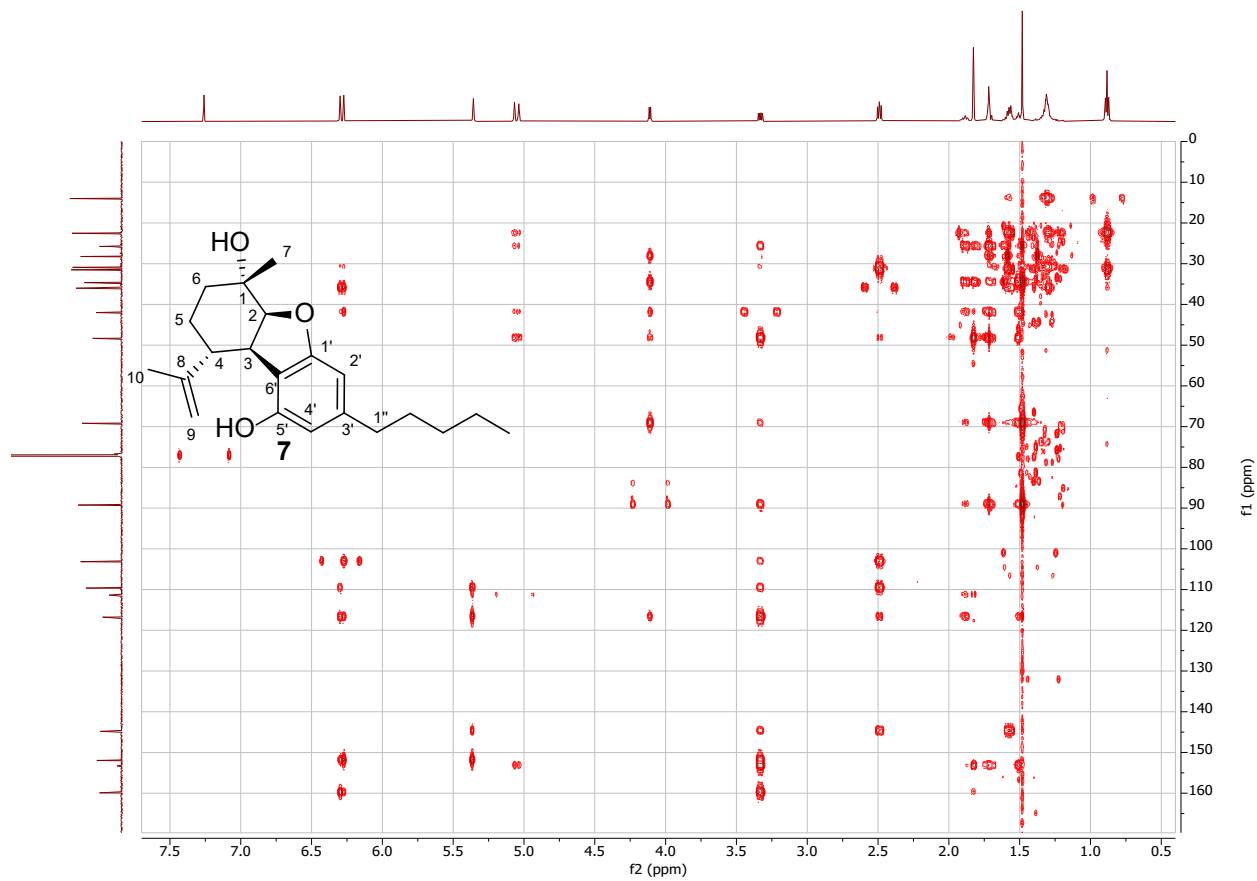

11.  $^1\text{H}$ - $^1\text{H}$  ROESY data (600.1 MHz, 300 ms) for CBE (7).

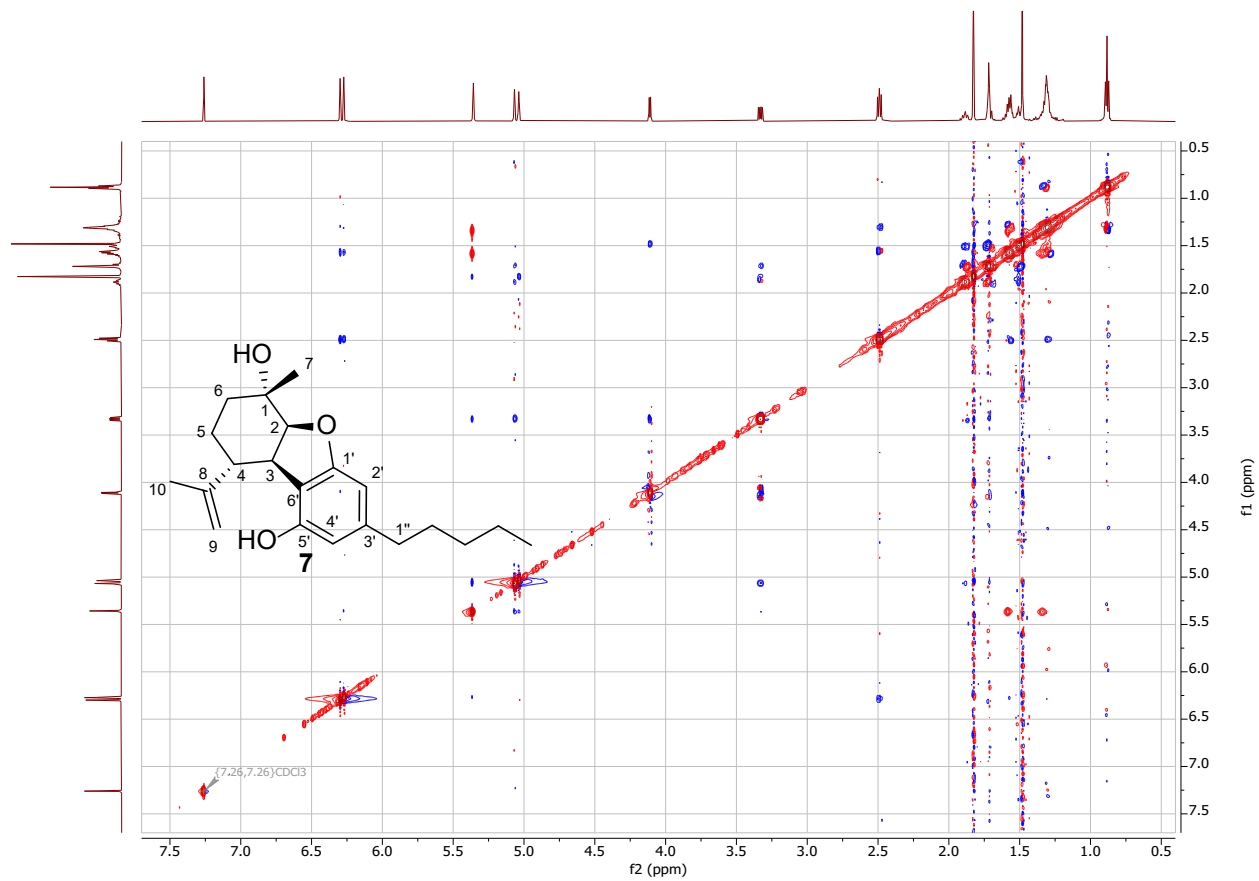

12. Table of NMR assignments for CBE (7).

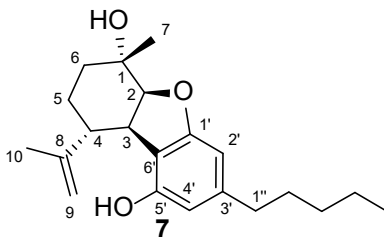

| Carbon # | <sup>1</sup> H δ, ppm, multiplicity (Hz) | <sup>13</sup> C δ, multiplicity | HMBC Correlations                                            |
|----------|------------------------------------------|---------------------------------|--------------------------------------------------------------|
| 1        |                                          | 69.3 C                          |                                                              |
| 2        | 4.11 d (5.9)                             | 89.3 CH                         | C1, C3, C4, C6, C7, C1', (C1 in 3 Hz HMBC)                   |
| 3        | 3.33, dd (11.1, 5.9)                     | 42.1 CH                         | C2, C5, C6, C8, C1', C2', C3', C5', C6', (C2'' in 3 Hz HMBC) |
| 4        | 1.92-1.86 m <sup>c</sup>                 | 48.2                            | C3, C5, C6, C8, C9, C10, C6'                                 |
| 5        | 1.76-1.66 m <sup>c</sup>                 | 25.8 CH <sub>2</sub>            | C3, C4, C6                                                   |
|          | 1.54-1.48 m                              |                                 |                                                              |
| 6        | 1.76-1.66 m <sup>c</sup>                 | 34.6 CH <sub>2</sub>            | C2, C3, C5, C6                                               |
| 7        | 1.48 s                                   | 28.2 CH <sub>3</sub>            | C6, C8, C9                                                   |
| 8        |                                          | 153.0 C                         |                                                              |
| 9        | 5.07, s 5.04, t 1.6                      | 111.4 CH <sub>2</sub>           | C6, C8, C10                                                  |
| 10       | 1.83 s                                   | 22.5 CH <sub>3</sub>            | C6, C8, C9                                                   |
|          |                                          |                                 |                                                              |
| 1'       |                                          | 160.1                           |                                                              |
| 2'       | 6.30 s                                   | 103.2 CH                        | C1', C2', C5', C1'' (C1, C6' in 3 Hz HMBC)                   |
| 3'       |                                          | 144.8 C                         |                                                              |
| 4'       | 6.27 s                                   | 109.7 CH                        | C1, C1', C2', C6', C1'', (C2' in 3Hz HMBC)                   |
| 5'       |                                          | 152.0 C                         |                                                              |
| 6'       |                                          | 116.8 C                         |                                                              |
|          |                                          |                                 |                                                              |
| 1''      | 2.49 t (8.0)                             | 36.0 CH <sub>2</sub>            | C3', C5', C2'', C3''                                         |
| 2''      | 1.61-1.55 m                              | 30.9 CH <sub>2</sub>            | C3', C3'', C4'', C1''                                        |
| 3''      | 1.35-1.26 m <sup>d</sup>                 | 31.5 CH <sub>2</sub>            | C1'', C2'', C4'', C5''                                       |
| 4''      | 1.35-1.26 m <sup>d</sup>                 | 22.6 CH <sub>2</sub>            | C1'', C2'', C4'', C5''                                       |
| 5''      | 0.88 t (6.8)                             | 14.0 CH <sub>3</sub>            | C3'', C4''                                                   |
|          |                                          |                                 |                                                              |
| OH       | 5.40 bs                                  |                                 | C1', C6', C5'                                                |



13. Summary of stereochemical assignment reported in reference 3.

a.

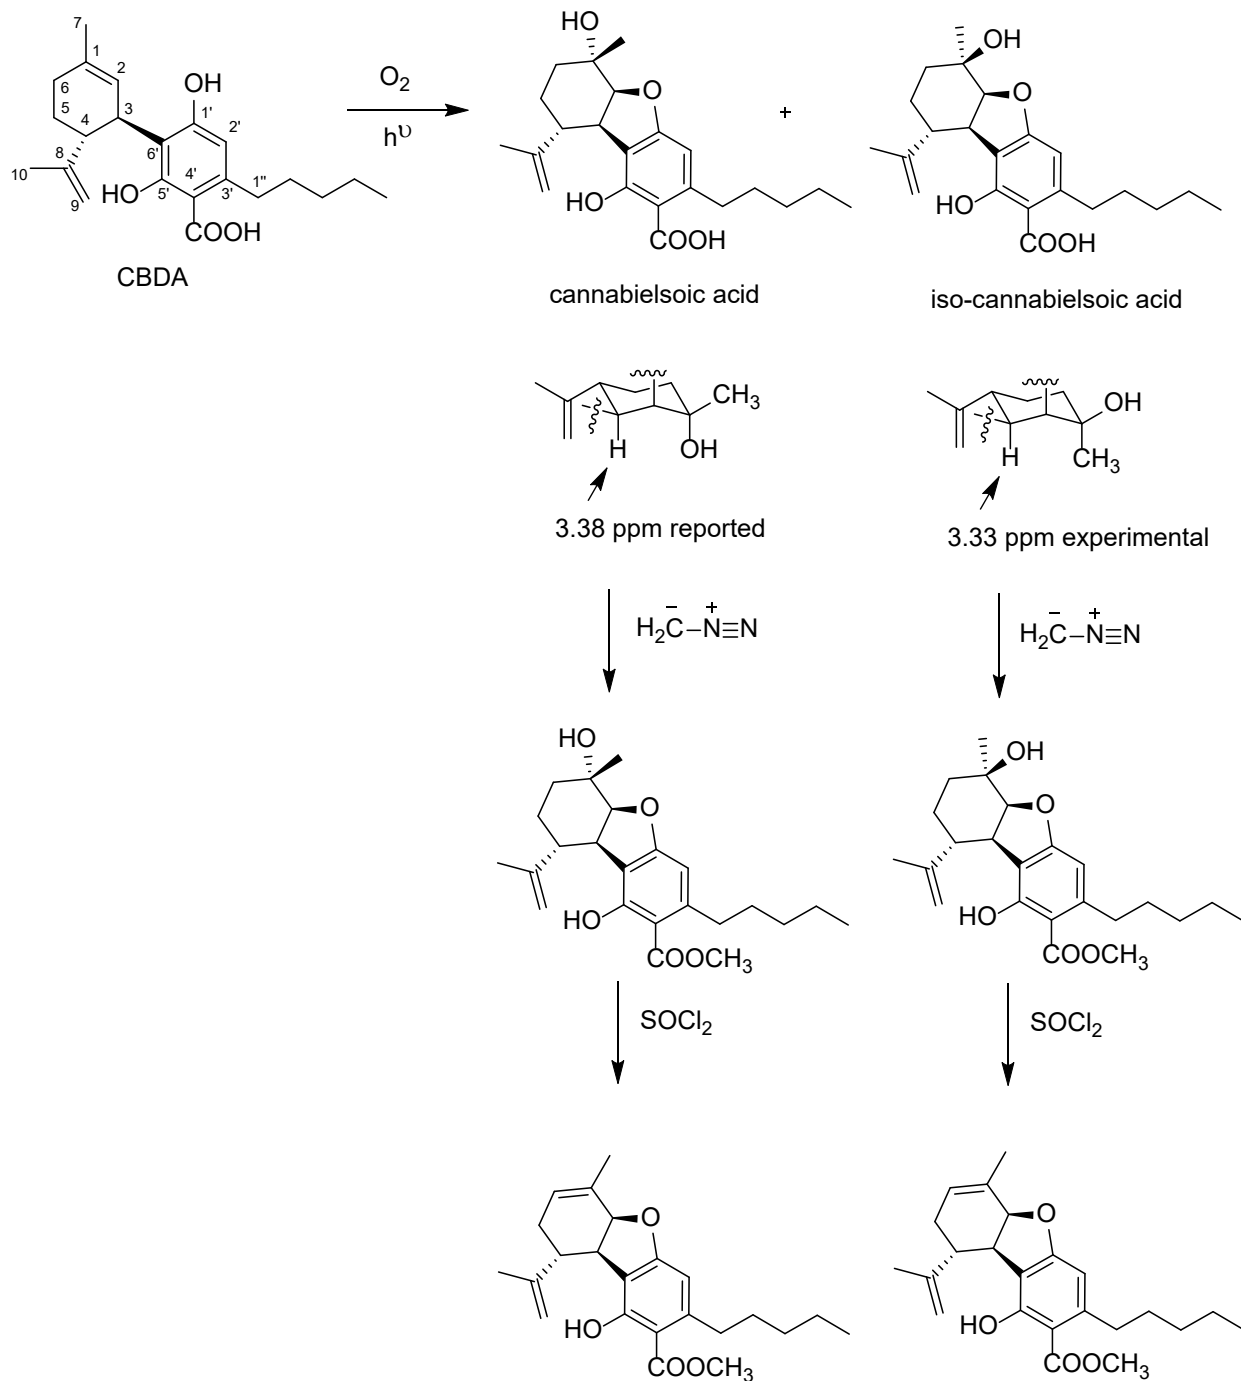

b.

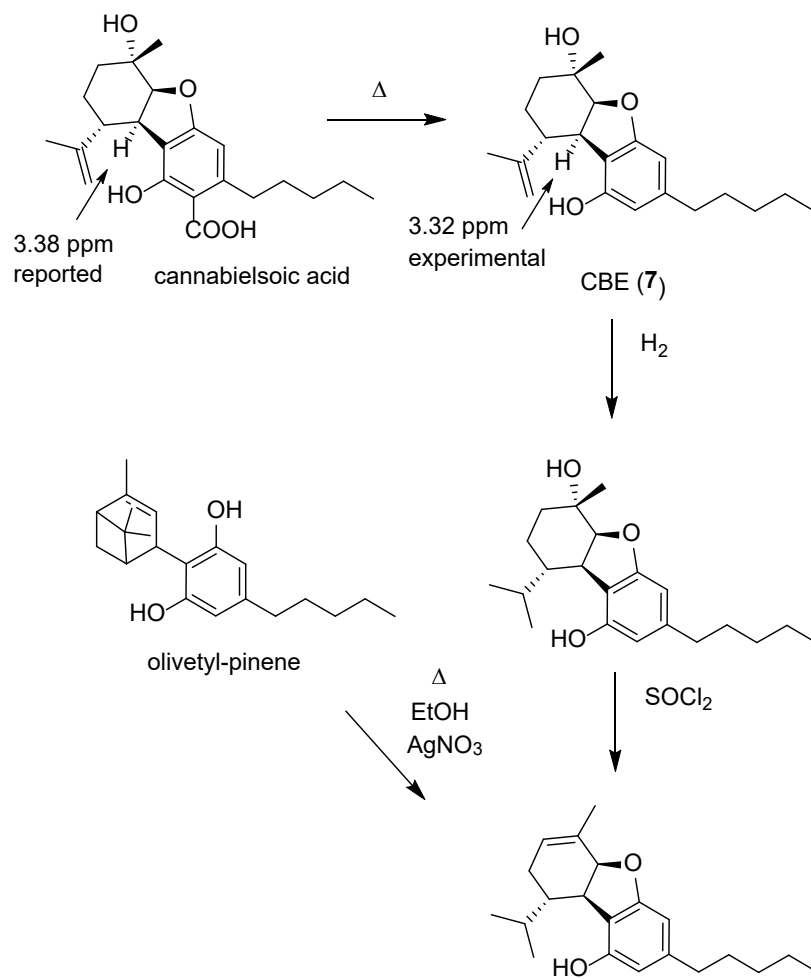

14. Comparison of actual CBE (7) NMR chemical shifts to those reported for the Oxone™ oxidation in reference 1.

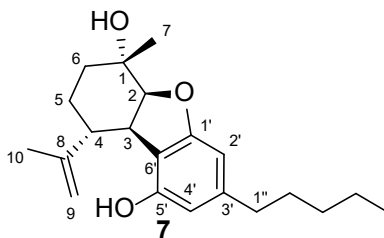

| Position | CBE (7)<br>$\delta_H$ multiplicity (J) | Reference 1            | CBE (7) $\delta_C$<br>multiplicity | Reference 1           |
|----------|----------------------------------------|------------------------|------------------------------------|-----------------------|
| 1        |                                        |                        | 69.3 C                             | 69.3 C                |
| 2        | 4.11 d (5.9)                           | 4.10 d (5.9)           | 89.3 CH                            | 89.4 CH               |
| 3        | 3.33, dd<br>(11.1, 5.9)                | 3.32 dd<br>(10.9, 5.9) | 42.1 CH                            | 42.1 CH               |
| 4        | 1.92-1.86 m                            | 1.92 – 1.84 m          | 48.2 CH <sub>2</sub>               | 48.5 CH <sub>2</sub>  |
| 5        | 1.76-1.66 m                            | 1.76-1.66 m            | 25.8 CH <sub>2</sub>               | 25.9 CH <sub>2</sub>  |
|          | 1.54-1.48 m                            | 1.54-1.48 m            |                                    |                       |
| 6        | 1.76-1.66 m                            | 1.76-1.66 m            | 34.6 CH <sub>2</sub>               | 34.7 CH <sub>2</sub>  |
| 7        | 1.48 s                                 | 1.48 s                 | 28.2 CH <sub>3</sub>               | 28.3 CH <sub>3</sub>  |
| 8        |                                        |                        | 153.0 C                            | 153.2 C               |
| 9        | 5.07, s 5.04, t 1.6                    | 5.03 d (11.1)          | 111.4 CH <sub>2</sub>              | 111.4 CH <sub>2</sub> |
| 10       | 1.83 s                                 | 1.82 s                 | 22.5 CH <sub>3</sub>               | 22.5 CH <sub>3</sub>  |
|          |                                        |                        |                                    |                       |
| 1'       |                                        |                        | 160.1                              | 160.1                 |
| 2'       | 6.30 s                                 | 6.29 s                 | 103.2 CH                           | 103.3 CH              |
| 3'       |                                        |                        | 144.8 C                            | 144.9 C               |
| 4'       | 6.27 s                                 | 6.26 s                 | 109.7 CH                           | 109.7 CH              |
| 5'       |                                        |                        | 152.0 C                            | 152.1 C               |
| 6'       |                                        |                        | 116.8 C                            | 116.9 C               |
|          |                                        |                        |                                    |                       |
| 1''      | 2.49 t (8.0)                           | 2.48 t (8.0)           | 36.0 CH <sub>2</sub>               | 36.1 CH <sub>2</sub>  |
| 2''      | 1.61-1.55 m                            | 1.61-1.55 m            | 30.9 CH <sub>2</sub>               | 30.9 CH <sub>2</sub>  |
| 3''      | 1.35-1.26 m                            | 1.35-1.26 m            | 31.5 CH <sub>2</sub>               | 31.6 CH <sub>2</sub>  |
| 4''      | 1.35-1.26 m                            | 1.35-1.26 m            | 22.6 CH <sub>2</sub>               | 22.6 CH <sub>2</sub>  |
| 5''      | 0.88 t (6.8)                           | 0.88 t (6.8)           | 14.0 CH <sub>3</sub>               | 14.1 CH <sub>3</sub>  |
|          |                                        |                        |                                    |                       |
| OH       | 5.40 bs                                | 5.40 bs                |                                    |                       |

15. Structures of 1*R*,2*S*-CBD epoxide (**5**), CBE (**7**), CBE with an alternate configuration at C1 (**8**) and the 6-membered cyclic ether analog (**9**).

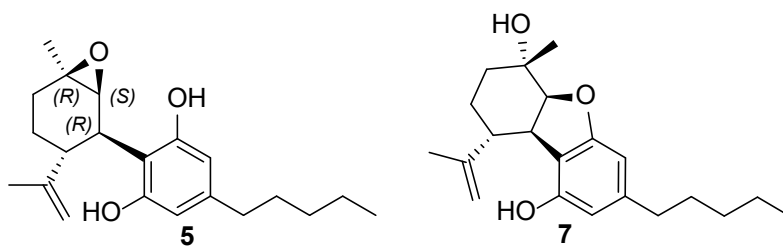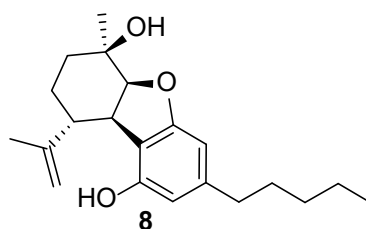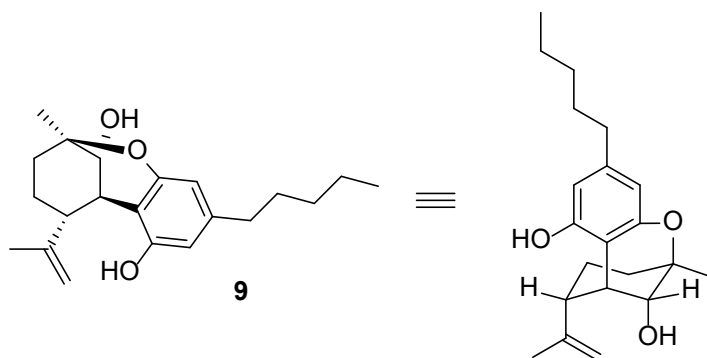

16. Experimental for (5), (7), (8), and (9) conformer search and DFT calculation of NMR parameters.

A low mode/torsional conformer search for each structure was performed using the Schrodinger Macromodel software package. A 1,000-step search using the OPLS3e forcefield identified all unique conformers within 5.0 kcal of the global energy minimum. These structures were first subjected to geometry optimization and energy calculations using the Schrodinger Jaguar package at the M06-2X-D3/6-31G(d,p) levels in parallel. Next, the M06-2X-D3/6-31G(d,p) geometry-optimized structure was subjected to GIAO NMR chemical shift calculations at the mPW1PW91/6-311+G(2d,p) level. NMR chemical shifts for the latter calculations were referenced and scaled according to the following reference: Pierens, G. K. *J. Comput. Chem.* **2014**, **35**, 1388-1394.

See excerpts from Jaguar and Gaussian output files for additional details in SI-2.

17. Conformations of 1R, 2S-epoxy CBD (**5**) used for calculation of NMR parameters.

Conformation 1

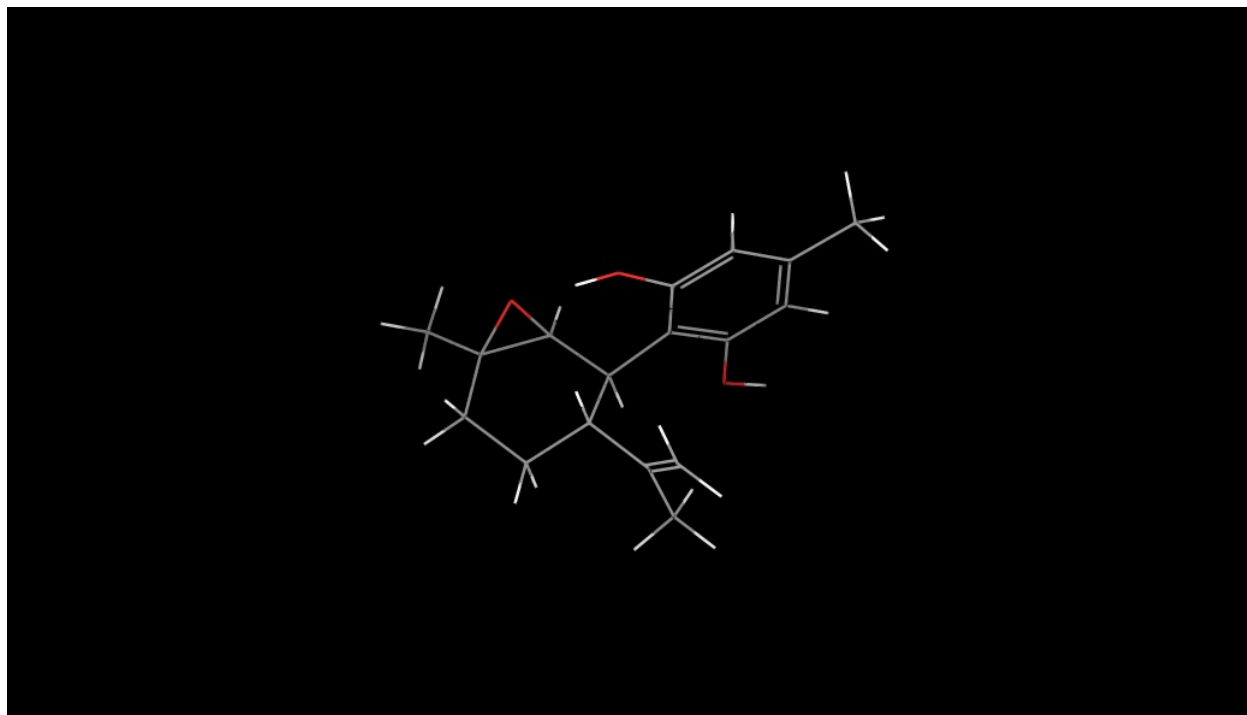

Conformation 2

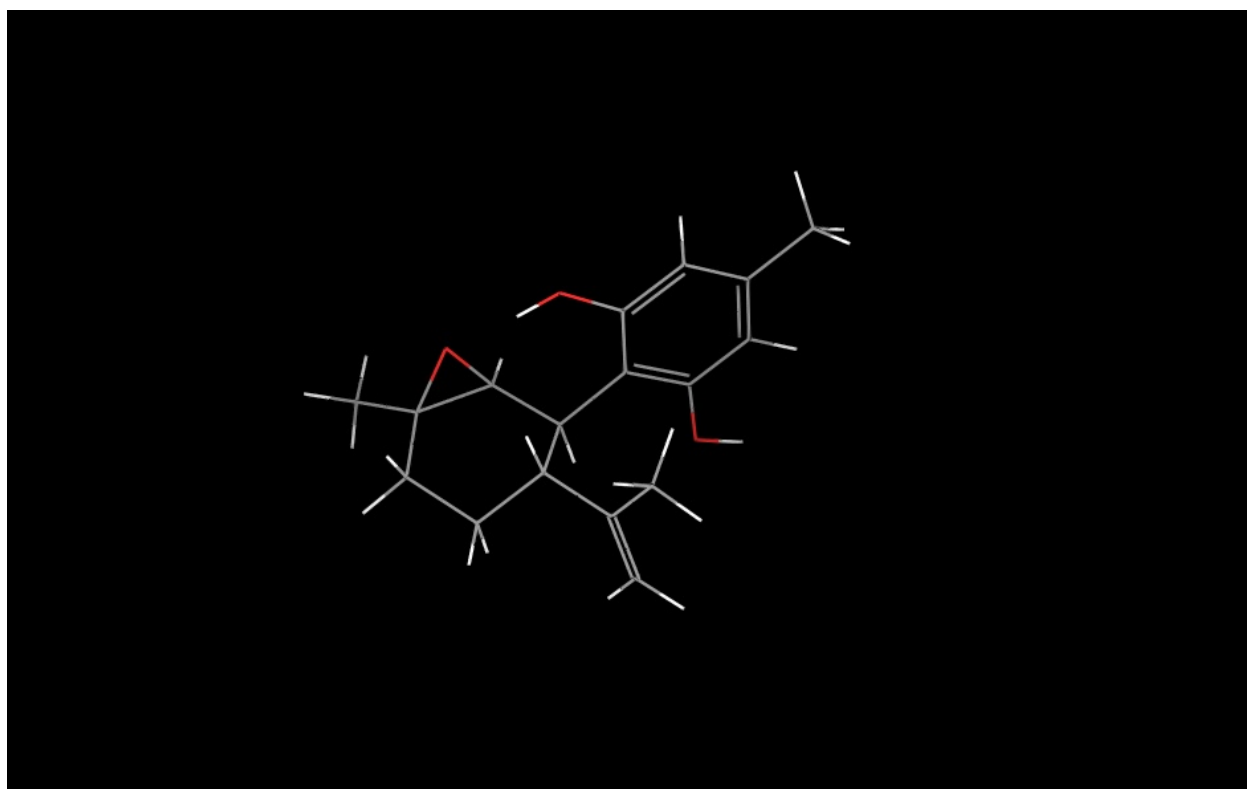

Conformation 3

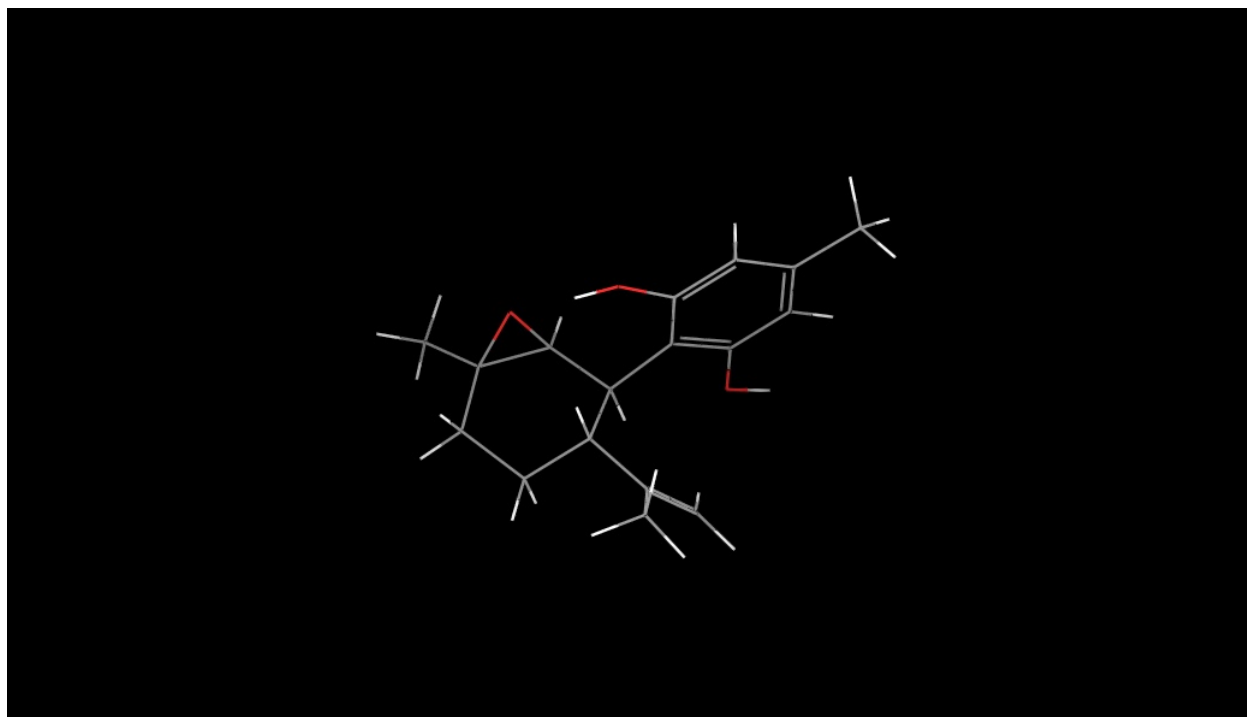

Conformation 4

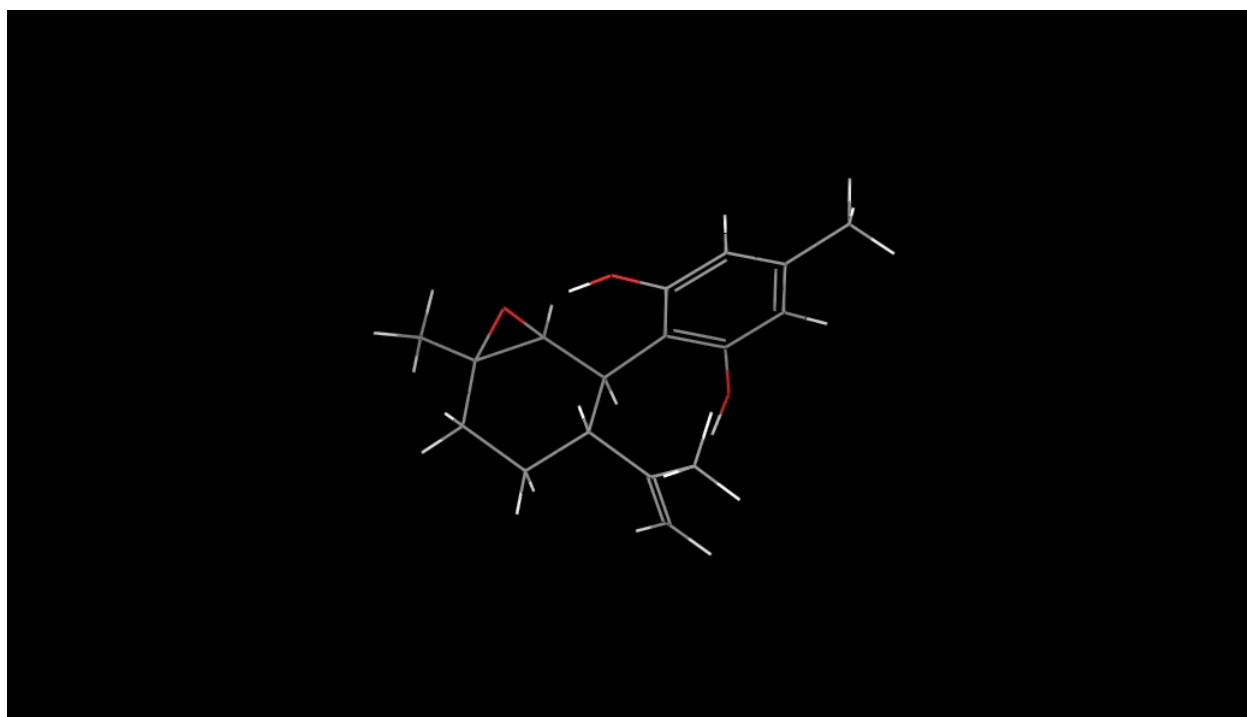

18. Conformations of CBE (7) used for calculation of NMR parameters.

Conformation 1

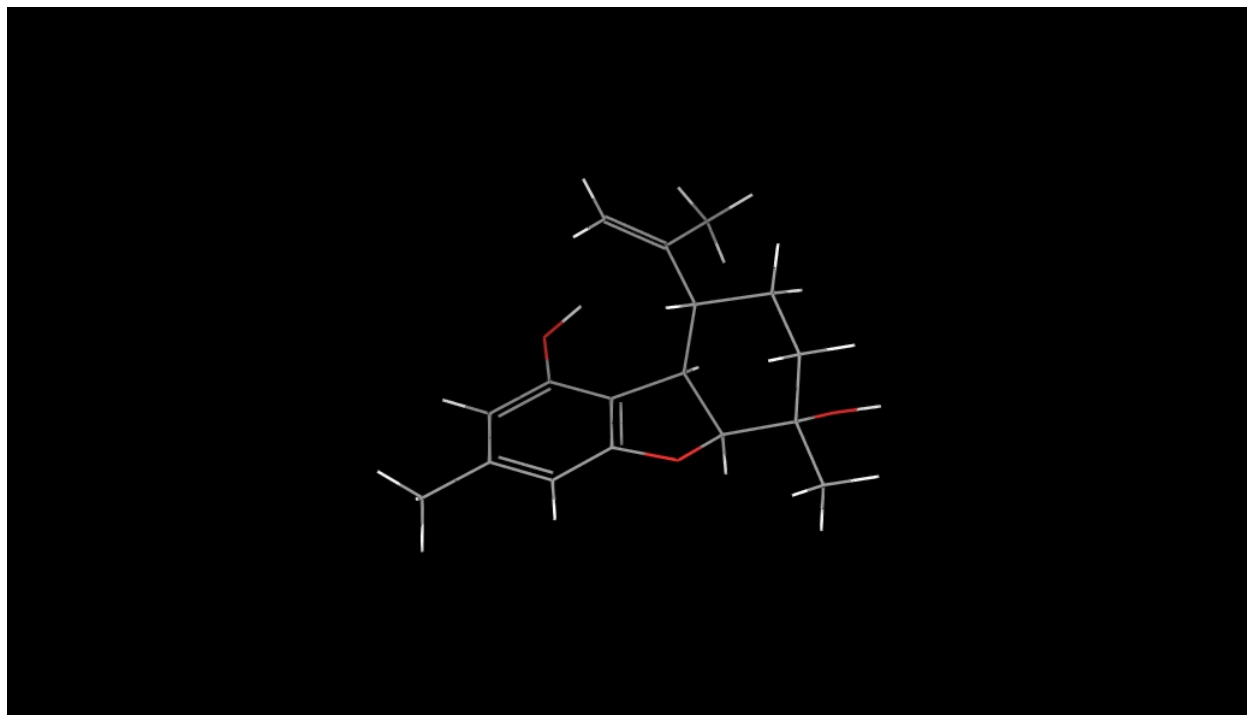

Conformation 2

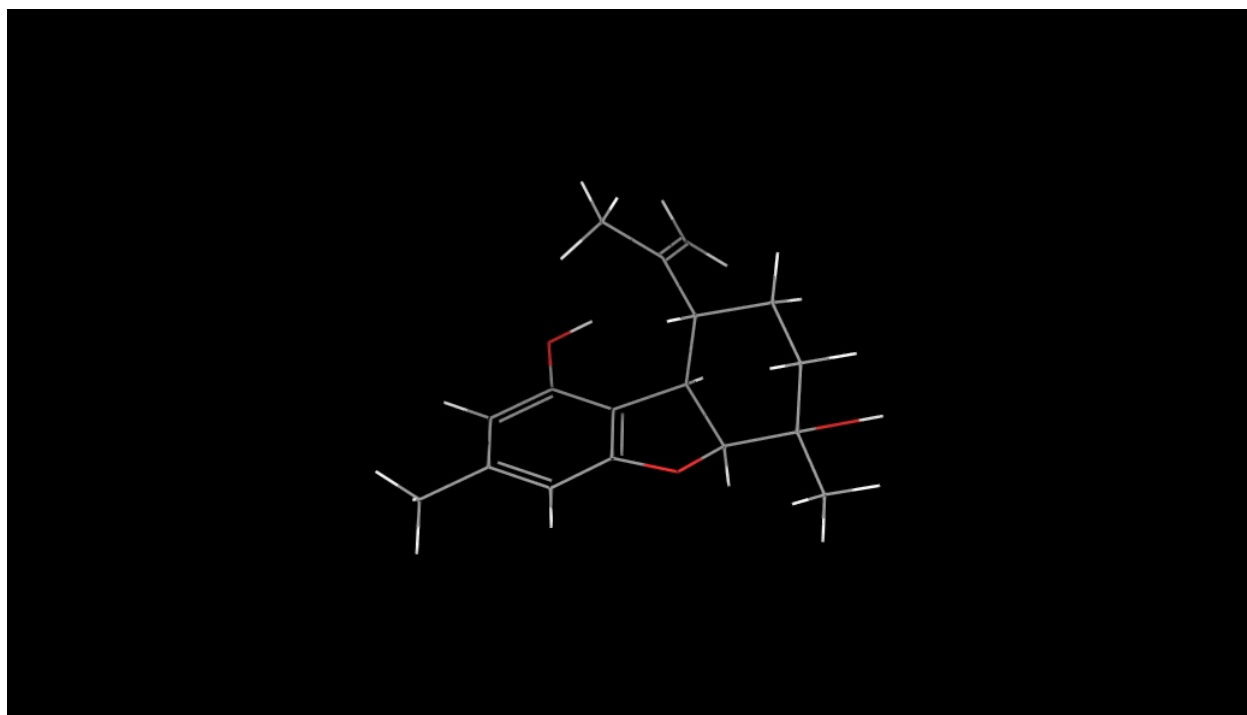



Conformation 3

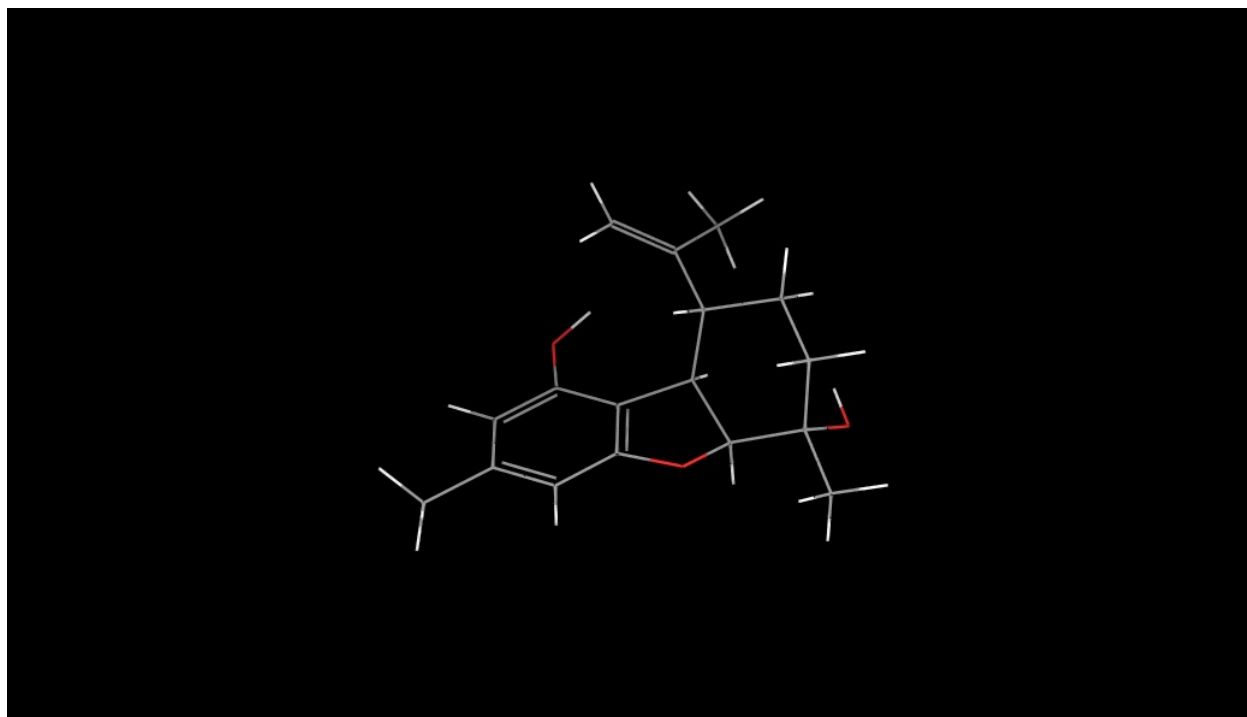

Conformation 4

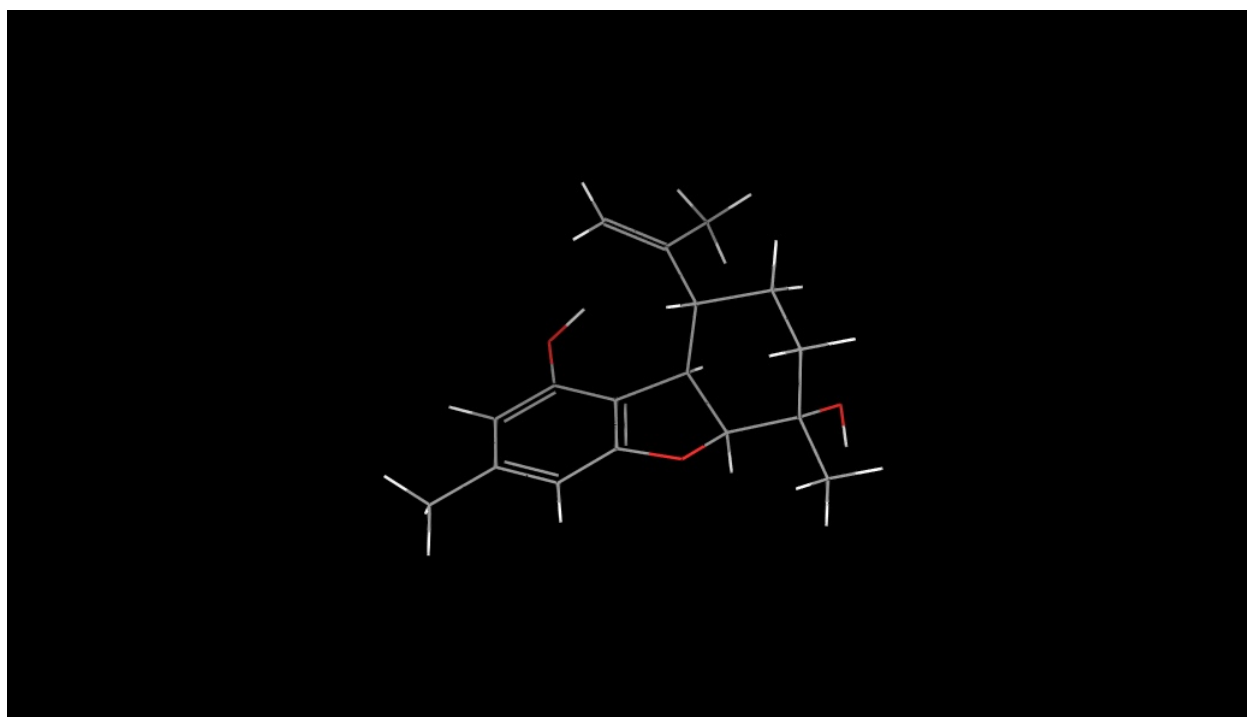

Conformation 5

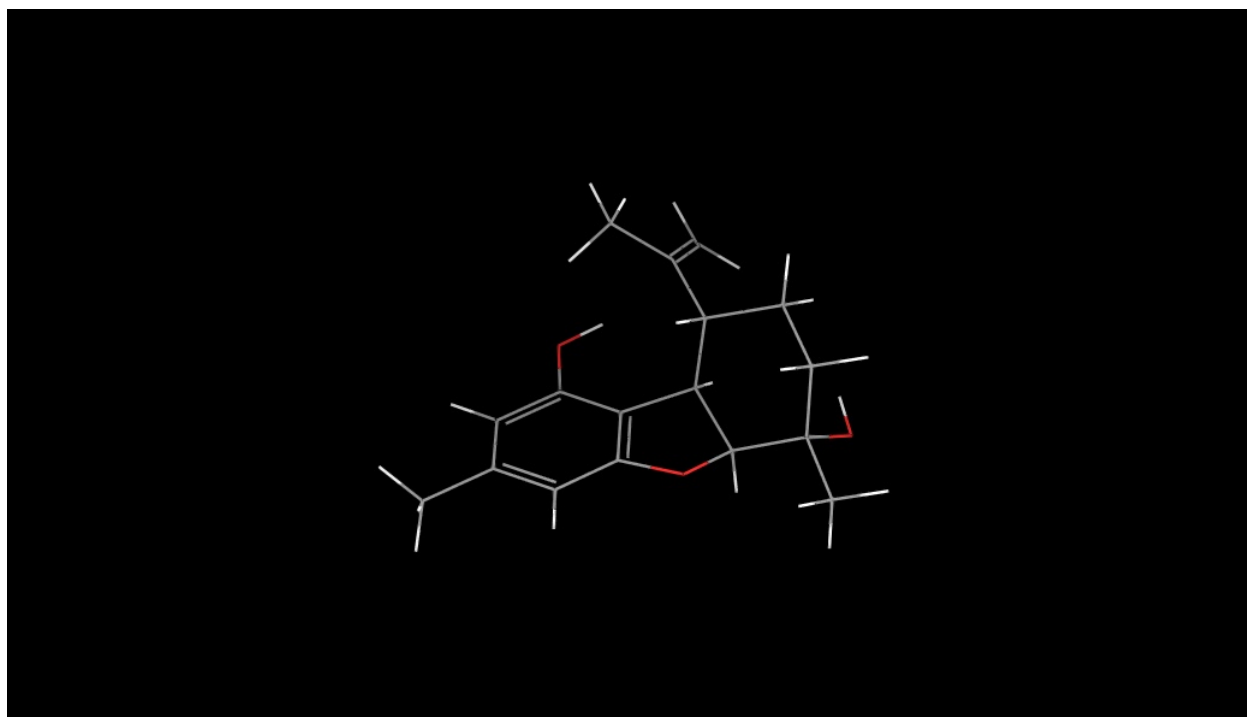

Conformation 6

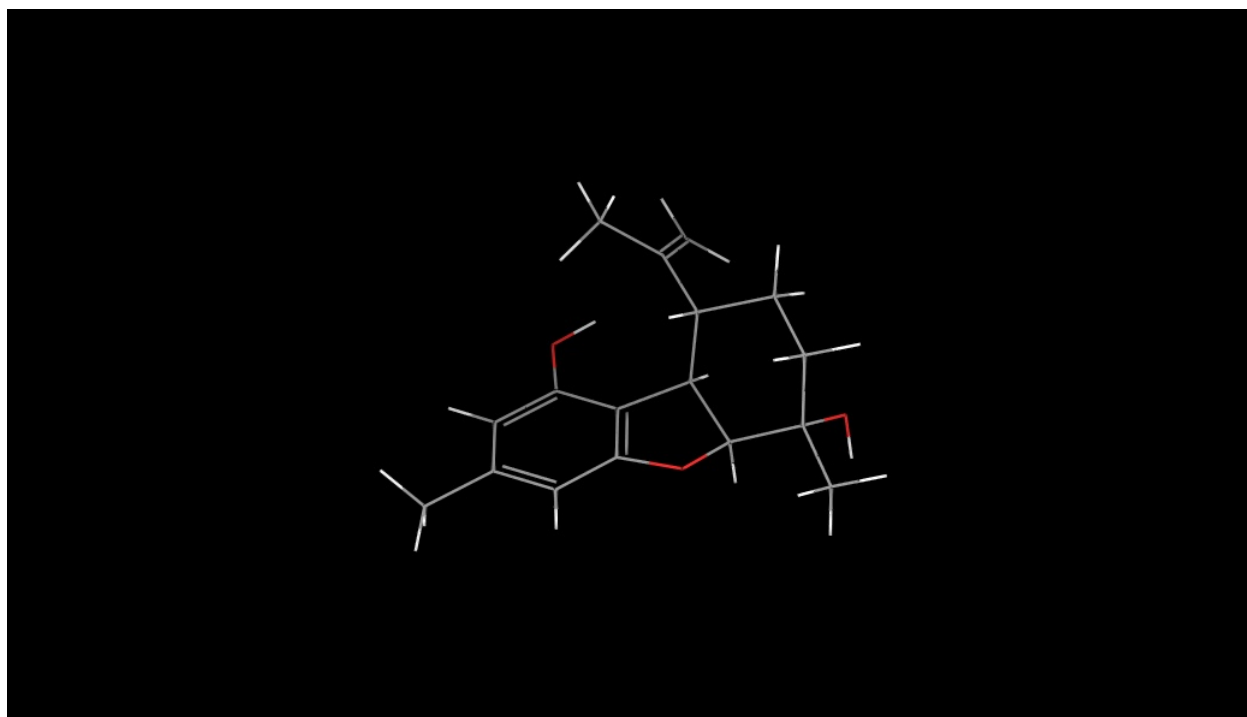

19. Conformations of CBE with alternate configuration at C1 (**8**) used for calculation of NMR parameters.

Conformation 1

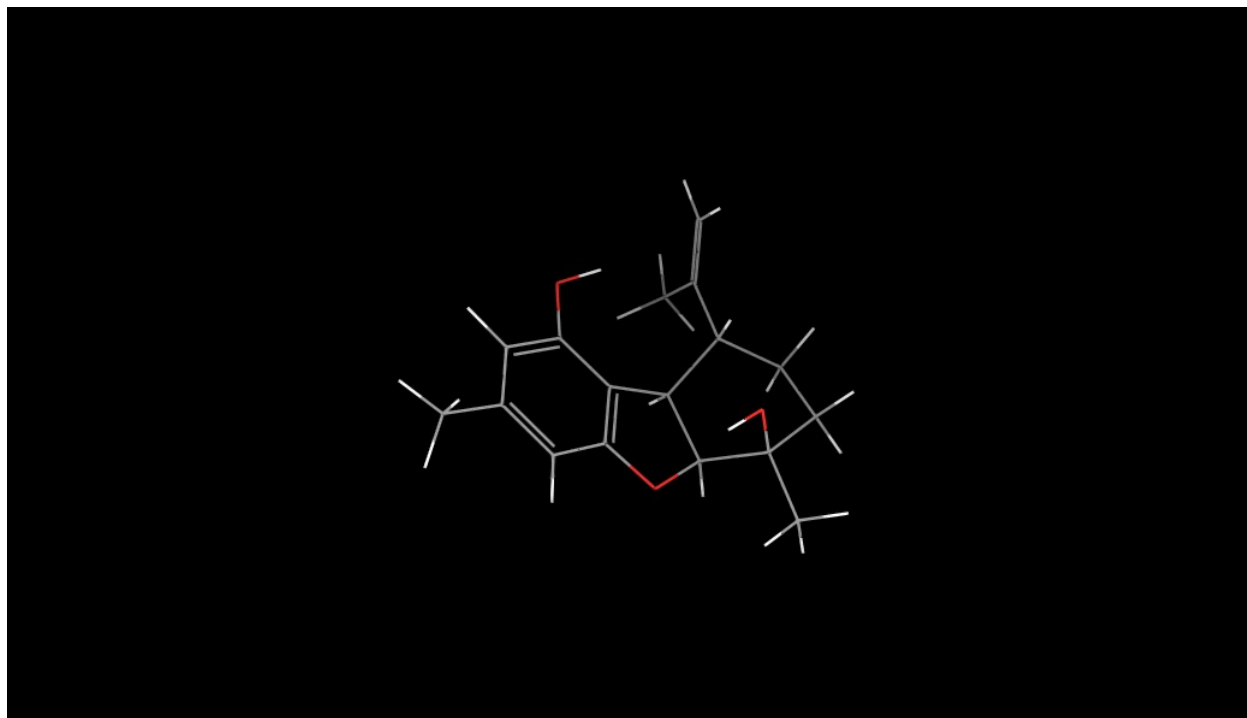

Conformation 2

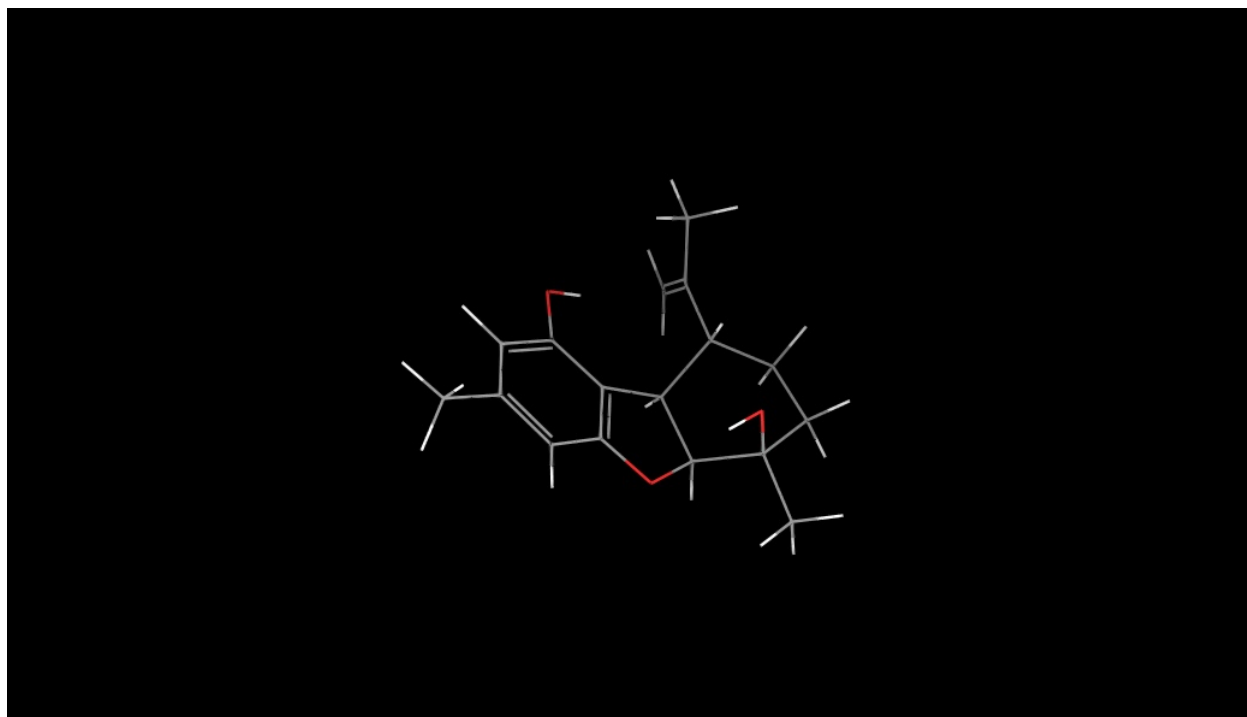

Conformation 3

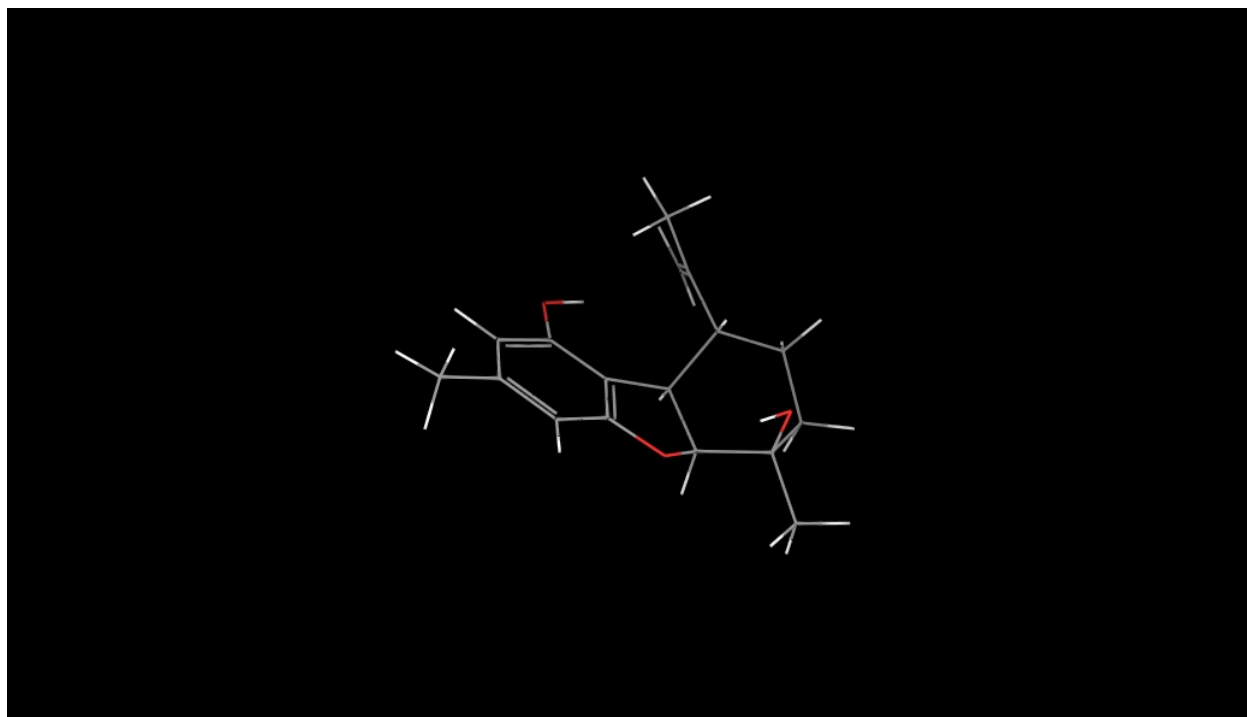

Conformation 4

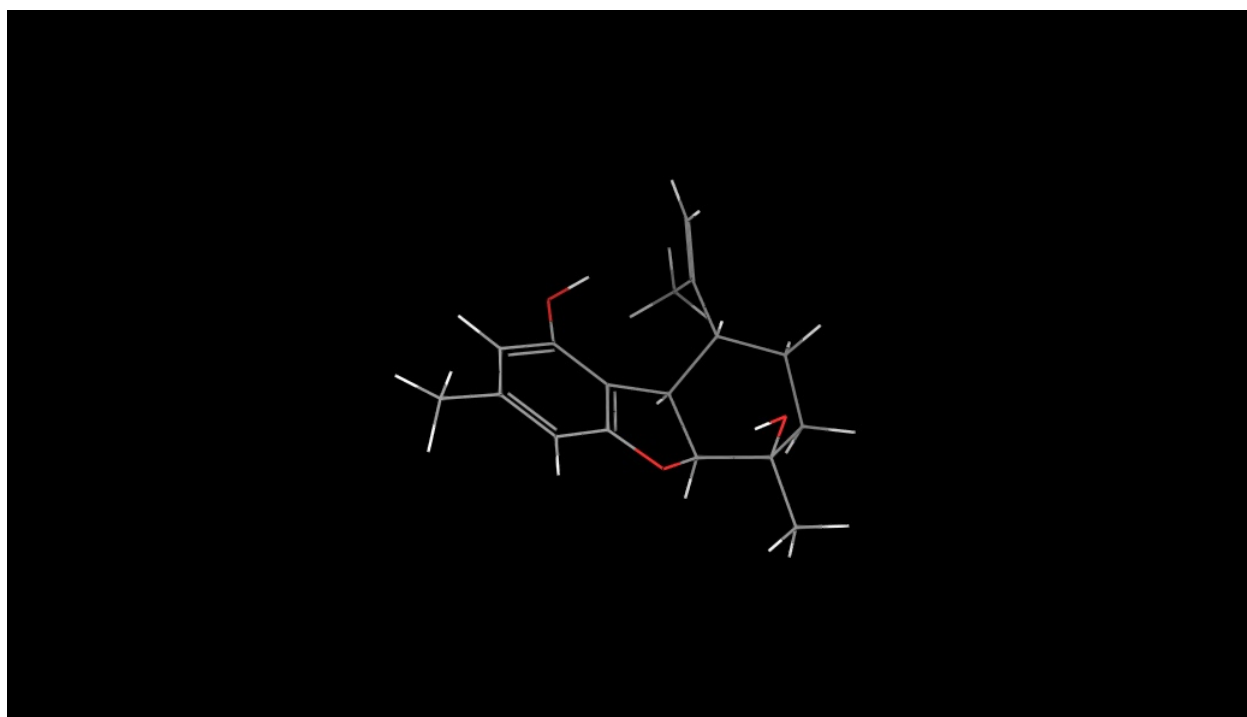

Conformation 5

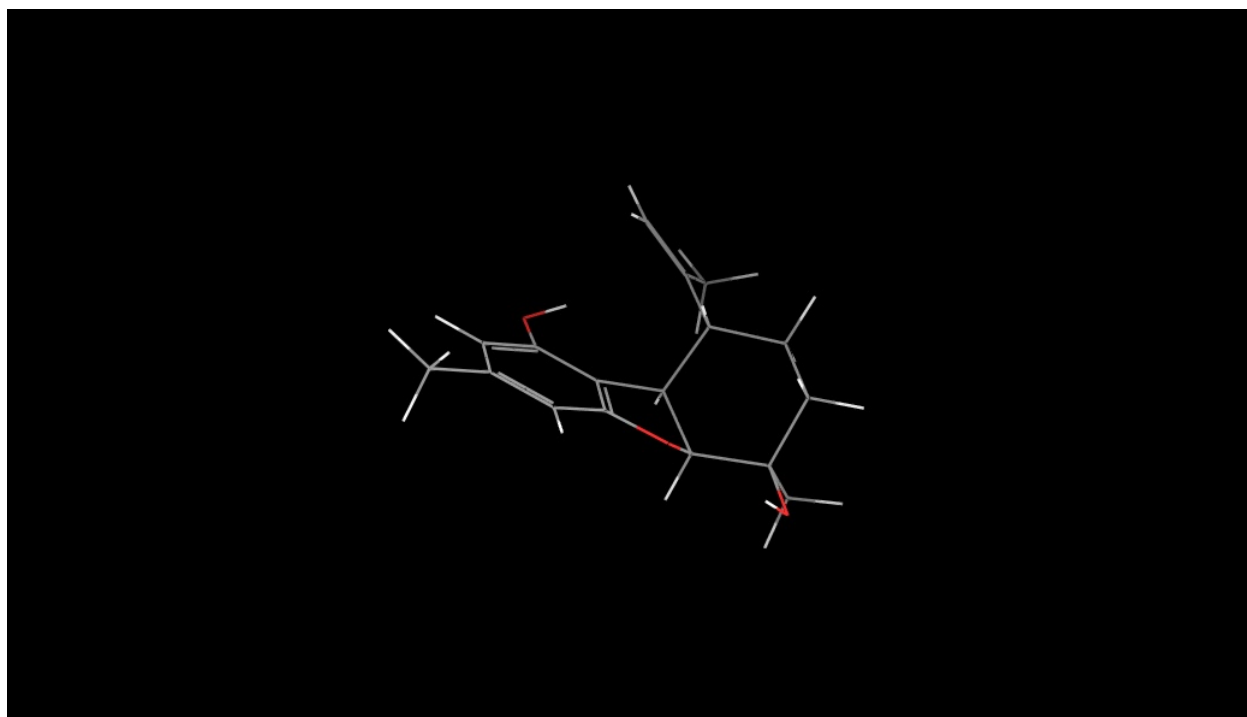

Conformation 6

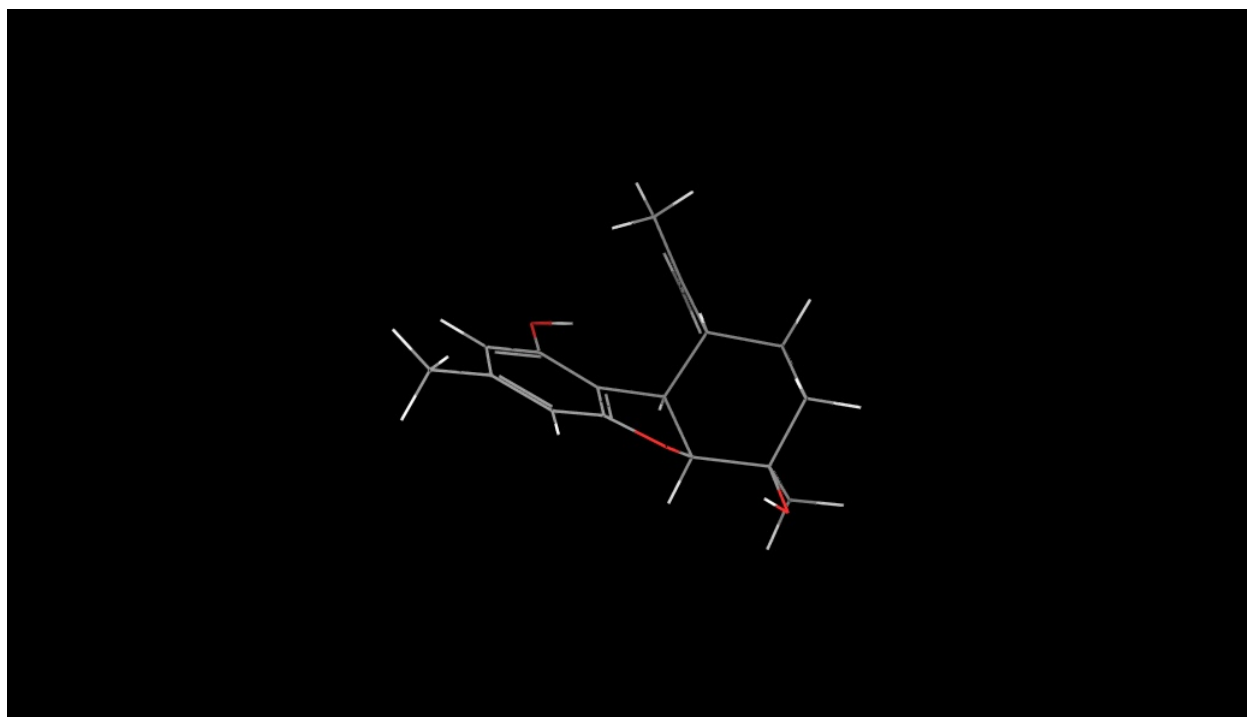

20. Conformations of 6-membered cyclic ether (**9**) used for calculation of NMR parameters.

Conformation 1

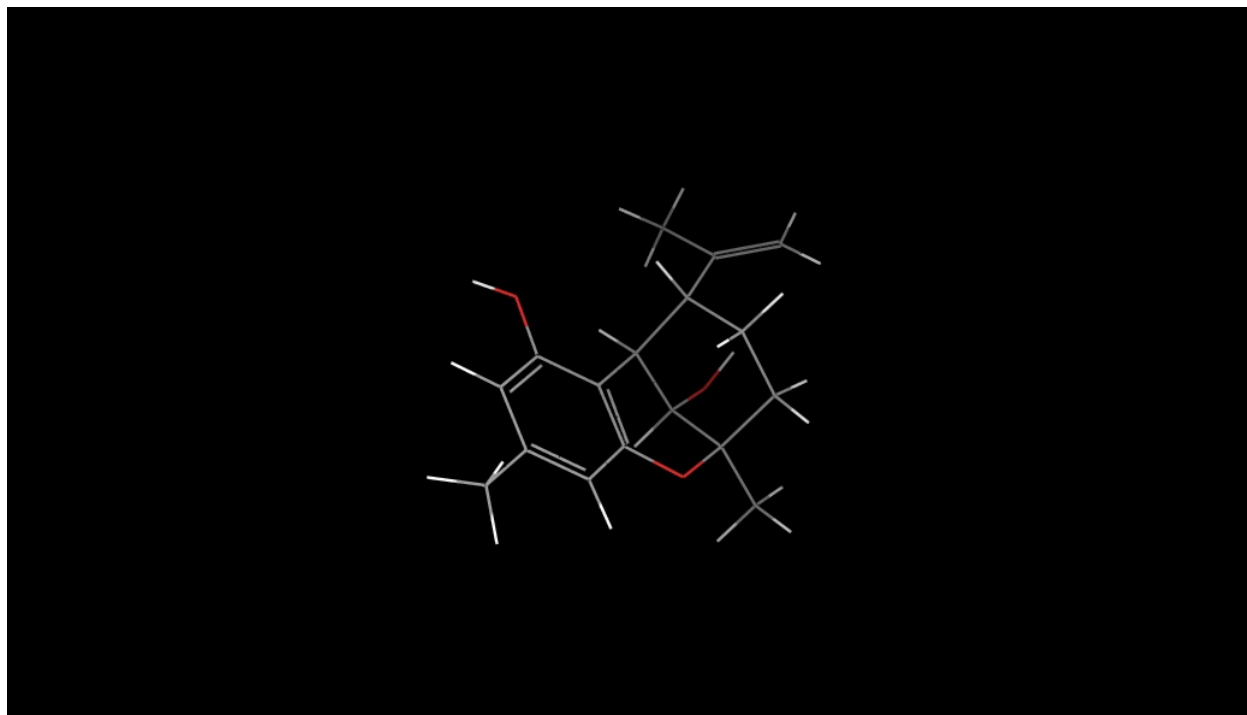

Conformation 2

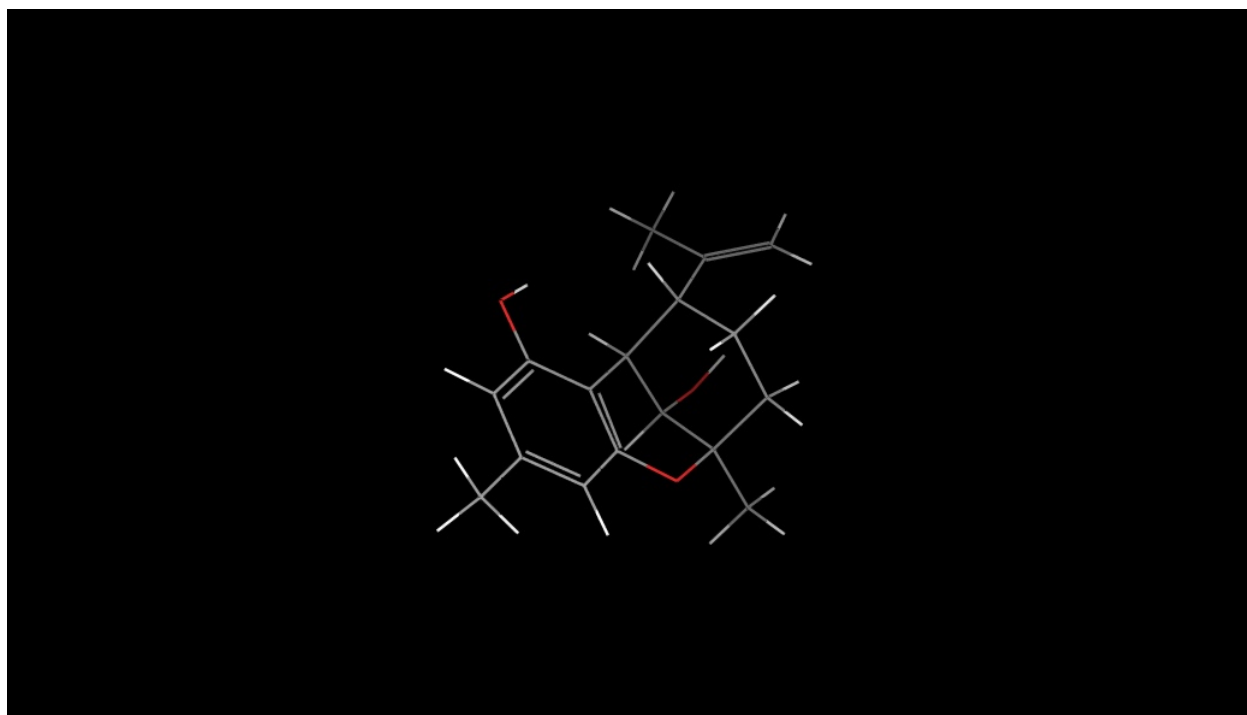

Conformation 3

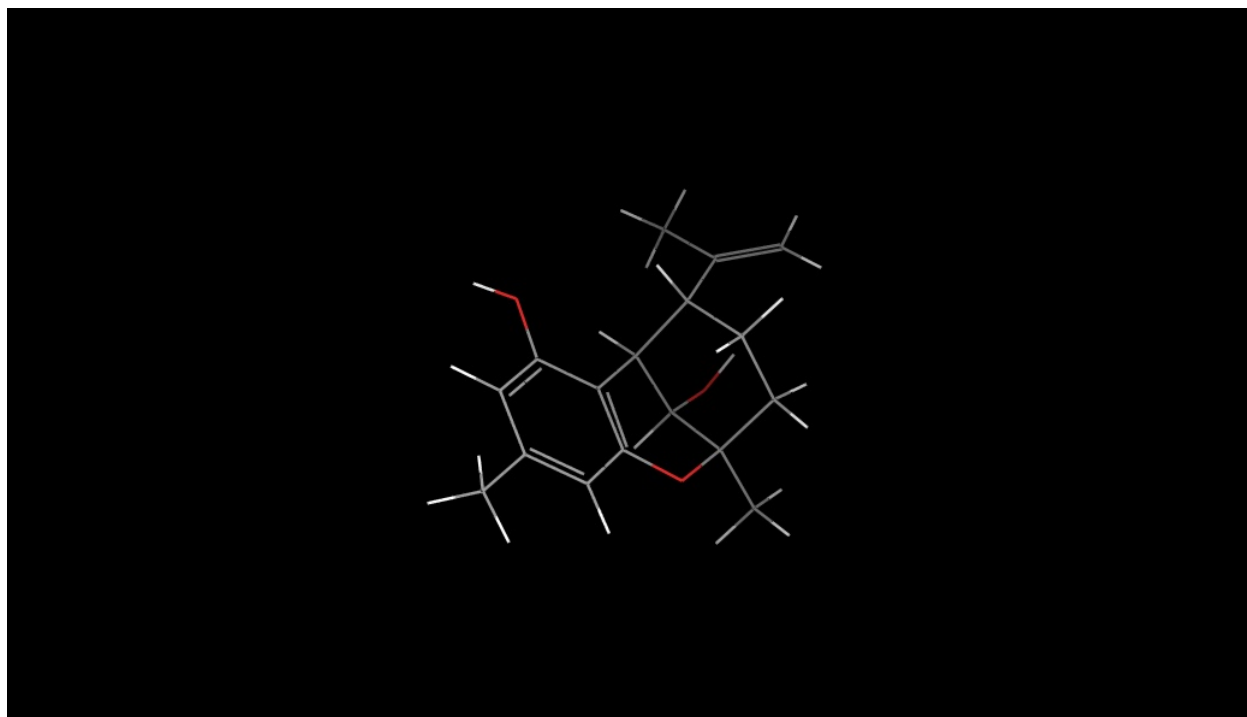

Conformation 4

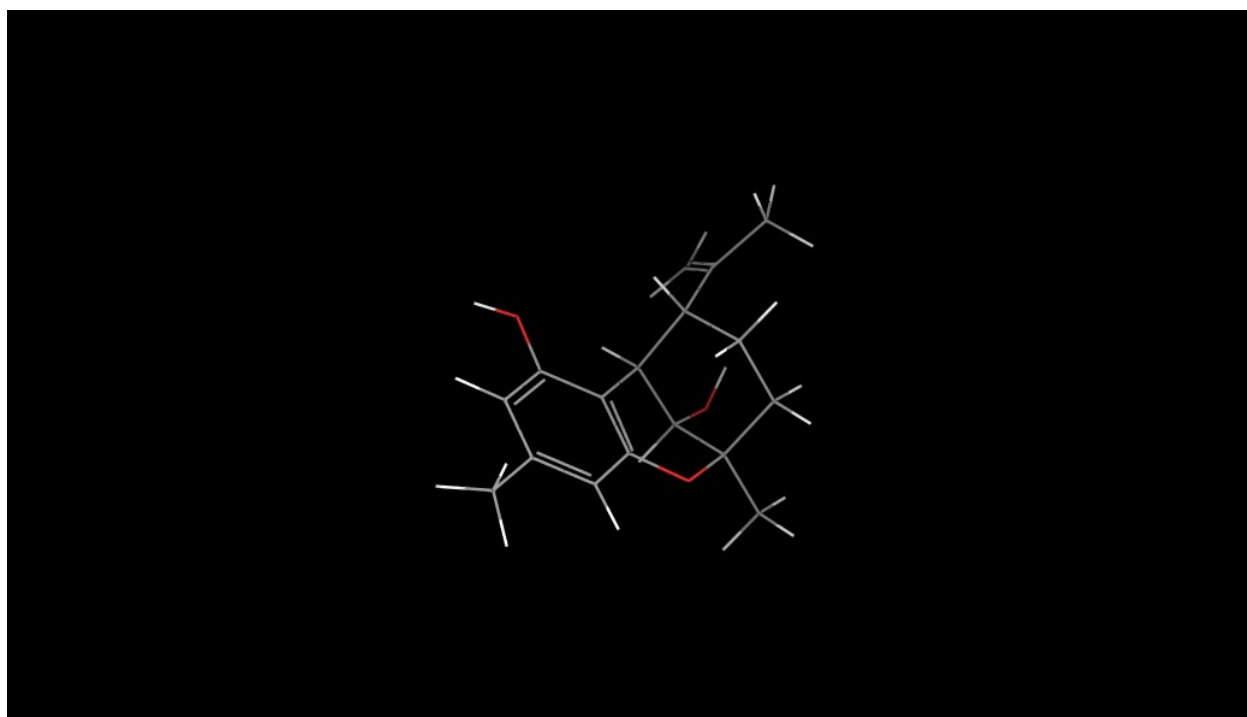

21. Comparison of ROESY analysis for (7) and (8).

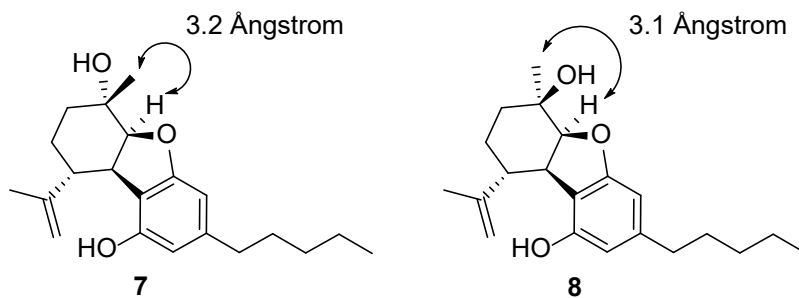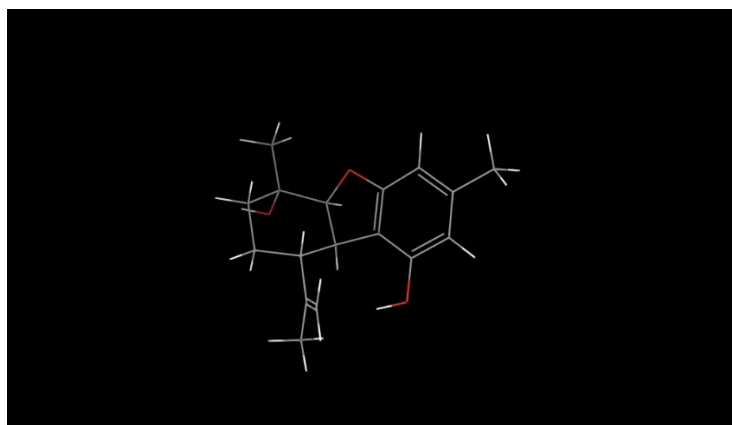

7

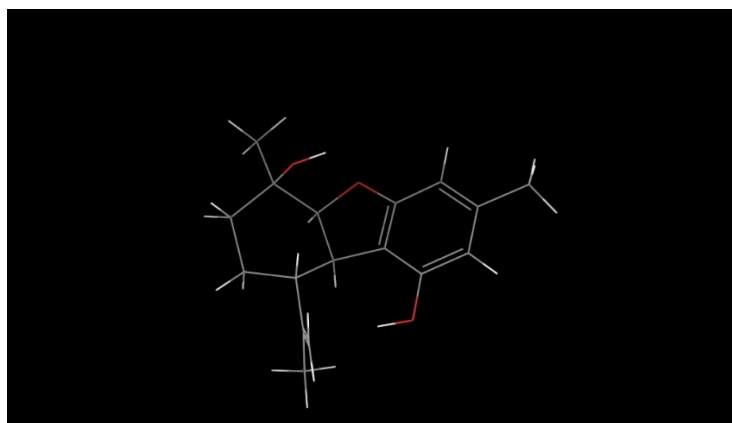

8



22. Table of calculated  $^{13}\text{C}$  chemical shifts for (**5**), (**7**), (**8**), and (**9**) from calculations performed at the mPW1PW91/6-311+G(2d,p)//M06-2X-D3/6-31G(d,p) level.

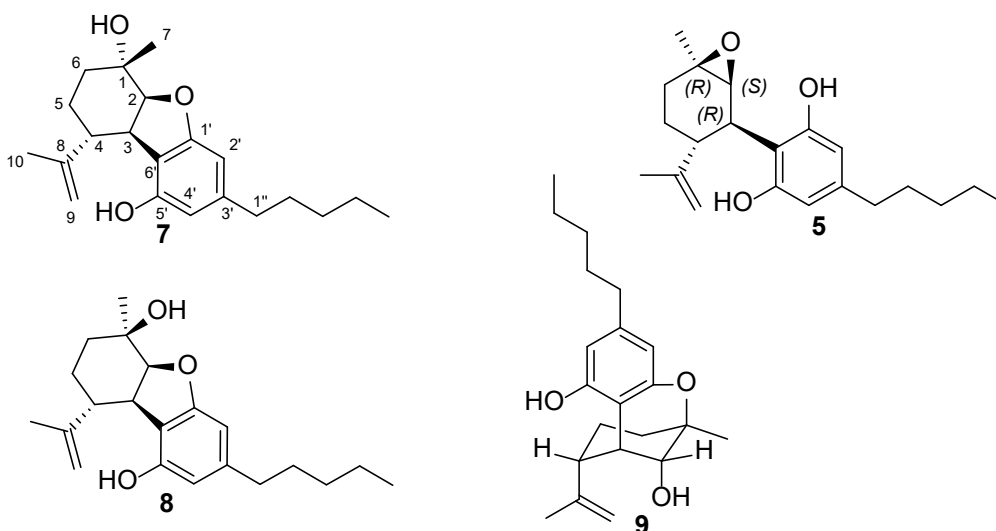

| Atom #     | CBE ( <b>7</b> ) | CBE RCSA Optimized ( <b>7</b> ) | 1 <i>R</i> , 2 <i>S</i> -CBD Epoxide ( <b>5</b> ) | CBD Alternate Configuration at C1 ( <b>8</b> ) | 6-Membered Cyclic Ether ( <b>9</b> ) |
|------------|------------------|---------------------------------|---------------------------------------------------|------------------------------------------------|--------------------------------------|
| 1          | 68.1             | 67.7                            | 58.9                                              | 68.3                                           | 75.7                                 |
| 2          | 88.5             | 89.3                            | 63.9                                              | 87.8                                           | 72.8                                 |
| 3          | 47.2             | 46.1                            | 37.8                                              | 49.2                                           | 35.1                                 |
| 4          | 49.3             | 49.4                            | 39.2                                              | 47.2                                           | 43.9                                 |
| 5          | 29.7             | 25.7                            | 29.6                                              | 29.5                                           | 20.1                                 |
| 6          | 34.7             | 33.6                            | 30.1                                              | 34.8                                           | 29.8                                 |
| 7          | 27.3             | 26.5                            | 23                                                | 24.2                                           | 24.7                                 |
| 8          | 161.8            | 160.2                           | 152.4                                             | 163.4                                          | 156.9                                |
| 9          | 112.7            | 113.5                           | 112.1                                             | 112                                            | 109.6                                |
| 10         | 24.3             | 22.7                            | 19.6                                              | 25.2                                           | 23.3                                 |
| 1'         | 154.5            | 161.5                           | 154.2                                             | 154.4                                          | 153.1                                |
| 2'         | 115.1            | 102.5                           | 110                                               | 114.1                                          | 109.8                                |
| 3'         | 161.6            | 141.3                           | 159.5                                             | 160.4                                          | 157.6                                |
| 4'         | 102.3            | 109.9                           | 111.6                                             | 101.8                                          | 108.2                                |
| 5'         | 141.1            | 154.5                           | 139.8                                             | 141.5                                          | 139.4                                |
| 6'         | 109.6            | 115.2                           | 104                                               | 109.8                                          | 103                                  |
| <b>MAE</b> | <b>2.2</b>       | <b>1.8</b>                      | <b>6</b>                                          | <b>2.7</b>                                     | <b>5.2</b>                           |

23. Graphical comparison of calculated experimental  $^{13}\text{C}$  chemical shifts (ppm) for (7), (5), (8) and (9) from calculations performed at the mPW1PW91/6-311+G(2d,p)//M06-2X-D3/6-31G(d,p) level.

| Atom # | CBE (7)    | CBE (7)<br>RCSA Optimized | 1R, 2S-CBD<br>Epoxide (5) | CBD Alternate<br>Configuration (8) | 6-Membered<br>Cyclic Ether (9) |
|--------|------------|---------------------------|---------------------------|------------------------------------|--------------------------------|
| 1      | -1.2       | -1.6                      | -10.4                     | -1.0                               | 6.4                            |
| 2      | -0.9       | -0.1                      | -25.5                     | -1.6                               | -16.6                          |
| 3      | 5.1        | 4.0                       | -4.3                      | 7.1                                | -7.0                           |
| 4      | 0.8        | 0.9                       | -9.3                      | -1.3                               | -4.6                           |
| 5      | 3.8        | -0.2                      | 3.7                       | 3.6                                | -5.8                           |
| 6      | 0.0        | -1.1                      | -4.6                      | 0.1                                | -4.9                           |
| 7      | -1.0       | -1.8                      | -5.3                      | -4.1                               | -3.6                           |
| 8      | 8.6        | 7.0                       | -0.8                      | 10.2                               | 3.7                            |
| 9      | 1.3        | 2.1                       | 0.7                       | 0.6                                | -1.8                           |
| 10     | 1.8        | 0.2                       | -2.9                      | 2.7                                | 0.8                            |
| 1'     | 1.5        | 1.4                       | -0.6                      | 0.3                                | -2.5                           |
| 2'     | -1.0       | -0.8                      | 8.3                       | -1.5                               | 4.9                            |
| 3'     | -3.8       | -3.6                      | -5.1                      | -3.4                               | -5.5                           |
| 4'     | -0.1       | 0.2                       | -5.7                      | 0.1                                | -6.7                           |
| 5'     | 2.4        | 2.4                       | 2.1                       | 2.3                                | 1.0                            |
| 6'     | -1.8       | -1.7                      | -6.9                      | -2.8                               | -7.1                           |
| MAE    | <b>2.2</b> | <b>1.8</b>                | <b>6.0</b>                | <b>2.7</b>                         | <b>5.2</b>                     |

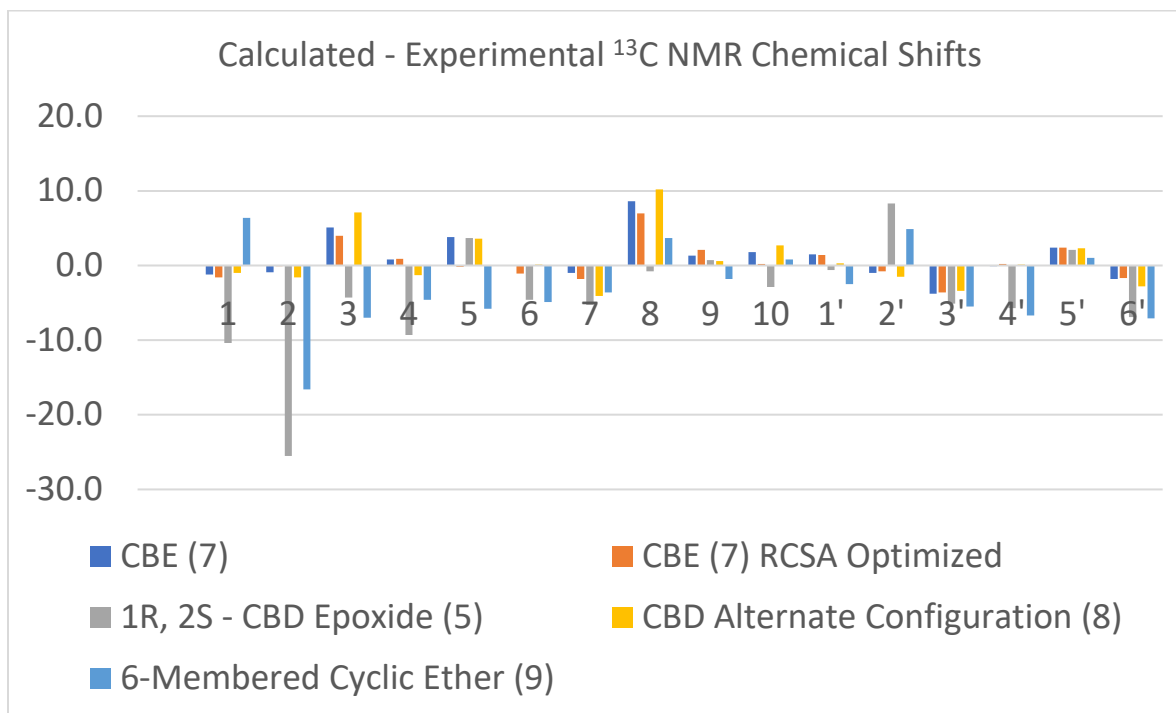

#### 24. Experimental for RCSA sample preparation and analysis for CBE (7).

A total of 66.1 mg of poly- $\gamma$ -benzyl-L-glutamate (PBLG, Sigma-Aldrich Cat# P5136, Lot# SLBP1675V, MW by viscosity 249,000) – 150 – 350 KDa molecular weight range – was iteratively added to the 600  $\mu$ L CDCl<sub>3</sub> solution (11.0% w/v) of 4.0 mg of CBE (7) contained in a 5 mm NMR tube. Multiple tube inversion and spin down cycles in a centrifuge allowed the PBLG to fully dissolve, providing a homogenous viscous liquid. A <sup>2</sup>H NMR spectrum (92.1 MHz, 4201.7 Hz spectral width, 32,768 points and 4 scans) was acquired with the Bruker pulse sequence “zg2h” to confirm that the solution was biphasic. 1D <sup>13</sup>C NMR data (150.9 MHz, 36,231 Hz spectral width, 65,536 points and 20480 scans) were then acquired using the Bruker pulse sequence “zgdc30” utilizing GARP decoupling (60  $\mu$ sec 90° pulse at 17.942 watts).

25. Certificate of analysis for PBLG used in this study.

**SIGMA-ALDRICH®**

[sigma-aldrich.com](http://sigma-aldrich.com)

3050 Spruce Street, Saint Louis, MO 63103, USA

Website: [www.sigmaaldrich.com](http://www.sigmaaldrich.com)

Email USA: [techserv@sial.com](mailto:techserv@sial.com)

Outside USA: [eurtechserv@sial.com](mailto:eurtechserv@sial.com)

## Certificate of Analysis

Product Name:

Poly- $\gamma$ -benzyl-L-glutamate - mol wt 150,000-350,000

Product Number: P5136  
Batch Number: SLBP1675V  
Brand: SIGMA  
CAS Number: 25014-27-1  
MDL Number: MFCD00166357  
Storage Temperature: Store at -20 °C  
Quality Release Date: 12 OCT 2015

| Test                                                  | Specification             | Result             |
|-------------------------------------------------------|---------------------------|--------------------|
| Appearance (Color)                                    | White to Light Yellow     | White              |
| Appearance (Form)                                     | Powder                    | Powder             |
| Solubility (Color)                                    | Colorless to Light Yellow | Colorless          |
| Solubility (Turbidity)<br>50 mg/mL, CHCl <sub>3</sub> | Clear to Slightly Hazy    | Very Slightly Hazy |
| Water (by Karl Fischer)                               | ≤ 10 %                    | 0 %                |
| Degree of Polymerization<br>by viscosity              | 685 - 1598                | 1137               |
| Molecular Weight by Viscosity                         | 150000 - 350000           | 249000             |



Rodney Burbach, Manager  
Analytical Services  
St. Louis, Missouri US

Sigma-Aldrich warrants, that at the time of the quality release or subsequent retest date this product conformed to the information contained in this publication. The current Specification sheet may be available at [Sigma-Aldrich.com](http://Sigma-Aldrich.com). For further inquiries, please contact Technical Service. Purchaser must determine the suitability of the product for its particular use. See reverse side of invoice or packing slip for additional terms and conditions of sale.

26. 1D  $^2\text{H}$  NMR (92.1 MHz) of biphasic isotropic/anisotropic CBE (**7**) and PBLG in  $\text{CDCl}_3$ .  
The  $^2\text{H}$  quadrupolar splitting was 196.9 Hz.

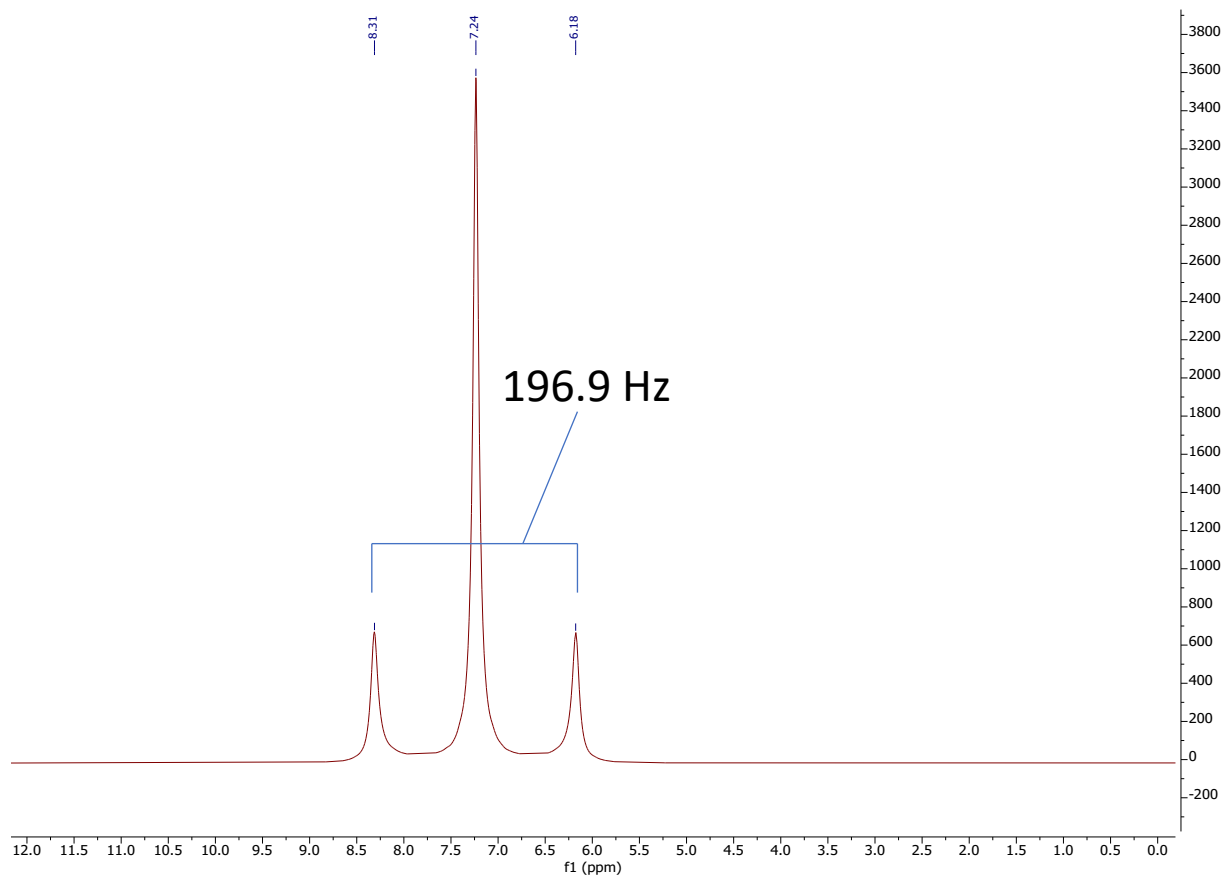

27. 1D  $^{13}\text{C}$  NMR data (150.9 MHz) for biphasic isotropic/anisotropic CBE (**7**) in PBLG/  $\text{CDCl}_3$ .

Top spectrum: Normal processing parameters. Bottom spectrum: Processed with Global Spectral deconvolution.

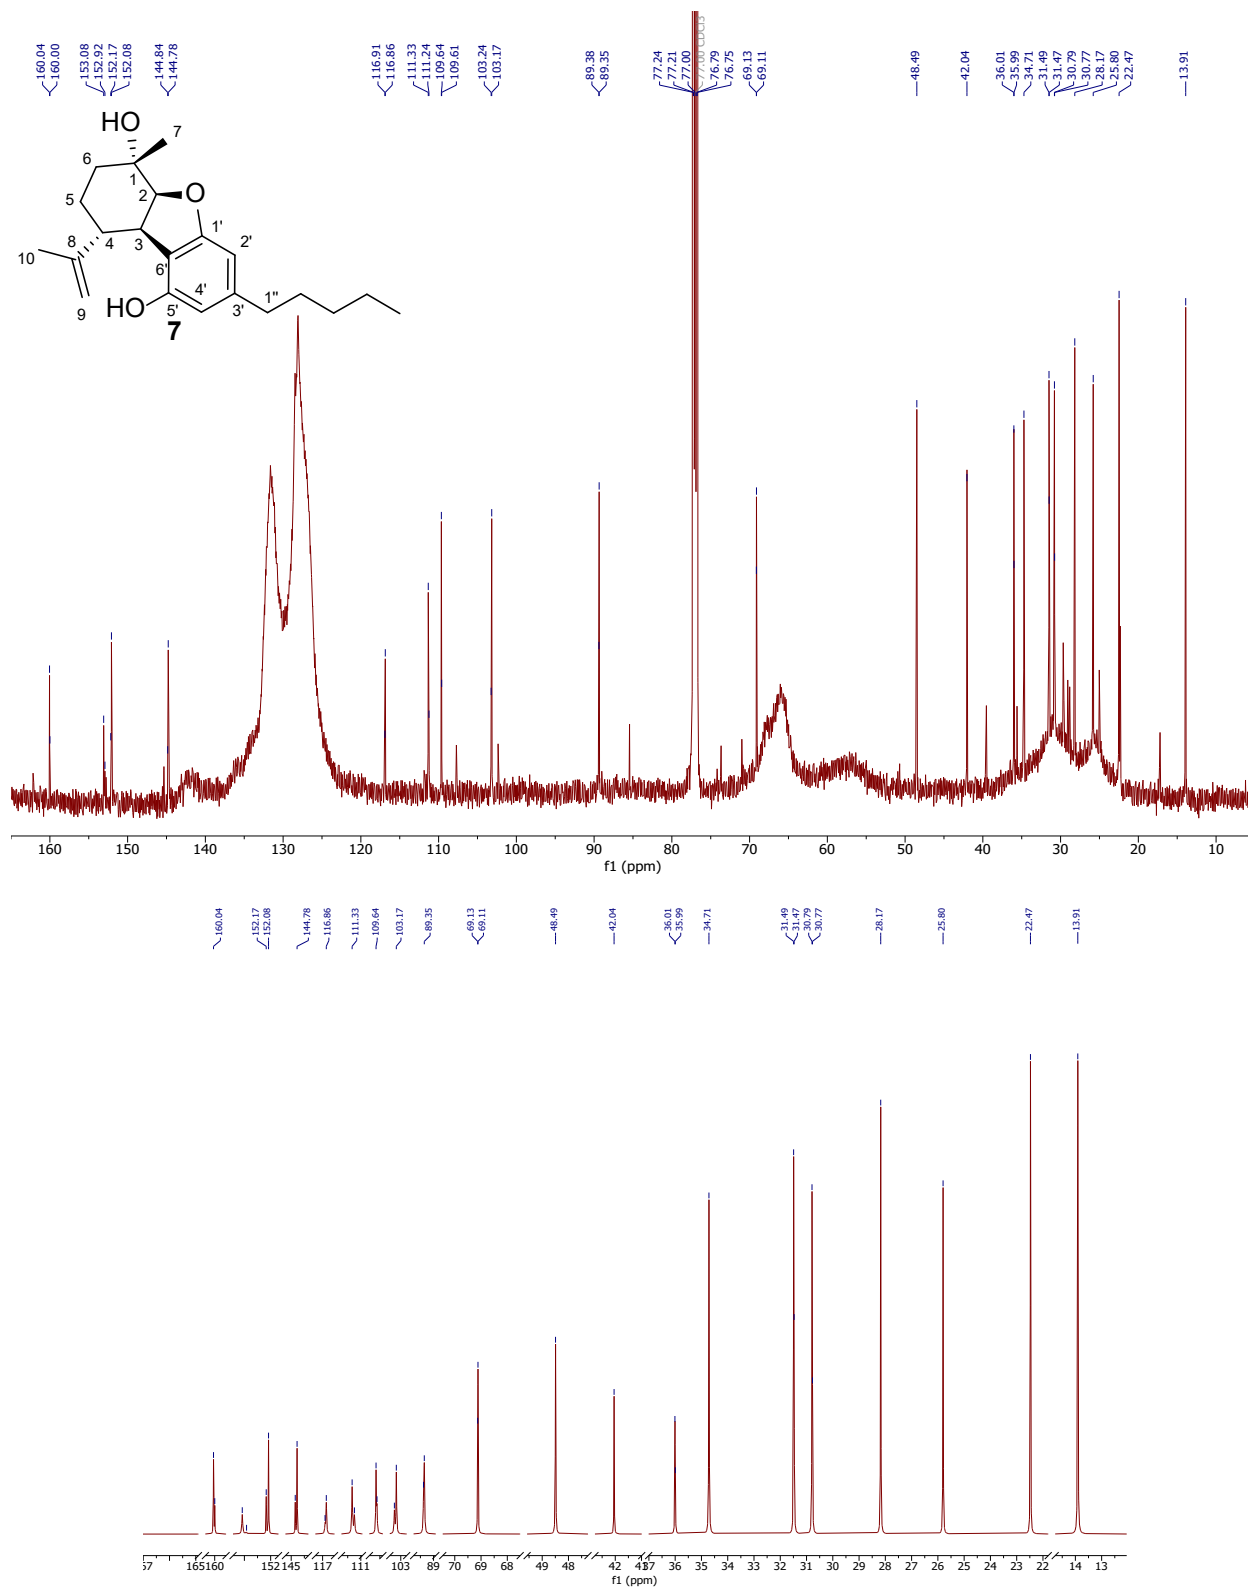

28. Numbering key for DFT and SVD calculations.

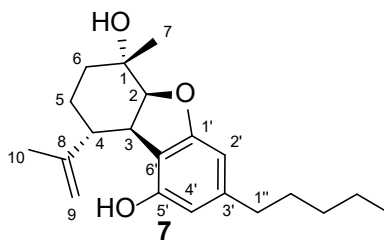

|                             | <b>CBE (7) &amp; Alternate CBE configuration at C1 (8)</b> | <b>1<i>R</i>,2<i>S</i>-CBD epoxide (5)</b> | <b>6-membered cyclic ether (9)</b> |
|-----------------------------|------------------------------------------------------------|--------------------------------------------|------------------------------------|
| <b>Literature Numbering</b> | <b>DFT numbering</b>                                       | <b>DFT numbering</b>                       | <b>DFT numbering</b>               |
| 1                           | 6                                                          | 6                                          | 6                                  |
| 2                           | 5                                                          | 5                                          | 5                                  |
| 3                           | 4                                                          | 4                                          | 4                                  |
| 4                           | 3                                                          | 3                                          | 3                                  |
| 5                           | 2                                                          | 2                                          | 2                                  |
| 6                           | 1                                                          | 1                                          | 1                                  |
| 7                           | 7                                                          | 7                                          | 7                                  |
| 8                           | 8                                                          | 14                                         | 8                                  |
| 9                           | 20                                                         | 15                                         | 18                                 |
| 10                          | 19                                                         | 16                                         | 19                                 |
| 1'                          | 11                                                         | 13                                         | 12                                 |
| 2'                          | 9                                                          | 8                                          | 9                                  |
| 3'                          | 10                                                         | 9                                          | 10                                 |
| 4'                          | 14                                                         | 10                                         | 15                                 |
| 5'                          | 13                                                         | 11                                         | 14                                 |
| 6'                          | 12                                                         | 12                                         | 13                                 |

29. MSPIN input files for (5) (all carbons). Values recorded as zero arise from unresolved isotropic/anisotropic NMR resonance pairs that preclude the accurate measurement of these small differences in NMR chemical shift.

```
rca_data {  
# carbon number then dmax-dmin in ppm!!!!  
9 -0.04565  
14 -0.16207  
11 0.08614  
13 0.06831  
8 0.04512  
15 -0.08978  
12 -0.03923  
10 0.07401  
5 0.02869  
6 0.00987  
#3 0.00000  
4 -0.01557  
1 0.00901  
#7 0.00000  
#2 0.00000  
16 0.03207  
}
```



30. MSPIN input files for **(7)** (all carbons). Values recorded as zero arise from unresolved isotropic/anisotropic NMR resonance pairs that preclude the accurate measurement of these small differences in NMR chemical shift.

```
rca_data {  
# carbon number then dmax-dmin in ppm!!!!  
10 -0.04565  
8 -0.16207  
11 0.08614  
13 0.06831  
9 0.04512  
20 -0.08978  
12 -0.03923  
14 0.07401  
5 0.02869  
6 0.00987  
#3 0.00000  
4 -0.01557  
1 0.00901  
#7 0.00000  
#2 0.00000  
19 0.03207  
}
```

31. MSPIN input files for **(8)** (all carbons). Values recorded as zero arise from unresolved isotropic/anisotropic NMR resonance pairs that preclude the accurate measurement of these small differences in NMR chemical shift.

```
rca_data {  
# carbon number then dmax-dmin in ppm!!!!  
10 -0.04565  
8 -0.16207  
11 0.08614  
13 0.06831  
9 0.04512  
20 -0.08978  
12 -0.03923  
14 0.07401  
5 0.02869  
6 0.00987  
#3 0.00000  
4 -0.01557  
1 0.00901  
#7 0.00000  
#2 0.00000  
19 0.03207  
}
```

32. MSPIN input files for **(9)** (all carbons). Values recorded as zero arise from unresolved isotropic/anisotropic NMR resonance pairs that preclude the accurate measurement of these small differences in NMR chemical shift.

```
rca_data {  
# carbon number then dmax-dmin in ppm!!!!  
10 -0.04565  
8 -0.16207  
12 0.08614  
14 0.06831  
9 0.04512  
#18 -0.08978  
13 -0.03923  
15 0.07401  
5 0.02869  
6 0.00987  
#3 0.00000  
4 -0.01557  
1 0.00901  
#7 0.00000  
#2 0.00000  
19 0.03207  
}
```

33. MSPIN output files for (5) using all carbons in the SVD analysis.

!\* MSpin-RDC Plugin \*!

\*\*\*\*\*

!\* Computation flags \*!

Method: SVD

Scaling mode: Hz

Field (T): 14.092

1H Larmor Frequency: 600

Scale QCSA with axial component: False

Include CSA gel shift (isotropic) correction: False

Optimize CSA gel shift (isotropic) correction scale: False

Estimate CSA gel shift (isotropic) correction scale: False

Gel Shift Correction Scale: 0.15

Single Tensor: True

Optimize populations: True

Grid search points: 16

Superimpose: False

Average methyl groups: True

Average methylene groups: False

Average phenyl groups: False

Bootstrapping: False

RDC Std. Error [ppm]: 1

CSA Std. Error [ppm]: 0.01

PCS Std. Error [ppm]: 0.01

DQ Std. Error [Hz]: 1

\*\*\*\*\*

!\* Permutations \*!

There are no permutations on the original data set

\*\*\*\*\*

Data set: #1

Computed data for frame #1

CSA Data:

| I   | Exp. [ppm] | Comp. [ppm] |
|-----|------------|-------------|
| C9  | -0.0457    | -0.0285     |
| C14 | -0.1621    | 0.0588      |
| C11 | 0.0861     | 0.0822      |
| C13 | 0.0683     | 0.0729      |
| C8  | 0.0451     | 0.0508      |
| C15 | -0.0898    | 0.1053      |
| C12 | -0.0392    | -0.0571     |
| C10 | 0.0740     | 0.0575      |
| C5  | 0.0287     | 0.0217      |
| C6  | 0.0099     | -0.0038     |
| C4  | -0.0156    | -0.0080     |
| C1  | 0.0090     | -0.0085     |
| C16 | 0.0321     | -0.0243     |

Cornilescu Quality factor (Q): 1.23716

Computed data for frame #2

CSA Data:

| I   | Exp. [ppm] | Comp. [ppm] |
|-----|------------|-------------|
| C9  | -0.0457    | -0.0198     |
| C14 | -0.1621    | -0.1424     |
| C11 | 0.0861     | 0.0843      |
| C13 | 0.0683     | 0.0823      |
| C8  | 0.0451     | 0.0597      |
| C15 | -0.0898    | -0.1240     |

|     |         |         |
|-----|---------|---------|
| C12 | -0.0392 | -0.0486 |
| C10 | 0.0740  | 0.0609  |
| C5  | 0.0287  | 0.0188  |
| C6  | 0.0099  | -0.0061 |
| C4  | -0.0156 | -0.0059 |
| C1  | 0.0090  | -0.0076 |
| C16 | 0.0321  | 0.0448  |

Cornilescu Quality factor (Q): 0.251422

Computed data for frame #3

CSA Data:

| I   | Exp. [ppm] | Comp. [ppm] |
|-----|------------|-------------|
| C9  | -0.0457    | -0.0426     |
| C14 | -0.1621    | -0.3379     |
| C11 | 0.0861     | 0.0629      |
| C13 | 0.0683     | 0.0359      |
| C8  | 0.0451     | 0.0390      |
| C15 | -0.0898    | -0.2223     |
| C12 | -0.0392    | -0.0746     |
| C10 | 0.0740     | 0.0364      |
| C5  | 0.0287     | 0.0210      |
| C6  | 0.0099     | -0.0052     |
| C4  | -0.0156    | -0.0139     |
| C1  | 0.0090     | -0.0088     |
| C16 | 0.0321     | 0.0711      |

Cornilescu Quality factor (Q): 0.957979

Computed data for frame #4

CSA Data:

| I   | Exp. [ppm] | Comp. [ppm] |
|-----|------------|-------------|
| C9  | -0.0457    | 0.0023      |
| C14 | -0.1621    | -0.0787     |
| C11 | 0.0861     | 0.1344      |
| C13 | 0.0683     | 0.1769      |
| C8  | 0.0451     | 0.0877      |
| C15 | -0.0898    | -0.0853     |
| C12 | -0.0392    | 0.0368      |
| C10 | 0.0740     | 0.1050      |
| C5  | 0.0287     | 0.0174      |
| C6  | 0.0099     | -0.0058     |
| C4  | -0.0156    | -0.0063     |
| C1  | 0.0090     | -0.0117     |
| C16 | 0.0321     | 0.0387      |

Cornilescu Quality factor (Q): 0.74154

Computed data for frame #5

CSA Data:

| I   | Exp. [ppm] | Comp. [ppm] |
|-----|------------|-------------|
| C9  | -0.0457    | 0.0177      |
| C14 | -0.1621    | 0.2931      |
| C11 | 0.0861     | 0.1751      |
| C13 | 0.0683     | 0.2144      |
| C8  | 0.0451     | 0.1184      |
| C15 | -0.0898    | 0.2300      |
| C12 | -0.0392    | 0.0553      |
| C10 | 0.0740     | 0.1324      |
| C5  | 0.0287     | 0.0227      |
| C6  | 0.0099     | -0.0039     |

|     |         |         |
|-----|---------|---------|
| C4  | -0.0156 | 0.0015  |
| C1  | 0.0090  | -0.0010 |
| C16 | 0.0321  | -0.0454 |

Cornilescu Quality factor (Q): 2.47715

Computed data for frame #6

CSA Data:

| I   | Exp. [ppm] | Comp. [ppm] |
|-----|------------|-------------|
| C9  | -0.0457    | 0.0415      |
| C14 | -0.1621    | 0.2137      |
| C11 | 0.0861     | 0.1824      |
| C13 | 0.0683     | 0.1746      |
| C8  | 0.0451     | 0.1169      |
| C15 | -0.0898    | 0.1913      |
| C12 | -0.0392    | -0.0038     |
| C10 | 0.0740     | 0.1426      |
| C5  | 0.0287     | 0.0439      |
| C6  | 0.0099     | 0.0177      |
| C4  | -0.0156    | 0.0163      |
| C1  | 0.0090     | -0.0124     |
| C16 | 0.0321     | -0.0354     |

Cornilescu Quality factor (Q): 2.1078

!Conformationally averaged data

!Populations

Frame #1: 15.4%

Frame #2: 0.0%

Frame #3: 66.4%



Frame #4: 0.0%

Frame #5: 18.2%

Frame #6: 0.0%

CSA Data:

| I   | Exp. [ppm] | Comp. [ppm] |
|-----|------------|-------------|
| C9  | -0.0457    | -0.0294     |
| C14 | -0.1621    | -0.1617     |
| C11 | 0.0861     | 0.0863      |
| C13 | 0.0683     | 0.0741      |
| C8  | 0.0451     | 0.0553      |
| C15 | -0.0898    | -0.0894     |
| C12 | -0.0392    | -0.0482     |
| C10 | 0.0740     | 0.0571      |
| C5  | 0.0287     | 0.0214      |
| C6  | 0.0099     | -0.0047     |
| C4  | -0.0156    | -0.0102     |
| C1  | 0.0090     | -0.0073     |
| C16 | 0.0321     | 0.0351      |

Cornilescu Quality factor (Q): 0.149457

Alignment tensor information:

A'x=-2.485e-04

A'y=-1.959e-03

A'z= 2.208e-03

Saupe tensor

S'x=-3.727e-04

S'y=-2.939e-03

S'z= 3.312e-03

Alignment tensor eigenvectors

$e[x] = (0.902, 0.398, 0.168)$

$e[y] = (0.031, 0.328, -0.944)$

$e[z] = (-0.431, 0.857, 0.283)$

Alignment tensor in laboratory coordinates:

$[2.059e-04, -9.239e-04, -2.504e-04]$

$[-9.239e-04, 1.371e-03, 1.126e-03]$

$[-2.504e-04, 1.126e-03, -1.576e-03]$

SVD condition number is  $2.761e+01$

Axial component  $A_a = 3.312e-03$

Rhombic component  $A_r = 1.711e-03$

Field = 14.09 Teslas [ 3.02]

rhombicity  $R = 0.517$

Asimmetry parameter  $\epsilon_{\theta} = 7.749e-01$

GDO =  $4.361e-03$

ZY'Z'' Euler Angles (degrees)

Set 1

(116.7, 73.5, -100.1)

Set 2

(-63.3, -73.5, 79.9)

\*\*\*\*\*

MSpin-RDC plugin Mon Feb 8 13:48:25 2021

34. MSPIN output files for (7) using all carbons in the SVD analysis.

!\* MSpin-RDC Plugin \*!

\*\*\*\*\*

!\* Computation flags \*!

Method: SVD

Scaling mode: Hz

Field (T): 14.092

1H Larmor Frequency: 600

Scale QCSA with axial component: False

Include CSA gel shift (isotropic) correction:False

Optimize CSA gel shift (isotropic) correction scale:False

Estimate CSA gel shift (isotropic) correction scale:False

Gel Shift Correction Scale: 0.15

Single Tensor: True

Optimize populations: True

Grid search points: 16

Superimpose: False

Average methyl groups: True

Average methylene groups: False

Average phenyl groups: False

Bootstrapping: False

RDC Std. Error [ppm]: 1

CSA Std. Error [ppm]: 0.01

PCS Std. Error [ppm]: 0.01

DQ Std. Error [Hz]: 1

\*\*\*\*\*

!\* Permutations \*!

There are no permutations on the original data set

\*\*\*\*\*

Data set: #1

Computed data for frame #1

CSA Data:

| I   | Exp. [ppm] | Comp. [ppm] |
|-----|------------|-------------|
| C10 | -0.0457    | -0.0453     |
| C8  | -0.1621    | 0.0080      |
| C11 | 0.0861     | 0.0956      |
| C13 | 0.0683     | 0.0810      |
| C9  | 0.0451     | 0.0408      |
| C20 | -0.0898    | 0.0729      |
| C12 | -0.0392    | -0.0397     |
| C14 | 0.0740     | 0.0777      |
| C5  | 0.0287     | 0.0093      |
| C6  | 0.0099     | 0.0082      |
| C4  | -0.0156    | -0.0001     |
| C1  | 0.0090     | 0.0146      |
| C19 | 0.0321     | -0.0135     |

Cornilescu Quality factor (Q): 0.988024

Computed data for frame #2

CSA Data:

| I   | Exp. [ppm] | Comp. [ppm] |
|-----|------------|-------------|
| C10 | -0.0457    | -0.0459     |
| C8  | -0.1621    | -0.3120     |
| C11 | 0.0861     | 0.0776      |
| C13 | 0.0683     | 0.0512      |
| C9  | 0.0451     | 0.0360      |
| C20 | -0.0898    | -0.2259     |
| C12 | -0.0392    | -0.0497     |

|     |         |         |
|-----|---------|---------|
| C14 | 0.0740  | 0.0686  |
| C5  | 0.0287  | 0.0096  |
| C6  | 0.0099  | 0.0158  |
| C4  | -0.0156 | -0.0248 |
| C1  | 0.0090  | 0.0137  |
| C19 | 0.0321  | 0.0667  |

Cornilescu Quality factor (Q): 0.850903

Computed data for frame #3

CSA Data:

| I   | Exp. [ppm] | Comp. [ppm] |
|-----|------------|-------------|
| C10 | -0.0457    | -0.0429     |
| C8  | -0.1621    | 0.0114      |
| C11 | 0.0861     | 0.0955      |
| C13 | 0.0683     | 0.0844      |
| C9  | 0.0451     | 0.0372      |
| C20 | -0.0898    | 0.0702      |
| C12 | -0.0392    | -0.0320     |
| C14 | 0.0740     | 0.0814      |
| C5  | 0.0287     | 0.0152      |
| C6  | 0.0099     | 0.0080      |
| C4  | -0.0156    | -0.0027     |
| C1  | 0.0090     | 0.0125      |
| C19 | 0.0321     | -0.0138     |

Cornilescu Quality factor (Q): 0.990363

Computed data for frame #4

CSA Data:

| I | Exp. [ppm] | Comp. [ppm] |
|---|------------|-------------|
|---|------------|-------------|

|     |         |         |
|-----|---------|---------|
| C10 | -0.0457 | -0.0472 |
| C8  | -0.1621 | 0.0029  |
| C11 | 0.0861  | 0.0953  |
| C13 | 0.0683  | 0.0824  |
| C9  | 0.0451  | 0.0382  |
| C20 | -0.0898 | 0.0713  |
| C12 | -0.0392 | -0.0369 |
| C14 | 0.0740  | 0.0807  |
| C5  | 0.0287  | 0.0174  |
| C6  | 0.0099  | 0.0116  |
| C4  | -0.0156 | -0.0006 |
| C1  | 0.0090  | 0.0101  |
| C19 | 0.0321  | -0.0131 |

Cornilescu Quality factor (Q): 0.967213

Computed data for frame #5

CSA Data:

| I   | Exp. [ppm] | Comp. [ppm] |
|-----|------------|-------------|
| C10 | -0.0457    | -0.0434     |
| C8  | -0.1621    | -0.3144     |
| C11 | 0.0861     | 0.0782      |
| C13 | 0.0683     | 0.0579      |
| C9  | 0.0451     | 0.0337      |
| C20 | -0.0898    | -0.2311     |
| C12 | -0.0392    | -0.0421     |
| C14 | 0.0740     | 0.0738      |
| C5  | 0.0287     | 0.0161      |
| C6  | 0.0099     | 0.0165      |
| C4  | -0.0156    | -0.0277     |

|     |        |        |
|-----|--------|--------|
| C1  | 0.0090 | 0.0107 |
| C19 | 0.0321 | 0.0671 |

Cornilescu Quality factor (Q): 0.86818

Computed data for frame #6

CSA Data:

| I   | Exp. [ppm] | Comp. [ppm] |
|-----|------------|-------------|
| C10 | -0.0457    | -0.0470     |
| C8  | -0.1621    | -0.3142     |
| C11 | 0.0861     | 0.0773      |
| C13 | 0.0683     | 0.0557      |
| C9  | 0.0451     | 0.0312      |
| C20 | -0.0898    | -0.2279     |
| C12 | -0.0392    | -0.0420     |
| C14 | 0.0740     | 0.0734      |
| C5  | 0.0287     | 0.0189      |
| C6  | 0.0099     | 0.0193      |
| C4  | -0.0156    | -0.0258     |
| C1  | 0.0090     | 0.0089      |
| C19 | 0.0321     | 0.0669      |

Cornilescu Quality factor (Q): 0.859246

!Conformationally averaged data

!Populations

Frame #1: 0.1%

Frame #2: 0.0%

Frame #3: 0.4%

Frame #4: 46.8%

Frame #5: 52.6%

Frame #6: 0.1%

CSA Data:

| I   | Exp. [ppm] | Comp. [ppm] |
|-----|------------|-------------|
| C10 | -0.0457    | -0.0452     |
| C8  | -0.1621    | -0.1643     |
| C11 | 0.0861     | 0.0863      |
| C13 | 0.0683     | 0.0695      |
| C9  | 0.0451     | 0.0358      |
| C20 | -0.0898    | -0.0881     |
| C12 | -0.0392    | -0.0396     |
| C14 | 0.0740     | 0.0771      |
| C5  | 0.0287     | 0.0167      |
| C6  | 0.0099     | 0.0141      |
| C4  | -0.0156    | -0.0149     |
| C1  | 0.0090     | 0.0105      |
| C19 | 0.0321     | 0.0292      |

Cornilescu Quality factor (Q): 0.0682985

Alignment tensor information:

A'x= 2.806e-04

A'y= 1.360e-03

A'z=-1.641e-03

Saupe tensor

S'x= 4.209e-04

S'y= 2.041e-03

S'z=-2.461e-03

Alignment tensor eigenvectors



$e[x]=(-0.333, 0.448, -0.829)$

$e[y]=(0.678, 0.725, 0.120)$

$e[z]=(0.655, -0.523, -0.546)$

Alignment tensor in laboratory coordinates:

$[-4.727e-05, 1.189e-03, 7.745e-04]$

$[1.189e-03, 3.234e-04, -4.543e-04]$

$[7.745e-04, -4.543e-04, -2.761e-04]$

SVD condition number is  $1.055e+01$

Axial component  $A_a = -2.461e-03$

Rhombic component  $A_r = -1.080e-03$

Field = 14.09 Teslas [ 3.02]

rhombicity  $R = 0.439$

Asymmetry parameter  $\eta_a = 6.580e-01$

GDO =  $3.135e-03$

ZY'Z'' Euler Angles (degrees)

Set 1

$(-38.6, 123.1, 8.2)$

Set 2

$(141.4, -123.1, -171.8)$

\*\*\*\*\*

MSpin-RDC plugin Wed Feb 3 15:26:06 2021

35. MSPIN output files for (8) using all carbons in the SVD analysis.

!\* MSpin-RDC Plugin \*!

\*\*\*\*\*

!\* Computation flags \*!

Method: SVD

Scaling mode: Hz

Field (T): 14.092

1H Larmor Frequency: 600

Scale QCSA with axial component: False

Include CSA gel shift (isotropic) correction:False

Optimize CSA gel shift (isotropic) correction scale:False

Estimate CSA gel shift (isotropic) correction scale:False

Gel Shift Correction Scale: 0.15

Single Tensor: True

Optimize populations: True

Grid search points: 16

Superimpose: False

Average methyl groups: True

Average methylene groups: False

Average phenyl groups: False

Bootstrapping: False

RDC Std. Error [ppm]: 1

CSA Std. Error [ppm]: 0.01

PCS Std. Error [ppm]: 0.01

DQ Std. Error [Hz]: 1

\*\*\*\*\*

!\* Permutations \*!

There are no permutations on the original data set

\*\*\*\*\*

Data set: #1

Computed data for frame #1

CSA Data:

| I   | Exp. [ppm] | Comp. [ppm] |
|-----|------------|-------------|
| C10 | -0.0457    | -0.1451     |
| C8  | -0.1621    | -0.0557     |
| C11 | 0.0861     | 0.0345      |
| C13 | 0.0683     | 0.0456      |
| C9  | 0.0451     | 0.0109      |
| C20 | -0.0898    | 0.0082      |
| C12 | -0.0392    | -0.1284     |
| C14 | 0.0740     | 0.0164      |
| C5  | 0.0287     | -0.0811     |
| C6  | 0.0099     | 0.0522      |
| C4  | -0.0156    | -0.0050     |
| C1  | 0.0090     | -0.0330     |
| C19 | 0.0321     | -0.0102     |

Cornilescu Quality factor (Q): 1.03373

Computed data for frame #2

CSA Data:

| I   | Exp. [ppm] | Comp. [ppm] |
|-----|------------|-------------|
| C10 | -0.0457    | -0.1343     |
| C8  | -0.1621    | -0.2834     |
| C11 | 0.0861     | 0.0329      |
| C13 | 0.0683     | 0.0418      |
| C9  | 0.0451     | 0.0151      |
| C20 | -0.0898    | -0.2070     |
| C12 | -0.0392    | -0.1124     |

|     |         |         |
|-----|---------|---------|
| C14 | 0.0740  | 0.0254  |
| C5  | 0.0287  | -0.0749 |
| C6  | 0.0099  | 0.0503  |
| C4  | -0.0156 | -0.0197 |
| C1  | 0.0090  | -0.0313 |
| C19 | 0.0321  | 0.0538  |

Cornilescu Quality factor (Q): 1.02577

Computed data for frame #3

CSA Data:

| I   | Exp. [ppm] | Comp. [ppm] |
|-----|------------|-------------|
| C10 | -0.0457    | -0.0825     |
| C8  | -0.1621    | -0.3733     |
| C11 | 0.0861     | 0.0741      |
| C13 | 0.0683     | 0.0781      |
| C9  | 0.0451     | 0.0391      |
| C20 | -0.0898    | -0.2813     |
| C12 | -0.0392    | -0.0670     |
| C14 | 0.0740     | 0.0565      |
| C5  | 0.0287     | -0.0317     |
| C6  | 0.0099     | 0.0376      |
| C4  | -0.0156    | -0.0107     |
| C1  | 0.0090     | -0.0128     |
| C19 | 0.0321     | 0.0722      |

Cornilescu Quality factor (Q): 1.23005

Computed data for frame #4

CSA Data:

| I | Exp. [ppm] | Comp. [ppm] |
|---|------------|-------------|
|---|------------|-------------|

|     |         |         |
|-----|---------|---------|
| C10 | -0.0457 | -0.0999 |
| C8  | -0.1621 | -0.0755 |
| C11 | 0.0861  | 0.0758  |
| C13 | 0.0683  | 0.0807  |
| C9  | 0.0451  | 0.0360  |
| C20 | -0.0898 | 0.0126  |
| C12 | -0.0392 | -0.0915 |
| C14 | 0.0740  | 0.0494  |
| C5  | 0.0287  | -0.0410 |
| C6  | 0.0099  | 0.0423  |
| C4  | -0.0156 | 0.0066  |
| C1  | 0.0090  | -0.0117 |
| C19 | 0.0321  | -0.0086 |

Cornilescu Quality factor (Q): 0.743882

Computed data for frame #5

CSA Data:

| I   | Exp. [ppm] | Comp. [ppm] |
|-----|------------|-------------|
| C10 | -0.0457    | -0.0414     |
| C8  | -0.1621    | -0.0200     |
| C11 | 0.0861     | 0.0889      |
| C13 | 0.0683     | 0.0720      |
| C9  | 0.0451     | 0.0337      |
| C20 | -0.0898    | 0.0561      |
| C12 | -0.0392    | -0.0356     |
| C14 | 0.0740     | 0.0724      |
| C5  | 0.0287     | 0.0240      |
| C6  | 0.0099     | -0.0143     |
| C4  | -0.0156    | -0.0034     |

C1 0.0090 0.0101  
C19 0.0321 -0.0090

Cornilescu Quality factor (Q): 0.858804

Computed data for frame #6

CSA Data:

| I   | Exp. [ppm] | Comp. [ppm] |
|-----|------------|-------------|
| C10 | -0.0457    | -0.0300     |
| C8  | -0.1621    | -0.3391     |
| C11 | 0.0861     | 0.0831      |
| C13 | 0.0683     | 0.0672      |
| C9  | 0.0451     | 0.0409      |
| C20 | -0.0898    | -0.2335     |
| C12 | -0.0392    | -0.0303     |
| C14 | 0.0740     | 0.0763      |
| C5  | 0.0287     | 0.0189      |
| C6  | 0.0099     | -0.0135     |
| C4  | -0.0156    | -0.0259     |
| C1  | 0.0090     | 0.0106      |
| C19 | 0.0321     | 0.0705      |

Cornilescu Quality factor (Q): 0.954991

!Conformationally averaged data

!Populations

Frame #1: 0.0%

Frame #2: 0.0%

Frame #3: 15.3%

Frame #4: 0.0%

Frame #5: 54.6%

Frame #6: 30.1%

CSA Data:

| I   | Exp. [ppm] | Comp. [ppm] |
|-----|------------|-------------|
| C10 | -0.0457    | -0.0443     |
| C8  | -0.1621    | -0.1701     |
| C11 | 0.0861     | 0.0849      |
| C13 | 0.0683     | 0.0715      |
| C9  | 0.0451     | 0.0367      |
| C20 | -0.0898    | -0.0826     |
| C12 | -0.0392    | -0.0388     |
| C14 | 0.0740     | 0.0711      |
| C5  | 0.0287     | 0.0139      |
| C6  | 0.0099     | -0.0061     |
| C4  | -0.0156    | -0.0113     |
| C1  | 0.0090     | 0.0068      |
| C19 | 0.0321     | 0.0273      |

Cornilescu Quality factor (Q): 0.110241

Alignment tensor information:

A'x= 2.608e-04

A'y= 1.469e-03

A'z=-1.729e-03

Saupe tensor

S'x= 3.912e-04

S'y= 2.203e-03

S'z=-2.594e-03

Alignment tensor eigenvectors

$e[x] = (0.168, -0.563, 0.809)$

$e[y] = (0.860, 0.485, 0.159)$

$e[z] = (-0.482, 0.669, 0.566)$

Alignment tensor in laboratory coordinates:

[ 6.921e-04, 1.145e-03, 7.072e-04]

[ 1.145e-03, -3.462e-04, -6.606e-04]

[ 7.072e-04, -6.606e-04, -3.459e-04]

SVD condition number is 1.143e+01

Axial component  $A_a = -2.594e-03$

Rhombic component  $A_r = -1.208e-03$

Field = 14.09 Teslas [ 3.02]

rhombicity  $R = 0.466$

Asymmetry parameter  $\eta = 6.984e-01$

GDO = 3.341e-03

ZY'Z'' Euler Angles (degrees)

Set 1

(125.8, 55.5, 168.9)

Set 2

(-54.2, -55.5, -11.1)

\*\*\*\*\*

MSpin-RDC plugin Wed Feb 3 15:29:12 2021



36. MSPIN output files for (9) using all carbons in the SVD analysis.

!\* MSpin-RDC Plugin \*!

\*\*\*\*\*

!\* Computation flags \*!

Method: SVD

Scaling mode: Hz

Field (T): 14.092

1H Larmor Frequency: 600

Scale QCSA with axial component: False

Include CSA gel shift (isotropic) correction: False

Optimize CSA gel shift (isotropic) correction scale: False

Estimate CSA gel shift (isotropic) correction scale: False

Gel Shift Correction Scale: 0.15

Single Tensor: True

Optimize populations: True

Grid search points: 16

Superimpose: False

Average methyl groups: True

Average methylene groups: False

Average phenyl groups: False

Bootstrapping: False

RDC Std. Error [ppm]: 1

CSA Std. Error [ppm]: 0.01

PCS Std. Error [ppm]: 0.01

DQ Std. Error [Hz]: 1

\*\*\*\*\*

!\* Permutations \*!

There are no permutations on the original data set

\*\*\*\*\*

Data set: #1

Computed data for frame #1

CSA Data:

| I   | Exp. [ppm] | Comp. [ppm] |
|-----|------------|-------------|
| C10 | -0.0457    | -0.0423     |
| C8  | -0.1621    | -0.1607     |
| C12 | 0.0861     | 0.0921      |
| C14 | 0.0683     | 0.0499      |
| C9  | 0.0451     | 0.0292      |
| C13 | -0.0392    | -0.0208     |
| C15 | 0.0740     | 0.0981      |
| C5  | 0.0287     | 0.0123      |
| C6  | 0.0099     | -0.0303     |
| C4  | -0.0156    | -0.0088     |
| C1  | 0.0090     | -0.0032     |
| C19 | 0.0321     | 0.0127      |

Cornilescu Quality factor(Q): 0.278406

Computed data for frame #2

CSA Data:

| I   | Exp. [ppm] | Comp. [ppm] |
|-----|------------|-------------|
| C10 | -0.0457    | -0.0425     |
| C8  | -0.1621    | -0.1490     |
| C12 | 0.0861     | 0.0973      |
| C14 | 0.0683     | 0.0416      |
| C9  | 0.0451     | 0.0352      |
| C13 | -0.0392    | -0.0281     |
| C15 | 0.0740     | 0.0625      |

|     |         |         |
|-----|---------|---------|
| C5  | 0.0287  | 0.0089  |
| C6  | 0.0099  | -0.0314 |
| C4  | -0.0156 | -0.0061 |
| C1  | 0.0090  | -0.0050 |
| C19 | 0.0321  | 0.0107  |

Cornilescu Quality factor (Q): 0.28509

Computed data for frame #3

CSA Data:

| I   | Exp. [ppm] | Comp. [ppm] |
|-----|------------|-------------|
| C10 | -0.0457    | -0.0416     |
| C8  | -0.1621    | -0.1605     |
| C12 | 0.0861     | 0.0933      |
| C14 | 0.0683     | 0.0488      |
| C9  | 0.0451     | 0.0312      |
| C13 | -0.0392    | -0.0264     |
| C15 | 0.0740     | 0.0825      |
| C5  | 0.0287     | 0.0117      |
| C6  | 0.0099     | -0.0307     |
| C4  | -0.0156    | -0.0088     |
| C1  | 0.0090     | -0.0033     |
| C19 | 0.0321     | 0.0128      |

Cornilescu Quality factor (Q): 0.255772

Computed data for frame #4

CSA Data:

| I   | Exp. [ppm] | Comp. [ppm] |
|-----|------------|-------------|
| C10 | -0.0457    | -0.0740     |
| C8  | -0.1621    | -0.2018     |

|     |         |         |
|-----|---------|---------|
| C12 | 0.0861  | 0.0677  |
| C14 | 0.0683  | 0.0247  |
| C9  | 0.0451  | 0.0019  |
| C13 | -0.0392 | -0.0486 |
| C15 | 0.0740  | 0.0767  |
| C5  | 0.0287  | 0.0054  |
| C6  | 0.0099  | -0.0458 |
| C4  | -0.0156 | -0.0115 |
| C1  | 0.0090  | -0.0039 |
| C19 | 0.0321  | 0.0298  |

Cornilescu Quality factor (Q): 0.448838

!Conformationally averaged data

!Populations

Frame #1: 0.0%

Frame #2: 0.0%

Frame #3: 100.0%

Frame #4: 0.0%

CSA Data:

| I   | Exp. [ppm] | Comp. [ppm] |
|-----|------------|-------------|
| C10 | -0.0457    | -0.0416     |
| C8  | -0.1621    | -0.1605     |
| C12 | 0.0861     | 0.0933      |
| C14 | 0.0683     | 0.0488      |
| C9  | 0.0451     | 0.0312      |
| C13 | -0.0392    | -0.0264     |
| C15 | 0.0740     | 0.0825      |

C5 0.0287 0.0117  
C6 0.0099 -0.0307  
C4 -0.0156 -0.0088  
C1 0.0090 -0.0033  
C19 0.0321 0.0128

Cornilescu Quality factor (Q): 0.255772

Alignment tensor information:

A'x= 8.934e-04

A'y= 1.910e-03

A'z=-2.803e-03

Saupe tensor

S'x= 1.340e-03

S'y= 2.865e-03

S'z=-4.205e-03

Alignment tensor eigenvectors

e[x]=( 0.683, 0.660, 0.314)

e[y]=( 0.299,-0.645, 0.703)

e[z]=( 0.667,-0.386,-0.638)

Alignment tensor in laboratory coordinates:

[-6.582e-04,7.547e-04,1.786e-03]

[ 7.547e-04,7.655e-04,-1.371e-03]

[ 1.786e-03,-1.371e-03,-1.073e-04]

SVD condition number is 1.480e+01

Axial component Aa = -4.205e-03

Rhombic component Ar = -1.017e-03

Field=14.09 Teslas[ 3.02]

rhombicity  $R = 0.242$

Asimmetry parameter  $\text{etha} = 3.626e-01$

GDO =  $5.013e-03$

ZY'Z'' Euler Angles (degrees)

Set 1

(-30.1,129.6,114.1)

Set 2

(149.9,-129.6,-65.9)

\*\*\*\*\*

MSpin-RDC plugin Wed Feb 3 15:32:47 2021

37. Table and bar graph of  $Q$ -factor determined from SVD for structures (5), (7), (8), and (9).

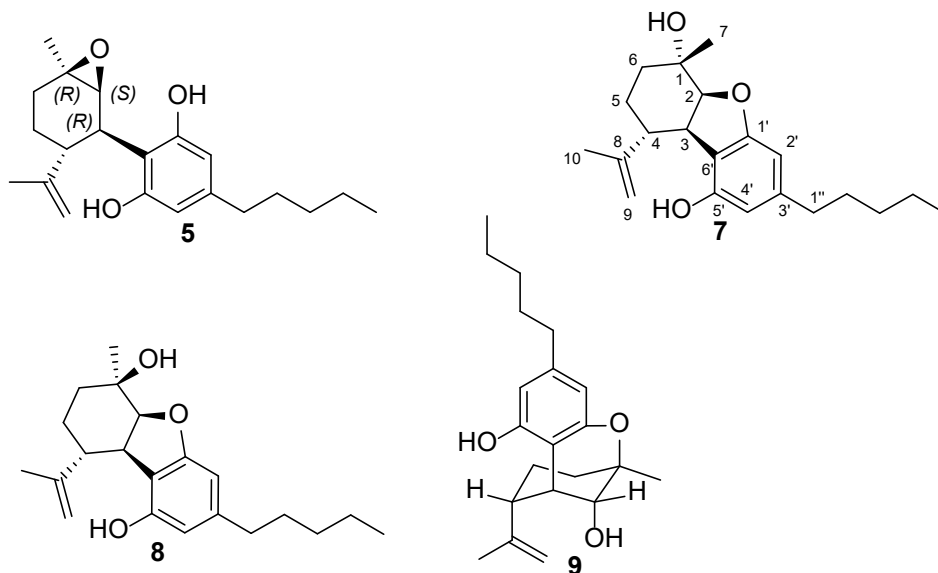

| Structure               | 5     | 7     | 8     | 9     |
|-------------------------|-------|-------|-------|-------|
| SVD $Q_{\text{factor}}$ | 0.149 | 0.068 | 0.110 | 0.256 |

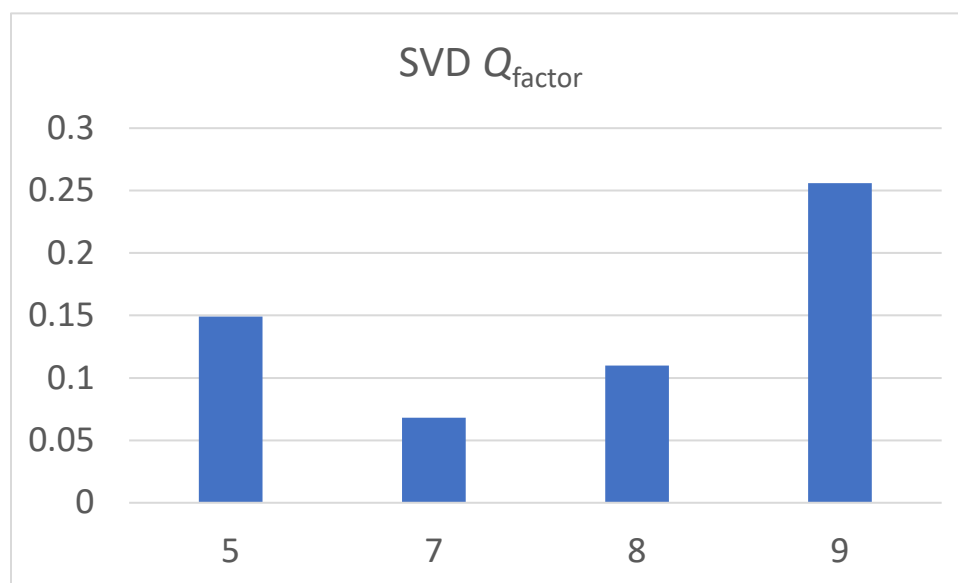

38. Experimental for synthesis of 1*R*,2*S*-CBD epoxide (**5**).

A dry 2-dram vial was charged with 62.9 mg (0.2 mmol) of cannabidiol (**2**, >95% CBD) and a Teflon stir bar. Potassium bicarbonate (20.0 mg, 0.2 mmol) was added, followed by 1.0 mL of methanol to form a suspension under argon. Benzonitrile (31  $\mu$ L, 0.3 mmol) and 30% hydrogen peroxide (30  $\mu$ L, 0.3 mmol) were added sequentially by syringe. The reaction was stirred for 40 hours under argon. After this time, the suspension was filtered with additional methanol wash. The resulting filtrate was concentrated to dryness. The mixture was purified by silica gel chromatography ramping from 0-20% ethyl acetate in hexanes over 10 minutes to give 28.5 mg (43% yield) of 1*R*,2*S*-CBD epoxide (**5**) as a clear film. HRMS–ESI (*m/z*): [M]<sup>+</sup> calculated for C<sub>21</sub>H<sub>31</sub>O<sub>2</sub>, 331.2273; found, 331.2270 (-0.9 ppm).



39. 1D  $^1\text{H}$  NMR data (600.1 MHz) for 1*R*,2*S*-CBD epoxide (**5**) in  $\text{CDCl}_3$ .

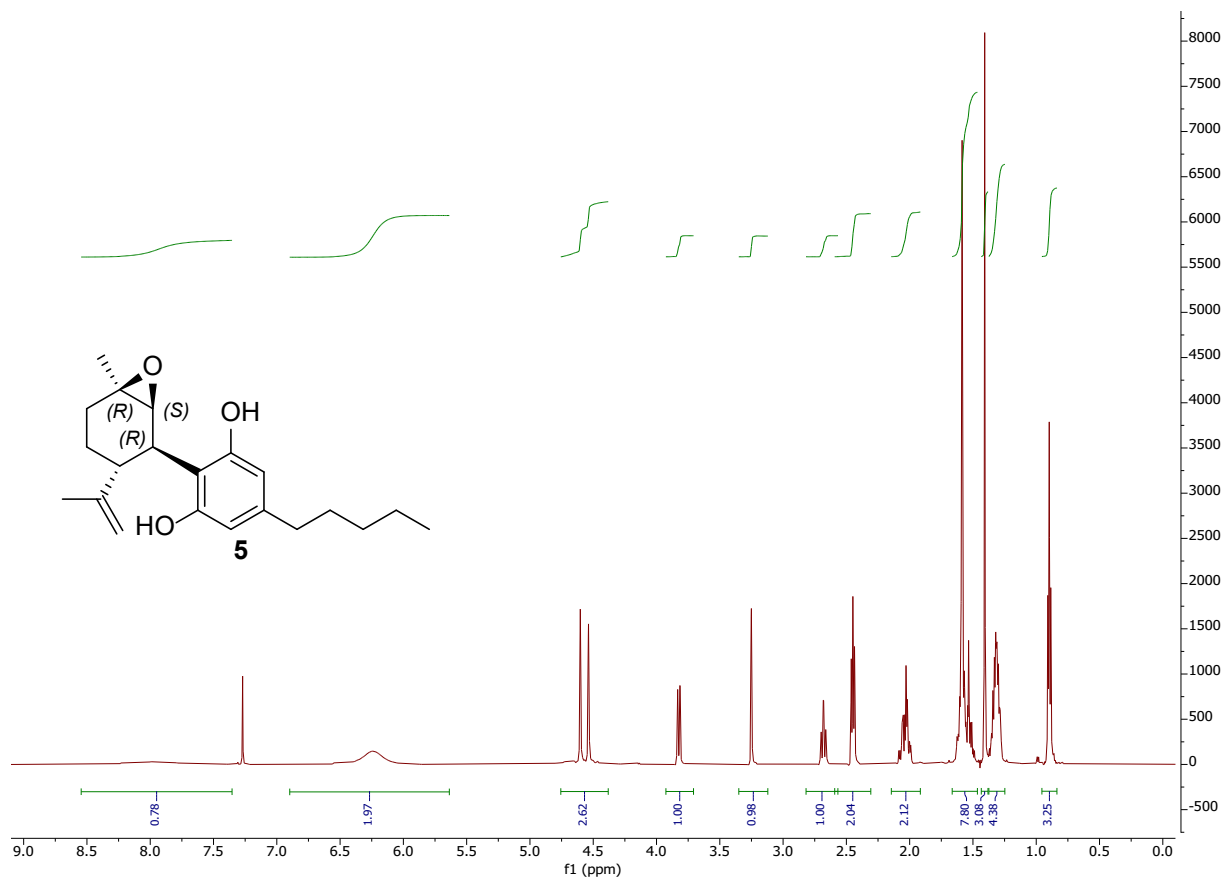

40. 1D  $^{13}\text{C}$  NMR data (150.9 MHz) for 1*R*,2*S*-CBD epoxide (**5**) in  $\text{CDCl}_3$ .

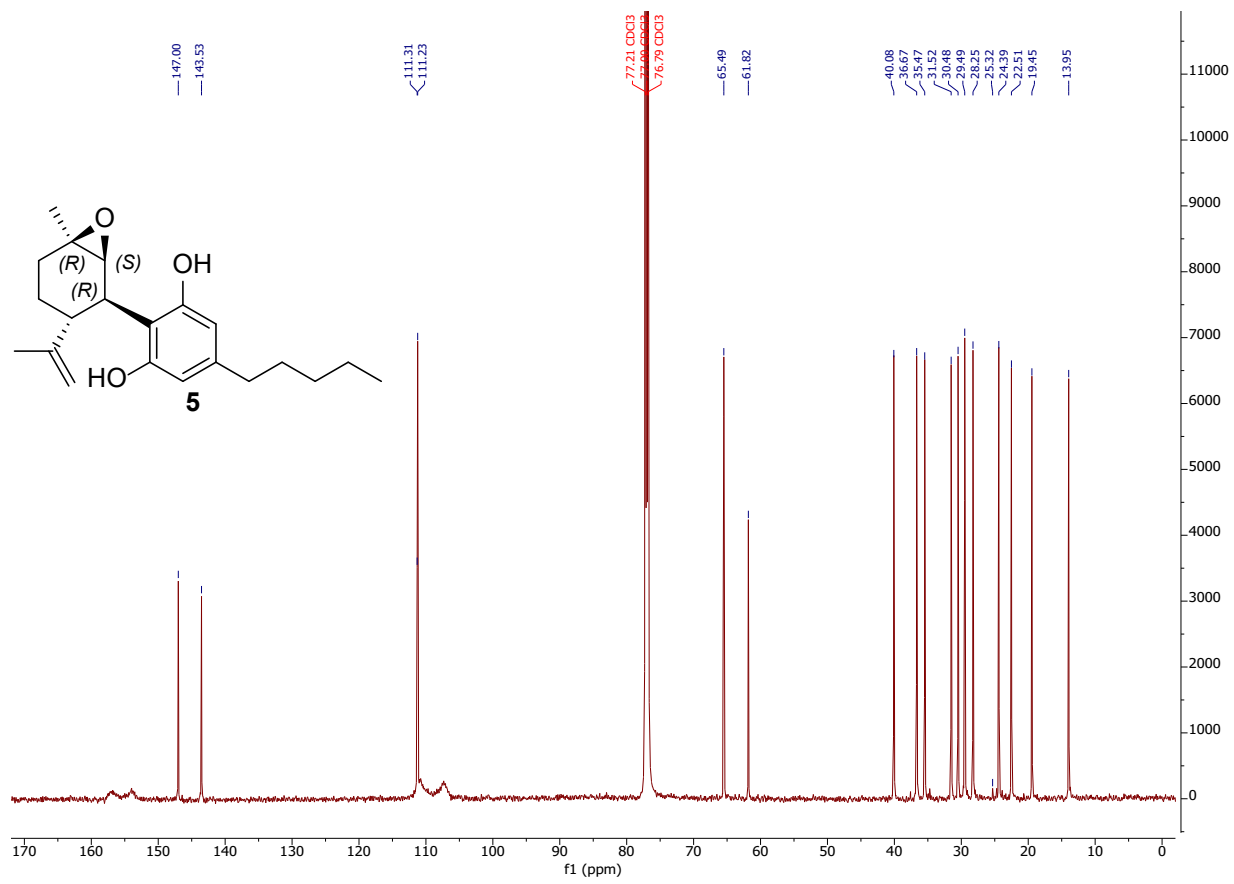

41.  $^1\text{H}$ - $^1\text{H}$  COSY data (600.1 MHz) for 1*R*,2*S*-CBD epoxide (**5**).

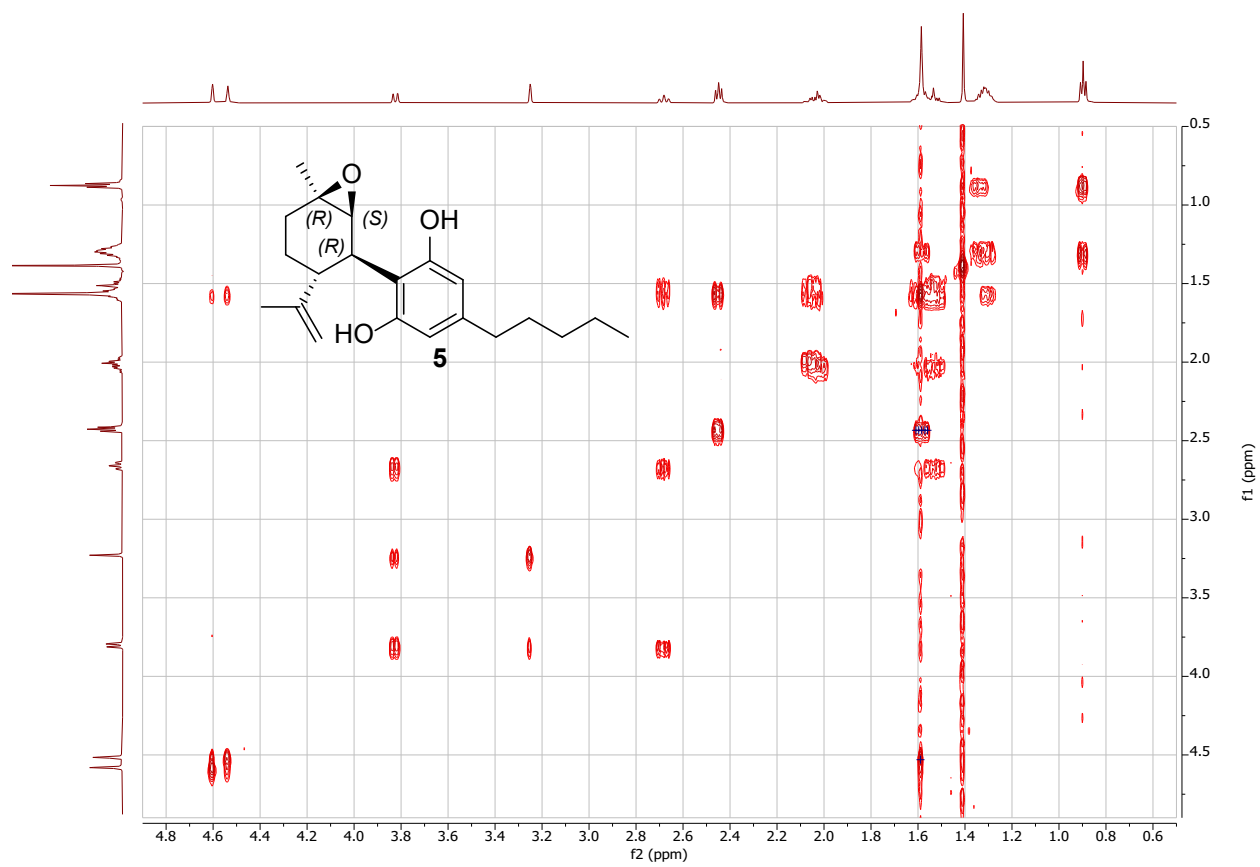

42.  $^1\text{H}$ - $^{13}\text{C}$  Multiplicity-edited HSQC data (600.1 MHz) for 1*R*,2*S*-CBD epoxide (**5**).

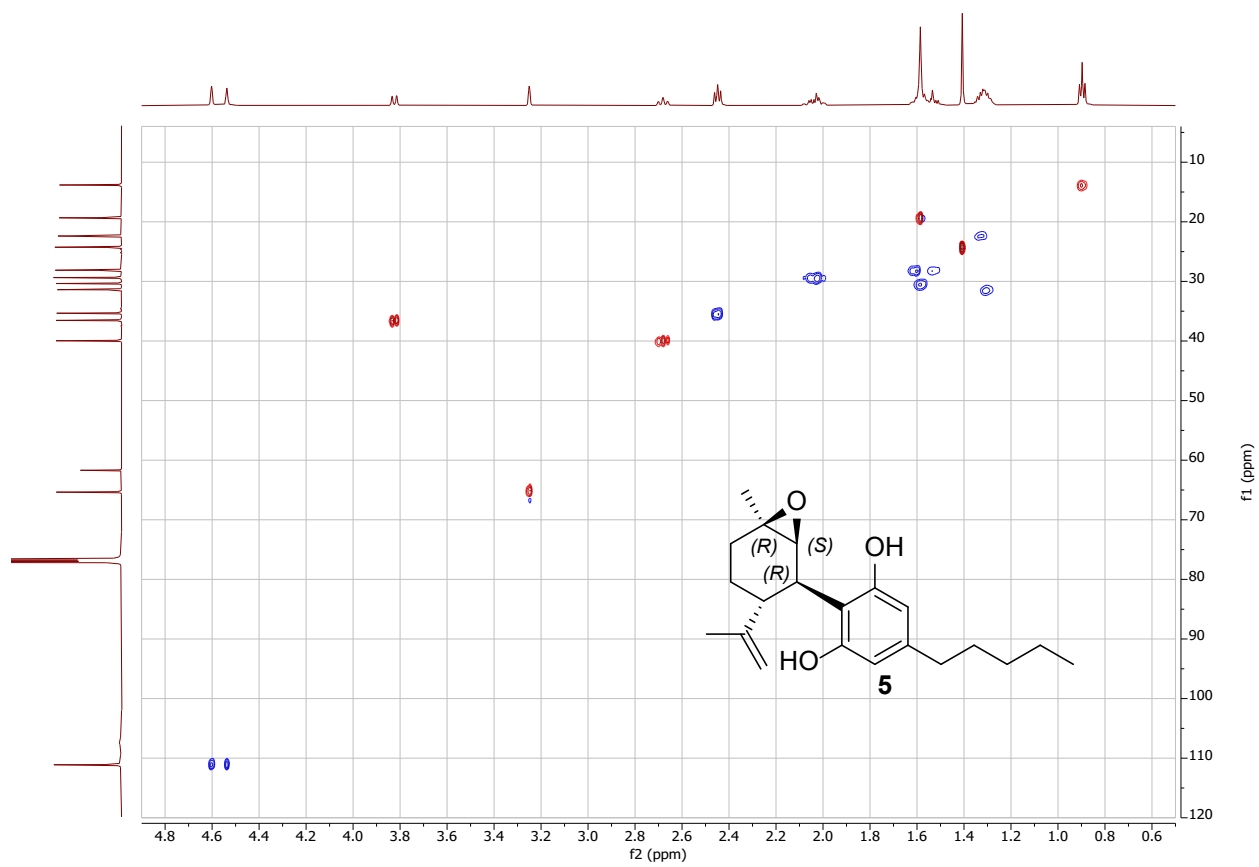

43. 8 Hz Optimized  $^1\text{H}$ - $^{13}\text{C}$  HMBC data (600.1 MHz) for 1*R*,2*S*-CBD epoxide (**5**).

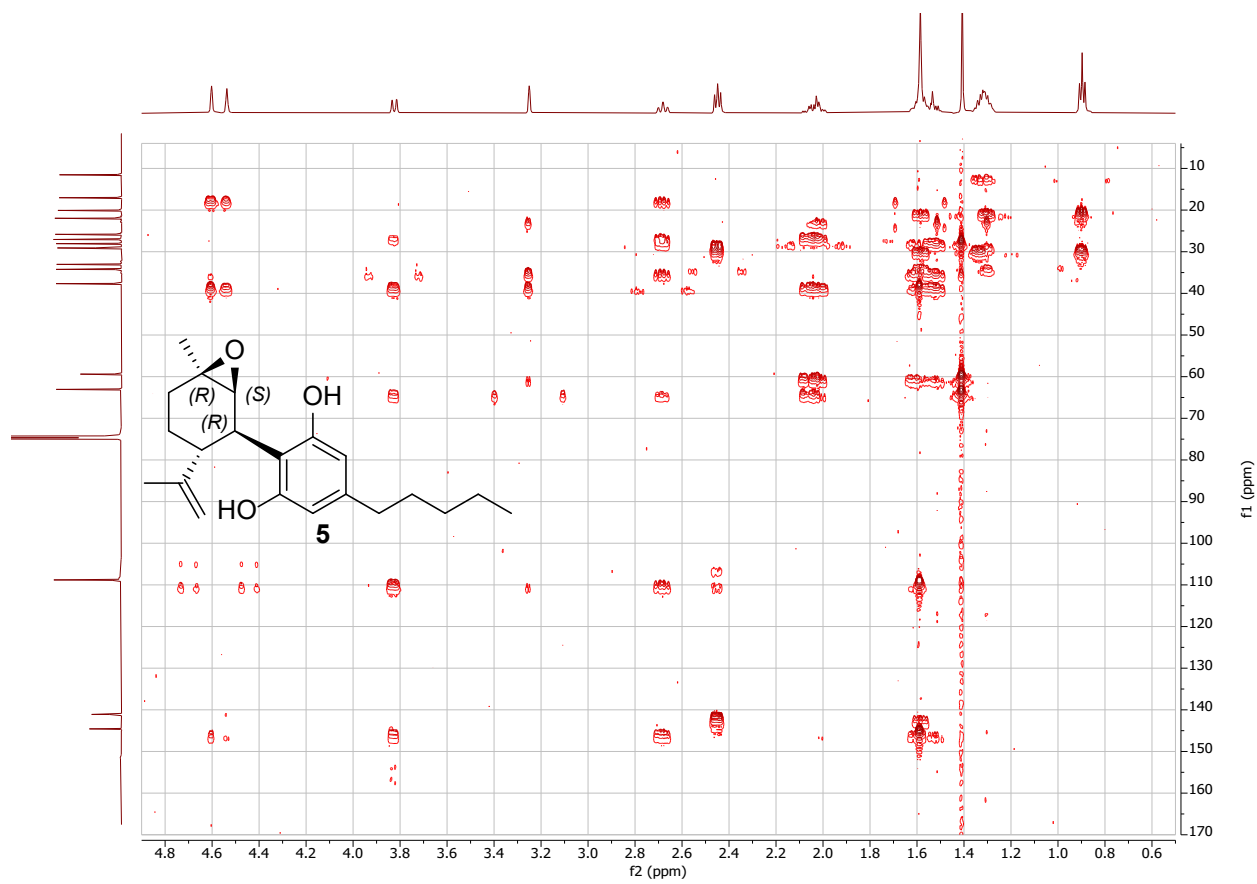

44.  $^1\text{H}$ - $^1\text{H}$  ROESY data (600.1 MHz, 300 ms) for 1*R*,2*S*-CBD epoxide (**5**).

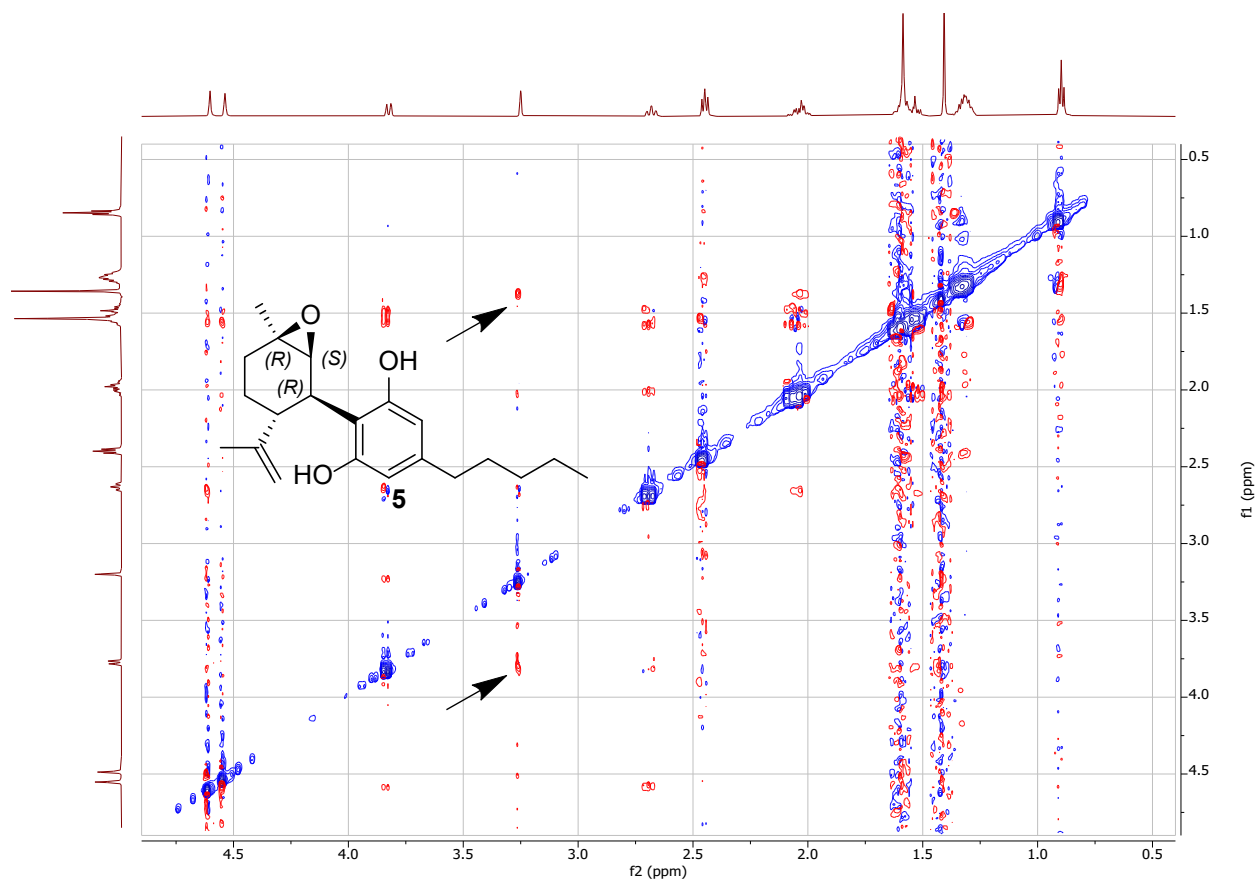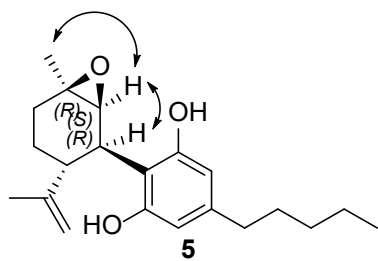

ROESY Correlations Define Relative Configuration

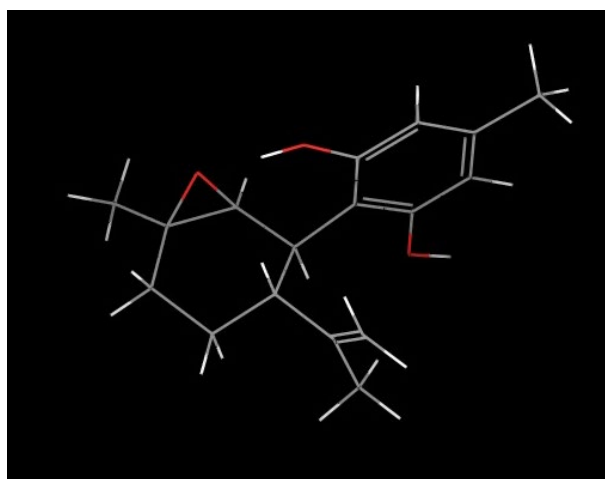

1*R*,2*S*-CBD epoxide (**5**) Conformation 1

45. Table of NMR assignments for 1*R*,2*S*-CBD epoxide (**5**).

| Carbon # | <sup>1</sup> H δ, ppm, multiplicity ( <i>J</i> Hz) | <sup>13</sup> C δ, multiplicity | HMBC Correlations                 |
|----------|----------------------------------------------------|---------------------------------|-----------------------------------|
| 1        |                                                    | 61.8 C                          |                                   |
| 2        | 3.25 d (2.0)                                       | 65.5 CH                         | C1, C3, C4, C7, C6'               |
| 3        | 3.82 dd (11.5, 2.1)                                | 36.7 CH                         | C1, C2, C4, C5, C8, C1', C5', C6' |
| 4        | 2.68 td (11.9, 2.7)                                | 40.1 CH                         | C2, C3, C5, C6, C8, C9, C10, C6'  |
| 5        | 1.61 m, 1.54 m                                     | 28.3 CH <sub>2</sub>            | C1, C3, C4, C6, C8                |
| 6        | 2.05 m, 2.01 m                                     | 29.5 CH <sub>2</sub>            | C1, C2, C3, C4, C5, C7            |
| 7        | 1.41 s                                             | 24.4 CH <sub>3</sub>            | C1, C2, C6                        |
| 8        |                                                    | 147.0 C                         |                                   |
| 9        | 4.54 s, 4.60 s                                     | 111.0 CH <sub>2</sub>           | C4, C8, C10                       |
| 10       | 1.61 s                                             | 19.5 CH <sub>3</sub>            | C4, C8, C9                        |
|          |                                                    |                                 |                                   |
| 1'       |                                                    | 156.7 C                         |                                   |
| 2'       | 6.24 broad s                                       | 107.3 CH                        | None Observed                     |
| 3'       |                                                    | 143.5 C                         |                                   |
| 4'       | 6.24 broad s                                       | 107.3 CH                        | None Observed                     |
| 5'       |                                                    | 154.0 C                         |                                   |
| 6'       |                                                    | 110.8 C                         |                                   |
|          |                                                    |                                 |                                   |
| 1''      | 2.45 t (7.8)                                       | 35.5 CH <sub>2</sub>            | C2', C3', C4', C2'', C3''         |
| 2''      | 1.58 m                                             | 30.5 CH <sub>2</sub>            | C3', C1'', C3'', C4''             |
| 3''      | 1.31 m                                             | 31.6 CH <sub>2</sub>            | C1'', C2'', C4'', C5''            |
| 4''      | 1.33 m                                             | 22.5 CH <sub>2</sub>            | C2'', C3'', C5''                  |
| 5''      | 0.90 t (6.9)                                       | 14.3 CH <sub>3</sub>            | C3'', 4''                         |
|          |                                                    |                                 |                                   |
| OH       | 7.94 bs                                            |                                 | None Observed                     |

46. Experimental for synthesis of 1*S*,2*R*-CBD epoxide diacetate (**11**).

A dry 2-dram vial was charged with 39.8 mg (0.1 mmol) of CBD diacetate (**10**) and a Teflon stir bar. Sodium bicarbonate (25.2 mg, 0.3 mmol) was added, followed by 1.0 mL dichloromethane to form a suspension under argon. After cooling the reaction mixture to 0 °C, 25.3 mg of *m*-chloroperbenzoic acid (75% purity, 0.11 mmol) was added all at once. The reaction was stirred for 1 hour at 0 °C under argon. After this time, 1.0 mL of 10% aqueous Na<sub>2</sub>S<sub>2</sub>O<sub>3</sub> was added, and the suspension was warmed to room temperature. The mixture was extracted with 2 x 2 mL of dichloromethane. The combined organic layer was dried over MgSO<sub>4</sub>, filtered, and concentrated. The mixture was purified by silica gel chromatography ramping from 0-20% ethyl acetate in hexanes over 10 minutes to give 17.5 mg (42% yield) of 1*S*,2*R*-CBD epoxide diacetate (**11**) as a clear film. HRMS–ESI (m/z): [M]<sup>+</sup> calculated for C<sub>25</sub>H<sub>34</sub>O<sub>5</sub>Na, 437.2304; found, 437.2300 (-0.9 ppm).



47. 1D  $^1\text{H}$  NMR data (600.1 MHz) for 1*S*,2*R*-CBD epoxide diacetate (**11**) in  $\text{CDCl}_3$ .

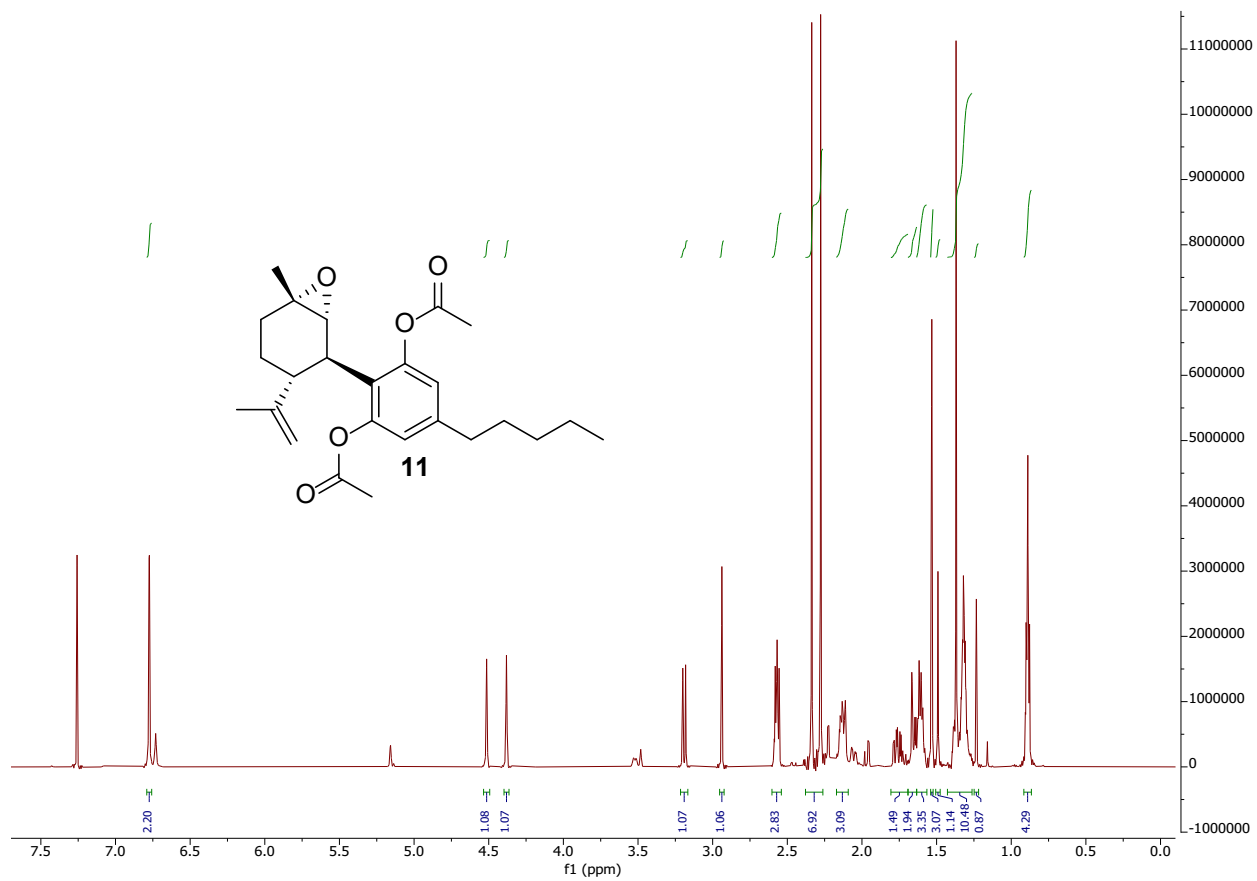

48. 1D  $^{13}\text{C}$  NMR data (150.9 MHz) for 1*S*,2*R*-CBD epoxide diacetate (**11**) in  $\text{CDCl}_3$ .

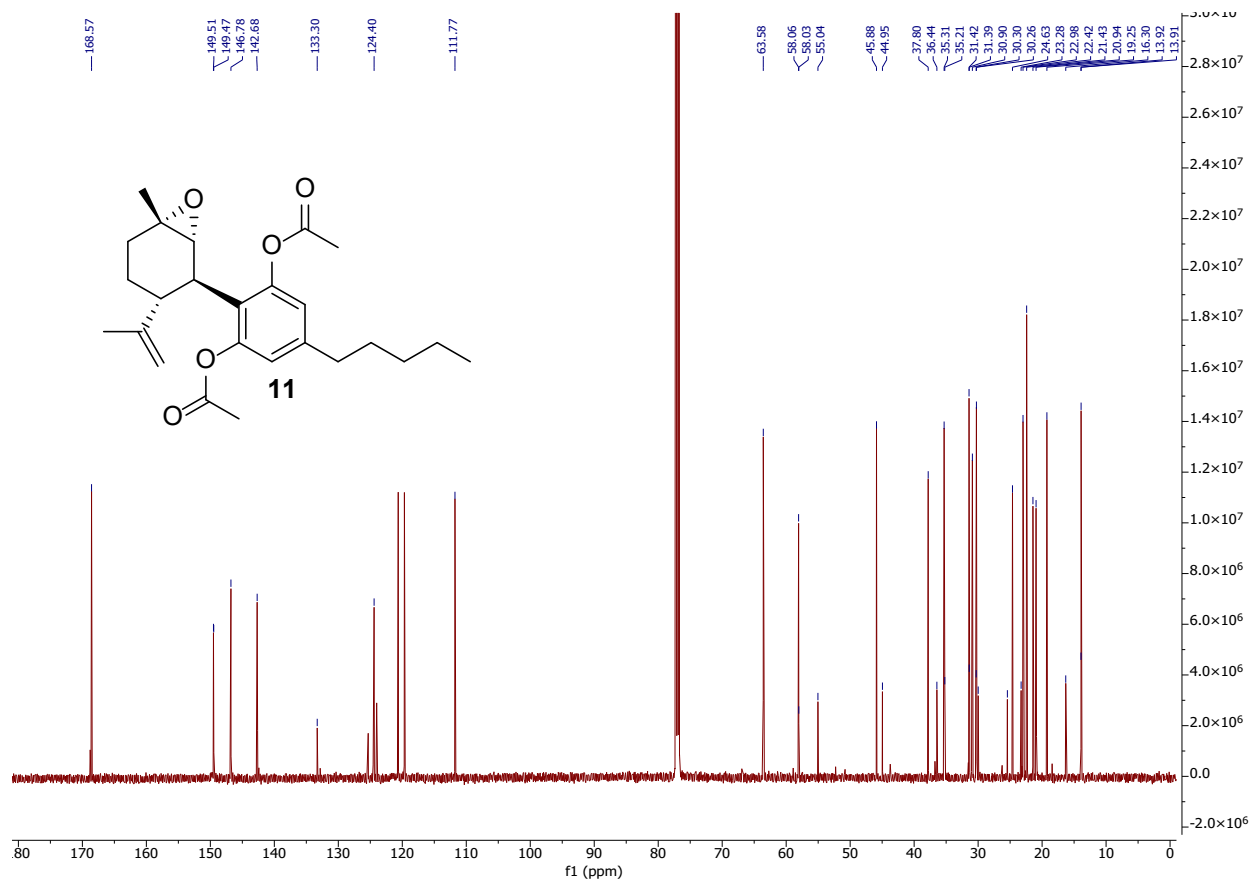

49.  $^1\text{H}$ - $^1\text{H}$  COSY data (600.1 MHz) for 1*S*,2*R*-CBD epoxide diacetate (**11**).

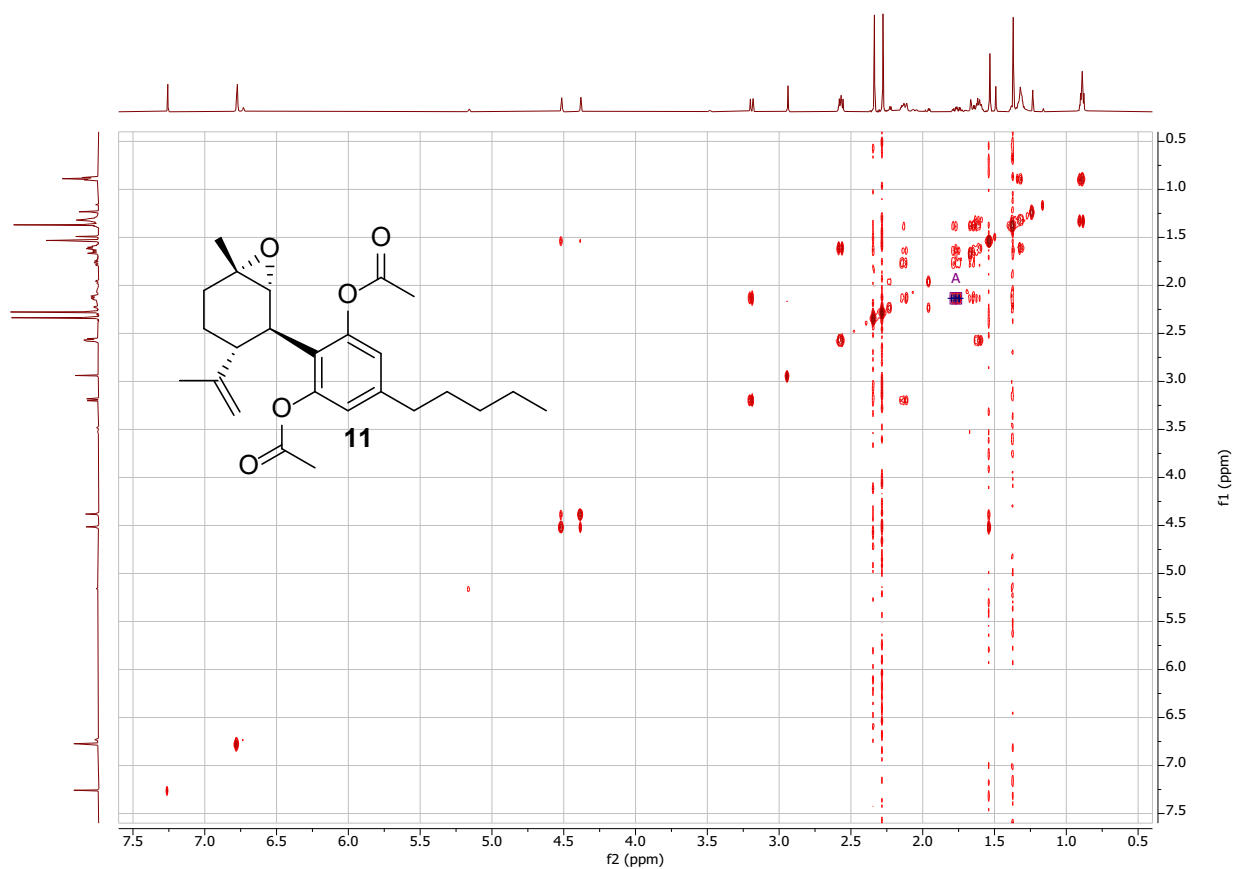

50.  $^1\text{H}$ - $^{13}\text{C}$  Multiplicity-edited HSQC data (600.1 MHz) for 1*S*,2*R*-CBD epoxide diacetate (**11**).

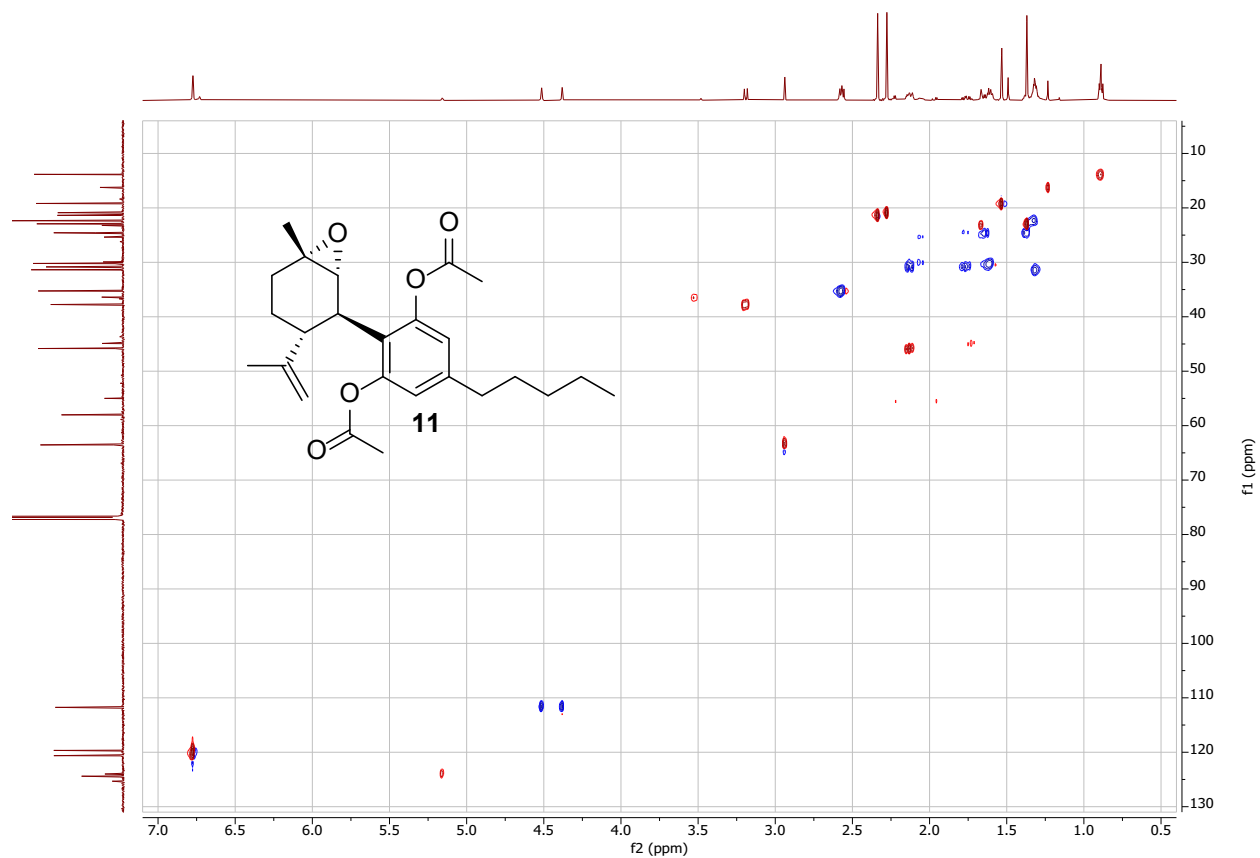

51. 8 Hz Optimized  $^1\text{H}$ - $^{13}\text{C}$  HMBC data (600.1 MHz) for 1*S*,2*R*-CBD epoxide diacetate (**11**).

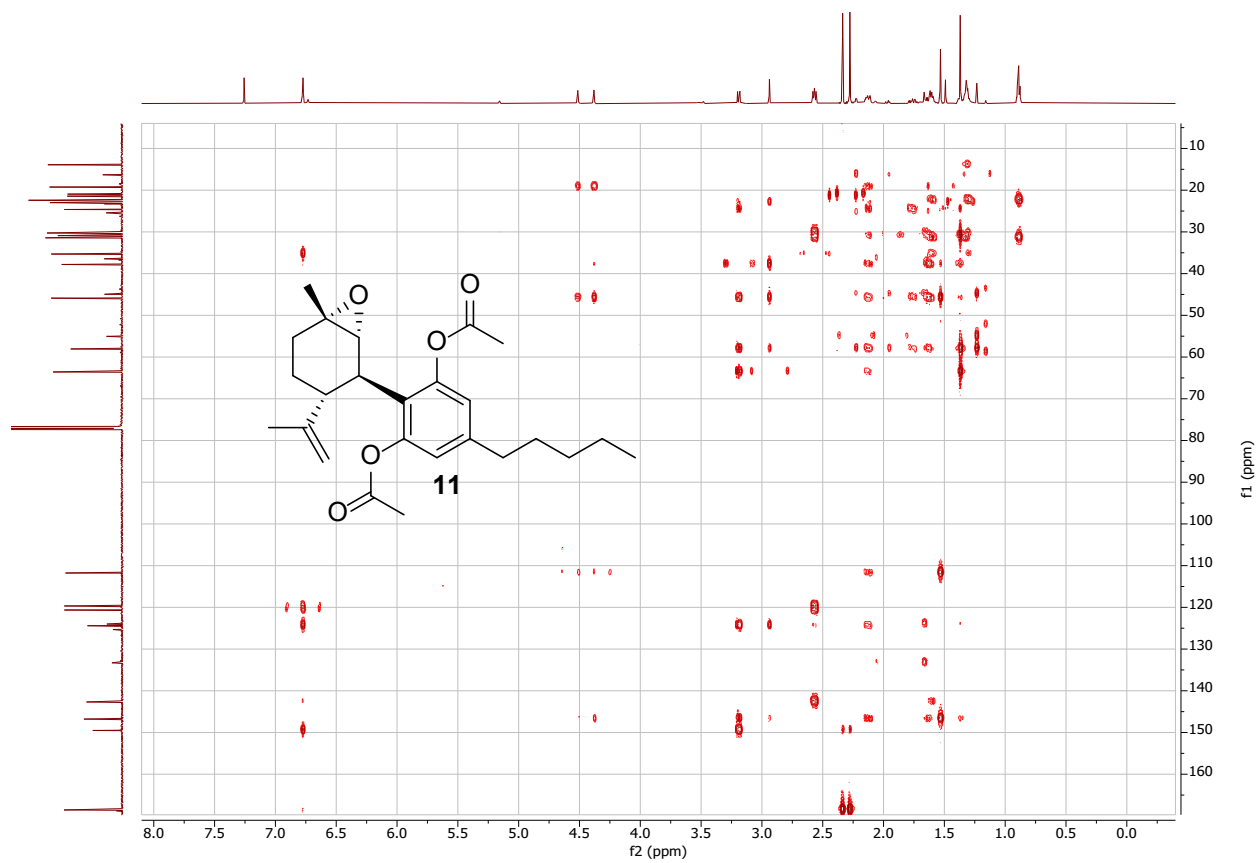

52.  $^1\text{H}$ - $^1\text{H}$  ROESY data (600.1 MHz, 300 ms) for 1*S*,2*R*-CBD epoxide diacetate (**11**).

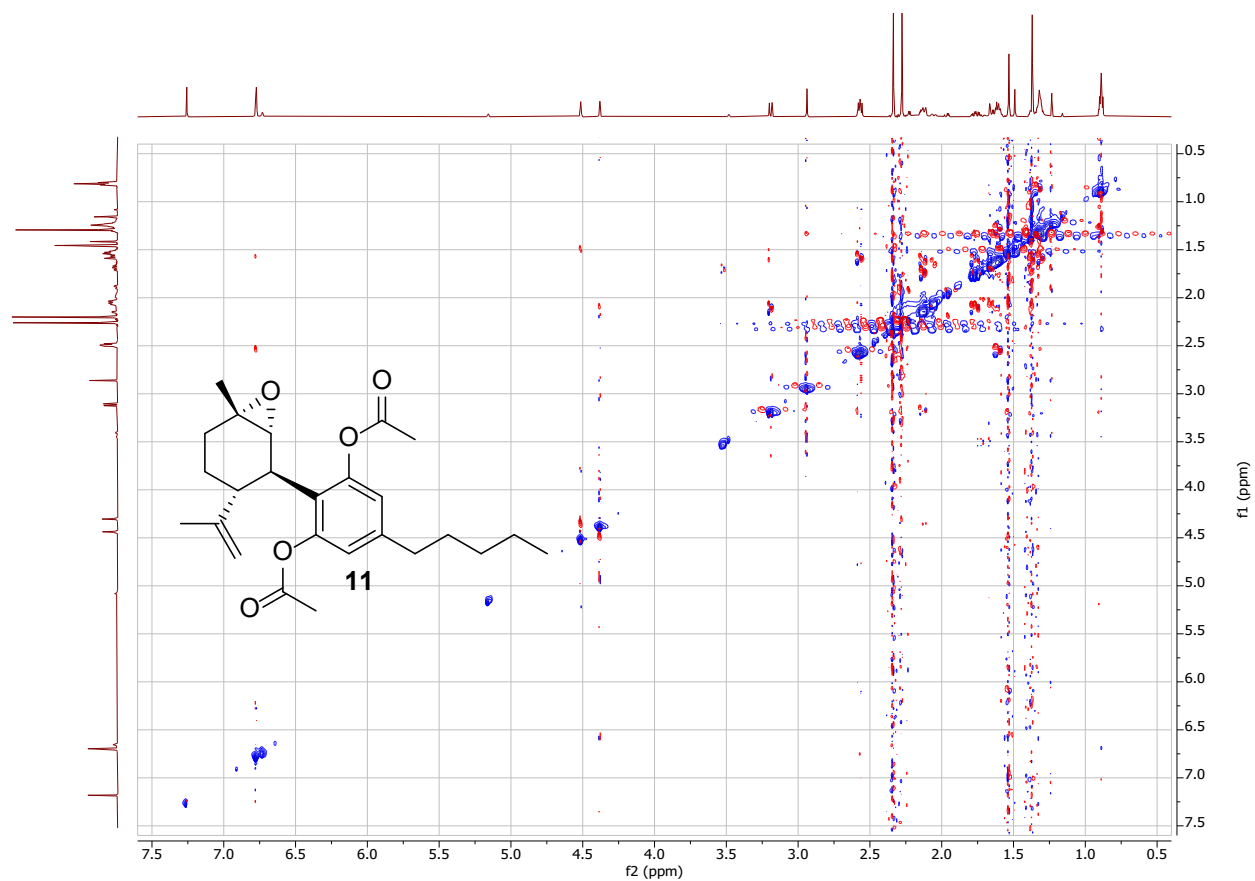

53. Table of NMR assignments for 1*S*,2*R*-CBD epoxide diacetate (**11**).

| Carbon # | <sup>1</sup> H δ, ppm, multiplicity (J Hz) | <sup>13</sup> C δ, multiplicity | HMBC Correlations                 |
|----------|--------------------------------------------|---------------------------------|-----------------------------------|
| 1        |                                            | 58.0, C                         |                                   |
| 2        | 2.94, s                                    | 63.6, CH                        | C1, C3, C4, C7, C6'               |
| 3        | 3.19, d (11.3)                             | 37.8, CH                        | C1, C2, C4, C5, C8, C1', C5', C6' |
| 4        | 2.13, m                                    | 45.9, CH                        | C2, C3, C5, C6, C8, C9, C10, C6'  |
| 5        | 1.76, ddd (14.4, 12.7, 4.6)                | 24.6, CH <sub>2</sub>           | C1, C3, C4, C6, C8                |
| 6        | 1.67, s                                    | 30.3, CH <sub>2</sub>           | C1, C2, C3, C4, C5, C7            |
| 7        | 1.37, s                                    | 23.0, CH <sub>3</sub>           | C1, C2, C6                        |
| 8        |                                            | 146.8, C                        |                                   |
| 9        | 4.51, s 4.38, s                            | 111.8, CH <sub>2</sub>          | C4, C8, C10                       |
| 10       | 1.53, s                                    | 19.3, CH <sub>3</sub>           | C4, C8, C9                        |
|          |                                            |                                 | C1, C3, C4, C7, C6'               |
| 1'       |                                            | 149.51, C                       |                                   |
| 2'       | 6.77, s                                    | 119.7, CH                       | C1', C2', C4', C5', C6', C1''     |
| 3'       |                                            | 142.7, C                        |                                   |
| 4'       | 6.77, s                                    | 120.6, CH                       | C1', C2', C4', C5', C6', C1''     |
| 5'       |                                            | 149.47, C                       |                                   |
| 6'       |                                            | 124.4, C                        |                                   |
| 7'       |                                            | 168.6, C                        |                                   |
| 8'       | 2.28, s                                    | 20.9, CH <sub>3</sub>           | C1', C7'                          |
| 9'       |                                            | 168.6, C                        |                                   |
| 10'      | 2.34, s                                    | 21.4, CH <sub>3</sub>           | C5', C9'                          |
|          |                                            |                                 |                                   |
| 1''      | 2.57, t (7.8)                              | 35.3, CH <sub>2</sub>           | C2', C3', C4', C2'', C3''         |
| 2''      | 1.60, m                                    | 30.9, CH <sub>2</sub>           | C3', C1'', C3'', C4''             |
| 3''      | 1.32, m                                    | 31.4, CH <sub>2</sub>           | C1'', C2'', C4'', C5''            |
| 4''      | 1.32, m                                    | 22.4, CH <sub>2</sub>           | C2'', C3'', C5''                  |
| 5''      | 0.89, t (6.8)                              | 13.9, CH <sub>3</sub>           | C3'', 4''                         |

#### 54. Improved synthesis of CBE (7) from CBD (2).

A dry 2-dram vial was charged with 37.0 mg (0.1 mmol) of cannabidiol (2, ~85% CBD) and a Teflon stir bar. N,O-Bis(trimethylsilyl)trifluoroacetamide (BSTFA, 200  $\mu$ L) was added and the mixture was heated to 60  $^{\circ}$ C under argon. After 30 min, TLC indicated CBD was consumed and a new non-polar spot was formed. Volatiles were removed *in vacuo*.

The silylated CBD mixture was dissolved in 400  $\mu$ L of dichloromethane. After cooling the reaction mixture to 0  $^{\circ}$ C, 30.4 mg of *m*-chloroperbenzoic acid (75% purity, 0.13 mmol) was added all at once. The reaction was stirred for 1 hour at 0  $^{\circ}$ C under argon. After this time, 1.0 mL of 1M NaOH was added, and the suspension was warmed to room temperature. The mixture was extracted with 2 x 2 mL of ethyl acetate, and the combined organic layers were concentrated.

The resulting crude mixture was dissolved in 400  $\mu$ L of methanol and treated with 200  $\mu$ L of 1M NaOH. The reaction was stirred for 1 hour and TLC indicated no intermediate epoxide remained. The suspension had turned a deep purple color that dissipated upon quenching with 200  $\mu$ L of 2M HCl. The aqueous mixture was extracted with 2 x 2 mL of ethyl acetate. The combined organic layer was washed with 2 mL brine, dried over MgSO<sub>4</sub>, filtered, and concentrated. The mixture was purified by silica gel chromatography ramping from 0-35% ethyl acetate in hexanes over 10 minutes to give 23.9 mg (72% yield) of CBE (7) as a pale-yellow film.



## 55. References

1. Nallia, Y., Dar, M. S. Bano, N.; Rasoolb, J. U.; Sarkara, A. R.; Bandaya, J.; Bhat, A. Q.; Rafia, B.; Vishwakarma, R. A.; Dar, M. J.; Ali, A. *Bioorg. Med. Chem. Lett.* **2019**, *29*, 1043–1046.
2. Taglialatela-Scafati, O.; Pagani, A.; Scala, F.; De Petrocellis, L.; Di Marzo, V.; Grassi, G.; Appendino, G. *Eur. J. Org. Chem.* **2010**, 2067–2072.
3. Shani, A., Mechoulam, R. *Tetrahedron*, **1974**, *30*, 2437-2446.
