# Supplementary material for: Structural revision of a Wnt/β-catenin modulator and confirmation of cannabielsoin constitution and configuration
Source: Royal Society of Chemistry journal article supplement (doi:10.1039/d1cc01971f), 2021-01-01
Supplement: d1cc01971f2.pdf [file d1cc01971f2.pdf]

## Supporting Information - 2

### Structural Revision of a Wnt/ $\beta$ -catenin Modulator and Confirmation of Cannabielsoin Constitution and Configuration

Angelina Z. Monroe,<sup>a</sup> William H. Gordon,<sup>a</sup> Jared S. Wood,<sup>a</sup> Gary E. Martin,<sup>b</sup> Jeremy B. Morgan,<sup>a\*</sup> R. Thomas Williamson<sup>a\*</sup>

a. Department of Chemistry & Biochemistry, University of North Carolina Wilmington, Wilmington, North Carolina 28409, United States

b. Department of Chemistry, Seton Hall University, South Orange, New Jersey, 07079, United States

\*E-mail: [williamsonr@uncw.edu](mailto:williamsonr@uncw.edu) and [morganj@uncw.edu](mailto:morganj@uncw.edu)

#### Table of Contents

|                                                                                                                                                                                                                                                 |      |
|-------------------------------------------------------------------------------------------------------------------------------------------------------------------------------------------------------------------------------------------------|------|
| 1. Atom numbering key for DFT calculations.                                                                                                                                                                                                     | S2   |
| 2. DFT calculation data for 1 <i>R</i> ,2 <i>S</i> -CBD epoxide ( <b>5</b> ). Energies, optimized geometries, NMR shielding values and IR frequencies from calculations performed at the mPW1PW91/6-311+G(2d,p)//M06-2X-D3/6-31G(d,p) level.    | S3   |
| 3. DFT calculation data for CBE ( <b>7</b> ). Energies, optimized geometries, NMR shielding values and IR frequencies from calculations performed at the mPW1PW91/6-311+G(2d,p)//M06-2X-D3/6-31G(d,p) level.                                    | S50  |
| 4. DFT calculation data for CBE with alternate configuration at C1 ( <b>8</b> ). Energies, optimized geometries, NMR shielding values and IR frequencies from calculations performed at the mPW1PW91/6-311+G(2d,p)//M06-2X-D3/6-31G(d,p) level. | S122 |
| 5. DFT calculation data for the 6-membered cyclic ether ( <b>9</b> ). Energies, optimized geometries, NMR shielding values and IR frequencies from calculations performed at the mPW1PW91/6-311+G(2d,p)//M06-2X-D3/6-31G(d,p) level.            | S194 |

1. Atom numbering key for DFT calculations.

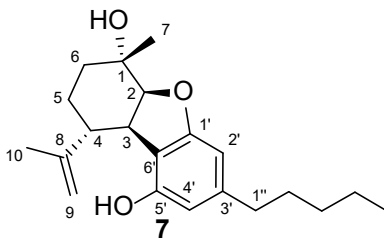

|                             | <b>CBE (7) &amp; Alternate CBE configuration at C1 (8)</b> | <b>1<i>R</i>, 2<i>S</i>-CBD epoxide (5)</b> | <b>6-membered cyclic ether (9)</b> |
|-----------------------------|------------------------------------------------------------|---------------------------------------------|------------------------------------|
| <b>Literature Numbering</b> | <b>DFT numbering</b>                                       | <b>DFT numbering</b>                        | <b>DFT numbering</b>               |
| 1                           | 6                                                          | 6                                           | 6                                  |
| 2                           | 5                                                          | 5                                           | 5                                  |
| 3                           | 4                                                          | 4                                           | 4                                  |
| 4                           | 3                                                          | 3                                           | 3                                  |
| 5                           | 2                                                          | 2                                           | 2                                  |
| 6                           | 1                                                          | 1                                           | 1                                  |
| 7                           | 7                                                          | 7                                           | 7                                  |
| 8                           | 8                                                          | 14                                          | 8                                  |
| 9                           | 20                                                         | 15                                          | 18                                 |
| 10                          | 19                                                         | 16                                          | 19                                 |
| 1'                          | 11                                                         | 13                                          | 12                                 |
| 2'                          | 9                                                          | 8                                           | 9                                  |
| 3'                          | 10                                                         | 9                                           | 10                                 |
| 4'                          | 14                                                         | 10                                          | 15                                 |
| 5'                          | 13                                                         | 11                                          | 14                                 |
| 6'                          | 12                                                         | 12                                          | 13                                 |

2. DFT calculation data for 1*R*,2*S*-CBD epoxide (**5**). Energies, optimized geometries, NMR shielding values and IR frequencies from calculations performed at the mPW1PW91/6-311+G(2d,p)//M06-2X-D3/6-31G(d,p) level.

Conformer #1:

Boltzmann Population = 64.0% (relative energy = 0.00 kcal/mol)

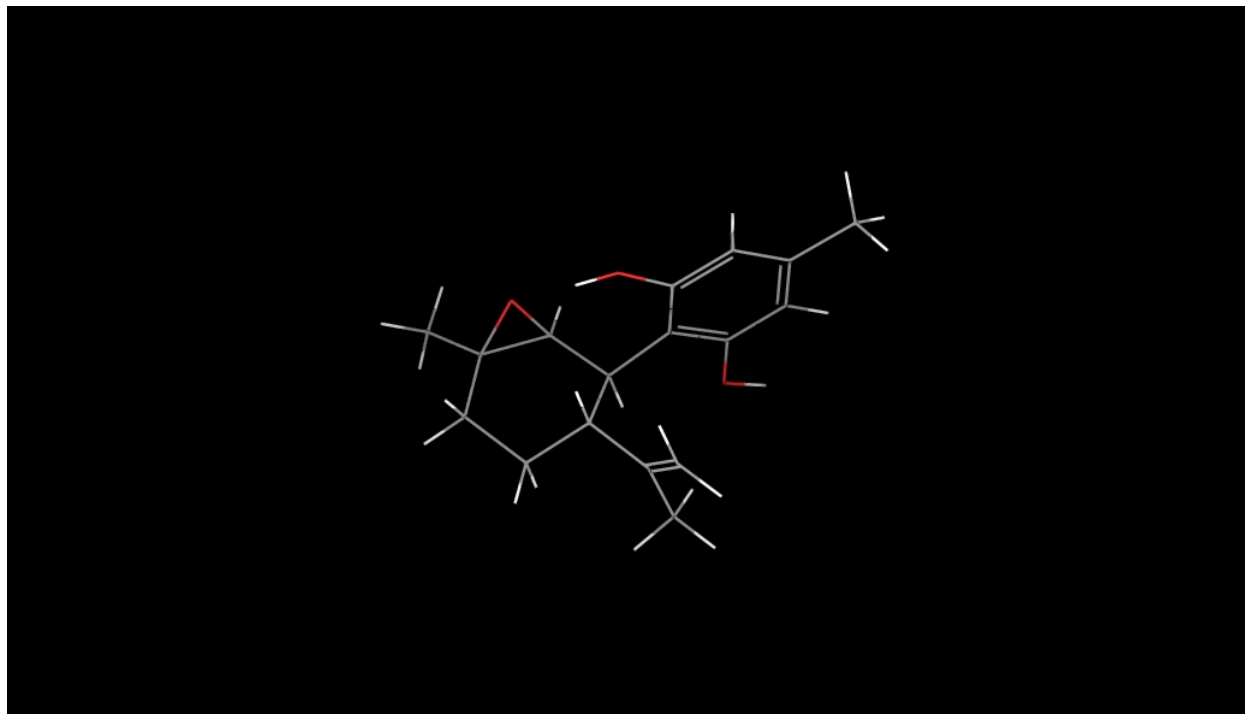

Geometries and Energy Method: M06-2X-D3/6-31G(d,p)

NMR Method: mPW1PW91/6-311+G(2d,p)

Thermodynamic properties for P = 1.00 atm, calculated at 1 temperatures

T = 298.15 K, P = 1.00 atm

Total internal energy, Utot (SCFE + ZPE + U): -885.956030 hartrees

Total enthalpy, Htot (Utot + pV): -885.955086 hartrees

Total Gibbs free energy, Gtot (Htot - T\*S): -886.017416 hartrees

Optimized Geometry:

| Center Number | Atomic Number | Atomic Type | Coordinates (Angstroms) |           |          |
|---------------|---------------|-------------|-------------------------|-----------|----------|
|               |               |             | X                       | Y         | Z        |
| 1             | 6             | 0           | -1.451400               | -2.518800 | 0.082100 |

|    |   |   |           |           |           |
|----|---|---|-----------|-----------|-----------|
| 2  | 6 | 0 | -0.448700 | -3.555200 | 0.592600  |
| 3  | 6 | 0 | -0.557200 | -3.734500 | 2.112100  |
| 4  | 6 | 0 | -0.104300 | -2.424300 | 2.806500  |
| 5  | 6 | 0 | -0.806800 | -1.211900 | 2.228900  |
| 6  | 6 | 0 | -1.455300 | -1.238400 | 0.903800  |
| 7  | 6 | 0 | -1.647700 | 0.048200  | 0.141900  |
| 8  | 6 | 0 | -0.221300 | -2.499100 | 4.317600  |
| 9  | 6 | 0 | -1.433700 | -2.755600 | 4.979900  |
| 10 | 6 | 0 | -1.477100 | -2.931500 | 6.364200  |
| 11 | 6 | 0 | -0.321800 | -2.843600 | 7.129600  |
| 12 | 6 | 0 | 0.888200  | -2.566700 | 6.494400  |
| 13 | 6 | 0 | 0.927400  | -2.405100 | 5.113300  |
| 14 | 6 | 0 | 0.225800  | -4.925200 | 2.621500  |
| 15 | 6 | 0 | -0.392200 | -5.903500 | 3.282400  |
| 16 | 6 | 0 | 1.711800  | -4.945100 | 2.373800  |
| 17 | 8 | 0 | -2.618500 | -2.880500 | 4.332000  |
| 18 | 8 | 0 | 2.111700  | -2.149100 | 4.472300  |
| 19 | 6 | 0 | -0.370100 | -3.062500 | 8.620100  |
| 20 | 8 | 0 | -2.232900 | -1.297500 | 2.112100  |
| 21 | 1 | 0 | -1.235700 | -2.268900 | -0.961800 |
| 22 | 1 | 0 | -2.468500 | -2.927900 | 0.106300  |
| 23 | 1 | 0 | 0.568300  | -3.229100 | 0.338800  |
| 24 | 1 | 0 | -0.612600 | -4.514300 | 0.090500  |
| 25 | 1 | 0 | -1.609900 | -3.915000 | 2.356200  |
| 26 | 1 | 0 | 0.956600  | -2.280100 | 2.574200  |
| 27 | 1 | 0 | -0.461700 | -0.251600 | 2.614200  |
| 28 | 1 | 0 | -2.568300 | 0.001800  | -0.447600 |
| 29 | 1 | 0 | -1.718100 | 0.892300  | 0.830800  |
| 30 | 1 | 0 | -0.811700 | 0.215300  | -0.543100 |
| 31 | 1 | 0 | -2.441700 | -3.129400 | 6.819800  |
| 32 | 1 | 0 | 1.804400  | -2.480800 | 7.075000  |
| 33 | 1 | 0 | 0.151000  | -6.765600 | 3.658200  |
| 34 | 1 | 0 | -1.458700 | -5.861700 | 3.484100  |
| 35 | 1 | 0 | 2.202600  | -4.104400 | 2.877600  |
| 36 | 1 | 0 | 2.154300  | -5.870900 | 2.748100  |
| 37 | 1 | 0 | 1.943200  | -4.866500 | 1.305500  |
| 38 | 1 | 0 | -2.597000 | -2.441200 | 3.464900  |
| 39 | 1 | 0 | 2.822200  | -2.159400 | 5.122800  |
| 40 | 1 | 0 | -1.320200 | -2.720800 | 9.037200  |
| 41 | 1 | 0 | -0.268300 | -4.126400 | 8.857900  |
| 42 | 1 | 0 | 0.438800  | -2.530400 | 9.126800  |

-----

SCF GIAO Magnetic shielding tensor (ppm):

|              |          |             |          |              |          |
|--------------|----------|-------------|----------|--------------|----------|
| 1            | C        | Isotropic = | 155.0202 | Anisotropy = | 23.4671  |
| XX=          | 149.6471 | YX=         | -4.1107  | ZX=          | 2.2065   |
| XY=          | -2.6097  | YY=         | 166.0705 | ZY=          | -9.4789  |
| XZ=          | -4.7111  | YZ=         | -9.4909  | ZZ=          | 149.3430 |
| Eigenvalues: | 143.9025 | 150.4932    | 170.6650 |              |          |
| 2            | C        | Isotropic = | 156.1293 | Anisotropy = | 16.1127  |
| XX=          | 166.0654 | YX=         | -2.3979  | ZX=          | -0.8734  |

|              |             |          |              |     |          |          |  |
|--------------|-------------|----------|--------------|-----|----------|----------|--|
| XY=          | -4.0024     | YY=      | 152.8028     | ZY= | -0.7218  |          |  |
| XZ=          | 2.0337      | YZ=      | -4.2623      | ZZ= | 149.5198 |          |  |
| Eigenvalues: | 148.1153    |          | 153.4016     |     | 166.8711 |          |  |
| 3 C          | Isotropic = | 144.0710 | Anisotropy = |     |          | 30.4820  |  |
| XX=          | 150.6084    | YX=      | 13.1990      | ZX= | 1.0765   |          |  |
| XY=          | 13.1424     | YY=      | 151.7998     | ZY= | 3.7351   |          |  |
| XZ=          | -1.5018     | YZ=      | -2.2862      | ZZ= | 129.8049 |          |  |
| Eigenvalues: | 129.7490    |          | 138.0717     |     | 164.3924 |          |  |
| 4 C          | Isotropic = | 147.5982 | Anisotropy = |     |          | 22.7020  |  |
| XX=          | 144.8831    | YX=      | -2.2415      | ZX= | 0.1907   |          |  |
| XY=          | -9.7362     | YY=      | 155.9236     | ZY= | -7.6103  |          |  |
| XZ=          | -2.4349     | YZ=      | -13.0661     | ZZ= | 141.9878 |          |  |
| Eigenvalues: | 134.9035    |          | 145.1582     |     | 162.7329 |          |  |
| 5 C          | Isotropic = | 120.5496 | Anisotropy = |     |          | 52.7303  |  |
| XX=          | 93.5737     | YX=      | 10.5193      | ZX= | -18.8588 |          |  |
| XY=          | 13.2411     | YY=      | 142.9286     | ZY= | -8.2412  |          |  |
| XZ=          | -20.5223    | YZ=      | -16.1903     | ZZ= | 125.1466 |          |  |
| Eigenvalues: | 83.5801     |          | 122.3655     |     | 155.7031 |          |  |
| 6 C          | Isotropic = | 125.4540 | Anisotropy = |     |          | 55.9141  |  |
| XX=          | 83.5120     | YX=      | 3.1299       | ZX= | -23.9139 |          |  |
| XY=          | -0.2507     | YY=      | 156.2684     | ZY= | -10.4721 |          |  |
| XZ=          | -28.5959    | YZ=      | -9.7661      | ZZ= | 136.5814 |          |  |
| Eigenvalues: | 72.6414     |          | 140.9905     |     | 162.7300 |          |  |
| 7 C          | Isotropic = | 162.0615 | Anisotropy = |     |          | 43.5907  |  |
| XX=          | 167.6907    | YX=      | 8.8366       | ZX= | -16.3395 |          |  |
| XY=          | 8.3783      | YY=      | 171.5261     | ZY= | -20.3000 |          |  |
| XZ=          | -11.6260    | YZ=      | -17.9449     | ZZ= | 146.9677 |          |  |
| Eigenvalues: | 134.2484    |          | 160.8142     |     | 191.1220 |          |  |
| 8 C          | Isotropic = | 73.4556  | Anisotropy = |     |          | 124.8022 |  |
| XX=          | 26.1976     | YX=      | 16.4827      | ZX= | -0.6726  |          |  |
| XY=          | 19.2686     | YY=      | 130.5719     | ZY= | -45.0002 |          |  |
| XZ=          | -8.3545     | YZ=      | -47.4830     | ZZ= | 63.5974  |          |  |
| Eigenvalues: | 22.7603     |          | 40.9495      |     | 156.6571 |          |  |
| 9 C          | Isotropic = | 22.5334  | Anisotropy = |     |          | 140.9472 |  |
| XX=          | -19.7946    | YX=      | -11.7454     | ZX= | -39.2653 |          |  |
| XY=          | -2.4838     | YY=      | 89.0880      | ZY= | -53.4928 |          |  |
| XZ=          | -41.1938    | YZ=      | -57.9393     | ZZ= | -1.6931  |          |  |
| Eigenvalues: | -63.8866    |          | 14.9887      |     | 116.4982 |          |  |
| 10 C         | Isotropic = | 71.5417  | Anisotropy = |     |          | 120.0691 |  |
| XX=          | 65.3786     | YX=      | 13.2704      | ZX= | 16.1668  |          |  |
| XY=          | 13.8486     | YY=      | 116.6344     | ZY= | -66.1070 |          |  |
| XZ=          | 21.3046     | YZ=      | -62.6073     | ZZ= | 32.6122  |          |  |
| Eigenvalues: | -9.2810     |          | 72.3184      |     | 151.5878 |          |  |
| 11 C         | Isotropic = | 42.7669  | Anisotropy = |     |          | 194.2449 |  |
| XX=          | -50.4400    | YX=      | 22.8163      | ZX= | 8.8101   |          |  |
| XY=          | 21.0316     | YY=      | 137.1072     | ZY= | -66.7492 |          |  |
| XZ=          | 7.5113      | YZ=      | -66.0163     | ZZ= | 41.6336  |          |  |
| Eigenvalues: | -56.2065    |          | 12.2438      |     | 172.2635 |          |  |
| 12 C         | Isotropic = | 79.7747  | Anisotropy = |     |          | 96.5553  |  |
| XX=          | 54.0916     | YX=      | -13.0485     | ZX= | -39.5934 |          |  |
| XY=          | -20.9954    | YY=      | 126.7729     | ZY= | -38.3437 |          |  |
| XZ=          | -39.5795    | YZ=      | -38.7994     | ZZ= | 58.4597  |          |  |

|              |             |          |              |                   |           |
|--------------|-------------|----------|--------------|-------------------|-----------|
| Eigenvalues: | 4.0196      | 91.1597  | 144.1450     |                   |           |
| 13 C         | Isotropic = | 28.2724  | Anisotropy = | 133.0311          |           |
| XX=          | 22.6274     | YX=      | 18.6909      | ZX=               | 19.3799   |
| XY=          | 19.7814     | YY=      | 76.4814      | ZY=               | -74.2149  |
| XZ=          | 11.4818     | YZ=      | -69.2751     | <td>-14.2915</td> | -14.2915  |
| Eigenvalues: | -60.1192    | 27.9766  | 116.9599     |                   |           |
| 14 C         | Isotropic = | 31.1228  | Anisotropy = | 190.3842          |           |
| XX=          | 95.0735     | YX=      | -82.5810     | ZX=               | 19.6116   |
| XY=          | -81.5138    | YY=      | -21.8595     | ZY=               | -71.7578  |
| XZ=          | 22.9483     | YZ=      | -68.1534     | <td>20.1545</td>  | 20.1545   |
| Eigenvalues: | -91.5408    | 26.8636  | 158.0457     |                   |           |
| 15 C         | Isotropic = | 69.4797  | Anisotropy = | 108.1205          |           |
| XX=          | 110.3606    | YX=      | -52.1131     | ZX=               | -6.3560   |
| XY=          | -54.3799    | YY=      | 16.3838      | ZY=               | -53.3076  |
| XZ=          | -4.9252     | YZ=      | -55.8031     | <td>81.6948</td>  | 81.6948   |
| Eigenvalues: | -31.8783    | 98.7574  | 141.5601     |                   |           |
| 16 C         | Isotropic = | 168.5390 | Anisotropy = | 29.0979           |           |
| XX=          | 157.6632    | YX=      | 1.3475       | ZX=               | 2.7799    |
| XY=          | 0.6371      | YY=      | 173.7417     | ZY=               | 14.5384   |
| XZ=          | 1.0406      | YZ=      | 13.0991      | <td>174.2122</td> | 174.2122  |
| Eigenvalues: | 157.3802    | 160.2992 | 187.9376     |                   |           |
| 17 O         | Isotropic = | 200.4024 | Anisotropy = | 88.6523           |           |
| XX=          | 157.7144    | YX=      | 4.3193       | ZX=               | 18.4947   |
| XY=          | 17.0423     | YY=      | 228.6846     | ZY=               | -60.5844  |
| XZ=          | 30.4262     | YZ=      | -12.4557     | <td>214.8083</td> | 214.8083  |
| Eigenvalues: | 141.8482    | 199.8551 | 259.5040     |                   |           |
| 18 O         | Isotropic = | 212.3209 | Anisotropy = | 51.8655           |           |
| XX=          | 173.5224    | YX=      | -5.5411      | ZX=               | -10.8141  |
| XY=          | -8.0516     | YY=      | 225.5591     | ZY=               | 4.8230    |
| XZ=          | -27.6186    | YZ=      | 9.7840       | <td>237.8813</td> | 237.8813  |
| Eigenvalues: | 167.8465    | 222.2184 | 246.8980     |                   |           |
| 19 C         | Isotropic = | 164.4873 | Anisotropy = | 40.9153           |           |
| XX=          | 190.0622    | YX=      | -10.7182     | ZX=               | -1.2732   |
| XY=          | -3.2101     | YY=      | 147.5863     | ZY=               | 5.5506    |
| XZ=          | -5.8804     | YZ=      | 7.4082       | <td>155.8133</td> | 155.8133  |
| Eigenvalues: | 143.5869    | 158.1108 | 191.7642     |                   |           |
| 20 O         | Isotropic = | 262.3675 | Anisotropy = | 135.6304          |           |
| XX=          | 330.0888    | YX=      | 12.2344      | ZX=               | 4.4493    |
| XY=          | 34.4647     | YY=      | 268.6804     | ZY=               | -118.5916 |
| XZ=          | 10.6374     | YZ=      | -94.2211     | <td>188.3332</td> | 188.3332  |
| Eigenvalues: | 113.0127    | 321.3020 | 352.7877     |                   |           |
| 21 H         | Isotropic = | 29.9462  | Anisotropy = | 8.7388            |           |
| XX=          | 35.5129     | YX=      | -0.1688      | ZX=               | -1.6868   |
| XY=          | -1.1127     | YY=      | 29.3831      | ZY=               | -0.8990   |
| XZ=          | -1.3624     | YZ=      | -0.6596      | <td>24.9427</td>  | 24.9427   |
| Eigenvalues: | 24.5722     | 29.4945  | 35.7721      |                   |           |
| 22 H         | Isotropic = | 29.8767  | Anisotropy = | 8.0630            |           |
| XX=          | 28.6800     | YX=      | 1.1220       | ZX=               | 3.6046    |
| XY=          | -0.3838     | YY=      | 27.9985      | ZY=               | -0.4027   |
| XZ=          | 4.1621      | YZ=      | 0.3799       | <td>32.9515</td>  | 32.9515   |
| Eigenvalues: | 26.3213     | 28.0567  | 35.2520      |                   |           |
| 23 H         | Isotropic = | 30.2468  | Anisotropy = | 6.8914            |           |

|              |             |         |              |     |         |         |  |
|--------------|-------------|---------|--------------|-----|---------|---------|--|
| XX=          | 30.5571     | YX=     | 0.0844       | ZX= | -2.0738 |         |  |
| XY=          | -0.1396     | YY=     | 31.3696      | ZY= | 4.7475  |         |  |
| XZ=          | -1.2586     | YZ=     | 3.8734       | ZZ= | 28.8138 |         |  |
| Eigenvalues: | 25.2605     |         | 30.6389      |     | 34.8411 |         |  |
| 24 H         | Isotropic = | 30.3720 | Anisotropy = |     |         | 9.3929  |  |
| XX=          | 30.8233     | YX=     | -1.7997      | ZX= | 2.3680  |         |  |
| XY=          | -2.4062     | YY=     | 33.0978      | ZY= | -3.7781 |         |  |
| XZ=          | 3.1222      | YZ=     | -3.7417      | ZZ= | 27.1949 |         |  |
| Eigenvalues: | 24.8852     |         | 29.5969      |     | 36.6339 |         |  |
| 25 H         | Isotropic = | 28.7616 | Anisotropy = |     |         | 3.4998  |  |
| XX=          | 27.7663     | YX=     | 0.3197       | ZX= | -2.1262 |         |  |
| XY=          | -1.9274     | YY=     | 28.6981      | ZY= | 0.4914  |         |  |
| XZ=          | -1.6923     | YZ=     | -0.1569      | ZZ= | 29.8203 |         |  |
| Eigenvalues: | 26.4573     |         | 28.7327      |     | 31.0948 |         |  |
| 26 H         | Isotropic = | 27.8738 | Anisotropy = |     |         | 8.9753  |  |
| XX=          | 28.4858     | YX=     | 1.0396       | ZX= | 3.7169  |         |  |
| XY=          | 1.9984      | YY=     | 26.2582      | ZY= | 3.7830  |         |  |
| XZ=          | 3.2369      | YZ=     | 3.0978       | ZZ= | 28.8775 |         |  |
| Eigenvalues: | 23.7088     |         | 26.0553      |     | 33.8573 |         |  |
| 27 H         | Isotropic = | 28.7553 | Anisotropy = |     |         | 9.9498  |  |
| XX=          | 26.0672     | YX=     | 3.6468       | ZX= | 0.6432  |         |  |
| XY=          | 1.9921      | YY=     | 28.9310      | ZY= | -6.1323 |         |  |
| XZ=          | 2.6741      | YZ=     | -4.1320      | ZZ= | 31.2677 |         |  |
| Eigenvalues: | 22.1486     |         | 28.7289      |     | 35.3885 |         |  |
| 28 H         | Isotropic = | 30.1433 | Anisotropy = |     |         | 9.5537  |  |
| XX=          | 32.9861     | YX=     | 3.9251       | ZX= | 2.4545  |         |  |
| XY=          | 5.2340      | YY=     | 29.6093      | ZY= | 0.8816  |         |  |
| XZ=          | 0.9528      | YZ=     | 0.1729       | ZZ= | 27.8344 |         |  |
| Eigenvalues: | 26.1988     |         | 27.7186      |     | 36.5124 |         |  |
| 29 H         | Isotropic = | 31.1901 | Anisotropy = |     |         | 10.5691 |  |
| XX=          | 29.5485     | YX=     | 1.0333       | ZX= | -0.5830 |         |  |
| XY=          | 0.9539      | YY=     | 35.2447      | ZY= | -5.2516 |         |  |
| XZ=          | -0.4863     | YZ=     | -5.0427      | ZZ= | 28.7770 |         |  |
| Eigenvalues: | 25.9321     |         | 29.4020      |     | 38.2361 |         |  |
| 30 H         | Isotropic = | 30.3651 | Anisotropy = |     |         | 10.1904 |  |
| XX=          | 31.8638     | YX=     | -0.3902      | ZX= | -5.4634 |         |  |
| XY=          | 1.4242      | YY=     | 27.6488      | ZY= | -0.2596 |         |  |
| XZ=          | -5.3869     | YZ=     | 0.5064       | ZZ= | 31.5826 |         |  |
| Eigenvalues: | 26.1600     |         | 27.7765      |     | 37.1587 |         |  |
| 31 H         | Isotropic = | 25.1770 | Anisotropy = |     |         | 7.4655  |  |
| XX=          | 29.9131     | YX=     | -0.4550      | ZX= | 1.4191  |         |  |
| XY=          | -0.5419     | YY=     | 22.4209      | ZY= | 1.4931  |         |  |
| XZ=          | 1.1228      | YZ=     | 1.1643       | ZZ= | 23.1972 |         |  |
| Eigenvalues: | 21.2656     |         | 24.1115      |     | 30.1540 |         |  |
| 32 H         | Isotropic = | 25.8117 | Anisotropy = |     |         | 6.7535  |  |
| XX=          | 28.6251     | YX=     | -2.1307      | ZX= | -1.8363 |         |  |
| XY=          | -2.0729     | YY=     | 22.9518      | ZY= | 1.4185  |         |  |
| XZ=          | -1.4154     | YZ=     | 1.9438       | ZZ= | 25.8583 |         |  |
| Eigenvalues: | 21.9077     |         | 25.2133      |     | 30.3141 |         |  |
| 33 H         | Isotropic = | 27.1777 | Anisotropy = |     |         | 6.4891  |  |
| XX=          | 26.5010     | YX=     | 1.3142       | ZX= | -1.7379 |         |  |
| XY=          | -0.5086     | YY=     | 26.6909      | ZY= | -1.6307 |         |  |

|              |             |         |              |         |         |  |
|--------------|-------------|---------|--------------|---------|---------|--|
| XZ=          | -3.0267     | YZ=     | -4.2132      | ZZ=     | 28.3412 |  |
| Eigenvalues: | 23.8470     |         | 26.1823      |         | 31.5038 |  |
| 34 H         | Isotropic = | 26.8709 | Anisotropy = | 7.4573  |         |  |
| XX=          | 25.7598     | YX=     | -0.6828      | ZX=     | -3.4551 |  |
| XY=          | -0.4219     | YY=     | 25.5803      | ZY=     | -4.7982 |  |
| XZ=          | -1.3429     | YZ=     | -1.9891      | ZZ=     | 29.2727 |  |
| Eigenvalues: | 22.5482     |         | 26.2222      |         | 31.8425 |  |
| 35 H         | Isotropic = | 29.5214 | Anisotropy = | 7.1318  |         |  |
| XX=          | 26.5586     | YX=     | -0.7119      | ZX=     | 4.9115  |  |
| XY=          | -1.6975     | YY=     | 31.3054      | ZY=     | 0.1114  |  |
| XZ=          | 4.0957      | YZ=     | -1.9529      | ZZ=     | 30.7001 |  |
| Eigenvalues: | 23.6367     |         | 30.6516      |         | 34.2759 |  |
| 36 H         | Isotropic = | 30.3700 | Anisotropy = | 8.7062  |         |  |
| XX=          | 28.3340     | YX=     | 2.9604       | ZX=     | -1.1023 |  |
| XY=          | 3.3966      | YY=     | 34.8811      | ZY=     | -0.2028 |  |
| XZ=          | 0.1927      | YZ=     | 0.9518       | ZZ=     | 27.8948 |  |
| Eigenvalues: | 26.7643     |         | 28.1715      |         | 36.1741 |  |
| 37 H         | Isotropic = | 30.2509 | Anisotropy = | 7.6669  |         |  |
| XX=          | 31.9481     | YX=     | -1.0827      | ZX=     | -1.7692 |  |
| XY=          | -2.4900     | YY=     | 32.1561      | ZY=     | 3.9249  |  |
| XZ=          | -1.9486     | YZ=     | 2.4947       | ZZ=     | 26.6486 |  |
| Eigenvalues: | 25.0309     |         | 30.3597      |         | 35.3622 |  |
| 38 H         | Isotropic = | 24.4130 | Anisotropy = | 23.8654 |         |  |
| XX=          | 36.3205     | YX=     | 2.2986       | ZX=     | -8.8806 |  |
| XY=          | 6.1974      | YY=     | 16.0192      | ZY=     | 4.3170  |  |
| XZ=          | -8.0940     | YZ=     | 3.0650       | ZZ=     | 20.8992 |  |
| Eigenvalues: | 11.3445     |         | 21.5712      |         | 40.3233 |  |
| 39 H         | Isotropic = | 28.2131 | Anisotropy = | 14.4805 |         |  |
| XX=          | 32.0372     | YX=     | 0.8044       | ZX=     | 4.5816  |  |
| XY=          | 1.9738      | YY=     | 22.6248      | ZY=     | 5.2637  |  |
| XZ=          | 6.5277      | YZ=     | 4.5343       | ZZ=     | 29.9772 |  |
| Eigenvalues: | 20.0140     |         | 26.7584      |         | 37.8667 |  |
| 40 H         | Isotropic = | 29.6512 | Anisotropy = | 8.1917  |         |  |
| XX=          | 30.9320     | YX=     | -3.3181      | ZX=     | -1.7108 |  |
| XY=          | -2.4767     | YY=     | 30.1501      | ZY=     | 4.3248  |  |
| XZ=          | 0.1930      | YZ=     | 3.7846       | ZZ=     | 27.8715 |  |
| Eigenvalues: | 24.5602     |         | 29.2811      |         | 35.1124 |  |
| 41 H         | Isotropic = | 29.3740 | Anisotropy = | 8.7520  |         |  |
| XX=          | 31.9840     | YX=     | 2.3430       | ZX=     | -2.6893 |  |
| XY=          | 3.5290      | YY=     | 28.1555      | ZY=     | -1.9871 |  |
| XZ=          | -3.0921     | YZ=     | -1.7603      | ZZ=     | 27.9825 |  |
| Eigenvalues: | 26.1902     |         | 26.7232      |         | 35.2087 |  |
| 42 H         | Isotropic = | 29.8861 | Anisotropy = | 8.1399  |         |  |
| XX=          | 32.9129     | YX=     | -1.4758      | ZX=     | 3.9109  |  |
| XY=          | -2.6048     | YY=     | 25.6019      | ZY=     | 0.2641  |  |
| XZ=          | 1.9963      | YZ=     | 0.6311       | ZZ=     | 31.1436 |  |
| Eigenvalues: | 24.8170     |         | 29.5286      |         | 35.3128 |  |



Number of frequencies: 120

harmonic frequencies in  $\text{cm}^{-1}$ , reduced masses in amu,

force constants in mDyne/A, and

normal modes in cartesian coordinates: 120

IR intensities in  $\text{km/mol}$

|             |        |        |        |        |        |        |
|-------------|--------|--------|--------|--------|--------|--------|
| vibration # | 1      | 2      | 3      | 4      | 5      | 6      |
| -----       |        |        |        |        |        |        |
| frequencies | 51.09  | 66.40  | 82.15  | 89.04  | 117.01 | 142.49 |
| intensities | 0.21   | 0.03   | 1.49   | 0.41   | 0.51   | 0.81   |
| reduc. mass | 1.13   | 1.14   | 0.90   | 1.15   | 0.83   | 0.91   |
| force const | 0.00   | 0.00   | 0.00   | 0.01   | 0.01   | 0.01   |
|             |        |        |        |        |        |        |
| vibration # | 7      | 8      | 9      | 10     | 11     | 12     |
| -----       |        |        |        |        |        |        |
| frequencies | 179.38 | 201.00 | 239.75 | 244.10 | 254.55 | 266.86 |
| intensities | 1.79   | 0.58   | 1.96   | 0.87   | 2.96   | 1.74   |
| reduc. mass | 0.81   | 0.80   | 0.97   | 1.20   | 0.61   | 0.74   |
| force const | 0.02   | 0.02   | 0.03   | 0.04   | 0.02   | 0.03   |
|             |        |        |        |        |        |        |
| vibration # | 13     | 14     | 15     | 16     | 17     | 18     |
| -----       |        |        |        |        |        |        |
| frequencies | 275.72 | 279.82 | 315.42 | 321.20 | 334.15 | 360.98 |
| intensities | 2.45   | 0.34   | 1.63   | 0.26   | 0.42   | 10.16  |
| reduc. mass | 0.69   | 0.24   | 1.14   | 0.59   | 0.46   | 3.17   |
| force const | 0.03   | 0.01   | 0.07   | 0.04   | 0.03   | 0.24   |
|             |        |        |        |        |        |        |
| vibration # | 19     | 20     | 21     | 22     | 23     | 24     |
| -----       |        |        |        |        |        |        |

|             |        |        |        |        |        |        |
|-------------|--------|--------|--------|--------|--------|--------|
| frequencies | 370.57 | 399.67 | 445.17 | 450.35 | 494.22 | 508.89 |
| intensities | 1.14   | 1.85   | 6.70   | 4.10   | 7.69   | 13.00  |
| reduc. mass | 0.29   | 0.46   | 1.25   | 0.74   | 0.51   | 0.54   |
| force const | 0.02   | 0.04   | 0.15   | 0.09   | 0.07   | 0.08   |

vibration #      25    26    27    28    29    30

-----

|             |        |        |        |        |        |        |
|-------------|--------|--------|--------|--------|--------|--------|
| frequencies | 520.79 | 527.65 | 529.56 | 558.99 | 592.14 | 616.94 |
| intensities | 5.50   | 7.80   | 8.41   | 8.12   | 5.25   | 26.84  |
| reduc. mass | 2.79   | 1.23   | 0.52   | 0.57   | 1.36   | 0.52   |
| force const | 0.45   | 0.20   | 0.09   | 0.10   | 0.28   | 0.12   |

vibration #      31    32    33    34    35    36

-----

|             |        |        |        |        |        |        |
|-------------|--------|--------|--------|--------|--------|--------|
| frequencies | 631.98 | 676.29 | 700.99 | 724.33 | 727.45 | 739.22 |
| intensities | 15.94  | 2.94   | 3.68   | 19.91  | 2.78   | 23.04  |
| reduc. mass | 0.59   | 1.42   | 0.90   | 0.70   | 0.30   | 0.53   |
| force const | 0.14   | 0.38   | 0.26   | 0.21   | 0.09   | 0.17   |

vibration #      37    38    39    40    41    42

-----

|             |        |        |        |        |        |        |
|-------------|--------|--------|--------|--------|--------|--------|
| frequencies | 757.45 | 788.50 | 812.93 | 832.46 | 889.97 | 895.96 |
| intensities | 18.80  | 9.76   | 6.24   | 5.94   | 11.92  | 6.25   |
| reduc. mass | 0.74   | 1.22   | 0.43   | 2.37   | 0.51   | 0.62   |
| force const | 0.25   | 0.45   | 0.17   | 0.97   | 0.24   | 0.29   |

vibration #      43    44    45    46    47    48

-----

|             |        |        |        |         |         |         |
|-------------|--------|--------|--------|---------|---------|---------|
| frequencies | 934.63 | 940.57 | 956.51 | 1001.48 | 1015.71 | 1021.94 |
|-------------|--------|--------|--------|---------|---------|---------|

|             |      |      |       |      |       |       |
|-------------|------|------|-------|------|-------|-------|
| intensities | 1.93 | 1.67 | 21.99 | 5.10 | 12.88 | 31.09 |
| reduc. mass | 1.16 | 0.58 | 0.73  | 0.30 | 0.23  | 0.30  |
| force const | 0.59 | 0.30 | 0.40  | 0.18 | 0.14  | 0.19  |

vibration #      49    50    51    52    53    54

-----

|             |         |         |         |         |         |         |
|-------------|---------|---------|---------|---------|---------|---------|
| frequencies | 1028.37 | 1041.70 | 1053.62 | 1056.58 | 1067.76 | 1096.80 |
| intensities | 32.40   | 9.33    | 8.10    | 7.64    | 7.31    | 36.55   |
| reduc. mass | 0.48    | 0.44    | 0.83    | 0.44    | 0.36    | 0.66    |
| force const | 0.30    | 0.28    | 0.55    | 0.29    | 0.24    | 0.47    |

vibration #      55    56    57    58    59    60

-----

|             |         |         |         |         |         |         |
|-------------|---------|---------|---------|---------|---------|---------|
| frequencies | 1112.51 | 1132.84 | 1137.58 | 1148.29 | 1176.81 | 1210.70 |
| intensities | 16.34   | 13.32   | 6.53    | 22.45   | 4.17    | 23.84   |
| reduc. mass | 0.45    | 0.48    | 0.36    | 0.32    | 0.37    | 0.71    |
| force const | 0.33    | 0.36    | 0.27    | 0.25    | 0.30    | 0.61    |

vibration #      61    62    63    64    65    66

-----

|             |         |         |         |         |         |         |
|-------------|---------|---------|---------|---------|---------|---------|
| frequencies | 1250.43 | 1259.68 | 1260.91 | 1264.30 | 1279.96 | 1339.24 |
| intensities | 54.94   | 65.68   | 57.36   | 19.38   | 29.59   | 2.53    |
| reduc. mass | 1.17    | 0.32    | 0.74    | 0.23    | 0.70    | 0.58    |
| force const | 1.08    | 0.30    | 0.70    | 0.22    | 0.68    | 0.61    |

vibration #      67    68    69    70    71    72

-----

|             |         |         |         |         |         |         |
|-------------|---------|---------|---------|---------|---------|---------|
| frequencies | 1356.77 | 1390.90 | 1404.04 | 1415.05 | 1460.40 | 1480.93 |
| intensities | 57.48   | 50.44   | 19.82   | 452.14  | 52.18   | 1.48    |

|             |      |      |      |      |      |      |
|-------------|------|------|------|------|------|------|
| reduc. mass | 0.43 | 0.38 | 1.97 | 1.04 | 0.88 | 0.61 |
| force const | 0.47 | 0.44 | 2.29 | 1.23 | 1.11 | 0.79 |

vibration #      73    74    75    76    77    78

-----

|             |         |         |         |         |         |         |
|-------------|---------|---------|---------|---------|---------|---------|
| frequencies | 1502.04 | 1505.75 | 1515.25 | 1525.15 | 1544.86 | 1564.99 |
| intensities | 1.09    | 18.00   | 58.02   | 4.18    | 26.71   | 26.57   |
| reduc. mass | 0.79    | 1.63    | 0.87    | 2.43    | 0.66    | 0.76    |
| force const | 1.05    | 2.18    | 1.18    | 3.33    | 0.92    | 1.10    |

vibration #      79    80    81    82    83    84

-----

|             |         |         |         |         |         |         |
|-------------|---------|---------|---------|---------|---------|---------|
| frequencies | 1580.14 | 1602.34 | 1612.90 | 1635.55 | 1646.74 | 1648.27 |
| intensities | 16.10   | 8.52    | 8.45    | 9.34    | 96.35   | 32.37   |
| reduc. mass | 1.65    | 0.64    | 0.73    | 0.71    | 0.60    | 0.59    |
| force const | 2.43    | 0.96    | 1.12    | 1.11    | 0.95    | 0.94    |

vibration #      85    86    87    88    89    90

-----

|             |         |         |         |         |         |         |
|-------------|---------|---------|---------|---------|---------|---------|
| frequencies | 1657.25 | 1659.77 | 1660.65 | 1662.27 | 1663.41 | 1672.11 |
| intensities | 3.05    | 38.52   | 12.18   | 33.83   | 7.58    | 71.23   |
| reduc. mass | 0.36    | 0.20    | 0.26    | 0.13    | 0.13    | 0.75    |
| force const | 0.58    | 0.32    | 0.42    | 0.21    | 0.22    | 1.24    |

vibration #      91    92    93    94    95    96

-----

|             |         |         |         |         |         |         |
|-------------|---------|---------|---------|---------|---------|---------|
| frequencies | 1681.86 | 1682.79 | 1683.82 | 1699.50 | 1791.89 | 1819.63 |
| intensities | 14.46   | 13.21   | 11.45   | 28.54   | 865.61  | 128.68  |
| reduc. mass | 0.38    | 0.32    | 0.31    | 0.94    | 1.35    | 1.21    |
| force const | 0.64    | 0.53    | 0.52    | 1.59    | 2.55    | 2.37    |

| vibration # | 103     | 104     | 105     | 106     | 107     | 108     |
|-------------|---------|---------|---------|---------|---------|---------|
| -----       |         |         |         |         |         |         |
| frequencies | 3057.41 | 3088.62 | 3095.76 | 3105.22 | 3120.99 | 3124.47 |
| intensities | 625.95  | 548.09  | 184.14  | 53.15   | 223.71  | 417.89  |
| reduc. mass | 0.48    | 0.45    | 0.46    | 0.42    | 0.85    | 0.29    |
| force const | 2.64    | 2.55    | 2.62    | 2.39    | 4.89    | 1.69    |

| vibration # | 109     | 110     | 111     | 112     | 113     | 114     |
|-------------|---------|---------|---------|---------|---------|---------|
| -----       |         |         |         |         |         |         |
| frequencies | 3128.20 | 3131.86 | 3135.10 | 3135.99 | 3138.68 | 3144.25 |
| intensities | 198.30  | 281.39  | 482.43  | 408.56  | 488.62  | 340.40  |
| reduc. mass | 0.30    | 0.48    | 0.57    | 0.35    | 0.51    | 0.55    |
| force const | 1.74    | 2.79    | 3.33    | 2.03    | 2.95    | 3.20    |

| vibration # | 115     | 116     | 117     | 118     | 119     | 120     |
|-------------|---------|---------|---------|---------|---------|---------|
| -----       |         |         |         |         |         |         |
| frequencies | 3147.06 | 3149.87 | 3154.52 | 3197.46 | 3807.98 | 3858.01 |
| intensities | 335.22  | 364.91  | 388.01  | 304.05  | 522.06  | 21.90   |
| reduc. mass | 0.50    | 0.56    | 0.84    | 0.56    | 0.94    | 0.94    |
| force const | 2.89    | 3.25    | 4.93    | 3.38    | 8.03    | 8.27    |

Number of imaginary frequencies: 0

## Conformation 2

Boltzmann Population = 11.1% (relative energy = 1.04 kcal/mol)

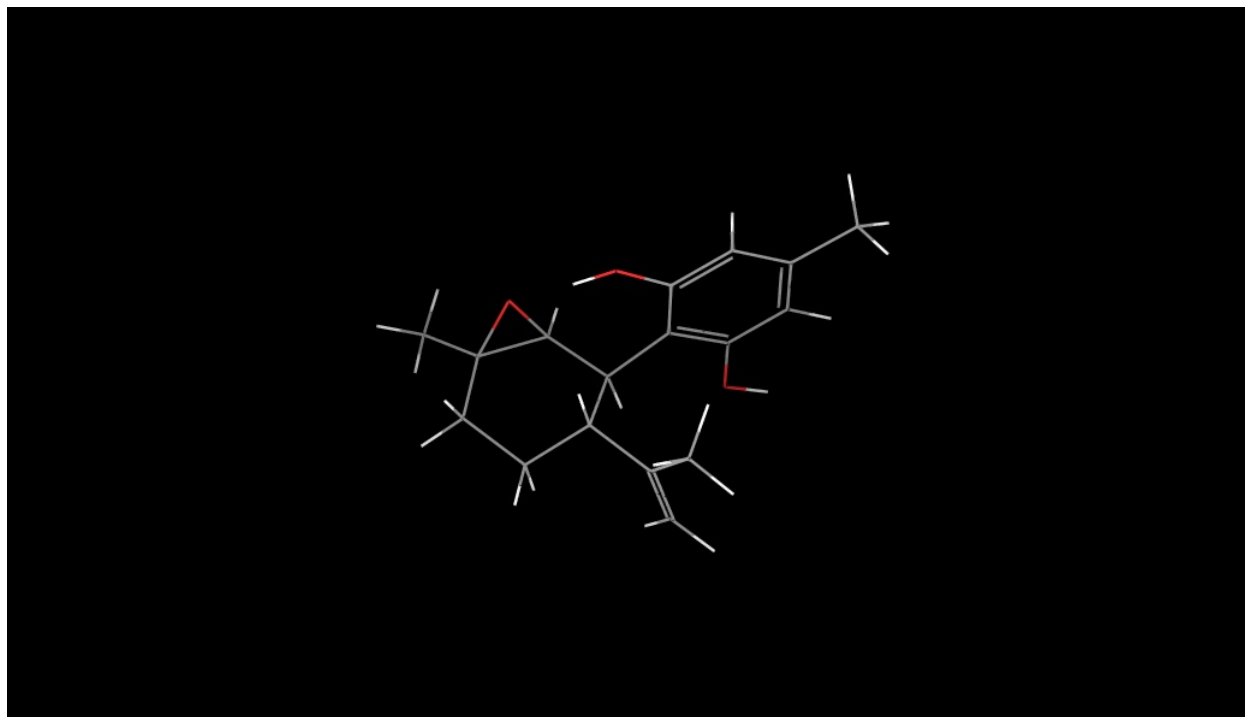

Geometries and Energy Method: M06-2X-D3/6-31G(d,p)

NMR Method: mPW1PW91/6-311+G(2d,p)

Thermodynamic properties for P = 1.00 atm, calculated at 1 temperatures

T = 298.15 K, P = 1.00 atm

Total internal energy,  $U_{\text{tot}}(\text{SCFE} + \text{ZPE} + \text{U})$ : -885.983588 hartrees

Total enthalpy,  $H_{\text{tot}}(U_{\text{tot}} + pV)$ : -885.982644 hartrees

Total Gibbs free energy,  $G_{\text{tot}}(H_{\text{tot}} - T^*S)$ : -886.044700 hartrees

Optimized Geometry:

| Center<br>Number | Atomic<br>Number | Atomic<br>Type | Coordinates (Angstroms) |           |          |
|------------------|------------------|----------------|-------------------------|-----------|----------|
|                  |                  |                | X                       | Y         | Z        |
| 1                | 6                | 0              | -1.487300               | -2.542800 | 0.095100 |
| 2                | 6                | 0              | -0.468200               | -3.564500 | 0.601800 |
| 3                | 6                | 0              | -0.527400               | -3.720600 | 2.124100 |
| 4                | 6                | 0              | -0.107300               | -2.391300 | 2.798100 |

|    |   |   |           |           |           |
|----|---|---|-----------|-----------|-----------|
| 5  | 6 | 0 | -0.816000 | -1.191100 | 2.205600  |
| 6  | 6 | 0 | -1.475700 | -1.243500 | 0.886500  |
| 7  | 6 | 0 | -1.667100 | 0.026600  | 0.097300  |
| 8  | 6 | 0 | -0.225300 | -2.470700 | 4.309900  |
| 9  | 6 | 0 | -1.442100 | -2.705900 | 4.973400  |
| 10 | 6 | 0 | -1.482600 | -2.913100 | 6.354500  |
| 11 | 6 | 0 | -0.319300 | -2.882400 | 7.112700  |
| 12 | 6 | 0 | 0.894900  | -2.629400 | 6.476100  |
| 13 | 6 | 0 | 0.932600  | -2.432200 | 5.098800  |
| 14 | 6 | 0 | 0.338800  | -4.861900 | 2.639600  |
| 15 | 6 | 0 | 1.632500  | -4.953400 | 2.333000  |
| 16 | 6 | 0 | -0.347600 | -5.857600 | 3.533000  |
| 17 | 8 | 0 | -2.631600 | -2.796800 | 4.331000  |
| 18 | 8 | 0 | 2.115700  | -2.196400 | 4.457100  |
| 19 | 6 | 0 | -0.364200 | -3.141000 | 8.596900  |
| 20 | 8 | 0 | -2.244100 | -1.271600 | 2.101800  |
| 21 | 1 | 0 | -1.298800 | -2.317300 | -0.959600 |
| 22 | 1 | 0 | -2.502400 | -2.953600 | 0.153900  |
| 23 | 1 | 0 | 0.542000  | -3.242600 | 0.317200  |
| 24 | 1 | 0 | -0.635300 | -4.532900 | 0.120800  |
| 25 | 1 | 0 | -1.565800 | -3.938200 | 2.403700  |
| 26 | 1 | 0 | 0.954300  | -2.247600 | 2.570600  |
| 27 | 1 | 0 | -0.464800 | -0.223600 | 2.566600  |
| 28 | 1 | 0 | -0.836500 | 0.171300  | -0.599400 |
| 29 | 1 | 0 | -2.593600 | -0.027300 | -0.482400 |
| 30 | 1 | 0 | -1.724900 | 0.887200  | 0.766600  |
| 31 | 1 | 0 | -2.450000 | -3.093000 | 6.811600  |
| 32 | 1 | 0 | 1.816900  | -2.589100 | 7.052200  |
| 33 | 1 | 0 | 2.245600  | -5.764300 | 2.713700  |
| 34 | 1 | 0 | 2.130200  | -4.220000 | 1.704500  |
| 35 | 1 | 0 | 0.337300  | -6.640600 | 3.866400  |
| 36 | 1 | 0 | -0.761000 | -5.352700 | 4.414200  |
| 37 | 1 | 0 | -1.189600 | -6.328700 | 3.012400  |
| 38 | 1 | 0 | -2.600300 | -2.372400 | 3.455700  |
| 39 | 1 | 0 | 2.834200  | -2.278500 | 5.093200  |
| 40 | 1 | 0 | -1.294000 | -2.768900 | 9.033100  |
| 41 | 1 | 0 | -0.308500 | -4.214700 | 8.803700  |
| 42 | 1 | 0 | 0.472600  | -2.660600 | 9.109600  |

-----

SCF GIAO Magnetic shielding tensor (ppm):

|              |          |             |          |              |          |
|--------------|----------|-------------|----------|--------------|----------|
| 1            | C        | Isotropic = | 154.5431 | Anisotropy = | 23.6897  |
| XX=          | 149.1821 | YX=         | -3.0820  | ZX=          | 2.3284   |
| XY=          | -1.8514  | YY=         | 165.8556 | ZY=          | -9.5484  |
| XZ=          | -4.8603  | YZ=         | -9.8106  | ZZ=          | 148.5918 |
| Eigenvalues: | 143.4248 |             | 149.8684 |              | 170.3363 |
| 2            | C        | Isotropic = | 154.7023 | Anisotropy = | 17.4369  |
| XX=          | 165.8775 | YX=         | 3.0864   | ZX=          | 1.1616   |
| XY=          | 0.0844   | YY=         | 155.7853 | ZY=          | 7.0222   |
| XZ=          | 2.0558   | YZ=         | 0.5685   | ZZ=          | 142.4441 |
| Eigenvalues: | 141.3854 |             | 156.3945 |              | 166.3269 |

|              |          |             |          |              |          |
|--------------|----------|-------------|----------|--------------|----------|
| 3            | C        | Isotropic = | 148.0979 | Anisotropy = | 25.7346  |
| XX=          | 157.4650 | YX=         | 12.1594  | ZX=          | 1.5474   |
| XY=          | 8.4957   | YY=         | 151.5461 | ZY=          | 3.8437   |
| XZ=          | -0.4733  | YZ=         | -3.9122  | ZZ=          | 135.2827 |
| Eigenvalues: | 135.2627 | 143.7768    | 165.2543 |              |          |
| 4            | C        | Isotropic = | 143.0414 | Anisotropy = | 31.0439  |
| XX=          | 128.7682 | YX=         | -1.0885  | ZX=          | 2.8561   |
| XY=          | -3.4803  | YY=         | 159.4335 | ZY=          | -7.3474  |
| XZ=          | 0.7494   | YZ=         | -11.8490 | ZZ=          | 140.9225 |
| Eigenvalues: | 128.4732 | 136.9137    | 163.7373 |              |          |
| 5            | C        | Isotropic = | 120.4369 | Anisotropy = | 52.7311  |
| XX=          | 95.8717  | YX=         | 12.6862  | ZX=          | -19.4727 |
| XY=          | 14.8447  | YY=         | 142.1558 | ZY=          | -7.3193  |
| XZ=          | -22.4605 | YZ=         | -15.0154 | ZZ=          | 123.2831 |
| Eigenvalues: | 83.6616  | 122.0581    | 155.5910 |              |          |
| 6            | C        | Isotropic = | 125.3084 | Anisotropy = | 55.2836  |
| XX=          | 84.6958  | YX=         | 5.9201   | ZX=          | -25.5815 |
| XY=          | 2.2799   | YY=         | 155.9270 | ZY=          | -9.1697  |
| XZ=          | -30.0792 | YZ=         | -8.0360  | ZZ=          | 135.3023 |
| Eigenvalues: | 72.3845  | 141.3765    | 162.1641 |              |          |
| 7            | C        | Isotropic = | 162.0775 | Anisotropy = | 43.3732  |
| XX=          | 169.0468 | YX=         | 9.2263   | ZX=          | -16.4626 |
| XY=          | 8.8388   | YY=         | 170.6039 | ZY=          | -19.7069 |
| XZ=          | -11.7058 | YZ=         | -17.2676 | ZZ=          | 146.5818 |
| Eigenvalues: | 134.3779 | 160.8615    | 190.9930 |              |          |
| 8            | C        | Isotropic = | 73.6738  | Anisotropy = | 124.0127 |
| XX=          | 27.1535  | YX=         | 16.7913  | ZX=          | -0.6599  |
| XY=          | 20.1951  | YY=         | 127.3989 | ZY=          | -46.5079 |
| XZ=          | -8.4465  | YZ=         | -49.3459 | ZZ=          | 66.4691  |
| Eigenvalues: | 23.1413  | 41.5312     | 156.3490 |              |          |
| 9            | C        | Isotropic = | 22.4989  | Anisotropy = | 142.1064 |
| XX=          | -20.6694 | YX=         | -11.1470 | ZX=          | -39.3548 |
| XY=          | -1.9575  | YY=         | 87.7285  | ZY=          | -55.4702 |
| XZ=          | -42.0637 | YZ=         | -59.0197 | ZZ=          | 0.4376   |
| Eigenvalues: | -64.2183 | 14.4786     | 117.2365 |              |          |
| 10           | C        | Isotropic = | 72.3919  | Anisotropy = | 119.0189 |
| XX=          | 66.6987  | YX=         | 13.0571  | ZX=          | 16.0299  |
| XY=          | 13.0812  | YY=         | 115.1183 | ZY=          | -66.1584 |
| XZ=          | 21.1359  | YZ=         | -64.2524 | ZZ=          | 35.3587  |
| Eigenvalues: | -8.0332  | 73.4711     | 151.7378 |              |          |
| 11           | C        | Isotropic = | 42.4180  | Anisotropy = | 194.8143 |
| XX=          | -51.1760 | YX=         | 21.4567  | ZX=          | 9.1862   |
| XY=          | 19.8202  | YY=         | 134.1917 | ZY=          | -68.8933 |
| XZ=          | 8.0615   | YZ=         | -68.6867 | ZZ=          | 44.2384  |
| Eigenvalues: | -56.7881 | 11.7479     | 172.2942 |              |          |
| 12           | C        | Isotropic = | 79.4969  | Anisotropy = | 96.8233  |
| XX=          | 53.0970  | YX=         | -14.4572 | ZX=          | -38.7150 |
| XY=          | -22.0588 | YY=         | 124.8666 | ZY=          | -39.3747 |
| XZ=          | -38.7719 | YZ=         | -40.6680 | ZZ=          | 60.5272  |
| Eigenvalues: | 3.9927   | 90.4523     | 144.0458 |              |          |
| 13           | C        | Isotropic = | 27.6757  | Anisotropy = | 136.1980 |
| XX=          | 20.0986  | YX=         | 19.1606  | ZX=          | 18.6808  |



|              |             |          |              |     |           |          |
|--------------|-------------|----------|--------------|-----|-----------|----------|
| XY=          | 18.0329     | YY=      | 74.3447      | ZY= | -76.8911  |          |
| XZ=          | 10.5254     | YZ=      | -72.6766     | ZZ= | -11.4161  |          |
| Eigenvalues: | -60.7376    |          | 25.2904      |     | 118.4744  |          |
| 14 C         | Isotropic = | 25.7953  | Anisotropy = |     |           | 197.6326 |
| XX=          | 30.4457     | YX=      | -88.0584     | ZX= | 92.4401   |          |
| XY=          | -93.4987    | YY=      | 31.9611      | ZY= | -0.4523   |          |
| XZ=          | 89.2397     | YZ=      | -7.1605      | ZZ= | 14.9791   |          |
| Eigenvalues: | -99.8810    |          | 19.7165      |     | 157.5504  |          |
| 15 C         | Isotropic = | 73.3089  | Anisotropy = |     |           | 130.6550 |
| XX=          | 62.1259     | YX=      | -78.5403     | ZX= | 60.7803   |          |
| XY=          | -77.2128    | YY=      | 69.8404      | ZY= | 15.3478   |          |
| XZ=          | 62.6559     | YZ=      | 20.0795      | ZZ= | 87.9605   |          |
| Eigenvalues: | -38.6042    |          | 98.1188      |     | 160.4122  |          |
| 16 C         | Isotropic = | 159.1094 | Anisotropy = |     |           | 43.0613  |
| XX=          | 160.5195    | YX=      | 13.7297      | ZX= | -20.3941  |          |
| XY=          | 8.5750      | YY=      | 151.8521     | ZY= | -5.8381   |          |
| XZ=          | -21.1938    | YZ=      | -6.8697      | ZZ= | 164.9567  |          |
| Eigenvalues: | 139.9113    |          | 149.6000     |     | 187.8170  |          |
| 17 O         | Isotropic = | 200.0228 | Anisotropy = |     |           | 87.4344  |
| XX=          | 158.7904    | YX=      | 6.4725       | ZX= | 16.9529   |          |
| XY=          | 19.9268     | YY=      | 227.6703     | ZY= | -58.9891  |          |
| XZ=          | 28.2739     | YZ=      | -14.6298     | ZZ= | 213.6077  |          |
| Eigenvalues: | 142.2983    |          | 199.4577     |     | 258.3124  |          |
| 18 O         | Isotropic = | 210.3252 | Anisotropy = |     |           | 52.0096  |
| XX=          | 168.4360    | YX=      | -6.8039      | ZX= | -9.6218   |          |
| XY=          | -6.7384     | YY=      | 225.2008     | ZY= | 2.7507    |          |
| XZ=          | -29.3438    | YZ=      | 8.2074       | ZZ= | 237.3387  |          |
| Eigenvalues: | 162.8782    |          | 223.0991     |     | 244.9983  |          |
| 19 C         | Isotropic = | 164.4697 | Anisotropy = |     |           | 40.8772  |
| XX=          | 190.0283    | YX=      | -10.4449     | ZX= | -1.2216   |          |
| XY=          | -3.1680     | YY=      | 147.8525     | ZY= | 5.7949    |          |
| XZ=          | -6.1563     | YZ=      | 7.6492       | ZZ= | 155.5283  |          |
| Eigenvalues: | 143.5774    |          | 158.1105     |     | 191.7212  |          |
| 20 O         | Isotropic = | 261.3806 | Anisotropy = |     |           | 137.1677 |
| XX=          | 329.9343    | YX=      | 12.6610      | ZX= | 3.4684    |          |
| XY=          | 36.1068     | YY=      | 264.5888     | ZY= | -119.4448 |          |
| XZ=          | 9.2418      | YZ=      | -94.6129     | ZZ= | 189.6185  |          |
| Eigenvalues: | 111.9839    |          | 319.3321     |     | 352.8257  |          |
| 21 H         | Isotropic = | 29.9395  | Anisotropy = |     |           | 8.6342   |
| XX=          | 35.4928     | YX=      | -0.3319      | ZX= | -1.3458   |          |
| XY=          | -1.2758     | YY=      | 29.4262      | ZY= | -0.9612   |          |
| XZ=          | -0.9307     | YZ=      | -0.6820      | ZZ= | 24.8996   |          |
| Eigenvalues: | 24.6082     |          | 29.5147      |     | 35.6956   |          |
| 22 H         | Isotropic = | 29.9392  | Anisotropy = |     |           | 7.8707   |
| XX=          | 28.4923     | YX=      | 1.1052       | ZX= | 3.3873    |          |
| XY=          | -0.3806     | YY=      | 28.1305      | ZY= | -0.4847   |          |
| XZ=          | 3.9148      | YZ=      | 0.1797       | ZZ= | 33.1947   |          |
| Eigenvalues: | 26.4119     |          | 28.2193      |     | 35.1863   |          |
| 23 H         | Isotropic = | 30.2846  | Anisotropy = |     |           | 7.2158   |
| XX=          | 30.4832     | YX=      | -0.1063      | ZX= | -1.7619   |          |
| XY=          | -0.6198     | YY=      | 31.3226      | ZY= | 5.0907    |          |
| XZ=          | -1.0641     | YZ=      | 3.8562       | ZZ= | 29.0480   |          |

|              |             |         |              |         |         |
|--------------|-------------|---------|--------------|---------|---------|
| Eigenvalues: | 25.4081     | 30.3507 | 35.0952      |         |         |
| 24 H         | Isotropic = | 30.2757 | Anisotropy = | 9.1967  |         |
| XX=          | 30.5345     | YX=     | -1.5513      | ZX=     | 2.0271  |
| XY=          | -2.4268     | YY=     | 32.9575      | ZY=     | -4.0228 |
| XZ=          | 2.8612      | YZ=     | -3.7780      | ZZ=     | 27.3353 |
| Eigenvalues: | 24.9960     | 29.4244 | 36.4069      |         |         |
| 25 H         | Isotropic = | 29.2424 | Anisotropy = | 4.0883  |         |
| XX=          | 28.7290     | YX=     | 0.7744       | ZX=     | -2.4832 |
| XY=          | -1.6762     | YY=     | 28.8673      | ZY=     | 0.0142  |
| XZ=          | -2.3789     | YZ=     | -0.3052      | ZZ=     | 30.1310 |
| Eigenvalues: | 26.8026     | 28.9568 | 31.9680      |         |         |
| 26 H         | Isotropic = | 27.9745 | Anisotropy = | 8.7824  |         |
| XX=          | 29.1382     | YX=     | 0.7803       | ZX=     | 3.5071  |
| XY=          | 2.0739      | YY=     | 25.6855      | ZY=     | 3.6305  |
| XZ=          | 3.1135      | YZ=     | 2.9474       | ZZ=     | 29.0999 |
| Eigenvalues: | 23.6216     | 26.4725 | 33.8294      |         |         |
| 27 H         | Isotropic = | 28.8221 | Anisotropy = | 9.9960  |         |
| XX=          | 26.1392     | YX=     | 3.7778       | ZX=     | 0.2589  |
| XY=          | 2.1594      | YY=     | 28.8105      | ZY=     | -6.0123 |
| XZ=          | 2.2256      | YZ=     | -4.1169      | ZZ=     | 31.5167 |
| Eigenvalues: | 22.3391     | 28.6412 | 35.4862      |         |         |
| 28 H         | Isotropic = | 30.3385 | Anisotropy = | 10.1725 |         |
| XX=          | 32.1177     | YX=     | -0.6257      | ZX=     | -5.4572 |
| XY=          | 1.2181      | YY=     | 27.6123      | ZY=     | 0.0057  |
| XZ=          | -5.3476     | YZ=     | 0.7433       | ZZ=     | 31.2857 |
| Eigenvalues: | 26.1303     | 27.7651 | 37.1202      |         |         |
| 29 H         | Isotropic = | 30.1428 | Anisotropy = | 9.5054  |         |
| XX=          | 33.2117     | YX=     | 3.7797       | ZX=     | 2.5734  |
| XY=          | 5.0630      | YY=     | 29.2812      | ZY=     | 0.8910  |
| XZ=          | 1.0575      | YZ=     | 0.2531       | ZZ=     | 27.9355 |
| Eigenvalues: | 26.2192     | 27.7294 | 36.4797      |         |         |
| 30 H         | Isotropic = | 31.1716 | Anisotropy = | 10.5869 |         |
| XX=          | 29.6339     | YX=     | 1.3332       | ZX=     | -0.7774 |
| XY=          | 1.2743      | YY=     | 35.0729      | ZY=     | -5.2716 |
| XZ=          | -0.6715     | YZ=     | -5.0341      | ZZ=     | 28.8078 |
| Eigenvalues: | 25.9100     | 29.3751 | 38.2295      |         |         |
| 31 H         | Isotropic = | 25.1818 | Anisotropy = | 7.3786  |         |
| XX=          | 29.8692     | YX=     | -0.4235      | ZX=     | 1.4152  |
| XY=          | -0.5358     | YY=     | 22.6214      | ZY=     | 1.5795  |
| XZ=          | 1.0990      | YZ=     | 1.2218       | ZZ=     | 23.0547 |
| Eigenvalues: | 21.2558     | 24.1887 | 30.1008      |         |         |
| 32 H         | Isotropic = | 25.8307 | Anisotropy = | 6.6402  |         |
| XX=          | 28.5649     | YX=     | -2.1840      | ZX=     | -1.7610 |
| XY=          | -2.0755     | YY=     | 23.0248      | ZY=     | 1.5897  |
| XZ=          | -1.2880     | YZ=     | 1.9432       | ZZ=     | 25.9025 |
| Eigenvalues: | 21.8969     | 25.3378 | 30.2576      |         |         |
| 33 H         | Isotropic = | 26.7623 | Anisotropy = | 5.7842  |         |
| XX=          | 24.4644     | YX=     | -1.3670      | ZX=     | -0.1413 |
| XY=          | -0.2842     | YY=     | 29.1010      | ZY=     | 1.4773  |
| XZ=          | 1.7726      | YZ=     | 3.3587       | ZZ=     | 26.7214 |
| Eigenvalues: | 23.6438     | 26.0247 | 30.6184      |         |         |
| 34 H         | Isotropic = | 26.6817 | Anisotropy = | 8.4486  |         |

|              |             |         |              |     |         |         |  |
|--------------|-------------|---------|--------------|-----|---------|---------|--|
| XX=          | 24.4875     | YX=     | 0.5330       | ZX= | 2.7766  |         |  |
| XY=          | -1.9582     | YY=     | 29.5415      | ZY= | 6.1471  |         |  |
| XZ=          | 0.6863      | YZ=     | 2.1722       | ZZ= | 26.0162 |         |  |
| Eigenvalues: | 21.9333     |         | 25.7977      |     | 32.3141 |         |  |
| 35 H         | Isotropic = | 30.5102 | Anisotropy = |     |         | 8.7874  |  |
| XX=          | 29.7682     | YX=     | 4.7328       | ZX= | -1.1414 |         |  |
| XY=          | 2.8461      | YY=     | 33.2347      | ZY= | -0.6913 |         |  |
| XZ=          | -2.2488     | YZ=     | -2.6893      | ZZ= | 28.5276 |         |  |
| Eigenvalues: | 27.0302     |         | 28.1319      |     | 36.3684 |         |  |
| 36 H         | Isotropic = | 30.5779 | Anisotropy = |     |         | 7.5773  |  |
| XX=          | 30.1383     | YX=     | -2.6425      | ZX= | -3.2037 |         |  |
| XY=          | -3.7041     | YY=     | 33.4126      | ZY= | -3.7726 |         |  |
| XZ=          | -1.3467     | YZ=     | -2.0135      | ZZ= | 28.1826 |         |  |
| Eigenvalues: | 24.6668     |         | 31.4374      |     | 35.6294 |         |  |
| 37 H         | Isotropic = | 30.2700 | Anisotropy = |     |         | 8.2432  |  |
| XX=          | 27.8462     | YX=     | 0.5048       | ZX= | 0.5727  |         |  |
| XY=          | 0.2001      | YY=     | 28.3923      | ZY= | -3.5373 |         |  |
| XZ=          | 1.5303      | YZ=     | -2.1266      | ZZ= | 34.5715 |         |  |
| Eigenvalues: | 26.7795     |         | 28.2650      |     | 35.7655 |         |  |
| 38 H         | Isotropic = | 24.1146 | Anisotropy = |     |         | 24.8633 |  |
| XX=          | 36.9590     | YX=     | 1.8847       | ZX= | -8.9471 |         |  |
| XY=          | 5.4182      | YY=     | 15.3178      | ZY= | 4.5723  |         |  |
| XZ=          | -8.1978     | YZ=     | 3.2135       | ZZ= | 20.0670 |         |  |
| Eigenvalues: | 10.7983     |         | 20.8554      |     | 40.6901 |         |  |
| 39 H         | Isotropic = | 28.2608 | Anisotropy = |     |         | 14.4040 |  |
| XX=          | 31.9963     | YX=     | 1.2833       | ZX= | 4.4188  |         |  |
| XY=          | 2.5010      | YY=     | 23.2273      | ZY= | 5.8724  |         |  |
| XZ=          | 6.1674      | YZ=     | 4.7855       | ZZ= | 29.5588 |         |  |
| Eigenvalues: | 20.0944     |         | 26.8245      |     | 37.8634 |         |  |
| 40 H         | Isotropic = | 29.6237 | Anisotropy = |     |         | 8.2105  |  |
| XX=          | 30.8838     | YX=     | -3.3539      | ZX= | -1.6289 |         |  |
| XY=          | -2.4900     | YY=     | 30.3892      | ZY= | 4.2391  |         |  |
| XZ=          | 0.2514      | YZ=     | 3.7076       | ZZ= | 27.5980 |         |  |
| Eigenvalues: | 24.5486     |         | 29.2250      |     | 35.0974 |         |  |
| 41 H         | Isotropic = | 29.3600 | Anisotropy = |     |         | 8.6736  |  |
| XX=          | 31.9136     | YX=     | 2.1937       | ZX= | -2.7563 |         |  |
| XY=          | 3.3662      | YY=     | 28.0236      | ZY= | -2.0778 |         |  |
| XZ=          | -3.1574     | YZ=     | -1.8371      | ZZ= | 28.1426 |         |  |
| Eigenvalues: | 26.1223     |         | 26.8152      |     | 35.1424 |         |  |
| 42 H         | Isotropic = | 29.8704 | Anisotropy = |     |         | 8.1445  |  |
| XX=          | 32.9584     | YX=     | -1.3138      | ZX= | 3.9490  |         |  |
| XY=          | -2.4800     | YY=     | 25.6042      | ZY= | 0.4800  |         |  |
| XZ=          | 2.0615      | YZ=     | 0.8001       | ZZ= | 31.0487 |         |  |
| Eigenvalues: | 24.8124     |         | 29.4988      |     | 35.3001 |         |  |

Number of frequencies: 120

harmonic frequencies in  $\text{cm}^{-1}$ , reduced masses in amu,

force constants in mDyne/A, and

normal modes in cartesian coordinates: 120

IR intensities in  $\text{km/mol}$

|             |        |        |        |        |        |        |
|-------------|--------|--------|--------|--------|--------|--------|
| vibration # | 1      | 2      | 3      | 4      | 5      | 6      |
| -----       |        |        |        |        |        |        |
| frequencies | 59.14  | 87.68  | 94.71  | 109.12 | 126.58 | 138.04 |
| intensities | 0.61   | 0.25   | 1.41   | 0.83   | 0.79   | 3.02   |
| reduc. mass | 1.40   | 0.84   | 1.09   | 1.32   | 0.28   | 1.29   |
| force const | 0.00   | 0.00   | 0.01   | 0.01   | 0.00   | 0.01   |
|             |        |        |        |        |        |        |
| vibration # | 7      | 8      | 9      | 10     | 11     | 12     |
| -----       |        |        |        |        |        |        |
| frequencies | 165.66 | 192.76 | 222.97 | 246.86 | 253.37 | 266.47 |
| intensities | 0.69   | 0.55   | 1.10   | 0.95   | 6.21   | 6.14   |
| reduc. mass | 0.73   | 0.76   | 1.48   | 0.68   | 0.71   | 1.31   |
| force const | 0.01   | 0.02   | 0.04   | 0.02   | 0.03   | 0.05   |
|             |        |        |        |        |        |        |
| vibration # | 13     | 14     | 15     | 16     | 17     | 18     |
| -----       |        |        |        |        |        |        |
| frequencies | 268.27 | 294.19 | 298.92 | 305.26 | 314.60 | 343.16 |
| intensities | 0.58   | 3.40   | 1.43   | 0.96   | 0.27   | 7.97   |
| reduc. mass | 0.89   | 0.27   | 1.24   | 0.32   | 0.30   | 1.35   |
| force const | 0.04   | 0.01   | 0.07   | 0.02   | 0.02   | 0.09   |
|             |        |        |        |        |        |        |
| vibration # | 19     | 20     | 21     | 22     | 23     | 24     |
| -----       |        |        |        |        |        |        |

|             |        |        |        |        |        |        |
|-------------|--------|--------|--------|--------|--------|--------|
| frequencies | 354.19 | 401.20 | 420.57 | 450.34 | 470.29 | 495.73 |
| intensities | 4.34   | 1.78   | 6.41   | 2.54   | 20.86  | 10.94  |
| reduc. mass | 0.77   | 0.55   | 0.49   | 0.68   | 0.51   | 0.79   |
| force const | 0.06   | 0.05   | 0.05   | 0.08   | 0.07   | 0.11   |
| vibration # | 25     | 26     | 27     | 28     | 29     | 30     |

-----

|             |        |        |        |        |        |        |
|-------------|--------|--------|--------|--------|--------|--------|
| frequencies | 520.48 | 524.23 | 543.65 | 556.16 | 565.43 | 602.39 |
| intensities | 8.82   | 13.83  | 3.00   | 23.71  | 43.32  | 25.99  |
| reduc. mass | 0.47   | 2.09   | 0.53   | 0.56   | 0.49   | 2.16   |
| force const | 0.08   | 0.34   | 0.09   | 0.10   | 0.09   | 0.46   |

|             |    |    |    |    |    |    |
|-------------|----|----|----|----|----|----|
| vibration # | 31 | 32 | 33 | 34 | 35 | 36 |
|-------------|----|----|----|----|----|----|

-----

|             |        |        |        |        |        |        |
|-------------|--------|--------|--------|--------|--------|--------|
| frequencies | 649.40 | 664.05 | 691.94 | 706.41 | 709.52 | 717.73 |
| intensities | 79.81  | 29.64  | 9.15   | 5.34   | 15.29  | 3.07   |
| reduc. mass | 0.49   | 0.76   | 1.11   | 0.82   | 0.91   | 0.36   |
| force const | 0.12   | 0.20   | 0.31   | 0.24   | 0.27   | 0.11   |

|             |    |    |    |    |    |    |
|-------------|----|----|----|----|----|----|
| vibration # | 37 | 38 | 39 | 40 | 41 | 42 |
|-------------|----|----|----|----|----|----|

-----

|             |        |        |        |        |        |        |
|-------------|--------|--------|--------|--------|--------|--------|
| frequencies | 746.37 | 807.49 | 819.33 | 851.15 | 872.10 | 932.41 |
| intensities | 16.03  | 1.86   | 4.63   | 6.03   | 12.20  | 3.30   |
| reduc. mass | 0.73   | 0.99   | 1.84   | 0.75   | 0.61   | 0.75   |
| force const | 0.24   | 0.38   | 0.73   | 0.32   | 0.27   | 0.39   |

|             |    |    |    |    |    |    |
|-------------|----|----|----|----|----|----|
| vibration # | 43 | 44 | 45 | 46 | 47 | 48 |
|-------------|----|----|----|----|----|----|

-----

|             |        |        |        |        |         |         |
|-------------|--------|--------|--------|--------|---------|---------|
| frequencies | 938.22 | 951.95 | 956.96 | 988.32 | 1010.25 | 1016.16 |
| intensities | 3.48   | 23.22  | 16.52  | 9.79   | 0.43    | 14.85   |

|             |      |      |      |      |      |      |
|-------------|------|------|------|------|------|------|
| reduc. mass | 0.45 | 0.98 | 0.31 | 0.30 | 0.22 | 0.28 |
| force const | 0.24 | 0.52 | 0.17 | 0.17 | 0.13 | 0.17 |

vibration #      49    50    51    52    53    54

-----

|             |         |         |         |         |         |         |
|-------------|---------|---------|---------|---------|---------|---------|
| frequencies | 1030.16 | 1046.38 | 1050.01 | 1054.22 | 1056.75 | 1093.60 |
| intensities | 23.64   | 2.86    | 24.94   | 4.21    | 33.93   | 8.92    |
| reduc. mass | 0.50    | 0.55    | 0.34    | 0.26    | 0.31    | 0.60    |
| force const | 0.31    | 0.35    | 0.22    | 0.17    | 0.20    | 0.43    |

vibration #      55    56    57    58    59    60

-----

|             |         |         |         |         |         |         |
|-------------|---------|---------|---------|---------|---------|---------|
| frequencies | 1113.28 | 1132.88 | 1143.29 | 1153.81 | 1164.77 | 1210.00 |
| intensities | 28.74   | 8.16    | 6.58    | 53.68   | 54.09   | 14.54   |
| reduc. mass | 0.39    | 0.56    | 0.44    | 0.71    | 0.36    | 0.32    |
| force const | 0.29    | 0.42    | 0.34    | 0.56    | 0.28    | 0.28    |

vibration #      61    62    63    64    65    66

-----

|             |         |         |         |         |         |         |
|-------------|---------|---------|---------|---------|---------|---------|
| frequencies | 1215.04 | 1228.28 | 1253.56 | 1259.29 | 1305.87 | 1321.46 |
| intensities | 108.41  | 27.30   | 65.38   | 51.58   | 43.68   | 90.20   |
| reduc. mass | 1.20    | 0.56    | 0.40    | 0.37    | 0.67    | 0.53    |
| force const | 1.04    | 0.49    | 0.37    | 0.35    | 0.67    | 0.54    |

H42    Z    -0.01265    0.01193    -0.00183    0.01660    -0.13758    0.01403

vibration #      67    68    69    70    71    72

-----

|             |         |         |         |         |         |         |
|-------------|---------|---------|---------|---------|---------|---------|
| frequencies | 1366.62 | 1400.37 | 1401.62 | 1422.62 | 1435.28 | 1484.26 |
|-------------|---------|---------|---------|---------|---------|---------|

intensities 24.04 215.51 146.05 201.90 88.15 10.81

reduc. mass 0.51 0.44 0.30 1.15 0.52 1.44

force const 0.56 0.51 0.35 1.37 0.63 1.87

vibration # 73 74 75 76 77 78

-----

frequencies 1497.21 1505.56 1512.09 1513.98 1526.13 1531.11

intensities 7.14 29.86 77.59 82.28 23.13 59.43

reduc. mass 0.62 0.64 1.00 0.86 0.94 0.72

force const 0.82 0.85 1.35 1.16 1.29 1.00

vibration # 79 80 81 82 83 84

-----

frequencies 1540.40 1566.52 1587.60 1617.72 1629.26 1632.44

intensities 36.95 120.02 18.07 57.25 50.98 53.63

reduc. mass 0.57 0.97 0.52 0.26 0.23 0.38

force const 0.79 1.41 0.78 0.40 0.35 0.60

vibration # 85 86 87 88 89 90

-----

frequencies 1641.26 1649.60 1656.06 1658.48 1660.43 1665.29

intensities 6.60 29.31 33.09 72.18 12.61 2.85

reduc. mass 0.52 1.04 0.13 0.37 0.34 0.35

force const 0.83 1.67 0.20 0.60 0.56 0.57

vibration # 91 92 93 94 95 96

-----

frequencies 1669.60 1670.15 1672.21 1687.26 1687.79 1803.55

intensities 18.74 6.85 14.40 78.99 24.19 854.83

|             |      |      |      |      |      |      |
|-------------|------|------|------|------|------|------|
| reduc. mass | 0.13 | 0.27 | 0.24 | 0.55 | 0.38 | 1.63 |
| force const | 0.21 | 0.44 | 0.40 | 0.93 | 0.64 | 3.12 |

vibration #      97    98    99    100    101    102

-----

|             |         |         |         |         |         |         |
|-------------|---------|---------|---------|---------|---------|---------|
| frequencies | 1834.94 | 1889.25 | 3019.05 | 3023.29 | 3028.79 | 3049.45 |
|-------------|---------|---------|---------|---------|---------|---------|

|             |        |       |        |        |        |        |
|-------------|--------|-------|--------|--------|--------|--------|
| intensities | 370.85 | 20.27 | 233.88 | 490.19 | 587.60 | 564.50 |
|-------------|--------|-------|--------|--------|--------|--------|

|             |      |      |      |      |      |      |
|-------------|------|------|------|------|------|------|
| reduc. mass | 1.35 | 0.87 | 0.30 | 0.31 | 0.31 | 0.45 |
|-------------|------|------|------|------|------|------|

|             |      |      |      |      |      |      |
|-------------|------|------|------|------|------|------|
| force const | 2.68 | 1.83 | 1.63 | 1.67 | 1.67 | 2.47 |
|-------------|------|------|------|------|------|------|

vibration #      103    104    105    106    107    108

-----

|             |         |         |         |         |         |         |
|-------------|---------|---------|---------|---------|---------|---------|
| frequencies | 3057.36 | 3076.42 | 3077.12 | 3104.37 | 3106.12 | 3117.91 |
|-------------|---------|---------|---------|---------|---------|---------|

|             |        |        |        |        |       |        |
|-------------|--------|--------|--------|--------|-------|--------|
| intensities | 738.73 | 340.33 | 155.88 | 386.97 | 80.28 | 507.92 |
|-------------|--------|--------|--------|--------|-------|--------|

|             |      |      |      |      |      |      |
|-------------|------|------|------|------|------|------|
| reduc. mass | 0.42 | 0.83 | 0.68 | 0.35 | 0.27 | 0.44 |
|-------------|------|------|------|------|------|------|

|             |      |      |      |      |      |      |
|-------------|------|------|------|------|------|------|
| force const | 2.32 | 4.64 | 3.80 | 1.97 | 1.52 | 2.53 |
|-------------|------|------|------|------|------|------|

vibration #      109    110    111    112    113    114

-----

|             |         |         |         |         |         |         |
|-------------|---------|---------|---------|---------|---------|---------|
| frequencies | 3125.57 | 3130.48 | 3135.57 | 3138.04 | 3145.35 | 3148.29 |
|-------------|---------|---------|---------|---------|---------|---------|

|             |        |        |        |        |        |       |
|-------------|--------|--------|--------|--------|--------|-------|
| intensities | 386.03 | 135.46 | 447.48 | 628.84 | 575.20 | 78.91 |
|-------------|--------|--------|--------|--------|--------|-------|

|             |      |      |      |      |      |      |
|-------------|------|------|------|------|------|------|
| reduc. mass | 0.47 | 0.43 | 0.46 | 0.47 | 0.29 | 0.26 |
|-------------|------|------|------|------|------|------|

|             |      |      |      |      |      |      |
|-------------|------|------|------|------|------|------|
| force const | 2.69 | 2.48 | 2.69 | 2.72 | 1.67 | 1.53 |
|-------------|------|------|------|------|------|------|

vibration #      115    116    117    118    119    120

-----

|             |         |         |         |         |         |         |
|-------------|---------|---------|---------|---------|---------|---------|
| frequencies | 3152.63 | 3154.56 | 3164.94 | 3195.81 | 3826.30 | 3851.07 |
|-------------|---------|---------|---------|---------|---------|---------|

|             |        |        |        |        |       |        |
|-------------|--------|--------|--------|--------|-------|--------|
| intensities | 172.89 | 554.20 | 120.91 | 330.36 | 78.65 | 131.86 |
|-------------|--------|--------|--------|--------|-------|--------|

|             |      |      |      |      |      |      |
|-------------|------|------|------|------|------|------|
| reduc. mass | 0.35 | 0.48 | 0.59 | 0.56 | 0.95 | 0.95 |
|-------------|------|------|------|------|------|------|



force const    2.06   2.79   3.48   3.36   8.15   8.26  
C1    X   0.00075 0.00047 0.00151 -0.00003 -0.00030 -0.00002  
C1    Y   0.00028 0.00092 -0.00481 -0.00052 0.00002 -0.00007

Number of imaginary frequencies: 0

### Conformation 3

Boltzmann Population = 21.3% (relative energy = 0.65 kcal/mol)

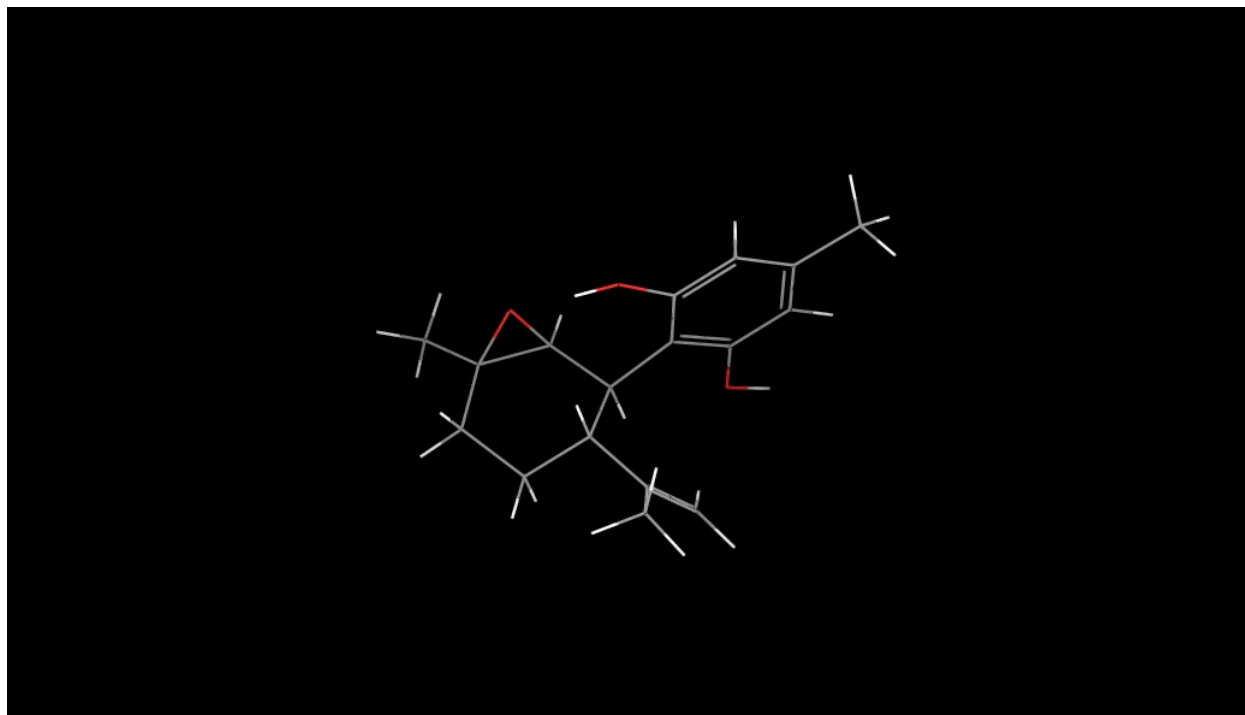

Geometries and Energy Method: M06-2X-D3/6-31G(d,p)

NMR Method: mPW1PW91/6-311+G(2d,p)

Thermodynamic properties for P = 1.00 atm, calculated at 1 temperatures

T = 298.15 K, P = 1.00 atm

Total internal energy, Utot (SCFE + ZPE + U): -885.954634 hartrees

Total enthalpy, Htot (Utot + pV): -885.953690 hartrees

Total Gibbs free energy, Gtot (Htot - T\*S): -886.015730 hartrees

Optimized Geometry:

| Center Number | Atomic Number | Atomic Type | Coordinates (Angstroms) |           |          |
|---------------|---------------|-------------|-------------------------|-----------|----------|
|               |               |             | X                       | Y         | Z        |
| 1             | 6             | 0           | -1.399900               | -2.489200 | 0.087300 |
| 2             | 6             | 0           | -0.402400               | -3.531000 | 0.594800 |
| 3             | 6             | 0           | -0.500400               | -3.733500 | 2.115300 |
| 4             | 6             | 0           | -0.069100               | -2.433300 | 2.827300 |
| 5             | 6             | 0           | -0.772400               | -1.217300 | 2.256300 |
| 6             | 6             | 0           | -1.415400               | -1.223400 | 0.928900 |

|    |   |   |           |           |           |
|----|---|---|-----------|-----------|-----------|
| 7  | 6 | 0 | -1.611100 | 0.075200  | 0.188900  |
| 8  | 6 | 0 | -0.214800 | -2.504400 | 4.337900  |
| 9  | 6 | 0 | -1.432600 | -2.788200 | 4.978400  |
| 10 | 6 | 0 | -1.498600 | -2.953600 | 6.363500  |
| 11 | 6 | 0 | -0.363700 | -2.816800 | 7.151600  |
| 12 | 6 | 0 | 0.847100  | -2.494700 | 6.539000  |
| 13 | 6 | 0 | 0.909300  | -2.343700 | 5.157700  |
| 14 | 6 | 0 | 0.293100  | -4.957500 | 2.533000  |
| 15 | 6 | 0 | 1.559200  | -4.916700 | 2.946800  |
| 16 | 6 | 0 | -0.461000 | -6.256100 | 2.419800  |
| 17 | 8 | 0 | -2.602200 | -2.947400 | 4.308200  |
| 18 | 8 | 0 | 2.091100  | -2.029700 | 4.540100  |
| 19 | 6 | 0 | -0.433100 | -3.026700 | 8.642500  |
| 20 | 8 | 0 | -2.197900 | -1.308600 | 2.132600  |
| 21 | 1 | 0 | -1.168600 | -2.223100 | -0.949300 |
| 22 | 1 | 0 | -2.417200 | -2.898900 | 0.089800  |
| 23 | 1 | 0 | 0.622100  | -3.213900 | 0.361600  |
| 24 | 1 | 0 | -0.562600 | -4.480200 | 0.073300  |
| 25 | 1 | 0 | -1.550900 | -3.934400 | 2.359300  |
| 26 | 1 | 0 | 0.993100  | -2.275600 | 2.612300  |
| 27 | 1 | 0 | -0.434300 | -0.261900 | 2.659700  |
| 28 | 1 | 0 | -0.771800 | 0.259400  | -0.487700 |
| 29 | 1 | 0 | -2.527800 | 0.034100  | -0.407100 |
| 30 | 1 | 0 | -1.690700 | 0.906400  | 0.892400  |
| 31 | 1 | 0 | -2.465600 | -3.178000 | 6.801300  |
| 32 | 1 | 0 | 1.745600  | -2.362400 | 7.138300  |
| 33 | 1 | 0 | 2.085300  | -5.833000 | 3.198100  |
| 34 | 1 | 0 | 2.105500  | -3.988500 | 3.079500  |
| 35 | 1 | 0 | 0.185100  | -7.116100 | 2.608200  |
| 36 | 1 | 0 | -1.283900 | -6.274200 | 3.143600  |
| 37 | 1 | 0 | -0.910100 | -6.373500 | 1.426700  |
| 38 | 1 | 0 | -2.581300 | -2.486100 | 3.452100  |
| 39 | 1 | 0 | 2.790100  | -2.012100 | 5.202800  |
| 40 | 1 | 0 | -1.409100 | -2.733600 | 9.036200  |
| 41 | 1 | 0 | -0.279000 | -4.081700 | 8.891500  |
| 42 | 1 | 0 | 0.334800  | -2.447800 | 9.161500  |

-----

SCF GIAO Magnetic shielding tensor (ppm):

|              |          |             |          |              |          |
|--------------|----------|-------------|----------|--------------|----------|
| 1            | C        | Isotropic = | 154.5238 | Anisotropy = | 22.9744  |
| XX=          | 149.4141 | YX=         | -4.5724  | ZX=          | 1.4773   |
| XY=          | -2.2635  | YY=         | 168.0487 | ZY=          | -5.1151  |
| XZ=          | -4.6663  | YZ=         | -6.1496  | ZZ=          | 146.1087 |
| Eigenvalues: | 143.7146 | 150.0167    | 169.8401 |              |          |
| 2            | C        | Isotropic = | 153.4411 | Anisotropy = | 19.9031  |
| XX=          | 165.9457 | YX=         | 6.3524   | ZX=          | -4.1831  |
| XY=          | -1.1055  | YY=         | 145.2294 | ZY=          | 9.1815   |
| XZ=          | -2.7494  | YZ=         | 5.0478   | ZZ=          | 149.1481 |
| Eigenvalues: | 139.1526 | 154.4609    | 166.7098 |              |          |
| 3            | C        | Isotropic = | 146.3161 | Anisotropy = | 24.1424  |
| XX=          | 149.5996 | YX=         | 11.1786  | ZX=          | -1.0218  |

|              |             |          |              |     |          |          |
|--------------|-------------|----------|--------------|-----|----------|----------|
| XY=          | 4.8369      | YY=      | 157.2196     | ZY= | -0.3507  |          |
| XZ=          | -4.4618     | YZ=      | -0.9246      | ZZ= | 132.1290 |          |
| Eigenvalues: | 131.6934    |          | 144.8438     |     | 162.4110 |          |
| 4 C          | Isotropic = | 148.6213 | Anisotropy = |     |          | 20.7788  |
| XX=          | 147.6038    | YX=      | -0.4179      | ZX= | -0.1826  |          |
| XY=          | -10.7451    | YY=      | 159.4551     | ZY= | -2.7747  |          |
| XZ=          | -4.2796     | YZ=      | -8.1849      | ZZ= | 138.8048 |          |
| Eigenvalues: | 136.2521    |          | 147.1379     |     | 162.4738 |          |
| 5 C          | Isotropic = | 119.7354 | Anisotropy = |     |          | 52.5392  |
| XX=          | 91.5268     | YX=      | 11.0391      | ZX= | -15.3115 |          |
| XY=          | 14.8845     | YY=      | 147.1315     | ZY= | -5.1174  |          |
| XZ=          | -16.2491    | YZ=      | -12.9544     | ZZ= | 120.5480 |          |
| Eigenvalues: | 83.4603     |          | 120.9845     |     | 154.7616 |          |
| 6 C          | Isotropic = | 125.3981 | Anisotropy = |     |          | 55.5357  |
| XX=          | 81.9890     | YX=      | 3.8227       | ZX= | -21.3866 |          |
| XY=          | 1.3754      | YY=      | 159.6971     | ZY= | -6.8667  |          |
| XZ=          | -26.4606    | YZ=      | -6.4091      | ZZ= | 134.5081 |          |
| Eigenvalues: | 72.7252     |          | 141.0471     |     | 162.4219 |          |
| 7 C          | Isotropic = | 162.2278 | Anisotropy = |     |          | 43.3292  |
| XX=          | 166.2369    | YX=      | 11.1103      | ZX= | -14.2177 |          |
| XY=          | 9.5178      | YY=      | 178.7878     | ZY= | -14.9923 |          |
| XZ=          | -9.8882     | YZ=      | -12.4889     | ZZ= | 141.6588 |          |
| Eigenvalues: | 134.6949    |          | 160.8746     |     | 191.1140 |          |
| 8 C          | Isotropic = | 72.7359  | Anisotropy = |     |          | 125.0285 |
| XX=          | 25.2708     | YX=      | 15.3799      | ZX= | 2.5186   |          |
| XY=          | 16.8949     | YY=      | 146.7202     | ZY= | -27.1918 |          |
| XZ=          | -3.0906     | YZ=      | -29.6779     | ZZ= | 46.2166  |          |
| Eigenvalues: | 22.4995     |          | 39.6199      |     | 156.0882 |          |
| 9 C          | Isotropic = | 22.6122  | Anisotropy = |     |          | 140.0143 |
| XX=          | -20.9173    | YX=      | -6.4704      | ZX= | -40.3764 |          |
| XY=          | 2.9272      | YY=      | 107.4975     | ZY= | -30.4129 |          |
| XZ=          | -39.5238    | YZ=      | -35.0503     | ZZ= | -18.7435 |          |
| Eigenvalues: | -63.3168    |          | 15.1984      |     | 115.9551 |          |
| 10 C         | Isotropic = | 71.5020  | Anisotropy = |     |          | 119.4901 |
| XX=          | 66.5743     | YX=      | 7.8677       | ZX= | 18.5221  |          |
| XY=          | 7.5407      | YY=      | 139.7253     | ZY= | -42.4884 |          |
| XZ=          | 23.2532     | YZ=      | -38.2388     | ZZ= | 8.2062   |          |
| Eigenvalues: | -9.6573     |          | 73.0012      |     | 151.1620 |          |
| 11 C         | Isotropic = | 42.9384  | Anisotropy = |     |          | 193.7627 |
| XX=          | -50.2916    | YX=      | 16.6511      | ZX= | 15.0008  |          |
| XY=          | 15.5963     | YY=      | 161.4513     | ZY= | -39.9503 |          |
| XZ=          | 13.6780     | YZ=      | -38.4845     | ZZ= | 17.6554  |          |
| Eigenvalues: | -55.9583    |          | 12.6598      |     | 172.1135 |          |
| 12 C         | Isotropic = | 79.6704  | Anisotropy = |     |          | 96.7621  |
| XX=          | 52.6194     | YX=      | -4.9850      | ZX= | -41.1011 |          |
| XY=          | -12.0725    | YY=      | 140.3914     | ZY= | -18.3503 |          |
| XZ=          | -43.5086    | YZ=      | -20.2111     | ZZ= | 46.0004  |          |
| Eigenvalues: | 3.9486      |          | 90.8841      |     | 144.1785 |          |
| 13 C         | Isotropic = | 27.7946  | Anisotropy = |     |          | 134.2879 |
| XX=          | 22.6659     | YX=      | 12.5870      | ZX= | 23.5690  |          |
| XY=          | 15.3933     | YY=      | 105.1947     | ZY= | -44.8856 |          |
| XZ=          | 15.0615     | YZ=      | -40.5141     | ZZ= | -44.4766 |          |

|              |             |          |              |          |          |
|--------------|-------------|----------|--------------|----------|----------|
| Eigenvalues: | -61.7017    | 27.7657  | 117.3199     |          |          |
| 14 C         | Isotropic = | 30.6458  | Anisotropy = | 188.8555 |          |
| XX=          | 117.1530    | YX=      | -62.3806     | ZX=      | -26.9580 |
| XY=          | -63.3777    | YY=      | -36.0698     | ZY=      | 72.0474  |
| XZ=          | -23.3750    | YZ=      | 66.3301      | ZZ=      | 10.8543  |
| Eigenvalues: | -92.7088    | 28.0968  | 156.5495     |          |          |
| 15 C         | Isotropic = | 73.9798  | Anisotropy = | 127.1560 |          |
| XX=          | 128.6352    | YX=      | -55.5968     | ZX=      | -9.0490  |
| XY=          | -46.6972    | YY=      | 11.3488      | ZY=      | 56.4850  |
| XZ=          | -5.1658     | YZ=      | 54.2396      | ZZ=      | 81.9554  |
| Eigenvalues: | -30.2820    | 93.4709  | 158.7505     |          |          |
| 16 C         | Isotropic = | 161.3470 | Anisotropy = | 41.6982  |          |
| XX=          | 140.1941    | YX=      | 2.4059       | ZX=      | 1.0294   |
| XY=          | 4.4394      | YY=      | 170.7421     | ZY=      | -15.7626 |
| XZ=          | 1.4457      | YZ=      | -18.5164     | ZZ=      | 173.1049 |
| Eigenvalues: | 139.4219    | 155.4734 | 189.1458     |          |          |
| 17 O         | Isotropic = | 202.2467 | Anisotropy = | 85.9624  |          |
| XX=          | 163.4849    | YX=      | -0.5405      | ZX=      | 21.0560  |
| XY=          | 5.9440      | YY=      | 243.3336     | ZY=      | -55.0922 |
| XZ=          | 32.5052     | YZ=      | -4.4579      | ZZ=      | 199.9215 |
| Eigenvalues: | 146.2816    | 200.9034 | 259.5549     |          |          |
| 18 O         | Isotropic = | 210.9161 | Anisotropy = | 51.4745  |          |
| XX=          | 169.7169    | YX=      | -4.3290      | ZX=      | -8.6052  |
| XY=          | -2.1282     | YY=      | 223.3469     | ZY=      | 2.8593   |
| XZ=          | -28.0441    | YZ=      | 5.3616       | ZZ=      | 239.6845 |
| Eigenvalues: | 165.1282    | 222.3877 | 245.2325     |          |          |
| 19 C         | Isotropic = | 164.4582 | Anisotropy = | 40.8819  |          |
| XX=          | 189.9241    | YX=      | -9.4767      | ZX=      | -4.5813  |
| XY=          | -0.9989     | YY=      | 144.8947     | ZY=      | 2.8003   |
| XZ=          | -7.1066     | YZ=      | 5.0583       | ZZ=      | 158.5559 |
| Eigenvalues: | 143.5539    | 158.1080 | 191.7128     |          |          |
| 20 O         | Isotropic = | 263.0820 | Anisotropy = | 135.3168 |          |
| XX=          | 328.8567    | YX=      | 10.6952      | ZX=      | 7.7624   |
| XY=          | 30.2267     | YY=      | 308.4275     | ZY=      | -96.9877 |
| XZ=          | 15.7417     | YZ=      | -70.0275     | ZZ=      | 151.9619 |
| Eigenvalues: | 114.0927    | 321.8602 | 353.2933     |          |          |
| 21 H         | Isotropic = | 29.9271  | Anisotropy = | 8.7488   |          |
| XX=          | 35.4038     | YX=      | 0.3931       | ZX=      | -1.9501  |
| XY=          | -0.6437     | YY=      | 29.5111      | ZY=      | -0.2416  |
| XZ=          | -1.9799     | YZ=      | -0.1109      | ZZ=      | 24.8665  |
| Eigenvalues: | 24.5044     | 29.5174  | 35.7596      |          |          |
| 22 H         | Isotropic = | 29.8953  | Anisotropy = | 7.8428   |          |
| XX=          | 28.8528     | YX=      | 0.4063       | ZX=      | 3.9963   |
| XY=          | -0.9912     | YY=      | 28.5094      | ZY=      | -1.1625  |
| XZ=          | 4.1215      | YZ=      | -0.5966      | ZZ=      | 32.3235  |
| Eigenvalues: | 26.1484     | 28.4136  | 35.1238      |          |          |
| 23 H         | Isotropic = | 30.7502  | Anisotropy = | 7.0747   |          |
| XX=          | 30.7062     | YX=      | -0.1198      | ZX=      | -2.3389  |
| XY=          | -0.6221     | YY=      | 29.8120      | ZY=      | 4.5571   |
| XZ=          | -2.0279     | YZ=      | 2.9446       | ZZ=      | 31.7325  |
| Eigenvalues: | 26.5994     | 30.1846  | 35.4667      |          |          |
| 24 H         | Isotropic = | 30.0302  | Anisotropy = | 8.4797   |          |

|              |             |         |              |     |         |         |
|--------------|-------------|---------|--------------|-----|---------|---------|
| XX=          | 31.1102     | YX=     | -1.5659      | ZX= | 1.5237  |         |
| XY=          | -2.4748     | YY=     | 33.6659      | ZY= | -2.8557 |         |
| XZ=          | 0.8948      | YZ=     | -2.8000      | ZZ= | 25.3144 |         |
| Eigenvalues: | 24.3958     |         | 30.0115      |     | 35.6833 |         |
| 25 H         | Isotropic = | 28.9595 | Anisotropy = |     |         | 3.5981  |
| XX=          | 26.2904     | YX=     | -0.9796      | ZX= | -2.7538 |         |
| XY=          | -2.1318     | YY=     | 30.3281      | ZY= | -0.3946 |         |
| XZ=          | -1.8579     | YZ=     | -0.6912      | ZZ= | 30.2599 |         |
| Eigenvalues: | 24.7501     |         | 30.7701      |     | 31.3582 |         |
| 26 H         | Isotropic = | 27.7968 | Anisotropy = |     |         | 9.2870  |
| XX=          | 28.8762     | YX=     | 0.8366       | ZX= | 3.3469  |         |
| XY=          | 1.6443      | YY=     | 24.2333      | ZY= | 3.0239  |         |
| XZ=          | 3.7837      | YZ=     | 2.0396       | ZZ= | 30.2809 |         |
| Eigenvalues: | 23.3126     |         | 26.0896      |     | 33.9881 |         |
| 27 H         | Isotropic = | 28.7148 | Anisotropy = |     |         | 9.7586  |
| XX=          | 26.1106     | YX=     | 3.2279       | ZX= | 1.8063  |         |
| XY=          | 1.1992      | YY=     | 30.9095      | ZY= | -6.1529 |         |
| XZ=          | 3.3998      | YZ=     | -4.1000      | ZZ= | 29.1243 |         |
| Eigenvalues: | 21.9840     |         | 28.9398      |     | 35.2205 |         |
| 28 H         | Isotropic = | 30.3652 | Anisotropy = |     |         | 10.2143 |
| XX=          | 31.5081     | YX=     | 0.8746       | ZX= | -5.3615 |         |
| XY=          | 2.5296      | YY=     | 27.8364      | ZY= | -1.3750 |         |
| XZ=          | -4.9651     | YZ=     | -0.5615      | ZZ= | 31.7510 |         |
| Eigenvalues: | 26.2338     |         | 27.6870      |     | 37.1747 |         |
| 29 H         | Isotropic = | 30.1547 | Anisotropy = |     |         | 9.5255  |
| XX=          | 32.7422     | YX=     | 3.5495       | ZX= | 3.0365  |         |
| XY=          | 5.0935      | YY=     | 29.7178      | ZY= | 1.1415  |         |
| XZ=          | 1.8101      | YZ=     | 0.4083       | ZZ= | 28.0040 |         |
| Eigenvalues: | 26.1677     |         | 27.7913      |     | 36.5050 |         |
| 30 H         | Isotropic = | 31.1738 | Anisotropy = |     |         | 10.5594 |
| XX=          | 29.4808     | YX=     | 0.7229       | ZX= | -0.2269 |         |
| XY=          | 0.5802      | YY=     | 36.9897      | ZY= | -3.7109 |         |
| XZ=          | -0.1517     | YZ=     | -3.5031      | ZZ= | 27.0509 |         |
| Eigenvalues: | 25.8797     |         | 29.4283      |     | 38.2134 |         |
| 31 H         | Isotropic = | 25.2188 | Anisotropy = |     |         | 7.4846  |
| XX=          | 30.0249     | YX=     | -0.5795      | ZX= | 1.1634  |         |
| XY=          | -0.6600     | YY=     | 21.8861      | ZY= | 1.1544  |         |
| XZ=          | 0.8540      | YZ=     | 0.8642       | ZZ= | 23.7454 |         |
| Eigenvalues: | 21.3327     |         | 24.1152      |     | 30.2085 |         |
| 32 H         | Isotropic = | 25.8029 | Anisotropy = |     |         | 6.7903  |
| XX=          | 28.6159     | YX=     | -1.5523      | ZX= | -2.2879 |         |
| XY=          | -1.4308     | YY=     | 22.2606      | ZY= | 0.6332  |         |
| XZ=          | -1.9784     | YZ=     | 1.2171       | ZZ= | 26.5322 |         |
| Eigenvalues: | 21.8789     |         | 25.2001      |     | 30.3298 |         |
| 33 H         | Isotropic = | 26.9255 | Anisotropy = |     |         | 4.7707  |
| XX=          | 25.9221     | YX=     | 0.4995       | ZX= | 1.4354  |         |
| XY=          | -0.3489     | YY=     | 27.4809      | ZY= | 1.1635  |         |
| XZ=          | 2.8668      | YZ=     | 2.8905       | ZZ= | 27.3736 |         |
| Eigenvalues: | 23.9521     |         | 26.7185      |     | 30.1060 |         |
| 34 H         | Isotropic = | 26.2310 | Anisotropy = |     |         | 6.2003  |
| XX=          | 25.6759     | YX=     | -0.9013      | ZX= | 4.6770  |         |
| XY=          | -0.6524     | YY=     | 27.4607      | ZY= | 5.2719  |         |

|              |             |         |         |              |         |         |
|--------------|-------------|---------|---------|--------------|---------|---------|
| XZ=          | 2.5213      | YZ=     | 0.6857  | ZZ=          | 25.5565 |         |
| Eigenvalues: | 20.8850     |         | 27.4435 |              | 30.3646 |         |
| 35 H         | Isotropic = | 30.2079 |         | Anisotropy = |         | 8.9325  |
| XX=          | 26.9289     | YX=     | 1.8953  | ZX=          | 0.9723  |         |
| XY=          | 2.5580      | YY=     | 35.3994 | ZY=          | -0.3966 |         |
| XZ=          | 0.2613      | YZ=     | -2.5641 | ZZ=          | 28.2954 |         |
| Eigenvalues: | 25.9600     |         | 28.5008 |              | 36.1629 |         |
| 36 H         | Isotropic = | 30.2085 |         | Anisotropy = |         | 6.7963  |
| XX=          | 27.7716     | YX=     | -0.2423 | ZX=          | -3.8198 |         |
| XY=          | -1.2890     | YY=     | 29.8238 | ZY=          | -1.4942 |         |
| XZ=          | -2.9819     | YZ=     | -0.2311 | ZZ=          | 33.0299 |         |
| Eigenvalues: | 25.8163     |         | 30.0698 |              | 34.7393 |         |
| 37 H         | Isotropic = | 30.0243 |         | Anisotropy = |         | 7.2943  |
| XX=          | 31.2583     | YX=     | -0.5302 | ZX=          | 2.1253  |         |
| XY=          | -1.7650     | YY=     | 30.3992 | ZY=          | -4.1824 |         |
| XZ=          | 2.9505      | YZ=     | -3.0159 | ZZ=          | 28.4155 |         |
| Eigenvalues: | 25.3342     |         | 29.8516 |              | 34.8872 |         |
| 38 H         | Isotropic = | 24.4538 |         | Anisotropy = |         | 23.5799 |
| XX=          | 35.3070     | YX=     | 4.5960  | ZX=          | -8.6773 |         |
| XY=          | 8.6305      | YY=     | 15.3261 | ZY=          | 2.2299  |         |
| XZ=          | -6.9453     | YZ=     | 1.3532  | ZZ=          | 22.7283 |         |
| Eigenvalues: | 11.6273     |         | 21.5604 |              | 40.1737 |         |
| 39 H         | Isotropic = | 28.0936 |         | Anisotropy = |         | 14.7122 |
| XX=          | 32.0002     | YX=     | 0.1104  | ZX=          | 4.9383  |         |
| XY=          | 0.9262      | YY=     | 20.7723 | ZY=          | 3.4384  |         |
| XZ=          | 6.6191      | YZ=     | 2.6338  | ZZ=          | 31.5084 |         |
| Eigenvalues: | 19.8742     |         | 26.5049 |              | 37.9018 |         |
| 40 H         | Isotropic = | 29.6588 |         | Anisotropy = |         | 8.1262  |
| XX=          | 30.9665     | YX=     | -2.6970 | ZX=          | -2.5139 |         |
| XY=          | -2.2272     | YY=     | 28.0770 | ZY=          | 4.3426  |         |
| XZ=          | -0.4696     | YZ=     | 3.9541  | ZZ=          | 29.9329 |         |
| Eigenvalues: | 24.5777     |         | 29.3223 |              | 35.0762 |         |
| 41 H         | Isotropic = | 29.3892 |         | Anisotropy = |         | 8.7618  |
| XX=          | 31.8115     | YX=     | 2.9412  | ZX=          | -2.0822 |         |
| XY=          | 4.1740      | YY=     | 29.1048 | ZY=          | -1.8705 |         |
| XZ=          | -2.3131     | YZ=     | -1.5344 | ZZ=          | 27.2513 |         |
| Eigenvalues: | 26.2349     |         | 26.7024 |              | 35.2304 |         |
| 42 H         | Isotropic = | 29.8578 |         | Anisotropy = |         | 8.1303  |
| XX=          | 33.0304     | YX=     | -2.2537 | ZX=          | 3.4447  |         |
| XY=          | -2.9438     | YY=     | 25.6057 | ZY=          | -0.9551 |         |
| XZ=          | 1.2900      | YZ=     | -0.5890 | ZZ=          | 30.9373 |         |
| Eigenvalues: | 24.7864     |         | 29.5091 |              | 35.2780 |         |

Number of frequencies: 120

harmonic frequencies in  $\text{cm}^{-1}$ , reduced masses in amu,

force constants in mDyne/A, and

normal modes in cartesian coordinates: 120

IR intensities in  $\text{km/mol}$

vibration # 1 2 3 4 5 6

-----  
frequencies 50.80 68.94 83.03 98.82 123.87 154.61

intensities 0.11 0.17 0.71 0.40 0.37 1.21

reduc. mass 1.45 1.53 0.86 1.06 1.00 1.12

force const 0.00 0.00 0.00 0.01 0.01 0.02

vibration # 7 8 9 10 11 12

-----  
frequencies 179.71 206.63 241.36 246.64 262.42 263.77

intensities 1.80 0.95 1.34 1.29 4.32 0.82

reduc. mass 0.84 0.90 0.61 0.62 0.53 0.47

force const 0.02 0.02 0.02 0.02 0.02 0.02

vibration # 13 14 15 16 17 18

-----  
frequencies 277.75 294.30 302.58 318.90 322.07 365.71

intensities 1.22 0.21 0.89 0.60 0.70 10.14

reduc. mass 0.89 0.67 0.27 1.70 0.27 4.03

force const 0.04 0.03 0.01 0.10 0.02 0.32

vibration # 19 20 21 22 23 24

-----



|             |        |        |        |        |        |        |
|-------------|--------|--------|--------|--------|--------|--------|
| frequencies | 372.48 | 406.64 | 438.63 | 447.47 | 485.61 | 515.90 |
| intensities | 0.08   | 1.25   | 2.65   | 11.40  | 3.70   | 15.27  |
| reduc. mass | 0.25   | 0.57   | 0.61   | 1.23   | 0.79   | 0.67   |
| force const | 0.02   | 0.06   | 0.07   | 0.15   | 0.11   | 0.10   |
| vibration # | 25     | 26     | 27     | 28     | 29     | 30     |

-----

|             |        |        |        |        |        |        |
|-------------|--------|--------|--------|--------|--------|--------|
| frequencies | 521.20 | 527.90 | 533.31 | 562.91 | 587.49 | 602.88 |
| intensities | 7.12   | 16.71  | 5.34   | 8.40   | 1.94   | 18.46  |
| reduc. mass | 2.72   | 0.68   | 0.79   | 0.60   | 1.12   | 0.49   |
| force const | 0.44   | 0.11   | 0.13   | 0.11   | 0.23   | 0.10   |

|             |    |    |    |    |    |    |
|-------------|----|----|----|----|----|----|
| vibration # | 31 | 32 | 33 | 34 | 35 | 36 |
|-------------|----|----|----|----|----|----|

-----

|             |        |        |        |        |        |        |
|-------------|--------|--------|--------|--------|--------|--------|
| frequencies | 636.14 | 674.83 | 712.43 | 719.77 | 730.68 | 742.47 |
| intensities | 9.67   | 19.87  | 6.84   | 29.59  | 33.34  | 1.90   |
| reduc. mass | 0.73   | 2.08   | 1.03   | 0.43   | 0.34   | 0.27   |
| force const | 0.17   | 0.56   | 0.31   | 0.13   | 0.11   | 0.09   |

|             |    |    |    |    |    |    |
|-------------|----|----|----|----|----|----|
| vibration # | 37 | 38 | 39 | 40 | 41 | 42 |
|-------------|----|----|----|----|----|----|

-----

|             |        |        |        |        |        |        |
|-------------|--------|--------|--------|--------|--------|--------|
| frequencies | 757.26 | 788.75 | 826.57 | 836.25 | 886.77 | 906.22 |
| intensities | 12.28  | 2.24   | 1.19   | 4.81   | 13.61  | 2.27   |
| reduc. mass | 1.36   | 1.08   | 2.35   | 0.59   | 0.71   | 0.72   |
| force const | 0.46   | 0.39   | 0.95   | 0.24   | 0.33   | 0.35   |

|             |    |    |    |    |    |    |
|-------------|----|----|----|----|----|----|
| vibration # | 43 | 44 | 45 | 46 | 47 | 48 |
|-------------|----|----|----|----|----|----|

-----

|             |        |        |        |        |         |         |
|-------------|--------|--------|--------|--------|---------|---------|
| frequencies | 928.49 | 943.18 | 956.68 | 991.70 | 1005.04 | 1016.91 |
| intensities | 0.05   | 0.76   | 19.71  | 1.33   | 4.12    | 34.32   |

|             |      |      |      |      |      |      |
|-------------|------|------|------|------|------|------|
| reduc. mass | 0.73 | 1.63 | 0.70 | 0.26 | 0.28 | 0.37 |
| force const | 0.37 | 0.86 | 0.38 | 0.15 | 0.17 | 0.22 |

vibration #      49    50    51    52    53    54

-----

|             |         |         |         |         |         |         |
|-------------|---------|---------|---------|---------|---------|---------|
| frequencies | 1028.79 | 1041.48 | 1046.07 | 1056.29 | 1080.31 | 1097.99 |
|-------------|---------|---------|---------|---------|---------|---------|

|             |       |      |      |      |       |       |
|-------------|-------|------|------|------|-------|-------|
| intensities | 35.43 | 7.23 | 4.50 | 4.76 | 18.93 | 29.09 |
|-------------|-------|------|------|------|-------|-------|

|             |      |      |      |      |      |      |
|-------------|------|------|------|------|------|------|
| reduc. mass | 0.45 | 0.57 | 0.27 | 0.41 | 0.47 | 0.56 |
|-------------|------|------|------|------|------|------|

|             |      |      |      |      |      |      |
|-------------|------|------|------|------|------|------|
| force const | 0.28 | 0.37 | 0.17 | 0.27 | 0.33 | 0.40 |
|-------------|------|------|------|------|------|------|

vibration #      55    56    57    58    59    60

-----

|             |         |         |         |         |         |         |
|-------------|---------|---------|---------|---------|---------|---------|
| frequencies | 1114.89 | 1121.44 | 1143.86 | 1155.08 | 1177.17 | 1211.30 |
|-------------|---------|---------|---------|---------|---------|---------|

|             |       |       |      |       |      |       |
|-------------|-------|-------|------|-------|------|-------|
| intensities | 19.12 | 18.04 | 4.87 | 41.52 | 6.22 | 20.03 |
|-------------|-------|-------|------|-------|------|-------|

|             |      |      |      |      |      |      |
|-------------|------|------|------|------|------|------|
| reduc. mass | 0.36 | 0.44 | 0.37 | 0.61 | 0.39 | 0.67 |
|-------------|------|------|------|------|------|------|

|             |      |      |      |      |      |      |
|-------------|------|------|------|------|------|------|
| force const | 0.26 | 0.33 | 0.29 | 0.48 | 0.32 | 0.58 |
|-------------|------|------|------|------|------|------|

vibration #      61    62    63    64    65    66

-----

|             |         |         |         |         |         |         |
|-------------|---------|---------|---------|---------|---------|---------|
| frequencies | 1250.37 | 1258.22 | 1263.68 | 1265.80 | 1277.94 | 1317.95 |
|-------------|---------|---------|---------|---------|---------|---------|

|             |       |       |       |      |       |      |
|-------------|-------|-------|-------|------|-------|------|
| intensities | 62.42 | 90.35 | 38.06 | 1.96 | 14.58 | 9.08 |
|-------------|-------|-------|-------|------|-------|------|

|             |      |      |      |      |      |      |
|-------------|------|------|------|------|------|------|
| reduc. mass | 0.94 | 0.51 | 0.83 | 0.34 | 0.65 | 0.63 |
|-------------|------|------|------|------|------|------|

|             |      |      |      |      |      |      |
|-------------|------|------|------|------|------|------|
| force const | 0.87 | 0.48 | 0.78 | 0.32 | 0.62 | 0.64 |
|-------------|------|------|------|------|------|------|

vibration #      67    68    69    70    71    72

-----

|             |         |         |         |         |         |         |
|-------------|---------|---------|---------|---------|---------|---------|
| frequencies | 1351.28 | 1375.77 | 1413.69 | 1430.63 | 1463.11 | 1499.40 |
|-------------|---------|---------|---------|---------|---------|---------|

|             |       |       |        |      |       |      |
|-------------|-------|-------|--------|------|-------|------|
| intensities | 32.43 | 31.46 | 431.12 | 8.62 | 26.67 | 2.19 |
|-------------|-------|-------|--------|------|-------|------|

|             |      |      |      |      |      |      |
|-------------|------|------|------|------|------|------|
| reduc. mass | 1.00 | 0.45 | 1.05 | 0.49 | 0.79 | 0.67 |
|-------------|------|------|------|------|------|------|

force const 1.08 0.50 1.23 0.59 1.00 0.88

vibration # 73 74 75 76 77 78

-----

frequencies 1503.26 1506.94 1522.96 1529.26 1547.40 1559.58

intensities 13.00 13.54 32.64 2.91 17.87 21.13

reduc. mass 0.52 1.78 1.15 2.48 0.64 0.81

force const 0.69 2.38 1.58 3.41 0.90 1.16

vibration # 79 80 81 82 83 84

-----

frequencies 1572.73 1596.73 1606.72 1638.55 1645.13 1648.07

intensities 61.97 11.95 4.15 4.27 55.94 55.17

reduc. mass 1.05 0.72 0.58 0.81 0.40 0.44

force const 1.53 1.09 0.88 1.29 0.63 0.71

vibration # 85 86 87 88 89 90

-----

frequencies 1657.14 1658.12 1660.04 1661.79 1667.80 1670.37

intensities 13.13 14.90 25.41 44.64 22.40 52.76

reduc. mass 0.16 0.20 0.27 0.33 0.42 0.66

force const 0.26 0.32 0.44 0.54 0.69 1.09

vibration # 91 92 93 94 95 96

-----

frequencies 1676.95 1681.93 1683.03 1684.61 1791.22 1822.10

intensities 21.42 9.05 22.12 6.00 761.86 131.10

reduc. mass 0.55 0.38 0.30 0.32 1.34 1.06

force const 0.91 0.63 0.49 0.53 2.54 2.07

| vibration # | 97      | 98      | 99      | 100     | 101     | 102     |
|-------------|---------|---------|---------|---------|---------|---------|
| -----       |         |         |         |         |         |         |
| frequencies | 1835.82 | 1896.20 | 3020.37 | 3025.21 | 3027.27 | 3055.79 |
| intensities | 82.39   | 15.94   | 225.24  | 528.35  | 880.66  | 414.72  |
| reduc. mass | 0.82    | 0.87    | 0.24    | 0.25    | 0.30    | 0.47    |
| force const | 1.64    | 1.85    | 1.28    | 1.35    | 1.61    | 2.59    |

| vibration # | 103     | 104     | 105     | 106     | 107     | 108     |
|-------------|---------|---------|---------|---------|---------|---------|
| -----       |         |         |         |         |         |         |
| frequencies | 3057.14 | 3086.29 | 3094.84 | 3107.44 | 3122.41 | 3124.06 |
| intensities | 642.72  | 333.03  | 372.38  | 76.20   | 32.05   | 447.15  |
| reduc. mass | 0.45    | 0.47    | 0.35    | 0.45    | 0.43    | 0.43    |
| force const | 2.50    | 2.65    | 1.97    | 2.55    | 2.47    | 2.46    |

| vibration # | 109     | 110     | 111     | 112     | 113     | 114     |
|-------------|---------|---------|---------|---------|---------|---------|
| -----       |         |         |         |         |         |         |
| frequencies | 3124.59 | 3127.58 | 3134.30 | 3135.94 | 3138.14 | 3143.44 |
| intensities | 535.42  | 235.13  | 236.03  | 494.09  | 349.49  | 364.78  |
| reduc. mass | 0.24    | 0.34    | 0.75    | 0.47    | 0.52    | 0.57    |
| force const | 1.36    | 1.95    | 4.36    | 2.72    | 3.00    | 3.30    |

| vibration # | 115     | 116     | 117     | 118     | 119     | 120     |
|-------------|---------|---------|---------|---------|---------|---------|
| -----       |         |         |         |         |         |         |
| frequencies | 3147.23 | 3149.92 | 3154.36 | 3206.36 | 3820.23 | 3856.98 |
| intensities | 307.86  | 454.56  | 440.07  | 309.81  | 524.00  | 23.16   |
| reduc. mass | 0.45    | 0.56    | 0.81    | 0.56    | 0.90    | 0.90    |
| force const | 2.64    | 3.26    | 4.77    | 3.39    | 7.74    | 7.92    |

Number of imaginary frequencies: 0

#### Conformation 4

Boltzmann Population = 3.6% (relative energy = 1.71 kcal/mol)

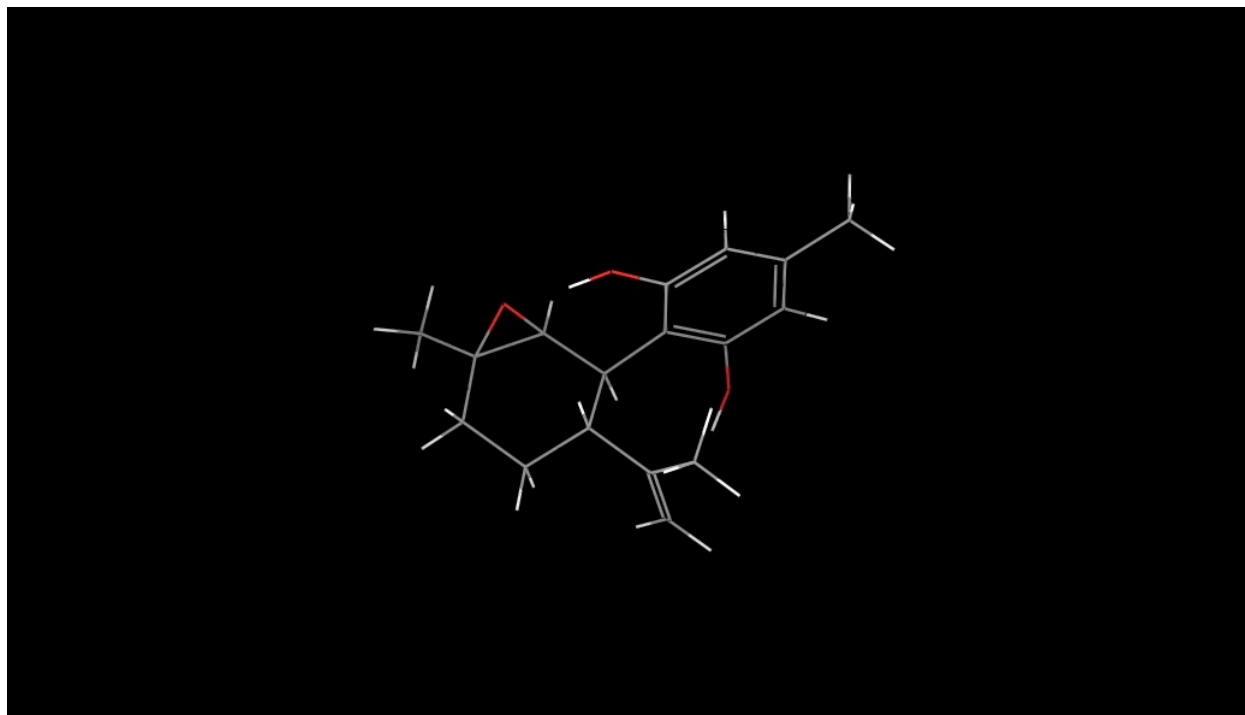

Geometries and Energy Method: M06-2X-D3/6-31G(d,p)

NMR Method: mPW1PW91/6-311+G(2d,p)

Thermodynamic properties for P = 1.00 atm, calculated at 1 temperatures

T = 298.15 K, P = 1.00 atm

Total internal energy, Utot (SCFE + ZPE + U): -885.955157 hartrees

Total enthalpy, Htot (Utot + pV): -885.954213 hartrees

Total Gibbs free energy, Gtot (Htot - T\*S): -886.016426 hartrees

#### Optimized Geometry:

| Center<br>Number | Atomic<br>Number | Atomic<br>Type | Coordinates (Angstroms) |           |          |
|------------------|------------------|----------------|-------------------------|-----------|----------|
|                  |                  |                | X                       | Y         | Z        |
| 1                | 6                | 0              | -1.366100               | -2.532000 | 0.122700 |
| 2                | 6                | 0              | -0.281800               | -3.474600 | 0.646200 |
| 3                | 6                | 0              | -0.374100               | -3.665400 | 2.162500 |
| 4                | 6                | 0              | -0.109500               | -2.319500 | 2.880700 |

|    |   |   |           |           |           |
|----|---|---|-----------|-----------|-----------|
| 5  | 6 | 0 | -0.902800 | -1.172800 | 2.286400  |
| 6  | 6 | 0 | -1.488000 | -1.249700 | 0.932500  |
| 7  | 6 | 0 | -1.734800 | 0.017800  | 0.155100  |
| 8  | 6 | 0 | -0.242700 | -2.453500 | 4.388000  |
| 9  | 6 | 0 | -1.473800 | -2.680200 | 5.031000  |
| 10 | 6 | 0 | -1.533900 | -2.865700 | 6.413300  |
| 11 | 6 | 0 | -0.382400 | -2.838600 | 7.192000  |
| 12 | 6 | 0 | 0.848700  | -2.652600 | 6.565800  |
| 13 | 6 | 0 | 0.912700  | -2.484600 | 5.188000  |
| 14 | 6 | 0 | 0.591700  | -4.716600 | 2.694800  |
| 15 | 6 | 0 | 1.879200  | -4.736400 | 2.332000  |
| 16 | 6 | 0 | 0.020400  | -5.720200 | 3.657600  |
| 17 | 8 | 0 | -2.655500 | -2.792100 | 4.375300  |
| 18 | 8 | 0 | 2.163300  | -2.350700 | 4.634000  |
| 19 | 6 | 0 | -0.463700 | -3.008100 | 8.687200  |
| 20 | 8 | 0 | -2.310000 | -1.364100 | 2.104400  |
| 21 | 1 | 0 | -1.161800 | -2.275700 | -0.921700 |
| 22 | 1 | 0 | -2.345000 | -3.025400 | 0.142000  |
| 23 | 1 | 0 | 0.702800  | -3.056700 | 0.401100  |
| 24 | 1 | 0 | -0.347100 | -4.443000 | 0.140800  |
| 25 | 1 | 0 | -1.393300 | -3.988000 | 2.414700  |
| 26 | 1 | 0 | 0.934200  | -2.051100 | 2.675000  |
| 27 | 1 | 0 | -0.647500 | -0.189500 | 2.682700  |
| 28 | 1 | 0 | -1.891200 | 0.857800  | 0.834500  |
| 29 | 1 | 0 | -0.882900 | 0.238100  | -0.494300 |
| 30 | 1 | 0 | -2.623800 | -0.093300 | -0.473000 |
| 31 | 1 | 0 | -2.510100 | -3.035100 | 6.856200  |
| 32 | 1 | 0 | 1.778200  | -2.667100 | 7.125000  |
| 33 | 1 | 0 | 2.560300  | -5.487700 | 2.719800  |
| 34 | 1 | 0 | 2.289800  | -4.030000 | 1.614400  |
| 35 | 1 | 0 | 0.783300  | -6.413800 | 4.017400  |
| 36 | 1 | 0 | -0.432600 | -5.213900 | 4.517100  |
| 37 | 1 | 0 | -0.774200 | -6.296900 | 3.170500  |
| 38 | 1 | 0 | -2.617500 | -2.422900 | 3.477800  |
| 39 | 1 | 0 | 2.240500  | -2.997700 | 3.916500  |
| 40 | 1 | 0 | -1.320400 | -3.625000 | 8.968300  |
| 41 | 1 | 0 | 0.442400  | -3.475200 | 9.080500  |
| 42 | 1 | 0 | -0.577000 | -2.037800 | 9.181300  |

-----

SCF GIAO Magnetic shielding tensor (ppm):

|              |          |             |          |              |          |
|--------------|----------|-------------|----------|--------------|----------|
| 1            | C        | Isotropic = | 154.8659 | Anisotropy = | 24.1925  |
| XX=          | 149.3084 | YX=         | -3.6678  | ZX=          | 2.8445   |
| XY=          | -3.1348  | YY=         | 164.8935 | ZY=          | -10.5815 |
| XZ=          | -4.3736  | YZ=         | -11.0619 | ZZ=          | 150.3959 |
| Eigenvalues: | 143.6587 | 149.9449    | 170.9943 |              |          |
| 2            | C        | Isotropic = | 155.6046 | Anisotropy = | 15.8312  |
| XX=          | 165.7607 | YX=         | 1.6299   | ZX=          | 1.9208   |
| XY=          | 0.2931   | YY=         | 157.8694 | ZY=          | 6.0336   |
| XZ=          | 2.5720   | YZ=         | -1.2108  | ZZ=          | 143.1837 |
| Eigenvalues: | 142.6126 | 158.0425    | 166.1587 |              |          |

|              |          |             |          |              |          |
|--------------|----------|-------------|----------|--------------|----------|
| 3            | C        | Isotropic = | 146.6448 | Anisotropy = | 24.9574  |
| XX=          | 156.9102 | YX=         | 12.0256  | ZX=          | 2.5345   |
| XY=          | 7.0164   | YY=         | 148.7115 | ZY=          | 4.3028   |
| XZ=          | 1.5984   | YZ=         | -4.2090  | ZZ=          | 134.3125 |
| Eigenvalues: | 134.0635 | 142.5877    | 163.2830 |              |          |
| 4            | C        | Isotropic = | 140.5221 | Anisotropy = | 31.1489  |
| XX=          | 123.6916 | YX=         | -0.6765  | ZX=          | 5.0155   |
| XY=          | -2.7412  | YY=         | 156.1344 | ZY=          | -5.7632  |
| XZ=          | 1.7331   | YZ=         | -13.6973 | ZZ=          | 141.7403 |
| Eigenvalues: | 123.0813 | 137.1970    | 161.2880 |              |          |
| 5            | C        | Isotropic = | 121.4171 | Anisotropy = | 53.8615  |
| XX=          | 95.2576  | YX=         | 11.5804  | ZX=          | -19.3808 |
| XY=          | 13.0643  | YY=         | 142.6593 | ZY=          | -8.7653  |
| XZ=          | -22.1859 | YZ=         | -17.2541 | ZZ=          | 126.3345 |
| Eigenvalues: | 84.3352  | 122.5914    | 157.3248 |              |          |
| 6            | C        | Isotropic = | 125.7156 | Anisotropy = | 56.2861  |
| XX=          | 83.9812  | YX=         | 4.8692   | ZX=          | -25.0428 |
| XY=          | 1.0232   | YY=         | 155.7348 | ZY=          | -10.6593 |
| XZ=          | -29.0974 | YZ=         | -9.4633  | ZZ=          | 137.4308 |
| Eigenvalues: | 72.6499  | 141.2572    | 163.2397 |              |          |
| 7            | C        | Isotropic = | 162.2211 | Anisotropy = | 43.1964  |
| XX=          | 168.6574 | YX=         | 7.7515   | ZX=          | -17.2738 |
| XY=          | 7.7830   | YY=         | 168.3135 | ZY=          | -21.0071 |
| XZ=          | -12.3788 | YZ=         | -18.8984 | ZZ=          | 149.6923 |
| Eigenvalues: | 134.6298 | 161.0148    | 191.0187 |              |          |
| 8            | C        | Isotropic = | 70.2612  | Anisotropy = | 125.9227 |
| XX=          | 19.3345  | YX=         | 15.3222  | ZX=          | 3.3957   |
| XY=          | 16.0391  | YY=         | 109.2074 | ZY=          | -55.3858 |
| XZ=          | -2.1837  | YZ=         | -56.2433 | ZZ=          | 82.2416  |
| Eigenvalues: | 14.0413  | 42.5326     | 154.2096 |              |          |
| 9            | C        | Isotropic = | 24.1354  | Anisotropy = | 139.5706 |
| XX=          | -16.2174 | YX=         | -14.7170 | ZX=          | -38.7239 |
| XY=          | -8.2818  | YY=         | 69.8015  | ZY=          | -66.7017 |
| XZ=          | -39.8135 | YZ=         | -66.9804 | ZZ=          | 18.8222  |
| Eigenvalues: | -61.3710 | 16.5948     | 117.1825 |              |          |
| 10           | C        | Isotropic = | 70.3669  | Anisotropy = | 120.7595 |
| XX=          | 66.3121  | YX=         | 17.1239  | ZX=          | 11.1766  |
| XY=          | 27.8741  | YY=         | 90.8732  | ZY=          | -74.1247 |
| XZ=          | 8.6841   | YZ=         | -75.0216 | ZZ=          | 53.9153  |
| Eigenvalues: | -10.6149 | 70.8423     | 150.8732 |              |          |
| 11           | C        | Isotropic = | 41.7648  | Anisotropy = | 196.7852 |
| XX=          | -53.0209 | YX=         | 25.6705  | ZX=          | 0.0948   |
| XY=          | 16.7351  | YY=         | 107.3222 | ZY=          | -81.2168 |
| XZ=          | 4.8360   | YZ=         | -80.3356 | ZZ=          | 70.9931  |
| Eigenvalues: | -57.6014 | 9.9409      | 172.9549 |              |          |
| 12           | C        | Isotropic = | 70.5916  | Anisotropy = | 121.8384 |
| XX=          | 38.6585  | YX=         | -16.1109 | ZX=          | -36.6279 |
| XY=          | -24.3427 | YY=         | 95.1097  | ZY=          | -70.3346 |
| XZ=          | -37.8926 | YZ=         | -57.3077 | ZZ=          | 78.0067  |
| Eigenvalues: | -11.9772 | 71.9349     | 151.8173 |              |          |
| 13           | C        | Isotropic = | 27.2563  | Anisotropy = | 132.9406 |
| XX=          | 25.9972  | YX=         | 25.2220  | ZX=          | 11.3439  |



|              |             |          |              |     |           |          |
|--------------|-------------|----------|--------------|-----|-----------|----------|
| XY=          | 28.3586     | YY=      | 32.3332      | ZY= | -84.9780  |          |
| XZ=          | 4.2761      | YZ=      | -86.2231     | ZZ= | 23.4386   |          |
| Eigenvalues: | -64.3442    |          | 30.2298      |     | 115.8834  |          |
| 14 C         | Isotropic = | 15.3731  | Anisotropy = |     |           | 213.5424 |
| XX=          | 5.2717      | YX=      | -80.2034     | ZX= | 106.9063  |          |
| XY=          | -86.6262    | YY=      | 16.8147      | ZY= | -14.9765  |          |
| XZ=          | 102.7873    | YZ=      | -23.5212     | ZZ= | 24.0329   |          |
| Eigenvalues: | -112.4719   |          | 0.8565       |     | 157.7348  |          |
| 15 C         | Isotropic = | 76.9695  | Anisotropy = |     |           | 126.2480 |
| XX=          | 54.1133     | YX=      | -68.0167     | ZX= | 64.3466   |          |
| XY=          | -70.2044    | YY=      | 76.6656      | ZY= | 9.9584    |          |
| XZ=          | 65.9688     | YZ=      | 15.8848      | ZZ= | 100.1296  |          |
| Eigenvalues: | -31.4860    |          | 101.2597     |     | 161.1348  |          |
| 16 C         | Isotropic = | 158.5232 | Anisotropy = |     |           | 42.3901  |
| XX=          | 163.8864    | YX=      | 11.4730      | ZX= | -21.1560  |          |
| XY=          | 6.1573      | YY=      | 149.6118     | ZY= | -4.9128   |          |
| XZ=          | -21.0564    | YZ=      | -5.4849      | ZZ= | 162.0714  |          |
| Eigenvalues: | 140.9849    |          | 147.8015     |     | 186.7833  |          |
| 17 O         | Isotropic = | 204.2604 | Anisotropy = |     |           | 79.0944  |
| XX=          | 167.2890    | YX=      | 11.3180      | ZX= | 14.5862   |          |
| XY=          | 34.0226     | YY=      | 217.0114     | ZY= | -50.9277  |          |
| XZ=          | 15.5936     | YZ=      | -16.3478     | ZZ= | 228.4808  |          |
| Eigenvalues: | 148.8115    |          | 206.9797     |     | 256.9900  |          |
| 18 O         | Isotropic = | 226.3608 | Anisotropy = |     |           | 76.1577  |
| XX=          | 178.1250    | YX=      | 1.1161       | ZX= | -25.2368  |          |
| XY=          | -12.2243    | YY=      | 244.0279     | ZY= | -43.0803  |          |
| XZ=          | -3.7286     | YZ=      | -7.2497      | ZZ= | 256.9296  |          |
| Eigenvalues: | 174.0087    |          | 227.9412     |     | 277.1326  |          |
| 19 C         | Isotropic = | 164.1945 | Anisotropy = |     |           | 40.6947  |
| XX=          | 189.4245    | YX=      | -3.7855      | ZX= | -6.1934   |          |
| XY=          | -10.7446    | YY=      | 149.9353     | ZY= | 8.3419    |          |
| XZ=          | -0.6852     | YZ=      | 7.0029       | ZZ= | 153.2237  |          |
| Eigenvalues: | 143.4480    |          | 157.8113     |     | 191.3243  |          |
| 20 O         | Isotropic = | 259.9118 | Anisotropy = |     |           | 135.4883 |
| XX=          | 331.2055    | YX=      | 9.6387       | ZX= | 1.6000    |          |
| XY=          | 33.4741     | YY=      | 249.3405     | ZY= | -124.0005 |          |
| XZ=          | 5.5163      | YZ=      | -98.5492     | ZZ= | 199.1894  |          |
| Eigenvalues: | 109.0074    |          | 320.4906     |     | 350.2374  |          |
| 21 H         | Isotropic = | 29.8980  | Anisotropy = |     |           | 8.6163   |
| XX=          | 35.4375     | YX=      | -0.3844      | ZX= | -1.3822   |          |
| XY=          | -1.3357     | YY=      | 29.3117      | ZY= | -1.1792   |          |
| XZ=          | -0.8254     | YZ=      | -0.9186      | ZZ= | 24.9447   |          |
| Eigenvalues: | 24.5573     |          | 29.4945      |     | 35.6422   |          |
| 22 H         | Isotropic = | 29.9184  | Anisotropy = |     |           | 7.8988   |
| XX=          | 28.4162     | YX=      | 1.2488       | ZX= | 3.3058    |          |
| XY=          | -0.1983     | YY=      | 28.1801      | ZY= | -0.1252   |          |
| XZ=          | 4.0254      | YZ=      | 0.6143       | ZZ= | 33.1588   |          |
| Eigenvalues: | 26.3558     |          | 28.2150      |     | 35.1843   |          |
| 23 H         | Isotropic = | 30.1675  | Anisotropy = |     |           | 7.3186   |
| XX=          | 30.3272     | YX=      | 0.0029       | ZX= | -1.8075   |          |
| XY=          | -0.3776     | YY=      | 31.8433      | ZY= | 5.0324    |          |
| XZ=          | -1.0181     | YZ=      | 3.8236       | ZZ= | 28.3320   |          |

|              |             |         |              |         |         |
|--------------|-------------|---------|--------------|---------|---------|
| Eigenvalues: | 25.1038     | 30.3521 | 35.0466      |         |         |
| 24 H         | Isotropic = | 30.2917 | Anisotropy = | 9.3730  |         |
| XX=          | 30.5150     | YX=     | -1.5826      | ZX=     | 2.1740  |
| XY=          | -2.2585     | YY=     | 32.5342      | ZY=     | -4.2696 |
| XZ=          | 3.3143      | YZ=     | -4.0479      | ZZ=     | 27.8259 |
| Eigenvalues: | 24.9744     | 29.3603 | 36.5404      |         |         |
| 25 H         | Isotropic = | 29.3150 | Anisotropy = | 3.6737  |         |
| XX=          | 29.0890     | YX=     | 1.1271       | ZX=     | -2.0990 |
| XY=          | -1.4763     | YY=     | 28.5806      | ZY=     | 0.1096  |
| XZ=          | -1.8886     | YZ=     | -0.1843      | ZZ=     | 30.2754 |
| Eigenvalues: | 27.5757     | 28.6051 | 31.7641      |         |         |
| 26 H         | Isotropic = | 28.2747 | Anisotropy = | 9.0231  |         |
| XX=          | 29.5127     | YX=     | 1.9485       | ZX=     | 3.1546  |
| XY=          | 3.5518      | YY=     | 26.9576      | ZY=     | 3.5601  |
| XZ=          | 2.4242      | YZ=     | 3.1816       | ZZ=     | 28.3536 |
| Eigenvalues: | 24.1694     | 26.3645 | 34.2901      |         |         |
| 27 H         | Isotropic = | 28.8175 | Anisotropy = | 10.0657 |         |
| XX=          | 26.0799     | YX=     | 3.5787       | ZX=     | 0.0592  |
| XY=          | 2.0061      | YY=     | 28.3655      | ZY=     | -5.7728 |
| XZ=          | 1.9075      | YZ=     | -4.1174      | ZZ=     | 32.0070 |
| Eigenvalues: | 22.5671     | 28.3573 | 35.5280      |         |         |
| 28 H         | Isotropic = | 31.1452 | Anisotropy = | 10.6167 |         |
| XX=          | 29.5719     | YX=     | 1.1573       | ZX=     | -0.8871 |
| XY=          | 1.1353      | YY=     | 34.4610      | ZY=     | -5.6102 |
| XZ=          | -0.7952     | YZ=     | -5.4001      | ZZ=     | 29.4027 |
| Eigenvalues: | 25.8712     | 29.3414 | 38.2230      |         |         |
| 29 H         | Isotropic = | 30.3200 | Anisotropy = | 10.1531 |         |
| XX=          | 31.8814     | YX=     | -0.9603      | ZX=     | -5.4203 |
| XY=          | 0.8957      | YY=     | 27.7108      | ZY=     | 0.2437  |
| XZ=          | -5.4499     | YZ=     | 1.0321       | ZZ=     | 31.3678 |
| Eigenvalues: | 26.0648     | 27.8065 | 37.0888      |         |         |
| 30 H         | Isotropic = | 30.1155 | Anisotropy = | 9.5472  |         |
| XX=          | 33.2925     | YX=     | 3.9171       | ZX=     | 2.2593  |
| XY=          | 5.1255      | YY=     | 29.2883      | ZY=     | 0.7287  |
| XZ=          | 0.6714      | YZ=     | 0.1217       | ZZ=     | 27.7657 |
| Eigenvalues: | 26.2006     | 27.6656 | 36.4803      |         |         |
| 31 H         | Isotropic = | 25.0369 | Anisotropy = | 7.4967  |         |
| XX=          | 29.7889     | YX=     | -0.2219      | ZX=     | 1.3331  |
| XY=          | -0.4869     | YY=     | 22.3415      | ZY=     | 0.9456  |
| XZ=          | 1.2893      | YZ=     | 1.5219       | ZZ=     | 22.9803 |
| Eigenvalues: | 21.2451     | 23.8309 | 30.0347      |         |         |
| 32 H         | Isotropic = | 25.1057 | Anisotropy = | 6.9819  |         |
| XX=          | 28.1384     | YX=     | -2.4979      | ZX=     | -1.3563 |
| XY=          | -2.0031     | YY=     | 23.4447      | ZY=     | 2.1570  |
| XZ=          | -1.3665     | YZ=     | 1.9628       | ZZ=     | 23.7342 |
| Eigenvalues: | 21.4253     | 24.1316 | 29.7603      |         |         |
| 33 H         | Isotropic = | 26.7496 | Anisotropy = | 5.8853  |         |
| XX=          | 24.4336     | YX=     | -1.5764      | ZX=     | -0.3547 |
| XY=          | -0.1945     | YY=     | 29.7750      | ZY=     | 1.1141  |
| XZ=          | 1.5367      | YZ=     | 2.8143       | ZZ=     | 26.0403 |
| Eigenvalues: | 23.8102     | 25.7656 | 30.6731      |         |         |
| 34 H         | Isotropic = | 26.6143 | Anisotropy = | 8.2430  |         |

|              |             |         |              |     |         |         |  |
|--------------|-------------|---------|--------------|-----|---------|---------|--|
| XX=          | 24.7620     | YX=     | 0.6457       | ZX= | 2.0730  |         |  |
| XY=          | -2.3703     | YY=     | 30.1489      | ZY= | 5.7145  |         |  |
| XZ=          | 0.6046      | YZ=     | 1.7813       | ZZ= | 24.9321 |         |  |
| Eigenvalues: | 22.0472     |         | 25.6861      |     | 32.1097 |         |  |
| 35 H         | Isotropic = | 30.4284 | Anisotropy = |     |         | 8.5571  |  |
| XX=          | 29.9899     | YX=     | 4.6639       | ZX= | -1.3459 |         |  |
| XY=          | 2.5508      | YY=     | 32.9053      | ZY= | -0.6892 |         |  |
| XZ=          | -2.2525     | YZ=     | -2.8571      | ZZ= | 28.3899 |         |  |
| Eigenvalues: | 27.0992     |         | 28.0528      |     | 36.1331 |         |  |
| 36 H         | Isotropic = | 30.7198 | Anisotropy = |     |         | 8.7609  |  |
| XX=          | 29.9618     | YX=     | -2.9160      | ZX= | -2.5680 |         |  |
| XY=          | -3.9166     | YY=     | 33.4465      | ZY= | -4.4812 |         |  |
| XZ=          | -0.2910     | YZ=     | -3.3516      | ZZ= | 28.7512 |         |  |
| Eigenvalues: | 24.7319     |         | 30.8672      |     | 36.5604 |         |  |
| 37 H         | Isotropic = | 30.2802 | Anisotropy = |     |         | 8.5427  |  |
| XX=          | 27.5577     | YX=     | 0.5490       | ZX= | 0.2439  |         |  |
| XY=          | 0.2869      | YY=     | 28.0991      | ZY= | -3.1045 |         |  |
| XZ=          | 1.1785      | YZ=     | -1.7600      | ZZ= | 35.1839 |         |  |
| Eigenvalues: | 26.8177     |         | 28.0476      |     | 35.9753 |         |  |
| 38 H         | Isotropic = | 24.2995 | Anisotropy = |     |         | 25.6806 |  |
| XX=          | 38.2309     | YX=     | 0.4261       | ZX= | -8.7329 |         |  |
| XY=          | 3.5841      | YY=     | 15.8524      | ZY= | 5.2146  |         |  |
| XZ=          | -8.2412     | YZ=     | 4.1533       | ZZ= | 18.8151 |         |  |
| Eigenvalues: | 10.6484     |         | 20.8301      |     | 41.4199 |         |  |
| 39 H         | Isotropic = | 27.7464 | Anisotropy = |     |         | 18.1932 |  |
| XX=          | 26.4464     | YX=     | -5.9582      | ZX= | 7.0669  |         |  |
| XY=          | -9.2563     | YY=     | 32.5233      | ZY= | -0.6540 |         |  |
| XZ=          | 7.2412      | YZ=     | -3.2214      | ZZ= | 24.2696 |         |  |
| Eigenvalues: | 17.1243     |         | 26.2398      |     | 39.8752 |         |  |
| 40 H         | Isotropic = | 29.6983 | Anisotropy = |     |         | 7.7846  |  |
| XX=          | 31.4949     | YX=     | -1.6603      | ZX= | -3.3278 |         |  |
| XY=          | -0.0974     | YY=     | 25.6138      | ZY= | 2.4204  |         |  |
| XZ=          | -1.6571     | YZ=     | 2.5136       | ZZ= | 31.9861 |         |  |
| Eigenvalues: | 24.7702     |         | 29.4366      |     | 34.8880 |         |  |
| 41 H         | Isotropic = | 29.6734 | Anisotropy = |     |         | 7.9348  |  |
| XX=          | 33.5389     | YX=     | 3.1176       | ZX= | 1.3354  |         |  |
| XY=          | 1.9231      | YY=     | 29.0743      | ZY= | 2.6784  |         |  |
| XZ=          | -0.4152     | YZ=     | 2.6274       | ZZ= | 26.4070 |         |  |
| Eigenvalues: | 24.6622     |         | 29.3948      |     | 34.9633 |         |  |
| 42 H         | Isotropic = | 29.3167 | Anisotropy = |     |         | 9.2168  |  |
| XX=          | 30.3388     | YX=     | -3.5344      | ZX= | 1.6655  |         |  |
| XY=          | -4.6083     | YY=     | 30.4109      | ZY= | -1.8272 |         |  |
| XZ=          | 2.5230      | YZ=     | -2.1745      | ZZ= | 27.2005 |         |  |
| Eigenvalues: | 26.1496     |         | 26.3393      |     | 35.4613 |         |  |

Number of frequencies: 120

harmonic frequencies in  $\text{cm}^{-1}$ , reduced masses in amu,

force constants in mDyne/A, and

normal modes in cartesian coordinates: 120

IR intensities in  $\text{km/mol}$

vibration #      1    2    3    4    5    6

-----

frequencies      59.71 65.48 82.17 106.33 119.69 148.21

intensities      0.16 0.41 1.30 1.20 1.44 0.96

reduc. mass      0.98 1.31 1.46 2.10 1.05 0.95

force const      0.00 0.00 0.01 0.01 0.01 0.01

vibration #      7    8    9    10   11   12

-----

frequencies      181.41 194.01 229.80 237.83 242.70 255.15

intensities      1.64 0.97 0.29 3.43 1.01 9.60

reduc. mass      0.52 0.93 0.52 0.55 0.56 0.68

force const      0.01 0.02 0.02 0.02 0.02 0.03

vibration #      13   14   15   16   17   18

-----

frequencies      278.77 298.10 300.03 318.29 327.27 368.30

intensities      0.26 1.03 2.31 5.86 0.27 0.74

reduc. mass      0.95 0.49 0.52 1.43 0.27 0.25

force const      0.04 0.03 0.03 0.09 0.02 0.02

vibration #      19   20   21   22   23   24

-----

|             |        |        |        |        |        |        |
|-------------|--------|--------|--------|--------|--------|--------|
| frequencies | 373.33 | 396.91 | 441.79 | 458.43 | 486.58 | 506.25 |
| intensities | 1.22   | 2.03   | 6.37   | 4.24   | 9.28   | 2.89   |
| reduc. mass | 4.07   | 0.37   | 0.94   | 0.98   | 0.36   | 0.75   |
| force const | 0.33   | 0.03   | 0.11   | 0.12   | 0.05   | 0.11   |

vibration #      25    26    27    28    29    30

-----

|             |        |        |        |        |        |        |
|-------------|--------|--------|--------|--------|--------|--------|
| frequencies | 521.72 | 524.47 | 526.94 | 535.69 | 551.18 | 584.96 |
| intensities | 4.77   | 21.40  | 15.20  | 5.67   | 2.55   | 8.73   |
| reduc. mass | 0.58   | 0.46   | 0.84   | 1.05   | 0.65   | 1.56   |
| force const | 0.09   | 0.07   | 0.14   | 0.18   | 0.12   | 0.31   |

vibration #      31    32    33    34    35    36

-----

|             |        |        |        |        |        |        |
|-------------|--------|--------|--------|--------|--------|--------|
| frequencies | 625.53 | 694.37 | 712.58 | 714.48 | 728.05 | 745.38 |
| intensities | 7.24   | 1.75   | 10.51  | 3.87   | 17.26  | 15.00  |
| reduc. mass | 0.82   | 1.30   | 0.24   | 0.55   | 0.33   | 0.44   |
| force const | 0.19   | 0.37   | 0.07   | 0.17   | 0.10   | 0.14   |

vibration #      37    38    39    40    41    42

-----

|             |        |        |        |        |        |        |
|-------------|--------|--------|--------|--------|--------|--------|
| frequencies | 759.13 | 791.11 | 805.28 | 833.57 | 878.66 | 904.97 |
| intensities | 5.37   | 4.68   | 12.83  | 5.33   | 7.54   | 3.05   |
| reduc. mass | 1.79   | 0.69   | 2.00   | 0.72   | 0.76   | 0.58   |
| force const | 0.61   | 0.25   | 0.76   | 0.30   | 0.35   | 0.28   |

vibration #      43    44    45    46    47    48

-----

|             |        |        |        |        |         |         |
|-------------|--------|--------|--------|--------|---------|---------|
| frequencies | 935.76 | 943.69 | 948.38 | 994.44 | 1002.99 | 1012.16 |
|-------------|--------|--------|--------|--------|---------|---------|

|             |      |      |       |      |      |       |
|-------------|------|------|-------|------|------|-------|
| intensities | 0.07 | 3.17 | 14.36 | 9.63 | 8.22 | 23.95 |
| reduc. mass | 0.72 | 1.39 | 0.69  | 0.32 | 0.31 | 0.29  |
| force const | 0.37 | 0.73 | 0.36  | 0.19 | 0.18 | 0.17  |

vibration #      49    50    51    52    53    54

-----

|             |         |         |         |         |         |         |
|-------------|---------|---------|---------|---------|---------|---------|
| frequencies | 1030.52 | 1034.57 | 1044.47 | 1052.62 | 1057.18 | 1096.89 |
| intensities | 16.58   | 15.84   | 10.01   | 0.51    | 9.38    | 44.25   |
| reduc. mass | 0.51    | 0.58    | 0.40    | 0.29    | 0.55    | 0.68    |
| force const | 0.32    | 0.37    | 0.26    | 0.19    | 0.36    | 0.48    |

vibration #      55    56    57    58    59    60

-----

|             |         |         |         |         |         |         |
|-------------|---------|---------|---------|---------|---------|---------|
| frequencies | 1112.96 | 1122.18 | 1139.74 | 1147.06 | 1186.83 | 1209.34 |
| intensities | 5.13    | 7.95    | 26.25   | 5.15    | 6.35    | 17.73   |
| reduc. mass | 0.48    | 0.59    | 0.29    | 0.36    | 0.34    | 0.35    |
| force const | 0.35    | 0.44    | 0.22    | 0.28    | 0.29    | 0.30    |

vibration #      61    62    63    64    65    66

-----

|             |         |         |         |         |         |         |
|-------------|---------|---------|---------|---------|---------|---------|
| frequencies | 1251.35 | 1253.77 | 1260.61 | 1269.56 | 1285.49 | 1305.21 |
| intensities | 56.78   | 103.33  | 23.05   | 12.14   | 65.60   | 18.57   |
| reduc. mass | 0.83    | 0.47    | 0.77    | 0.24    | 0.63    | 0.57    |
| force const | 0.77    | 0.43    | 0.72    | 0.23    | 0.61    | 0.57    |

vibration #      67    68    69    70    71    72

-----

|             |         |         |         |         |         |         |
|-------------|---------|---------|---------|---------|---------|---------|
| frequencies | 1348.24 | 1379.12 | 1391.19 | 1432.08 | 1450.56 | 1467.97 |
| intensities | 32.77   | 59.88   | 326.83  | 25.72   | 14.21   | 2.21    |

|             |      |      |      |      |      |      |
|-------------|------|------|------|------|------|------|
| reduc. mass | 0.94 | 0.41 | 1.31 | 0.58 | 0.79 | 0.74 |
| force const | 1.01 | 0.46 | 1.50 | 0.70 | 0.98 | 0.94 |

vibration #      73    74    75    76    77    78

-----

|             |         |         |         |         |         |         |
|-------------|---------|---------|---------|---------|---------|---------|
| frequencies | 1505.08 | 1512.23 | 1515.64 | 1524.47 | 1530.24 | 1560.42 |
|-------------|---------|---------|---------|---------|---------|---------|

|             |      |       |       |       |       |       |
|-------------|------|-------|-------|-------|-------|-------|
| intensities | 2.06 | 59.32 | 21.12 | 22.52 | 14.32 | 14.72 |
|-------------|------|-------|-------|-------|-------|-------|

|             |      |      |      |      |      |      |
|-------------|------|------|------|------|------|------|
| reduc. mass | 0.96 | 0.70 | 0.80 | 2.69 | 0.90 | 0.89 |
|-------------|------|------|------|------|------|------|

|             |      |      |      |      |      |      |
|-------------|------|------|------|------|------|------|
| force const | 1.28 | 0.94 | 1.08 | 3.68 | 1.24 | 1.27 |
|-------------|------|------|------|------|------|------|

vibration #      79    80    81    82    83    84

-----

|             |         |         |         |         |         |         |
|-------------|---------|---------|---------|---------|---------|---------|
| frequencies | 1572.25 | 1591.74 | 1611.12 | 1637.51 | 1642.91 | 1645.21 |
|-------------|---------|---------|---------|---------|---------|---------|

|             |       |       |      |       |       |       |
|-------------|-------|-------|------|-------|-------|-------|
| intensities | 54.47 | 14.58 | 7.31 | 14.01 | 46.23 | 40.23 |
|-------------|-------|-------|------|-------|-------|-------|

|             |      |      |      |      |      |      |
|-------------|------|------|------|------|------|------|
| reduc. mass | 1.26 | 0.75 | 0.94 | 0.61 | 0.27 | 0.34 |
|-------------|------|------|------|------|------|------|

|             |      |      |      |      |      |      |
|-------------|------|------|------|------|------|------|
| force const | 1.83 | 1.12 | 1.43 | 0.97 | 0.42 | 0.54 |
|-------------|------|------|------|------|------|------|

vibration #      85    86    87    88    89    90

-----

|             |         |         |         |         |         |         |
|-------------|---------|---------|---------|---------|---------|---------|
| frequencies | 1658.76 | 1660.26 | 1661.54 | 1664.80 | 1666.74 | 1669.94 |
|-------------|---------|---------|---------|---------|---------|---------|

|             |       |       |       |       |       |       |
|-------------|-------|-------|-------|-------|-------|-------|
| intensities | 41.78 | 54.66 | 54.05 | 12.61 | 23.87 | 68.87 |
|-------------|-------|-------|-------|-------|-------|-------|

|             |      |      |      |      |      |      |
|-------------|------|------|------|------|------|------|
| reduc. mass | 0.14 | 0.25 | 0.28 | 0.17 | 0.25 | 0.32 |
|-------------|------|------|------|------|------|------|

|             |      |      |      |      |      |      |
|-------------|------|------|------|------|------|------|
| force const | 0.22 | 0.41 | 0.45 | 0.28 | 0.41 | 0.52 |
|-------------|------|------|------|------|------|------|

vibration #      91    92    93    94    95    96

-----

|             |         |         |         |         |         |         |
|-------------|---------|---------|---------|---------|---------|---------|
| frequencies | 1674.13 | 1682.28 | 1682.71 | 1684.36 | 1792.32 | 1823.19 |
|-------------|---------|---------|---------|---------|---------|---------|

|             |        |       |       |      |        |        |
|-------------|--------|-------|-------|------|--------|--------|
| intensities | 301.52 | 16.47 | 14.65 | 0.83 | 694.77 | 123.04 |
|-------------|--------|-------|-------|------|--------|--------|

|             |      |      |      |      |      |      |
|-------------|------|------|------|------|------|------|
| reduc. mass | 1.07 | 0.37 | 0.37 | 0.31 | 1.34 | 0.98 |
|-------------|------|------|------|------|------|------|

force const 1.76 0.62 0.62 0.52 2.54 1.93

vibration # 97 98 99 100 101 102

-----

frequencies 1831.17 1887.44 3022.30 3025.95 3028.54 3058.64

intensities 106.50 18.87 299.31 505.88 753.30 271.68

reduc. mass 0.80 0.85 0.33 0.32 0.33 0.25

force const 1.57 1.79 1.76 1.75 1.78 1.40

vibration # 103 104 105 106 107 108

-----

frequencies 3060.33 3079.86 3089.92 3093.58 3123.60 3126.25

intensities 651.90 140.50 131.68 344.95 532.36 445.10

reduc. mass 0.25 0.66 0.55 0.39 0.75 0.27

force const 1.36 3.67 3.11 2.22 4.29 1.56

vibration # 109 110 111 112 113 114

-----

frequencies 3126.98 3129.45 3136.04 3139.23 3145.91 3146.57

intensities 196.59 101.19 455.12 372.86 99.74 265.41

reduc. mass 0.19 0.23 0.44 0.51 0.40 0.33

force const 1.09 1.33 2.55 2.94 2.33 1.90

vibration # 115 116 117 118 119 120

-----

frequencies 3150.40 3152.52 3155.08 3196.48 3822.12 3841.65

intensities 364.43 522.67 333.50 312.34 67.63 631.15

reduc. mass 0.55 0.70 0.78 0.56 0.79 0.79

force const 3.19 4.11 4.57 3.35 6.83 6.88



Number of imaginary frequencies: 0

3. DFT calculation data for CBE (**7**). Energies, optimized geometries, NMR shielding values and IR frequencies from calculations performed at the mPW1PW91/6-311+G(2d,p)//M06-2X-D3/6-31G(d,p) level.

Conformation 1

Boltzmann Population = 10.0% (relative energy = 0.84 kcal/mol)

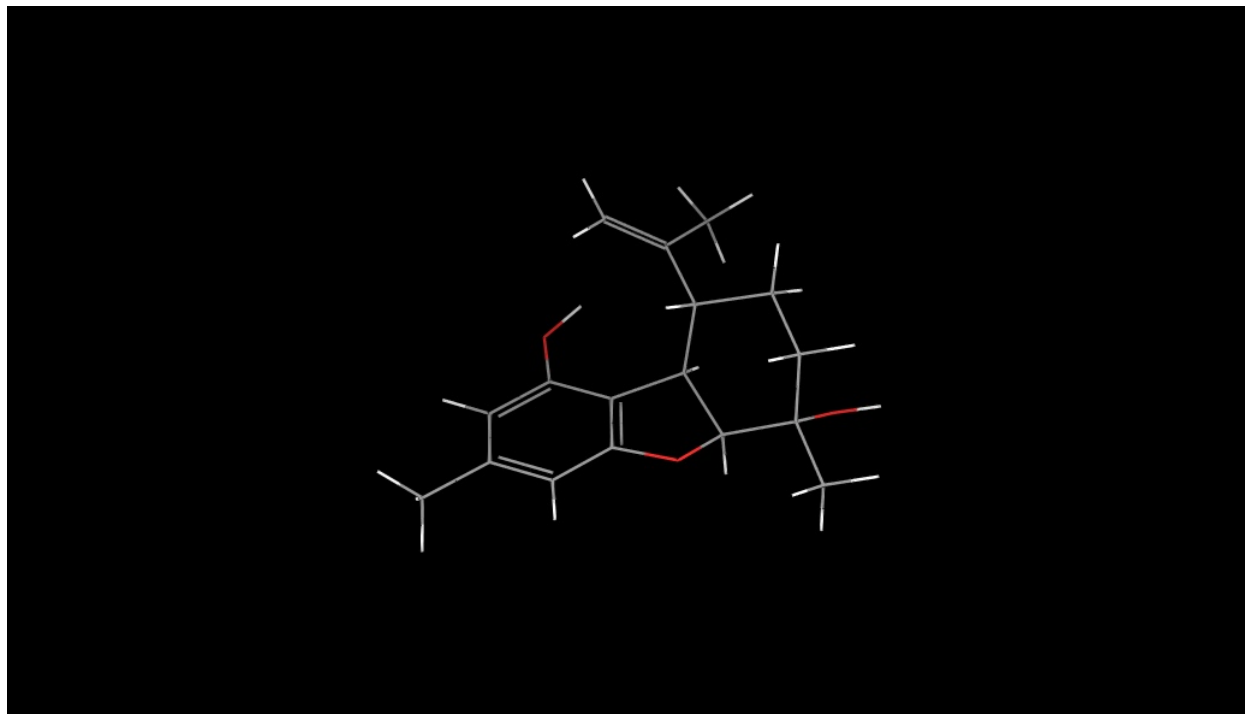

Geometries and Energy Method: M06-2X-D3/6-31G(d,p)

NMR Method: mPW1PW91/6-311+G(2d,p)

Thermodynamic properties for P = 1.00 atm, calculated at 1 temperatures

T = 298.15 K, P = 1.00 atm

Total internal energy, Utot(SCFE + ZPE + U): -885.982145 hartrees

Total enthalpy, Htot (Utot + pV): -885.981201 hartrees

Total Gibbs free energy, Gtot (Htot - T\*S): -886.044495 hartrees

Optimized Geometry:

| Center<br>Number | Atomic<br>Number | Atomic<br>Type | Coordinates (Angstroms) |   |   |
|------------------|------------------|----------------|-------------------------|---|---|
|                  |                  |                | X                       | Y | Z |
| -----            |                  |                |                         |   |   |

---

|    |   |   |           |           |           |
|----|---|---|-----------|-----------|-----------|
| 1  | 6 | 0 | -6.053400 | -0.679900 | -2.574100 |
| 2  | 6 | 0 | -4.599000 | -0.352800 | -2.899800 |
| 3  | 6 | 0 | -3.871300 | -1.608000 | -3.395500 |
| 4  | 6 | 0 | -3.939800 | -2.766100 | -2.359700 |
| 5  | 6 | 0 | -5.345000 | -2.952500 | -1.747000 |
| 6  | 6 | 0 | -6.136600 | -1.688200 | -1.425100 |
| 7  | 6 | 0 | -7.580100 | -2.034000 | -1.079300 |
| 8  | 6 | 0 | -2.432200 | -1.337600 | -3.783100 |
| 9  | 6 | 0 | -3.821200 | -4.109600 | -3.053300 |
| 10 | 6 | 0 | -5.118800 | -4.584200 | -3.256500 |
| 11 | 6 | 0 | -2.758200 | -4.850100 | -3.554400 |
| 12 | 6 | 0 | -3.023500 | -6.050200 | -4.228100 |
| 13 | 6 | 0 | -4.326700 | -6.497900 | -4.423000 |
| 14 | 6 | 0 | -5.409000 | -5.751900 | -3.932900 |
| 15 | 8 | 0 | -1.456600 | -4.486300 | -3.405000 |
| 16 | 8 | 0 | -6.060100 | -3.761200 | -2.696200 |
| 17 | 8 | 0 | -5.460100 | -1.177500 | -0.277000 |
| 18 | 6 | 0 | -4.589000 | -7.797800 | -5.141600 |
| 19 | 6 | 0 | -1.596500 | -0.526900 | -2.824300 |
| 20 | 6 | 0 | -1.924800 | -1.816900 | -4.922700 |
| 21 | 1 | 0 | -6.557700 | -1.101300 | -3.452200 |
| 22 | 1 | 0 | -6.604700 | 0.226000  | -2.290000 |
| 23 | 1 | 0 | -4.539500 | 0.425800  | -3.668100 |
| 24 | 1 | 0 | -4.115000 | 0.034600  | -1.996700 |
| 25 | 1 | 0 | -4.399800 | -1.960800 | -4.290800 |
| 26 | 1 | 0 | -3.209700 | -2.606800 | -1.559300 |
| 27 | 1 | 0 | -5.248800 | -3.530200 | -0.816500 |
| 28 | 1 | 0 | -8.087000 | -2.487400 | -1.933100 |
| 29 | 1 | 0 | -8.122900 | -1.126200 | -0.792500 |
| 30 | 1 | 0 | -7.607100 | -2.734600 | -0.240400 |
| 31 | 1 | 0 | -2.179100 | -6.617400 | -4.605600 |
| 32 | 1 | 0 | -6.433900 | -6.082600 | -4.060100 |
| 33 | 1 | 0 | -1.418800 | -3.524600 | -3.310300 |
| 34 | 1 | 0 | -5.930700 | -0.386400 | 0.012200  |
| 35 | 1 | 0 | -3.691700 | -8.161000 | -5.646300 |
| 36 | 1 | 0 | -4.916300 | -8.570700 | -4.438900 |
| 37 | 1 | 0 | -5.379100 | -7.680200 | -5.888600 |
| 38 | 1 | 0 | -1.929300 | 0.516200  | -2.807700 |
| 39 | 1 | 0 | -1.682700 | -0.899300 | -1.797200 |
| 40 | 1 | 0 | -0.542600 | -0.541300 | -3.110200 |
| 41 | 1 | 0 | -0.887100 | -1.650700 | -5.198600 |
| 42 | 1 | 0 | -2.533900 | -2.396100 | -5.610800 |

---

SCF GIAO Magnetic shielding tensor (ppm):

|              |          |             |          |              |          |
|--------------|----------|-------------|----------|--------------|----------|
| 1            | C        | Isotropic = | 149.2811 | Anisotropy = | 21.7909  |
| XX=          | 143.9598 | YX=         | -0.3783  | ZX=          | 4.1016   |
| XY=          | -5.3716  | YY=         | 154.9419 | ZY=          | 10.2980  |
| XZ=          | -3.7946  | YZ=         | 12.1621  | ZZ=          | 148.9415 |
| Eigenvalues: | 139.4956 | 144.5393    | 163.8083 |              |          |

|              |          |             |          |              |          |
|--------------|----------|-------------|----------|--------------|----------|
| 2            | C        | Isotropic = | 161.3098 | Anisotropy = | 15.7808  |
| XX=          | 164.7477 | YX=         | -6.5929  | ZX=          | 6.6928   |
| XY=          | -4.2933  | YY=         | 163.2330 | ZY=          | 0.2042   |
| XZ=          | 8.5127   | YZ=         | -0.1942  | ZZ=          | 155.9488 |
| Eigenvalues: | 150.8972 | 161.2020    | 171.8304 |              |          |
| 3            | C        | Isotropic = | 133.7456 | Anisotropy = | 14.3557  |
| XX=          | 136.0301 | YX=         | -1.3723  | ZX=          | 2.1666   |
| XY=          | 6.7028   | YY=         | 138.9162 | ZY=          | -6.4471  |
| XZ=          | 0.5947   | YZ=         | -9.7176  | ZZ=          | 126.2905 |
| Eigenvalues: | 121.9315 | 135.9892    | 143.3161 |              |          |
| 4            | C        | Isotropic = | 142.0035 | Anisotropy = | 19.3071  |
| XX=          | 148.1547 | YX=         | -1.0212  | ZX=          | 1.9211   |
| XY=          | 0.2839   | YY=         | 148.5372 | ZY=          | 0.8722   |
| XZ=          | 6.7819   | YZ=         | 23.5762  | ZZ=          | 129.3186 |
| Eigenvalues: | 122.7240 | 148.4116    | 154.8749 |              |          |
| 5            | C        | Isotropic = | 97.3419  | Anisotropy = | 58.0116  |
| XX=          | 118.7459 | YX=         | 10.1787  | ZX=          | -22.9858 |
| XY=          | 1.9189   | YY=         | 92.8559  | ZY=          | -20.4346 |
| XZ=          | -29.4971 | YZ=         | -11.9841 | ZZ=          | 80.4238  |
| Eigenvalues: | 62.2439  | 93.7655     | 136.0162 |              |          |
| 6            | C        | Isotropic = | 115.6644 | Anisotropy = | 54.6768  |
| XX=          | 116.3306 | YX=         | 14.4211  | ZX=          | -29.8686 |
| XY=          | 10.5508  | YY=         | 110.3326 | ZY=          | -8.6302  |
| XZ=          | -26.1464 | YZ=         | -10.2556 | ZZ=          | 120.3300 |
| Eigenvalues: | 89.8041  | 105.0735    | 152.1156 |              |          |
| 7            | C        | Isotropic = | 157.3878 | Anisotropy = | 45.4168  |
| XX=          | 143.8699 | YX=         | -7.9502  | ZX=          | 0.6007   |
| XY=          | -3.5024  | YY=         | 186.7974 | ZY=          | -1.9287  |
| XZ=          | -1.1793  | YZ=         | -2.8468  | ZZ=          | 141.4962 |
| Eigenvalues: | 141.1938 | 143.3039    | 187.6657 |              |          |
| 8            | C        | Isotropic = | 28.0506  | Anisotropy = | 193.1309 |
| XX=          | 59.1680  | YX=         | -9.4959  | ZX=          | 78.6473  |
| XY=          | -16.3816 | YY=         | -51.1938 | ZY=          | 66.1586  |
| XZ=          | 81.1313  | YZ=         | 67.2240  | ZZ=          | 76.1775  |
| Eigenvalues: | -94.1739 | 21.5211     | 156.8045 |              |          |
| 9            | C        | Isotropic = | 66.5154  | Anisotropy = | 111.7026 |
| XX=          | 20.3183  | YX=         | 1.8441   | ZX=          | 9.2526   |
| XY=          | -13.1667 | YY=         | 58.6196  | ZY=          | 37.1464  |
| XZ=          | 21.6033  | YZ=         | 42.0410  | ZZ=          | 120.6081 |
| Eigenvalues: | 13.7943  | 44.7680     | 140.9838 |              |          |
| 10           | C        | Isotropic = | 20.7574  | Anisotropy = | 110.5817 |
| XX=          | -26.4435 | YX=         | 36.8251  | ZX=          | -0.3993  |
| XY=          | 46.4991  | YY=         | 2.2071   | ZY=          | 31.2053  |
| XZ=          | -9.7582  | YZ=         | 21.4626  | ZZ=          | 86.5085  |
| Eigenvalues: | -58.8410 | 26.6346     | 94.4785  |              |          |
| 11           | C        | Isotropic = | 27.6875  | Anisotropy = | 134.1740 |
| XX=          | 15.8754  | YX=         | -11.5488 | ZX=          | 11.0705  |
| XY=          | -6.3950  | YY=         | -27.6147 | ZY=          | 58.3961  |
| XZ=          | 5.7080   | YZ=         | 54.7187  | ZZ=          | 94.8019  |
| Eigenvalues: | -51.6757 | 17.6014     | 117.1369 |              |          |
| 12           | C        | Isotropic = | 72.2942  | Anisotropy = | 115.4800 |
| XX=          | 24.0630  | YX=         | 33.9802  | ZX=          | -4.4866  |

|              |             |          |              |     |          |          |
|--------------|-------------|----------|--------------|-----|----------|----------|
| XY=          | 45.6171     | YY=      | 53.7598      | ZY= | 34.7547  |          |
| XZ=          | -2.4895     | YZ=      | 25.3930      | ZZ= | 139.0598 |          |
| Eigenvalues: | -6.4364     |          | 74.0381      |     | 149.2809 |          |
| 13 C         | Isotropic = | 41.6085  | Anisotropy = |     |          | 193.5731 |
| XX=          | -43.7328    | YX=      | -13.2555     | ZX= | 22.1433  |          |
| XY=          | -16.4870    | YY=      | 26.7042      | ZY= | 61.5957  |          |
| XZ=          | 28.9166     | YZ=      | 63.3064      | ZZ= | 141.8540 |          |
| Eigenvalues: | -55.4753    |          | 9.6435       |     | 170.6572 |          |
| 14 C         | Isotropic = | 80.9834  | Anisotropy = |     |          | 123.0542 |
| XX=          | 74.0598     | YX=      | 5.2082       | ZX= | 6.4217   |          |
| XY=          | -10.5370    | YY=      | 26.2964      | ZY= | 56.2853  |          |
| XZ=          | 7.2384      | YZ=      | 48.4189      | ZZ= | 142.5940 |          |
| Eigenvalues: | 5.8438      |          | 74.0868      |     | 163.0196 |          |
| 15 O         | Isotropic = | 205.2124 | Anisotropy = |     |          | 79.7675  |
| XX=          | 153.0105    | YX=      | 2.1501       | ZX= | -0.2541  |          |
| XY=          | 13.8863     | YY=      | 206.2646     | ZY= | 20.8606  |          |
| XZ=          | 29.1334     | YZ=      | -19.8473     | ZZ= | 256.3622 |          |
| Eigenvalues: | 149.9297    |          | 207.3168     |     | 258.3908 |          |
| 16 O         | Isotropic = | 188.5363 | Anisotropy = |     |          | 118.6810 |
| XX=          | 216.4028    | YX=      | -68.6739     | ZX= | 32.8843  |          |
| XY=          | -50.9564    | YY=      | 164.6923     | ZY= | 28.5952  |          |
| XZ=          | 33.3436     | YZ=      | -41.8042     | ZZ= | 184.5139 |          |
| Eigenvalues: | 122.4510    |          | 175.5010     |     | 267.6570 |          |
| 17 O         | Isotropic = | 248.6810 | Anisotropy = |     |          | 92.0953  |
| XX=          | 309.2980    | YX=      | -0.4799      | ZX= | -17.1269 |          |
| XY=          | -9.0954     | YY=      | 206.9666     | ZY= | -7.7844  |          |
| XZ=          | 2.8530      | YZ=      | -13.3429     | ZZ= | 229.7785 |          |
| Eigenvalues: | 202.3567    |          | 233.6085     |     | 310.0779 |          |
| 18 C         | Isotropic = | 163.9808 | Anisotropy = |     |          | 41.2779  |
| XX=          | 187.4517    | YX=      | 5.5354       | ZX= | -9.1037  |          |
| XY=          | 11.5733     | YY=      | 157.3601     | ZY= | -8.2053  |          |
| XZ=          | -5.5556     | YZ=      | -5.5105      | ZZ= | 147.1308 |          |
| Eigenvalues: | 143.4913    |          | 156.9518     |     | 191.4994 |          |
| 19 C         | Isotropic = | 167.4021 | Anisotropy = |     |          | 27.0895  |
| XX=          | 166.9322    | YX=      | 5.6487       | ZX= | -9.8875  |          |
| XY=          | 8.8619      | YY=      | 169.7591     | ZY= | -11.5520 |          |
| XZ=          | -8.7747     | YZ=      | -9.1490      | ZZ= | 165.5151 |          |
| Eigenvalues: | 155.7462    |          | 160.9984     |     | 185.4618 |          |
| 20 C         | Isotropic = | 66.0737  | Anisotropy = |     |          | 115.4512 |
| XX=          | 104.5626    | YX=      | -22.1906     | ZX= | 34.2543  |          |
| XY=          | -17.9800    | YY=      | -5.1210      | ZY= | 56.9337  |          |
| XZ=          | 39.9118     | YZ=      | 50.2928      | ZZ= | 98.7795  |          |
| Eigenvalues: | -35.8122    |          | 90.9921      |     | 143.0412 |          |
| 21 H         | Isotropic = | 29.9188  | Anisotropy = |     |          | 6.1674   |
| XX=          | 27.5783     | YX=      | -0.1998      | ZX= | -1.1239  |          |
| XY=          | 0.4814      | YY=      | 29.0049      | ZY= | -1.7327  |          |
| XZ=          | 0.0877      | YZ=      | -2.2926      | ZZ= | 33.1731  |          |
| Eigenvalues: | 27.5282     |          | 28.1977      |     | 34.0303  |          |
| 22 H         | Isotropic = | 30.4633  | Anisotropy = |     |          | 8.6660   |
| XX=          | 33.0730     | YX=      | -2.7579      | ZX= | 3.9309   |          |
| XY=          | -2.3283     | YY=      | 30.3679      | ZY= | -0.2154  |          |
| XZ=          | 4.0944      | YZ=      | -0.3535      | ZZ= | 27.9488  |          |

|              |             |         |              |         |         |
|--------------|-------------|---------|--------------|---------|---------|
| Eigenvalues: | 25.5283     | 29.6209 | 36.2406      |         |         |
| 23 H         | Isotropic = | 30.6196 | Anisotropy = | 10.0731 |         |
| XX=          | 29.6435     | YX=     | 1.1120       | ZX=     | 4.6961  |
| XY=          | 1.1506      | YY=     | 31.1333      | ZY=     | 3.5545  |
| XZ=          | 5.5002      | YZ=     | 3.2751       | ZZ=     | 31.0821 |
| Eigenvalues: | 24.8485     | 29.6753 | 37.3350      |         |         |
| 24 H         | Isotropic = | 29.6117 | Anisotropy = | 5.7936  |         |
| XX=          | 30.5161     | YX=     | 1.3113       | ZX=     | -2.5207 |
| XY=          | 0.9617      | YY=     | 32.1824      | ZY=     | -1.4351 |
| XZ=          | -2.0316     | YZ=     | -1.1868      | ZZ=     | 26.1366 |
| Eigenvalues: | 25.0817     | 30.2794 | 33.4741      |         |         |
| 25 H         | Isotropic = | 29.6369 | Anisotropy = | 2.4490  |         |
| XX=          | 30.0070     | YX=     | -1.7039      | ZX=     | -1.4895 |
| XY=          | 0.4263      | YY=     | 28.7719      | ZY=     | 0.3160  |
| XZ=          | 0.3354      | YZ=     | 1.8573       | ZZ=     | 30.1317 |
| Eigenvalues: | 28.1222     | 29.5189 | 31.2695      |         |         |
| 26 H         | Isotropic = | 28.5430 | Anisotropy = | 4.4112  |         |
| XX=          | 26.9045     | YX=     | 0.8349       | ZX=     | 0.5511  |
| XY=          | -1.1101     | YY=     | 29.3878      | ZY=     | -2.0045 |
| XZ=          | -0.9105     | YZ=     | -2.2378      | ZZ=     | 29.3367 |
| Eigenvalues: | 26.7920     | 27.3532 | 31.4838      |         |         |
| 27 H         | Isotropic = | 27.6482 | Anisotropy = | 4.9637  |         |
| XX=          | 26.5728     | YX=     | 0.7615       | ZX=     | -1.0084 |
| XY=          | -1.0024     | YY=     | 27.5064      | ZY=     | 1.0083  |
| XZ=          | -2.7447     | YZ=     | 3.1043       | ZZ=     | 28.8655 |
| Eigenvalues: | 25.0552     | 26.9322 | 30.9574      |         |         |
| 28 H         | Isotropic = | 29.9439 | Anisotropy = | 8.4041  |         |
| XX=          | 29.2772     | YX=     | 0.4241       | ZX=     | -2.2855 |
| XY=          | 0.9510      | YY=     | 32.7298      | ZY=     | -4.4003 |
| XZ=          | -2.2195     | YZ=     | -3.8122      | ZZ=     | 27.8246 |
| Eigenvalues: | 24.8593     | 29.4257 | 35.5466      |         |         |
| 29 H         | Isotropic = | 30.9814 | Anisotropy = | 8.9109  |         |
| XX=          | 33.0347     | YX=     | -3.3665      | ZX=     | 1.4557  |
| XY=          | -4.6395     | YY=     | 32.3086      | ZY=     | -0.7197 |
| XZ=          | 1.3747      | YZ=     | -0.5257      | ZZ=     | 27.6010 |
| Eigenvalues: | 27.2056     | 28.8166 | 36.9221      |         |         |
| 30 H         | Isotropic = | 30.3502 | Anisotropy = | 9.1006  |         |
| XX=          | 27.8259     | YX=     | -0.4282      | ZX=     | 0.4428  |
| XY=          | -0.3511     | YY=     | 33.7738      | ZY=     | 4.9159  |
| XZ=          | 0.2533      | YZ=     | 3.6609       | ZZ=     | 29.4508 |
| Eigenvalues: | 26.6044     | 28.0289 | 36.4173      |         |         |
| 31 H         | Isotropic = | 25.2632 | Anisotropy = | 6.6998  |         |
| XX=          | 27.3224     | YX=     | 2.3032       | ZX=     | -1.1549 |
| XY=          | 2.3414      | YY=     | 26.0769      | ZY=     | -2.0295 |
| XZ=          | -0.9081     | YZ=     | -2.2234      | ZZ=     | 22.3903 |
| Eigenvalues: | 21.4193     | 24.6405 | 29.7297      |         |         |
| 32 H         | Isotropic = | 25.3252 | Anisotropy = | 7.5743  |         |
| XX=          | 30.2810     | YX=     | 0.0291       | ZX=     | -0.7840 |
| XY=          | 0.5874      | YY=     | 24.0356      | ZY=     | -1.1448 |
| XZ=          | -0.7269     | YZ=     | -1.3646      | ZZ=     | 21.6591 |
| Eigenvalues: | 21.0833     | 24.5177 | 30.3747      |         |         |
| 33 H         | Isotropic = | 26.8858 | Anisotropy = | 18.3624 |         |

|              |             |         |              |     |         |         |
|--------------|-------------|---------|--------------|-----|---------|---------|
| XX=          | 34.2052     | YX=     | 4.1163       | ZX= | 6.8970  |         |
| XY=          | 6.0389      | YY=     | 27.8244      | ZY= | -0.3986 |         |
| XZ=          | 7.0650      | YZ=     | 2.0314       | ZZ= | 18.6279 |         |
| Eigenvalues: | 15.8545     |         | 25.6756      |     | 39.1274 |         |
| 34 H         | Isotropic = | 32.2395 | Anisotropy = |     |         | 17.7175 |
| XX=          | 43.4046     | YX=     | -2.3976      | ZX= | -2.1496 |         |
| XY=          | -1.8492     | YY=     | 25.8154      | ZY= | -1.1198 |         |
| XZ=          | -3.2745     | YZ=     | -1.4174      | ZZ= | 27.4987 |         |
| Eigenvalues: | 24.5906     |         | 28.0768      |     | 44.0512 |         |
| 35 H         | Isotropic = | 29.8357 | Anisotropy = |     |         | 7.8951  |
| XX=          | 34.0593     | YX=     | -3.3886      | ZX= | -0.6849 |         |
| XY=          | -1.0369     | YY=     | 30.2084      | ZY= | -1.3186 |         |
| XZ=          | -1.5827     | YZ=     | -1.0032      | ZZ= | 25.2395 |         |
| Eigenvalues: | 24.6933     |         | 29.7148      |     | 35.0991 |         |
| 36 H         | Isotropic = | 29.3302 | Anisotropy = |     |         | 8.9229  |
| XX=          | 30.8226     | YX=     | 3.4914       | ZX= | 1.4618  |         |
| XY=          | 3.1660      | YY=     | 30.4357      | ZY= | 2.2579  |         |
| XZ=          | 2.6327      | YZ=     | 3.1506       | ZZ= | 26.7322 |         |
| Eigenvalues: | 25.2857     |         | 27.4261      |     | 35.2787 |         |
| 37 H         | Isotropic = | 29.4835 | Anisotropy = |     |         | 8.0776  |
| XX=          | 30.1113     | YX=     | 1.7202       | ZX= | -2.6160 |         |
| XY=          | 0.1152      | YY=     | 27.4621      | ZY= | -3.6429 |         |
| XZ=          | -2.2428     | YZ=     | -4.3389      | ZZ= | 30.8770 |         |
| Eigenvalues: | 24.7580     |         | 28.8239      |     | 34.8686 |         |
| 38 H         | Isotropic = | 29.8711 | Anisotropy = |     |         | 7.9917  |
| XX=          | 33.5668     | YX=     | 2.1302       | ZX= | 1.6065  |         |
| XY=          | 2.9219      | YY=     | 30.6582      | ZY= | -1.0272 |         |
| XZ=          | 2.1807      | YZ=     | -0.4494      | ZZ= | 25.3884 |         |
| Eigenvalues: | 24.6757     |         | 29.7387      |     | 35.1989 |         |
| 39 H         | Isotropic = | 29.7700 | Anisotropy = |     |         | 4.6092  |
| XX=          | 26.5927     | YX=     | 0.2806       | ZX= | -1.8574 |         |
| XY=          | 1.0159      | YY=     | 30.6384      | ZY= | -1.0685 |         |
| XZ=          | -2.1378     | YZ=     | 0.4472       | ZZ= | 32.0789 |         |
| Eigenvalues: | 25.8851     |         | 30.5822      |     | 32.8428 |         |
| 40 H         | Isotropic = | 29.9822 | Anisotropy = |     |         | 8.3460  |
| XX=          | 28.3742     | YX=     | -0.3518      | ZX= | -0.9311 |         |
| XY=          | -1.6237     | YY=     | 34.8670      | ZY= | -1.7602 |         |
| XZ=          | -0.2560     | YZ=     | -2.7735      | ZZ= | 26.7053 |         |
| Eigenvalues: | 25.8434     |         | 28.5569      |     | 35.5462 |         |
| 41 H         | Isotropic = | 26.6356 | Anisotropy = |     |         | 5.7311  |
| XX=          | 27.8748     | YX=     | -3.2381      | ZX= | -1.0002 |         |
| XY=          | -0.4153     | YY=     | 26.5856      | ZY= | 1.5912  |         |
| XZ=          | -1.1416     | YZ=     | 3.7551       | ZZ= | 25.4464 |         |
| Eigenvalues: | 23.2566     |         | 26.1939      |     | 30.4563 |         |
| 42 H         | Isotropic = | 26.6539 | Anisotropy = |     |         | 7.0812  |
| XX=          | 27.1849     | YX=     | -0.4118      | ZX= | -1.2617 |         |
| XY=          | -2.6039     | YY=     | 25.7061      | ZY= | 4.3004  |         |
| XZ=          | -0.5067     | YZ=     | 4.2514       | ZZ= | 27.0707 |         |
| Eigenvalues: | 21.9911     |         | 26.5959      |     | 31.3747 |         |

Number of frequencies: 120

harmonic frequencies in  $\text{cm}^{-1}$ , reduced masses in amu,

force constants in mDyne/A, and

normal modes in cartesian coordinates: 120

IR intensities in  $\text{km/mol}$

|             |        |        |        |        |        |        |
|-------------|--------|--------|--------|--------|--------|--------|
| vibration # | 1      | 2      | 3      | 4      | 5      | 6      |
| -----       |        |        |        |        |        |        |
| frequencies | 45.82  | 60.20  | 76.10  | 87.71  | 102.05 | 160.11 |
| intensities | 0.94   | 0.14   | 1.03   | 0.36   | 1.82   | 1.07   |
| reduc. mass | 0.79   | 0.99   | 0.47   | 1.05   | 1.14   | 0.75   |
| force const | 0.00   | 0.00   | 0.00   | 0.00   | 0.01   | 0.01   |
|             |        |        |        |        |        |        |
| vibration # | 7      | 8      | 9      | 10     | 11     | 12     |
| -----       |        |        |        |        |        |        |
| frequencies | 176.06 | 193.18 | 212.89 | 235.94 | 253.13 | 262.19 |
| intensities | 0.43   | 0.27   | 0.66   | 0.43   | 6.93   | 3.94   |
| reduc. mass | 1.29   | 0.74   | 1.32   | 0.64   | 0.99   | 1.25   |
| force const | 0.02   | 0.02   | 0.04   | 0.02   | 0.04   | 0.05   |
|             |        |        |        |        |        |        |
| vibration # | 13     | 14     | 15     | 16     | 17     | 18     |
| -----       |        |        |        |        |        |        |
| frequencies | 271.91 | 281.51 | 302.64 | 307.48 | 315.96 | 341.53 |
| intensities | 4.88   | 4.52   | 1.10   | 1.52   | 0.54   | 6.45   |
| reduc. mass | 0.65   | 0.36   | 0.35   | 0.94   | 0.34   | 1.43   |
| force const | 0.03   | 0.02   | 0.02   | 0.05   | 0.02   | 0.10   |
|             |        |        |        |        |        |        |
| vibration # | 19     | 20     | 21     | 22     | 23     | 24     |
| -----       |        |        |        |        |        |        |



|             |        |        |        |        |        |        |
|-------------|--------|--------|--------|--------|--------|--------|
| frequencies | 356.35 | 381.06 | 422.80 | 434.18 | 460.48 | 492.52 |
| intensities | 3.06   | 9.85   | 7.78   | 32.79  | 2.29   | 19.16  |
| reduc. mass | 0.77   | 0.45   | 0.76   | 0.71   | 0.53   | 0.91   |
| force const | 0.06   | 0.04   | 0.08   | 0.08   | 0.07   | 0.13   |

vibration #      25    26    27    28    29    30

-----

|             |        |        |        |        |        |        |
|-------------|--------|--------|--------|--------|--------|--------|
| frequencies | 512.44 | 527.08 | 532.23 | 548.18 | 565.05 | 602.16 |
| intensities | 0.68   | 0.43   | 12.07  | 1.72   | 30.10  | 24.03  |
| reduc. mass | 0.57   | 0.74   | 1.77   | 0.64   | 0.56   | 2.49   |
| force const | 0.09   | 0.12   | 0.29   | 0.11   | 0.10   | 0.53   |

vibration #      31    32    33    34    35    36

-----

|             |        |        |        |        |        |        |
|-------------|--------|--------|--------|--------|--------|--------|
| frequencies | 634.81 | 666.27 | 675.29 | 694.36 | 718.82 | 736.11 |
| intensities | 102.04 | 9.53   | 11.10  | 8.21   | 2.47   | 10.56  |
| reduc. mass | 0.54   | 0.88   | 1.02   | 1.15   | 0.43   | 0.77   |
| force const | 0.13   | 0.23   | 0.27   | 0.33   | 0.13   | 0.25   |

vibration #      37    38    39    40    41    42

-----

|             |        |        |        |        |        |        |
|-------------|--------|--------|--------|--------|--------|--------|
| frequencies | 748.02 | 795.51 | 809.16 | 834.85 | 875.46 | 922.13 |
| intensities | 6.88   | 5.22   | 7.81   | 2.48   | 24.64  | 4.67   |
| reduc. mass | 1.88   | 0.60   | 0.74   | 2.49   | 0.63   | 0.66   |
| force const | 0.62   | 0.22   | 0.28   | 1.02   | 0.28   | 0.33   |

vibration #      43    44    45    46    47    48

-----

|             |        |        |        |        |         |         |
|-------------|--------|--------|--------|--------|---------|---------|
| frequencies | 923.23 | 961.60 | 962.94 | 992.39 | 1006.18 | 1021.35 |
|-------------|--------|--------|--------|--------|---------|---------|

|             |       |      |      |      |      |      |
|-------------|-------|------|------|------|------|------|
| intensities | 12.53 | 6.46 | 8.09 | 3.26 | 1.64 | 7.51 |
| reduc. mass | 0.56  | 0.35 | 1.45 | 0.39 | 0.34 | 0.27 |
| force const | 0.28  | 0.19 | 0.79 | 0.22 | 0.20 | 0.17 |

vibration #      49    50    51    52    53    54

-----

|             |         |         |         |         |         |         |
|-------------|---------|---------|---------|---------|---------|---------|
| frequencies | 1026.69 | 1044.67 | 1053.62 | 1058.13 | 1063.87 | 1091.57 |
| intensities | 32.44   | 26.69   | 20.64   | 14.05   | 10.97   | 12.50   |
| reduc. mass | 0.29    | 0.36    | 0.41    | 0.23    | 0.24    | 0.44    |
| force const | 0.18    | 0.23    | 0.27    | 0.15    | 0.16    | 0.31    |

vibration #      55    56    57    58    59    60

-----

|             |         |         |         |         |         |         |
|-------------|---------|---------|---------|---------|---------|---------|
| frequencies | 1100.17 | 1129.84 | 1141.62 | 1161.47 | 1190.34 | 1210.32 |
| intensities | 5.89    | 17.01   | 67.61   | 39.83   | 43.67   | 52.00   |
| reduc. mass | 0.51    | 0.59    | 0.60    | 0.59    | 1.37    | 0.86    |
| force const | 0.37    | 0.44    | 0.46    | 0.47    | 1.14    | 0.74    |

vibration #      61    62    63    64    65    66

-----

|             |         |         |         |         |         |         |
|-------------|---------|---------|---------|---------|---------|---------|
| frequencies | 1222.96 | 1240.37 | 1250.70 | 1269.63 | 1318.51 | 1329.29 |
| intensities | 31.65   | 102.39  | 43.29   | 63.92   | 93.72   | 31.79   |
| reduc. mass | 0.74    | 0.56    | 0.26    | 0.89    | 0.63    | 0.37    |
| force const | 0.65    | 0.51    | 0.24    | 0.85    | 0.65    | 0.39    |

vibration #      67    68    69    70    71    72

-----

|             |         |         |         |         |         |         |
|-------------|---------|---------|---------|---------|---------|---------|
| frequencies | 1361.66 | 1398.44 | 1403.22 | 1410.96 | 1424.63 | 1472.90 |
| intensities | 26.47   | 169.34  | 131.93  | 14.94   | 288.28  | 1.49    |

|             |      |      |      |      |      |      |
|-------------|------|------|------|------|------|------|
| reduc. mass | 0.57 | 0.54 | 0.60 | 0.80 | 0.89 | 0.43 |
| force const | 0.62 | 0.63 | 0.69 | 0.94 | 1.06 | 0.54 |

|             |    |    |    |    |    |    |
|-------------|----|----|----|----|----|----|
| vibration # | 73 | 74 | 75 | 76 | 77 | 78 |
|-------------|----|----|----|----|----|----|

-----

|             |         |         |         |         |         |         |
|-------------|---------|---------|---------|---------|---------|---------|
| frequencies | 1487.58 | 1490.63 | 1511.52 | 1520.94 | 1531.29 | 1542.55 |
| intensities | 4.42    | 9.36    | 183.79  | 33.44   | 36.03   | 4.04    |
| reduc. mass | 0.44    | 0.86    | 1.66    | 2.39    | 0.53    | 0.50    |
| force const | 0.57    | 1.13    | 2.24    | 3.25    | 0.73    | 0.71    |

|             |    |    |    |    |    |    |
|-------------|----|----|----|----|----|----|
| vibration # | 79 | 80 | 81 | 82 | 83 | 84 |
|-------------|----|----|----|----|----|----|

-----

|             |         |         |         |         |         |         |
|-------------|---------|---------|---------|---------|---------|---------|
| frequencies | 1555.98 | 1567.85 | 1590.00 | 1607.21 | 1635.31 | 1646.00 |
| intensities | 178.89  | 13.16   | 36.59   | 6.19    | 13.05   | 25.26   |
| reduc. mass | 1.21    | 0.77    | 0.96    | 0.72    | 0.71    | 0.56    |
| force const | 1.73    | 1.12    | 1.42    | 1.10    | 1.12    | 0.89    |

|             |    |    |    |    |    |    |
|-------------|----|----|----|----|----|----|
| vibration # | 85 | 86 | 87 | 88 | 89 | 90 |
|-------------|----|----|----|----|----|----|

-----

|             |         |         |         |         |         |         |
|-------------|---------|---------|---------|---------|---------|---------|
| frequencies | 1648.14 | 1655.87 | 1658.82 | 1662.34 | 1664.80 | 1667.02 |
| intensities | 105.24  | 9.56    | 7.79    | 81.07   | 24.01   | 1.84    |
| reduc. mass | 0.52    | 0.34    | 0.39    | 0.26    | 0.32    | 0.35    |
| force const | 0.83    | 0.56    | 0.64    | 0.42    | 0.52    | 0.57    |

|             |    |    |    |    |    |    |
|-------------|----|----|----|----|----|----|
| vibration # | 91 | 92 | 93 | 94 | 95 | 96 |
|-------------|----|----|----|----|----|----|

-----

|             |         |         |         |         |         |         |
|-------------|---------|---------|---------|---------|---------|---------|
| frequencies | 1669.13 | 1672.30 | 1684.96 | 1686.48 | 1723.50 | 1802.41 |
| intensities | 9.47    | 10.71   | 33.06   | 88.12   | 39.77   | 830.80  |
| reduc. mass | 0.17    | 0.38    | 0.26    | 0.77    | 1.04    | 1.47    |

|             |      |      |      |      |      |      |
|-------------|------|------|------|------|------|------|
| force const | 0.29 | 0.62 | 0.44 | 1.29 | 1.82 | 2.82 |
|-------------|------|------|------|------|------|------|

|             |    |    |    |     |     |     |
|-------------|----|----|----|-----|-----|-----|
| vibration # | 97 | 98 | 99 | 100 | 101 | 102 |
|-------------|----|----|----|-----|-----|-----|

-----

|             |         |         |         |         |         |         |
|-------------|---------|---------|---------|---------|---------|---------|
| frequencies | 1838.89 | 1889.59 | 3022.62 | 3023.91 | 3036.90 | 3050.77 |
|-------------|---------|---------|---------|---------|---------|---------|

|             |        |       |        |        |        |        |
|-------------|--------|-------|--------|--------|--------|--------|
| intensities | 394.83 | 11.08 | 467.86 | 249.05 | 641.12 | 487.25 |
|-------------|--------|-------|--------|--------|--------|--------|

|             |      |      |      |      |      |      |
|-------------|------|------|------|------|------|------|
| reduc. mass | 1.39 | 0.85 | 0.29 | 0.29 | 0.30 | 0.47 |
|-------------|------|------|------|------|------|------|

|             |      |      |      |      |      |      |
|-------------|------|------|------|------|------|------|
| force const | 2.77 | 1.80 | 1.57 | 1.55 | 1.65 | 2.56 |
|-------------|------|------|------|------|------|------|

|             |     |     |     |     |     |     |
|-------------|-----|-----|-----|-----|-----|-----|
| vibration # | 103 | 104 | 105 | 106 | 107 | 108 |
|-------------|-----|-----|-----|-----|-----|-----|

-----

|             |         |         |         |         |         |         |
|-------------|---------|---------|---------|---------|---------|---------|
| frequencies | 3057.90 | 3074.39 | 3081.82 | 3091.82 | 3101.53 | 3118.80 |
|-------------|---------|---------|---------|---------|---------|---------|

|             |        |        |        |        |        |        |
|-------------|--------|--------|--------|--------|--------|--------|
| intensities | 607.49 | 472.77 | 150.21 | 442.73 | 197.37 | 449.47 |
|-------------|--------|--------|--------|--------|--------|--------|

|             |      |      |      |      |      |      |
|-------------|------|------|------|------|------|------|
| reduc. mass | 0.45 | 0.92 | 0.80 | 0.47 | 0.82 | 0.52 |
|-------------|------|------|------|------|------|------|

|             |      |      |      |      |      |      |
|-------------|------|------|------|------|------|------|
| force const | 2.48 | 5.11 | 4.50 | 2.64 | 4.64 | 3.00 |
|-------------|------|------|------|------|------|------|

|             |     |     |     |     |     |     |
|-------------|-----|-----|-----|-----|-----|-----|
| vibration # | 109 | 110 | 111 | 112 | 113 | 114 |
|-------------|-----|-----|-----|-----|-----|-----|

-----

|             |         |         |         |         |         |         |
|-------------|---------|---------|---------|---------|---------|---------|
| frequencies | 3126.25 | 3129.52 | 3135.89 | 3137.29 | 3145.64 | 3146.93 |
|-------------|---------|---------|---------|---------|---------|---------|

|             |        |        |        |        |        |        |
|-------------|--------|--------|--------|--------|--------|--------|
| intensities | 297.33 | 454.75 | 272.49 | 689.92 | 413.62 | 109.51 |
|-------------|--------|--------|--------|--------|--------|--------|

|             |      |      |      |      |      |      |
|-------------|------|------|------|------|------|------|
| reduc. mass | 0.42 | 0.42 | 0.28 | 0.28 | 0.53 | 0.46 |
|-------------|------|------|------|------|------|------|

|             |      |      |      |      |      |      |
|-------------|------|------|------|------|------|------|
| force const | 2.42 | 2.42 | 1.62 | 1.65 | 3.07 | 2.69 |
|-------------|------|------|------|------|------|------|

|             |     |     |     |     |     |     |
|-------------|-----|-----|-----|-----|-----|-----|
| vibration # | 115 | 116 | 117 | 118 | 119 | 120 |
|-------------|-----|-----|-----|-----|-----|-----|

-----

|             |         |         |         |         |         |         |
|-------------|---------|---------|---------|---------|---------|---------|
| frequencies | 3149.34 | 3153.39 | 3156.72 | 3195.82 | 3842.11 | 3849.28 |
|-------------|---------|---------|---------|---------|---------|---------|

|             |        |        |        |        |       |        |
|-------------|--------|--------|--------|--------|-------|--------|
| intensities | 307.66 | 543.28 | 228.75 | 311.19 | 70.39 | 116.45 |
|-------------|--------|--------|--------|--------|-------|--------|

|             |      |      |      |      |      |      |
|-------------|------|------|------|------|------|------|
| reduc. mass | 0.54 | 0.73 | 0.83 | 0.56 | 0.93 | 0.93 |
|-------------|------|------|------|------|------|------|

|             |      |      |      |      |      |      |
|-------------|------|------|------|------|------|------|
| force const | 3.15 | 4.27 | 4.87 | 3.36 | 8.05 | 8.09 |
|-------------|------|------|------|------|------|------|

Number of imaginary frequencies:

## Conformation 2

Boltzmann Population = 24.3% (relative energy = 0.32 kcal/mol)

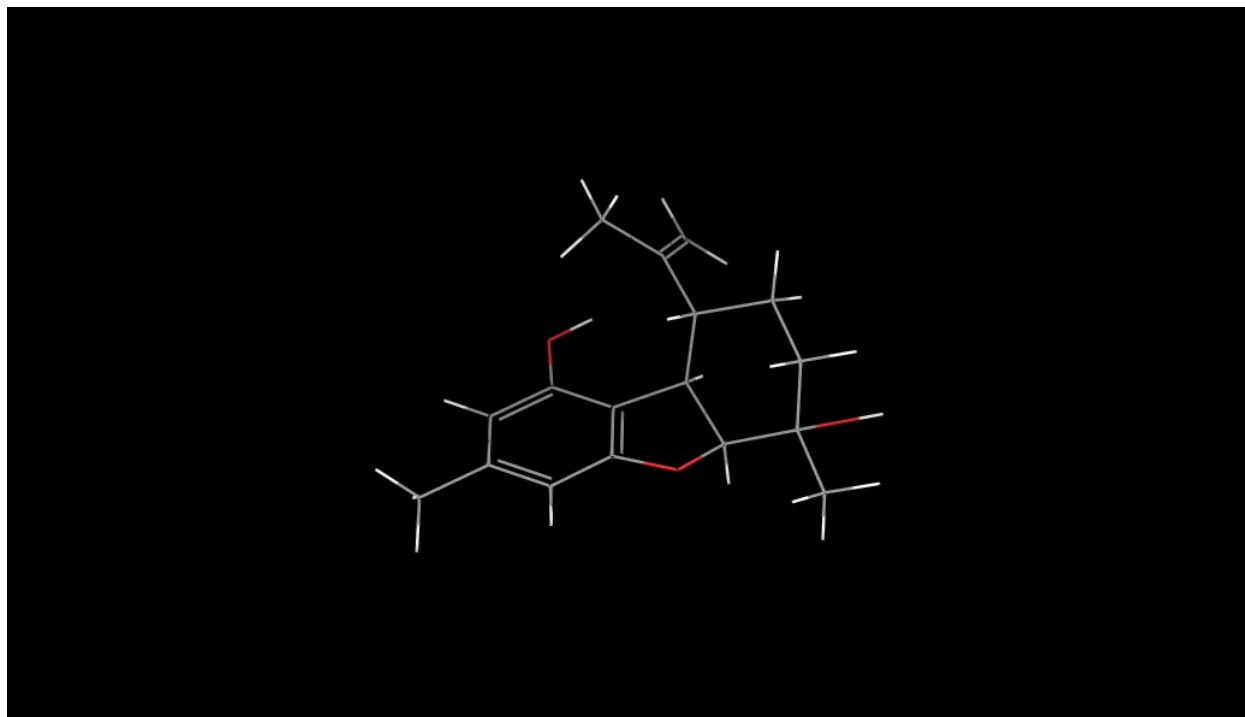

Geometries and Energy Method: M06-2X-D3/6-31G(d,p)

NMR Method: mPW1PW91/6-311+G(2d,p)

Thermodynamic properties for P = 1.00 atm, calculated at 1 temperatures

T = 298.15 K, P = 1.00 atm

Total internal energy,  $U_{\text{tot}}(\text{SCFE} + \text{ZPE} + \text{U})$ : -885.983588 hartrees

Total enthalpy,  $H_{\text{tot}}(U_{\text{tot}} + pV)$ : -885.982644 hartrees

Total Gibbs free energy,  $G_{\text{tot}}(H_{\text{tot}} - T^*S)$ : -886.044700 hartrees

### Optimized Geometry:

| Center<br>Number | Atomic<br>Number | Atomic<br>Type | Coordinates (Angstroms) |           |           |
|------------------|------------------|----------------|-------------------------|-----------|-----------|
|                  |                  |                | X                       | Y         | Z         |
| 1                | 6                | 0              | -6.052500               | -0.656100 | -2.563700 |
| 2                | 6                | 0              | -4.588400               | -0.353100 | -2.877300 |
| 3                | 6                | 0              | -3.893800               | -1.630700 | -3.360200 |
| 4                | 6                | 0              | -3.972400               | -2.755800 | -2.299100 |

|    |   |   |           |           |           |
|----|---|---|-----------|-----------|-----------|
| 5  | 6 | 0 | -5.385400 | -2.948100 | -1.718600 |
| 6  | 6 | 0 | -6.178700 | -1.675800 | -1.427000 |
| 7  | 6 | 0 | -7.635300 | -2.008400 | -1.126000 |
| 8  | 6 | 0 | -2.454700 | -1.412000 | -3.797900 |
| 9  | 6 | 0 | -3.817600 | -4.099100 | -2.976300 |
| 10 | 6 | 0 | -5.103300 | -4.589100 | -3.214000 |
| 11 | 6 | 0 | -2.729500 | -4.780300 | -3.502900 |
| 12 | 6 | 0 | -2.955600 | -5.961900 | -4.223200 |
| 13 | 6 | 0 | -4.246100 | -6.436100 | -4.440900 |
| 14 | 6 | 0 | -5.354600 | -5.739400 | -3.934300 |
| 15 | 8 | 0 | -1.446900 | -4.356000 | -3.367700 |
| 16 | 8 | 0 | -6.069000 | -3.782000 | -2.670600 |
| 17 | 8 | 0 | -5.531100 | -1.174900 | -0.257300 |
| 18 | 6 | 0 | -4.469000 | -7.712600 | -5.212900 |
| 19 | 6 | 0 | -2.148900 | -1.716800 | -5.237900 |
| 20 | 6 | 0 | -1.518500 | -0.990800 | -2.940800 |
| 21 | 1 | 0 | -6.555100 | -1.053100 | -3.454300 |
| 22 | 1 | 0 | -6.589800 | 0.256800  | -2.274600 |
| 23 | 1 | 0 | -4.509200 | 0.421300  | -3.647400 |
| 24 | 1 | 0 | -4.090900 | 0.025500  | -1.977900 |
| 25 | 1 | 0 | -4.457700 | -1.988700 | -4.232900 |
| 26 | 1 | 0 | -3.262400 | -2.558500 | -1.490200 |
| 27 | 1 | 0 | -5.307000 | -3.508600 | -0.776100 |
| 28 | 1 | 0 | -8.179600 | -1.096100 | -0.857300 |
| 29 | 1 | 0 | -8.118700 | -2.459700 | -1.994500 |
| 30 | 1 | 0 | -7.693900 | -2.707300 | -0.287400 |
| 31 | 1 | 0 | -2.095400 | -6.491700 | -4.618800 |
| 32 | 1 | 0 | -6.368500 | -6.089000 | -4.094200 |
| 33 | 1 | 0 | -1.441200 | -3.460600 | -2.997500 |
| 34 | 1 | 0 | -5.981200 | -0.361400 | 0.000900  |
| 35 | 1 | 0 | -3.554500 | -8.041500 | -5.710300 |
| 36 | 1 | 0 | -4.799300 | -8.516600 | -4.547700 |
| 37 | 1 | 0 | -5.244000 | -7.579300 | -5.973100 |
| 38 | 1 | 0 | -2.762400 | -1.089500 | -5.894700 |
| 39 | 1 | 0 | -1.096400 | -1.550900 | -5.477200 |
| 40 | 1 | 0 | -2.401300 | -2.759400 | -5.464100 |
| 41 | 1 | 0 | -0.493000 | -0.829700 | -3.259300 |
| 42 | 1 | 0 | -1.751800 | -0.769200 | -1.902400 |

-----

SCF GIAO Magnetic shielding tensor (ppm):

|              |          |             |          |              |          |
|--------------|----------|-------------|----------|--------------|----------|
| 1            | C        | Isotropic = | 147.6671 | Anisotropy = | 22.0578  |
| XX=          | 142.7813 | YX=         | -1.7247  | ZX=          | 3.0509   |
| XY=          | -7.5685  | YY=         | 154.4948 | ZY=          | 9.4693   |
| XZ=          | -4.0115  | YZ=         | 11.5359  | ZZ=          | 145.7252 |
| Eigenvalues: | 137.6547 | 142.9743    | 162.3723 |              |          |
| 2            | C        | Isotropic = | 157.9013 | Anisotropy = | 23.2390  |
| XX=          | 166.6189 | YX=         | -8.2506  | ZX=          | 6.4787   |
| XY=          | -3.1470  | YY=         | 160.4962 | ZY=          | -6.4401  |
| XZ=          | 7.7887   | YZ=         | -6.5681  | ZZ=          | 146.5890 |
| Eigenvalues: | 143.0134 | 157.2965    | 173.3940 |              |          |

|              |           |             |          |              |          |
|--------------|-----------|-------------|----------|--------------|----------|
| 3            | C         | Isotropic = | 135.8122 | Anisotropy = | 11.2599  |
| XX=          | 141.3005  | YX=         | -3.8254  | ZX=          | -0.5061  |
| XY=          | 8.5788    | YY=         | 140.3025 | ZY=          | -3.3502  |
| XZ=          | 6.6421    | YZ=         | -7.2157  | ZZ=          | 125.8337 |
| Eigenvalues: | 123.3620  | 140.7559    | 143.3188 |              |          |
| 4            | C         | Isotropic = | 135.8645 | Anisotropy = | 28.3604  |
| XX=          | 127.0381  | YX=         | 4.8436   | ZX=          | 2.0517   |
| XY=          | 3.4601    | YY=         | 151.7713 | ZY=          | -3.4354  |
| XZ=          | 7.5567    | YZ=         | 17.4674  | ZZ=          | 128.7840 |
| Eigenvalues: | 122.9512  | 129.8707    | 154.7714 |              |          |
| 5            | C         | Isotropic = | 97.3788  | Anisotropy = | 57.0800  |
| XX=          | 117.8137  | YX=         | 11.8011  | ZX=          | -19.2985 |
| XY=          | 3.8964    | YY=         | 92.6681  | ZY=          | -23.4052 |
| XZ=          | -27.4683  | YZ=         | -15.5287 | ZZ=          | 81.6545  |
| Eigenvalues: | 62.7053   | 93.9989     | 135.4321 |              |          |
| 6            | C         | Isotropic = | 115.5928 | Anisotropy = | 54.2499  |
| XX=          | 114.1450  | YX=         | 11.8572  | ZX=          | -29.8773 |
| XY=          | 8.5601    | YY=         | 111.1503 | ZY=          | -10.5964 |
| XZ=          | -26.0036  | YZ=         | -12.2000 | ZZ=          | 121.4831 |
| Eigenvalues: | 89.6323   | 105.3867    | 151.7594 |              |          |
| 7            | C         | Isotropic = | 157.6089 | Anisotropy = | 44.8854  |
| XX=          | 145.4052  | YX=         | -11.8846 | ZX=          | 1.2116   |
| XY=          | -7.5161   | YY=         | 184.7111 | ZY=          | -4.3113  |
| XZ=          | -0.6472   | YZ=         | -5.8236  | ZZ=          | 142.7103 |
| Eigenvalues: | 141.6453  | 143.6489    | 187.5324 |              |          |
| 8            | C         | Isotropic = | 16.8506  | Anisotropy = | 212.3856 |
| XX=          | 42.1418   | YX=         | 81.2167  | ZX=          | 101.5621 |
| XY=          | 83.3703   | YY=         | -28.0805 | ZY=          | -5.2563  |
| XZ=          | 96.9746   | YZ=         | 2.9721   | ZZ=          | 36.4906  |
| Eigenvalues: | -109.7472 | 1.8580      | 158.4411 |              |          |
| 9            | C         | Isotropic = | 68.1335  | Anisotropy = | 109.7793 |
| XX=          | 23.8231   | YX=         | -1.7045  | ZX=          | 8.6870   |
| XY=          | -16.7931  | YY=         | 60.0124  | ZY=          | 38.9722  |
| XZ=          | 15.0092   | YZ=         | 42.2939  | ZZ=          | 120.5651 |
| Eigenvalues: | 15.7602   | 47.3207     | 141.3198 |              |          |
| 10           | C         | Isotropic = | 20.7575  | Anisotropy = | 110.1366 |
| XX=          | -32.3950  | YX=         | 33.5083  | ZX=          | -4.6388  |
| XY=          | 43.5082   | YY=         | 11.9417  | ZY=          | 35.8827  |
| XZ=          | -16.4881  | YZ=         | 25.1622  | ZZ=          | 82.7258  |
| Eigenvalues: | -59.0154  | 27.1060     | 94.1819  |              |          |
| 11           | C         | Isotropic = | 28.0795  | Anisotropy = | 135.4805 |
| XX=          | 14.8724   | YX=         | -6.4604  | ZX=          | 10.2551  |
| XY=          | -0.5721   | YY=         | -26.0746 | ZY=          | 61.1438  |
| XZ=          | 6.8151    | YZ=         | 52.7970  | ZZ=          | 95.4408  |
| Eigenvalues: | -49.2495  | 15.0882     | 118.3999 |              |          |
| 12           | C         | Isotropic = | 74.3263  | Anisotropy = | 114.4930 |
| XX=          | 21.3712   | YX=         | 31.1989  | ZX=          | -3.7848  |
| XY=          | 42.0269   | YY=         | 62.5391  | ZY=          | 35.9609  |
| XZ=          | -3.8124   | YZ=         | 25.9274  | ZZ=          | 139.0687 |
| Eigenvalues: | -2.7006   | 75.0247     | 150.6550 |              |          |
| 13           | C         | Isotropic = | 41.3562  | Anisotropy = | 193.5352 |
| XX=          | -40.7816  | YX=         | -15.3216 | ZX=          | 22.9869  |



|              |          |             |          |              |          |          |
|--------------|----------|-------------|----------|--------------|----------|----------|
| XY=          | -18.2033 | YY=         | 29.7066  | ZY=          | 66.7232  |          |
| XZ=          | 29.9820  | YZ=         | 70.8537  | ZZ=          | 135.1435 |          |
| Eigenvalues: | -55.8383 |             | 9.5271   |              | 170.3796 |          |
| 14           | C        | Isotropic = | 81.5049  | Anisotropy = |          | 122.6674 |
| XX=          | 74.4386  | YX=         | 10.2735  | ZX=          | 2.9895   |          |
| XY=          | -6.4322  | YY=         | 33.3274  | ZY=          | 60.7925  |          |
| XZ=          | 5.6428   | YZ=         | 55.9817  | ZZ=          | 136.7488 |          |
| Eigenvalues: | 7.0442   |             | 74.1874  |              | 163.2832 |          |
| 15           | O        | Isotropic = | 202.8368 | Anisotropy = |          | 76.1666  |
| XX=          | 147.0906 | YX=         | 13.6827  | ZX=          | 0.6158   |          |
| XY=          | 6.5367   | YY=         | 210.9614 | ZY=          | 10.4376  |          |
| XZ=          | 24.6111  | YZ=         | -29.4833 | ZZ=          | 250.4585 |          |
| Eigenvalues: | 143.6997 |             | 211.1962 |              | 253.6146 |          |
| 16           | O        | Isotropic = | 189.2698 | Anisotropy = |          | 117.7058 |
| XX=          | 224.5859 | YX=         | -61.5407 | ZX=          | 35.4855  |          |
| XY=          | -47.4961 | YY=         | 157.0777 | ZY=          | 30.5299  |          |
| XZ=          | 34.9904  | YZ=         | -35.4582 | ZZ=          | 186.1457 |          |
| Eigenvalues: | 122.6761 |             | 177.3929 |              | 267.7403 |          |
| 17           | O        | Isotropic = | 247.2430 | Anisotropy = |          | 93.5963  |
| XX=          | 308.6738 | YX=         | 11.6473  | ZX=          | -15.3188 |          |
| XY=          | 4.0421   | YY=         | 200.5081 | ZY=          | -5.8176  |          |
| XZ=          | 5.3856   | YZ=         | -10.4483 | ZZ=          | 232.5473 |          |
| Eigenvalues: | 198.1783 |             | 233.9102 |              | 309.6406 |          |
| 18           | C        | Isotropic = | 163.8385 | Anisotropy = |          | 41.4833  |
| XX=          | 186.0189 | YX=         | 6.8138   | ZX=          | -9.3712  |          |
| XY=          | 12.9253  | YY=         | 157.8903 | ZY=          | -9.2121  |          |
| XZ=          | -6.8841  | YZ=         | -6.3503  | ZZ=          | 147.6063 |          |
| Eigenvalues: | 143.2425 |             | 156.7791 |              | 191.4941 |          |
| 19           | C        | Isotropic = | 157.9626 | Anisotropy = |          | 42.5385  |
| XX=          | 158.9190 | YX=         | -15.3714 | ZX=          | -17.3422 |          |
| XY=          | -12.0723 | YY=         | 159.8984 | ZY=          | 8.8407   |          |
| XZ=          | -18.9870 | YZ=         | 11.7281  | ZZ=          | 155.0703 |          |
| Eigenvalues: | 138.5533 |             | 149.0129 |              | 186.3215 |          |
| 20           | C        | Isotropic = | 72.1357  | Anisotropy = |          | 131.0835 |
| XX=          | 89.0191  | YX=         | 76.8064  | ZX=          | 48.7645  |          |
| XY=          | 72.9334  | YY=         | 24.8007  | ZY=          | -15.9101 |          |
| XZ=          | 49.7865  | YZ=         | -18.2457 | ZZ=          | 102.5873 |          |
| Eigenvalues: | -37.3166 |             | 94.1990  |              | 159.5247 |          |
| 21           | H        | Isotropic = | 29.9890  | Anisotropy = |          | 6.0700   |
| XX=          | 27.4460  | YX=         | -0.7828  | ZX=          | -0.8749  |          |
| XY=          | 0.1276   | YY=         | 28.9965  | ZY=          | -1.4198  |          |
| XZ=          | 0.3728   | YZ=         | -1.7794  | ZZ=          | 33.5246  |          |
| Eigenvalues: | 27.3146  |             | 28.6168  |              | 34.0357  |          |
| 22           | H        | Isotropic = | 30.4436  | Anisotropy = |          | 8.5245   |
| XX=          | 33.5581  | YX=         | -2.2351  | ZX=          | 3.8968   |          |
| XY=          | -1.7921  | YY=         | 29.7424  | ZY=          | 0.2831   |          |
| XZ=          | 4.1466   | YZ=         | 0.1422   | ZZ=          | 28.0303  |          |
| Eigenvalues: | 25.5872  |             | 29.6170  |              | 36.1265  |          |
| 23           | H        | Isotropic = | 30.4381  | Anisotropy = |          | 9.5373   |
| XX=          | 29.9690  | YX=         | 0.6546   | ZX=          | 3.9574   |          |
| XY=          | 0.9585   | YY=         | 31.1689  | ZY=          | 4.4741   |          |
| XZ=          | 4.3209   | YZ=         | 4.0852   | ZZ=          | 30.1764  |          |

|              |             |         |              |         |         |
|--------------|-------------|---------|--------------|---------|---------|
| Eigenvalues: | 24.7711     | 29.7469 | 36.7963      |         |         |
| 24 H         | Isotropic = | 29.8180 | Anisotropy = | 5.8030  |         |
| XX=          | 30.8420     | YX=     | 1.3110       | ZX=     | -2.6321 |
| XY=          | 1.5127      | YY=     | 31.5530      | ZY=     | -1.8301 |
| XZ=          | -1.7811     | YZ=     | -1.2876      | ZZ=     | 27.0589 |
| Eigenvalues: | 25.9079     | 29.8593 | 33.6866      |         |         |
| 25 H         | Isotropic = | 30.1302 | Anisotropy = | 3.7995  |         |
| XX=          | 30.8205     | YX=     | -1.7091      | ZX=     | -2.3344 |
| XY=          | -0.1903     | YY=     | 29.7859      | ZY=     | 0.5566  |
| XZ=          | 0.0515      | YZ=     | 2.8216       | ZZ=     | 29.7842 |
| Eigenvalues: | 28.0871     | 29.6403 | 32.6632      |         |         |
| 26 H         | Isotropic = | 28.5622 | Anisotropy = | 4.5451  |         |
| XX=          | 27.3206     | YX=     | -0.0943      | ZX=     | 0.0568  |
| XY=          | -1.7865     | YY=     | 29.1857      | ZY=     | -2.1112 |
| XZ=          | -0.9610     | YZ=     | -2.6485      | ZZ=     | 29.1803 |
| Eigenvalues: | 26.0358     | 28.0585 | 31.5922      |         |         |
| 27 H         | Isotropic = | 27.6230 | Anisotropy = | 4.9297  |         |
| XX=          | 26.8061     | YX=     | 0.6798       | ZX=     | -1.1596 |
| XY=          | -1.1137     | YY=     | 27.4223      | ZY=     | 0.9060  |
| XZ=          | -3.1260     | YZ=     | 2.8657       | ZZ=     | 28.6407 |
| Eigenvalues: | 24.9969     | 26.9627 | 30.9095      |         |         |
| 28 H         | Isotropic = | 30.9536 | Anisotropy = | 8.8686  |         |
| XX=          | 33.7492     | YX=     | -3.1143      | ZX=     | 1.7862  |
| XY=          | -4.3521     | YY=     | 31.3856      | ZY=     | -0.8075 |
| XZ=          | 1.7936      | YZ=     | -0.6268      | ZZ=     | 27.7262 |
| Eigenvalues: | 27.1933     | 28.8016 | 36.8660      |         |         |
| 29 H         | Isotropic = | 29.9853 | Anisotropy = | 8.3508  |         |
| XX=          | 29.2262     | YX=     | 0.0357       | ZX=     | -1.8226 |
| XY=          | 0.5722      | YY=     | 32.3233      | ZY=     | -4.7871 |
| XZ=          | -1.8064     | YZ=     | -4.2686      | ZZ=     | 28.4063 |
| Eigenvalues: | 24.9860     | 29.4173 | 35.5525      |         |         |
| 30 H         | Isotropic = | 30.3310 | Anisotropy = | 9.0934  |         |
| XX=          | 27.9468     | YX=     | -1.1015      | ZX=     | -0.0413 |
| XY=          | -1.0241     | YY=     | 34.0540      | ZY=     | 4.6808  |
| XZ=          | -0.0370     | YZ=     | 3.3897       | ZZ=     | 28.9922 |
| Eigenvalues: | 26.5789     | 28.0207 | 36.3933      |         |         |
| 31 H         | Isotropic = | 25.3006 | Anisotropy = | 6.6714  |         |
| XX=          | 27.0913     | YX=     | 2.2731       | ZX=     | -0.9506 |
| XY=          | 2.5069      | YY=     | 26.2822      | ZY=     | -2.2792 |
| XZ=          | -0.6595     | YZ=     | -2.3322      | ZZ=     | 22.5282 |
| Eigenvalues: | 21.4128     | 24.7408 | 29.7481      |         |         |
| 32 H         | Isotropic = | 25.3702 | Anisotropy = | 7.4452  |         |
| XX=          | 30.1452     | YX=     | 0.4609       | ZX=     | -0.7902 |
| XY=          | 0.9546      | YY=     | 24.1967      | ZY=     | -1.2735 |
| XZ=          | -0.7729     | YZ=     | -1.4665      | ZZ=     | 21.7688 |
| Eigenvalues: | 21.1319     | 24.6451 | 30.3337      |         |         |
| 33 H         | Isotropic = | 26.4630 | Anisotropy = | 16.8420 |         |
| XX=          | 35.2212     | YX=     | 4.1769       | ZX=     | 3.3059  |
| XY=          | 6.0480      | YY=     | 26.1854      | ZY=     | -2.7305 |
| XZ=          | 2.0190      | YZ=     | -0.4049      | ZZ=     | 17.9825 |
| Eigenvalues: | 16.9142     | 24.7838 | 37.6911      |         |         |
| 34 H         | Isotropic = | 32.2093 | Anisotropy = | 17.5947 |         |

|              |             |         |         |              |         |        |  |
|--------------|-------------|---------|---------|--------------|---------|--------|--|
| XX=          | 43.6564     | YX=     | -0.1200 | ZX=          | -1.5531 |        |  |
| XY=          | 0.4593      | YY=     | 25.2274 | ZY=          | -1.1773 |        |  |
| XZ=          | -2.6768     | YZ=     | -1.5777 | ZZ=          | 27.7442 |        |  |
| Eigenvalues: | 24.5929     |         | 28.0959 |              | 43.9391 |        |  |
| 35 H         | Isotropic = | 29.8512 |         | Anisotropy = |         | 7.8672 |  |
| XX=          | 34.3479     | YX=     | -3.1160 | ZX=          | -0.5179 |        |  |
| XY=          | -0.7700     | YY=     | 29.8366 | ZY=          | -1.5440 |        |  |
| XZ=          | -1.5816     | YZ=     | -1.2559 | ZZ=          | 25.3692 |        |  |
| Eigenvalues: | 24.7068     |         | 29.7508 |              | 35.0961 |        |  |
| 36 H         | Isotropic = | 29.3315 |         | Anisotropy = |         | 8.9891 |  |
| XX=          | 30.4422     | YX=     | 3.6315  | ZX=          | 1.0997  |        |  |
| XY=          | 3.2891      | YY=     | 31.1924 | ZY=          | 2.1204  |        |  |
| XZ=          | 2.1995      | YZ=     | 3.0559  | ZZ=          | 26.3600 |        |  |
| Eigenvalues: | 25.2298     |         | 27.4406 |              | 35.3243 |        |  |
| 37 H         | Isotropic = | 29.4704 |         | Anisotropy = |         | 8.0710 |  |
| XX=          | 29.8966     | YX=     | 1.7341  | ZX=          | -2.4008 |        |  |
| XY=          | 0.2044      | YY=     | 27.2116 | ZY=          | -3.5882 |        |  |
| XZ=          | -1.9825     | YZ=     | -4.3201 | ZZ=          | 31.3031 |        |  |
| Eigenvalues: | 24.7837     |         | 28.7765 |              | 34.8511 |        |  |
| 38 H         | Isotropic = | 30.0529 |         | Anisotropy = |         | 7.9614 |  |
| XX=          | 27.4007     | YX=     | -0.8187 | ZX=          | 0.6443  |        |  |
| XY=          | -1.0935     | YY=     | 28.4032 | ZY=          | 2.7540  |        |  |
| XZ=          | 1.0738      | YZ=     | 2.4513  | ZZ=          | 34.3547 |        |  |
| Eigenvalues: | 26.2038     |         | 28.5943 |              | 35.3605 |        |  |
| 39 H         | Isotropic = | 29.9826 |         | Anisotropy = |         | 8.7694 |  |
| XX=          | 28.1900     | YX=     | -3.7264 | ZX=          | -0.7346 |        |  |
| XY=          | -2.1380     | YY=     | 34.3453 | ZY=          | -0.1039 |        |  |
| XZ=          | -1.3738     | YZ=     | 2.7361  | ZZ=          | 27.4124 |        |  |
| Eigenvalues: | 26.5765     |         | 27.5425 |              | 35.8289 |        |  |
| 40 H         | Isotropic = | 29.9857 |         | Anisotropy = |         | 5.6913 |  |
| XX=          | 32.3157     | YX=     | 2.3642  | ZX=          | -1.3434 |        |  |
| XY=          | 1.8119      | YY=     | 30.0870 | ZY=          | 2.3128  |        |  |
| XZ=          | -0.2722     | YZ=     | 4.0572  | ZZ=          | 27.5542 |        |  |
| Eigenvalues: | 24.9207     |         | 31.2564 |              | 33.7799 |        |  |
| 41 H         | Isotropic = | 26.3562 |         | Anisotropy = |         | 5.5294 |  |
| XX=          | 25.2986     | YX=     | 3.0941  | ZX=          | -1.1331 |        |  |
| XY=          | 1.1238      | YY=     | 27.4965 | ZY=          | -1.2261 |        |  |
| XZ=          | 0.1575      | YZ=     | -3.2316 | ZZ=          | 26.2736 |        |  |
| Eigenvalues: | 23.6917     |         | 25.3345 |              | 30.0425 |        |  |
| 42 H         | Isotropic = | 26.3123 |         | Anisotropy = |         | 8.1556 |  |
| XX=          | 24.8889     | YX=     | 0.7231  | ZX=          | 0.3516  |        |  |
| XY=          | 3.3779      | YY=     | 28.2573 | ZY=          | -5.9205 |        |  |
| XZ=          | -0.7613     | YZ=     | -2.2367 | ZZ=          | 25.7908 |        |  |
| Eigenvalues: | 22.2705     |         | 24.9171 |              | 31.7494 |        |  |

Number of frequencies: 120

harmonic frequencies in  $\text{cm}^{-1}$ , reduced masses in amu,

force constants in mDyne/A, and

normal modes in cartesian coordinates: 120

IR intensities in  $\text{km/mol}$

|             |        |        |        |        |        |        |
|-------------|--------|--------|--------|--------|--------|--------|
| vibration # | 1      | 2      | 3      | 4      | 5      | 6      |
| -----       |        |        |        |        |        |        |
| frequencies | 59.14  | 87.68  | 94.71  | 109.12 | 126.58 | 138.04 |
| intensities | 0.61   | 0.25   | 1.41   | 0.83   | 0.79   | 3.02   |
| reduc. mass | 1.40   | 0.84   | 1.09   | 1.32   | 0.28   | 1.29   |
| force const | 0.00   | 0.00   | 0.01   | 0.01   | 0.00   | 0.01   |
|             |        |        |        |        |        |        |
| vibration # | 7      | 8      | 9      | 10     | 11     | 12     |
| -----       |        |        |        |        |        |        |
| frequencies | 165.66 | 192.76 | 222.97 | 246.86 | 253.37 | 266.47 |
| intensities | 0.69   | 0.55   | 1.10   | 0.95   | 6.21   | 6.14   |
| reduc. mass | 0.73   | 0.76   | 1.48   | 0.68   | 0.71   | 1.31   |
| force const | 0.01   | 0.02   | 0.04   | 0.02   | 0.03   | 0.05   |
|             |        |        |        |        |        |        |
| vibration # | 13     | 14     | 15     | 16     | 17     | 18     |
| -----       |        |        |        |        |        |        |
| frequencies | 268.27 | 294.19 | 298.92 | 305.26 | 314.60 | 343.16 |
| intensities | 0.58   | 3.40   | 1.43   | 0.96   | 0.27   | 7.97   |
| reduc. mass | 0.89   | 0.27   | 1.24   | 0.32   | 0.30   | 1.35   |
| force const | 0.04   | 0.01   | 0.07   | 0.02   | 0.02   | 0.09   |
|             |        |        |        |        |        |        |
| vibration # | 19     | 20     | 21     | 22     | 23     | 24     |
| -----       |        |        |        |        |        |        |

|             |        |        |        |        |        |        |
|-------------|--------|--------|--------|--------|--------|--------|
| frequencies | 354.19 | 401.20 | 420.57 | 450.34 | 470.29 | 495.73 |
| intensities | 4.34   | 1.78   | 6.41   | 2.54   | 20.86  | 10.94  |
| reduc. mass | 0.77   | 0.55   | 0.49   | 0.68   | 0.51   | 0.79   |
| force const | 0.06   | 0.05   | 0.05   | 0.08   | 0.07   | 0.11   |

vibration #      25    26    27    28    29    30

-----

|             |        |        |        |        |        |        |
|-------------|--------|--------|--------|--------|--------|--------|
| frequencies | 520.48 | 524.23 | 543.65 | 556.16 | 565.43 | 602.39 |
| intensities | 8.82   | 13.83  | 3.00   | 23.71  | 43.32  | 25.99  |
| reduc. mass | 0.47   | 2.09   | 0.53   | 0.56   | 0.49   | 2.16   |
| force const | 0.08   | 0.34   | 0.09   | 0.10   | 0.09   | 0.46   |

vibration #      31    32    33    34    35    36

-----

|             |        |        |        |        |        |        |
|-------------|--------|--------|--------|--------|--------|--------|
| frequencies | 649.40 | 664.05 | 691.94 | 706.41 | 709.52 | 717.73 |
| intensities | 79.81  | 29.64  | 9.15   | 5.34   | 15.29  | 3.07   |
| reduc. mass | 0.49   | 0.76   | 1.11   | 0.82   | 0.91   | 0.36   |
| force const | 0.12   | 0.20   | 0.31   | 0.24   | 0.27   | 0.11   |

vibration #      37    38    39    40    41    42

-----

|             |        |        |        |        |        |        |
|-------------|--------|--------|--------|--------|--------|--------|
| frequencies | 746.37 | 807.49 | 819.33 | 851.15 | 872.10 | 932.41 |
| intensities | 16.03  | 1.86   | 4.63   | 6.03   | 12.20  | 3.30   |
| reduc. mass | 0.73   | 0.99   | 1.84   | 0.75   | 0.61   | 0.75   |
| force const | 0.24   | 0.38   | 0.73   | 0.32   | 0.27   | 0.39   |

vibration #      43    44    45    46    47    48

-----

|             |        |        |        |        |         |         |
|-------------|--------|--------|--------|--------|---------|---------|
| frequencies | 938.22 | 951.95 | 956.96 | 988.32 | 1010.25 | 1016.16 |
|-------------|--------|--------|--------|--------|---------|---------|

|             |      |       |       |      |      |       |
|-------------|------|-------|-------|------|------|-------|
| intensities | 3.48 | 23.22 | 16.52 | 9.79 | 0.43 | 14.85 |
| reduc. mass | 0.45 | 0.98  | 0.31  | 0.30 | 0.22 | 0.28  |
| force const | 0.24 | 0.52  | 0.17  | 0.17 | 0.13 | 0.17  |

vibration #      49    50    51    52    53    54

-----

|             |         |         |         |         |         |         |
|-------------|---------|---------|---------|---------|---------|---------|
| frequencies | 1030.16 | 1046.38 | 1050.01 | 1054.22 | 1056.75 | 1093.60 |
| intensities | 23.64   | 2.86    | 24.94   | 4.21    | 33.93   | 8.92    |
| reduc. mass | 0.50    | 0.55    | 0.34    | 0.26    | 0.31    | 0.60    |
| force const | 0.31    | 0.35    | 0.22    | 0.17    | 0.20    | 0.43    |

vibration #      55    56    57    58    59    60

-----

|             |         |         |         |         |         |         |
|-------------|---------|---------|---------|---------|---------|---------|
| frequencies | 1113.28 | 1132.88 | 1143.29 | 1153.81 | 1164.77 | 1210.00 |
| intensities | 28.74   | 8.16    | 6.58    | 53.68   | 54.09   | 14.54   |
| reduc. mass | 0.39    | 0.56    | 0.44    | 0.71    | 0.36    | 0.32    |
| force const | 0.29    | 0.42    | 0.34    | 0.56    | 0.28    | 0.28    |

vibration #      61    62    63    64    65    66

-----

|             |         |         |         |         |         |         |
|-------------|---------|---------|---------|---------|---------|---------|
| frequencies | 1215.04 | 1228.28 | 1253.56 | 1259.29 | 1305.87 | 1321.46 |
| intensities | 108.41  | 27.30   | 65.38   | 51.58   | 43.68   | 90.20   |
| reduc. mass | 1.20    | 0.56    | 0.40    | 0.37    | 0.67    | 0.53    |
| force const | 1.04    | 0.49    | 0.37    | 0.35    | 0.67    | 0.54    |

vibration #      67    68    69    70    71    72

-----

|             |         |         |         |         |         |         |
|-------------|---------|---------|---------|---------|---------|---------|
| frequencies | 1366.62 | 1400.37 | 1401.62 | 1422.62 | 1435.28 | 1484.26 |
| intensities | 24.04   | 215.51  | 146.05  | 201.90  | 88.15   | 10.81   |

|             |      |      |      |      |      |      |
|-------------|------|------|------|------|------|------|
| reduc. mass | 0.51 | 0.44 | 0.30 | 1.15 | 0.52 | 1.44 |
| force const | 0.56 | 0.51 | 0.35 | 1.37 | 0.63 | 1.87 |

vibration #      73    74    75    76    77    78

-----

|             |         |         |         |         |         |         |
|-------------|---------|---------|---------|---------|---------|---------|
| frequencies | 1497.21 | 1505.56 | 1512.09 | 1513.98 | 1526.13 | 1531.11 |
| intensities | 7.14    | 29.86   | 77.59   | 82.28   | 23.13   | 59.43   |
| reduc. mass | 0.62    | 0.64    | 1.00    | 0.86    | 0.94    | 0.72    |
| force const | 0.82    | 0.85    | 1.35    | 1.16    | 1.29    | 1.00    |

vibration #      79    80    81    82    83    84

-----

|             |         |         |         |         |         |         |
|-------------|---------|---------|---------|---------|---------|---------|
| frequencies | 1540.40 | 1566.52 | 1587.60 | 1617.72 | 1629.26 | 1632.44 |
| intensities | 36.95   | 120.02  | 18.07   | 57.25   | 50.98   | 53.63   |
| reduc. mass | 0.57    | 0.97    | 0.52    | 0.26    | 0.23    | 0.38    |
| force const | 0.79    | 1.41    | 0.78    | 0.40    | 0.35    | 0.60    |

vibration #      85    86    87    88    89    90

-----

|             |         |         |         |         |         |         |
|-------------|---------|---------|---------|---------|---------|---------|
| frequencies | 1641.26 | 1649.60 | 1656.06 | 1658.48 | 1660.43 | 1665.29 |
| intensities | 6.60    | 29.31   | 33.09   | 72.18   | 12.61   | 2.85    |
| reduc. mass | 0.52    | 1.04    | 0.13    | 0.37    | 0.34    | 0.35    |
| force const | 0.83    | 1.67    | 0.20    | 0.60    | 0.56    | 0.57    |

vibration #      91    92    93    94    95    96

-----

|             |         |         |         |         |         |         |
|-------------|---------|---------|---------|---------|---------|---------|
| frequencies | 1669.60 | 1670.15 | 1672.21 | 1687.26 | 1687.79 | 1803.55 |
| intensities | 18.74   | 6.85    | 14.40   | 78.99   | 24.19   | 854.83  |
| reduc. mass | 0.13    | 0.27    | 0.24    | 0.55    | 0.38    | 1.63    |

force const 0.21 0.44 0.40 0.93 0.64 3.12

vibration # 97 98 99 100 101 102

-----

frequencies 1834.94 1889.25 3019.05 3023.29 3028.79 3049.45

intensities 370.85 20.27 233.88 490.19 587.60 564.50

reduc. mass 1.35 0.87 0.30 0.31 0.31 0.45

force const 2.68 1.83 1.63 1.67 1.67 2.47

vibration # 103 104 105 106 107 108

-----

frequencies 3057.36 3076.42 3077.12 3104.37 3106.12 3117.91

intensities 738.73 340.33 155.88 386.97 80.28 507.92

reduc. mass 0.42 0.83 0.68 0.35 0.27 0.44

force const 2.32 4.64 3.80 1.97 1.52 2.53

vibration # 109 110 111 112 113 114

-----

frequencies 3125.57 3130.48 3135.57 3138.04 3145.35 3148.29

intensities 386.03 135.46 447.48 628.84 575.20 78.91

reduc. mass 0.47 0.43 0.46 0.47 0.29 0.26

force const 2.69 2.48 2.69 2.72 1.67 1.53

vibration # 115 116 117 118 119 120

-----

frequencies 3152.63 3154.56 3164.94 3195.81 3826.30 3851.07

intensities 172.89 554.20 120.91 330.36 78.65 131.86

reduc. mass 0.35 0.48 0.59 0.56 0.95 0.95

force const 2.06 2.79 3.48 3.36 8.15 8.26



Number of imaginary frequencies: 0

### Conformation 3

Boltzmann Population = 1.1% (relative energy = 2.13 kcal/mol)

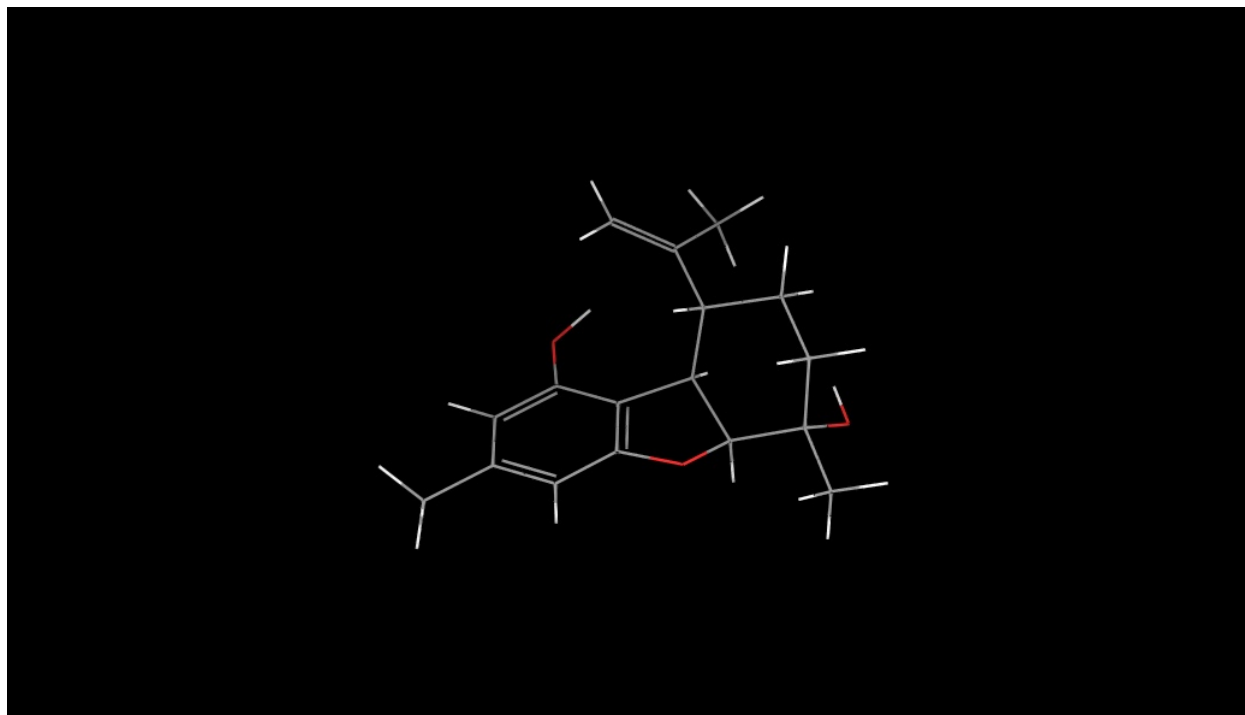

Geometries and Energy Method: M06-2X-D3/6-31G(d,p)

NMR Method: mPW1PW91/6-311+G(2d,p)

Thermodynamic properties for P = 1.00 atm, calculated at 1 temperatures

T = 298.15 K, P = 1.00 atm

Total internal energy,  $U_{\text{tot}}(\text{SCFE} + \text{ZPE} + U)$ : -885.979047 hartrees

Total enthalpy,  $H_{\text{tot}}(U_{\text{tot}} + pV)$ : -885.978103 hartrees

Total Gibbs free energy,  $G_{\text{tot}}(H_{\text{tot}} - T^*S)$ : -886.040405 hartrees

Optimized geometry:

| Center<br>Number | Atomic<br>Number | Atomic<br>Type | Coordinates (Angstroms) |           |           |
|------------------|------------------|----------------|-------------------------|-----------|-----------|
|                  |                  |                | X                       | Y         | Z         |
| 1                | 6                | 0              | -6.138600               | -0.662600 | -2.587900 |
| 2                | 6                | 0              | -4.679300               | -0.333500 | -2.898000 |
| 3                | 6                | 0              | -3.930700               | -1.587100 | -3.369700 |

|    |   |   |           |           |           |
|----|---|---|-----------|-----------|-----------|
| 4  | 6 | 0 | -4.019800 | -2.748800 | -2.338400 |
| 5  | 6 | 0 | -5.447500 | -2.949100 | -1.772600 |
| 6  | 6 | 0 | -6.253300 | -1.687700 | -1.456300 |
| 7  | 6 | 0 | -7.703000 | -2.040100 | -1.166500 |
| 8  | 6 | 0 | -2.485200 | -1.311600 | -3.730600 |
| 9  | 6 | 0 | -3.865100 | -4.090400 | -3.028000 |
| 10 | 6 | 0 | -5.150100 | -4.572400 | -3.279600 |
| 11 | 6 | 0 | -2.776800 | -4.824100 | -3.486900 |
| 12 | 6 | 0 | -3.007400 | -6.026200 | -4.165700 |
| 13 | 6 | 0 | -4.300800 | -6.485100 | -4.407700 |
| 14 | 6 | 0 | -5.405000 | -5.745100 | -3.964300 |
| 15 | 8 | 0 | -1.485300 | -4.446700 | -3.287700 |
| 16 | 8 | 0 | -6.116400 | -3.754400 | -2.758500 |
| 17 | 8 | 0 | -5.739400 | -1.148500 | -0.240900 |
| 18 | 6 | 0 | -4.516600 | -7.797700 | -5.118900 |
| 19 | 6 | 0 | -1.670100 | -0.489400 | -2.763400 |
| 20 | 6 | 0 | -1.953600 | -1.796200 | -4.856600 |
| 21 | 1 | 0 | -6.620300 | -1.071900 | -3.484000 |
| 22 | 1 | 0 | -6.687800 | 0.236900  | -2.292000 |
| 23 | 1 | 0 | -4.615900 | 0.436200  | -3.674700 |
| 24 | 1 | 0 | -4.196200 | 0.099000  | -2.010500 |
| 25 | 1 | 0 | -4.441700 | -1.942900 | -4.273400 |
| 26 | 1 | 0 | -3.304100 | -2.594400 | -1.520800 |
| 27 | 1 | 0 | -5.380200 | -3.540200 | -0.847800 |
| 28 | 1 | 0 | -8.177300 | -2.470400 | -2.050000 |
| 29 | 1 | 0 | -8.240200 | -1.137700 | -0.863700 |
| 30 | 1 | 0 | -7.753500 | -2.764000 | -0.349100 |
| 31 | 1 | 0 | -2.145600 | -6.588800 | -4.509800 |
| 32 | 1 | 0 | -6.421900 | -6.082200 | -4.130700 |
| 33 | 1 | 0 | -1.458800 | -3.483200 | -3.211100 |
| 34 | 1 | 0 | -4.811200 | -0.921200 | -0.369500 |
| 35 | 1 | 0 | -3.704500 | -8.006600 | -5.818900 |
| 36 | 1 | 0 | -4.557600 | -8.624700 | -4.402100 |
| 37 | 1 | 0 | -5.457600 | -7.795000 | -5.674100 |
| 38 | 1 | 0 | -2.009800 | 0.551700  | -2.754800 |
| 39 | 1 | 0 | -1.762900 | -0.860300 | -1.735600 |
| 40 | 1 | 0 | -0.612200 | -0.496400 | -3.033800 |
| 41 | 1 | 0 | -0.911900 | -1.625900 | -5.114100 |
| 42 | 1 | 0 | -2.546800 | -2.383000 | -5.552200 |

-----

SCF GIAO Magnetic shielding tensor (ppm):

|              |          |             |          |              |          |
|--------------|----------|-------------|----------|--------------|----------|
| 1            | C        | Isotropic = | 151.6546 | Anisotropy = | 19.3622  |
| XX=          | 146.3294 | YX=         | 0.5986   | ZX=          | 3.4848   |
| XY=          | -4.8641  | YY=         | 156.1403 | ZY=          | 10.0703  |
| XZ=          | -3.2345  | YZ=         | 9.8216   | ZZ=          | 152.4941 |
| Eigenvalues: | 143.4364 | 146.9645    | 164.5627 |              |          |
| 2            | C        | Isotropic = | 161.2063 | Anisotropy = | 18.9410  |
| XX=          | 167.0311 | YX=         | -7.1969  | ZX=          | 6.9720   |
| XY=          | -5.5485  | YY=         | 160.8185 | ZY=          | -1.3494  |
| XZ=          | 8.2150   | YZ=         | -0.8611  | ZZ=          | 155.7693 |

|              |             |          |              |                   |          |
|--------------|-------------|----------|--------------|-------------------|----------|
| Eigenvalues: | 151.4683    | 158.3169 | 173.8336     |                   |          |
| 3 C          | Isotropic = | 134.9454 | Anisotropy = | 15.0877           |          |
| XX=          | 136.4137    | YX=      | -1.3796      | ZX=               | 2.1056   |
| XY=          | 6.4706      | YY=      | 140.8074     | ZY=               | -6.4409  |
| XZ=          | 0.5099      | YZ=      | -9.7184      | <td>127.6150</td> | 127.6150 |
| Eigenvalues: | 123.3802    | 136.4520 | 145.0038     |                   |          |
| 4 C          | Isotropic = | 142.3232 | Anisotropy = | 21.3732           |          |
| XX=          | 147.8293    | YX=      | 0.0545       | ZX=               | 1.8652   |
| XY=          | 2.0064      | YY=      | 148.1992     | ZY=               | 1.9495   |
| XZ=          | 7.9845      | YZ=      | 24.3557      | <td>130.9410</td> | 130.9410 |
| Eigenvalues: | 123.2306    | 147.1669 | 156.5719     |                   |          |
| 5 C          | Isotropic = | 95.5535  | Anisotropy = | 59.8365           |          |
| XX=          | 120.0521    | YX=      | 10.2379      | ZX=               | -23.9270 |
| XY=          | -1.7573     | YY=      | 86.9351      | ZY=               | -19.3840 |
| XZ=          | -28.4132    | YZ=      | -12.4082     | <td>79.6731</td>  | 79.6731  |
| Eigenvalues: | 60.5949     | 90.6211  | 135.4444     |                   |          |
| 6 C          | Isotropic = | 116.7303 | Anisotropy = | 54.7650           |          |
| XX=          | 120.4044    | YX=      | 12.6973      | ZX=               | -28.1403 |
| XY=          | 10.2505     | YY=      | 106.9532     | ZY=               | -10.3451 |
| XZ=          | -24.3362    | YZ=      | -11.2748     | <td>122.8332</td> | 122.8332 |
| Eigenvalues: | 95.2531     | 101.6975 | 153.2403     |                   |          |
| 7 C          | Isotropic = | 161.0242 | Anisotropy = | 40.6170           |          |
| XX=          | 147.6448    | YX=      | -7.2915      | ZX=               | -0.0638  |
| XY=          | -4.3695     | YY=      | 187.2248     | ZY=               | -0.5249  |
| XZ=          | -0.4840     | YZ=      | -1.9890      | <td>148.2030</td> | 148.2030 |
| Eigenvalues: | 146.6684    | 148.3020 | 188.1022     |                   |          |
| 8 C          | Isotropic = | 29.4637  | Anisotropy = | 191.1253          |          |
| XX=          | 61.2560     | YX=      | -9.3752      | ZX=               | 76.8258  |
| XY=          | -16.1357    | YY=      | -50.7386     | ZY=               | 66.1609  |
| XZ=          | 79.1664     | YZ=      | 67.2339      | <td>77.8736</td>  | 77.8736  |
| Eigenvalues: | -92.6544    | 24.1649  | 156.8805     |                   |          |
| 9 C          | Isotropic = | 66.9265  | Anisotropy = | 110.0639          |          |
| XX=          | 19.3819     | YX=      | 2.7535       | ZX=               | 8.5829   |
| XY=          | -12.7999    | YY=      | 61.8413      | ZY=               | 36.6998  |
| XZ=          | 22.3382     | YZ=      | 41.2333      | <td>119.5562</td> | 119.5562 |
| Eigenvalues: | 13.7232     | 46.7538  | 140.3024     |                   |          |
| 10 C         | Isotropic = | 20.5228  | Anisotropy = | 110.7497          |          |
| XX=          | -27.0563    | YX=      | 35.4312      | ZX=               | -1.0575  |
| XY=          | 45.8820     | YY=      | 2.9084       | ZY=               | 32.2104  |
| XZ=          | -9.7952     | YZ=      | 22.5539      | <td>85.7163</td>  | 85.7163  |
| Eigenvalues: | -58.2961    | 25.5085  | 94.3559      |                   |          |
| 11 C         | Isotropic = | 27.8182  | Anisotropy = | 133.8515          |          |
| XX=          | 16.8485     | YX=      | -11.2541     | ZX=               | 10.5669  |
| XY=          | -5.2239     | YY=      | -27.0129     | ZY=               | 59.4244  |
| XZ=          | 4.3964      | YZ=      | 56.3482      | <td>93.6190</td>  | 93.6190  |
| Eigenvalues: | -51.8828    | 18.2848  | 117.0525     |                   |          |
| 12 C         | Isotropic = | 72.4871  | Anisotropy = | 119.5428          |          |
| XX=          | 22.3685     | YX=      | 31.2852      | ZX=               | -4.3691  |
| XY=          | 44.5647     | YY=      | 53.4893      | ZY=               | 37.1174  |
| XZ=          | -5.4047     | YZ=      | 26.0948      | <td>141.6034</td> | 141.6034 |
| Eigenvalues: | -6.3805     | 71.6594  | 152.1823     |                   |          |
| 13 C         | Isotropic = | 41.0275  | Anisotropy = | 194.5028          |          |

|              |          |             |          |              |          |          |
|--------------|----------|-------------|----------|--------------|----------|----------|
| XX=          | -44.4743 | YX=         | -13.9156 | ZX=          | 20.3791  |          |
| XY=          | -16.4944 | YY=         | 26.6236  | ZY=          | 62.8626  |          |
| XZ=          | 28.3384  | YZ=         | 64.8653  | ZZ=          | 140.9331 |          |
| Eigenvalues: | -56.0911 |             | 8.4775   |              | 170.6960 |          |
| 14           | C        | Isotropic = | 80.2868  | Anisotropy = |          | 120.5515 |
| XX=          | 74.7159  | YX=         | 4.3288   | ZX=          | 5.5714   |          |
| XY=          | -10.5408 | YY=         | 26.3049  | ZY=          | 56.7892  |          |
| XZ=          | 3.4999   | YZ=         | 48.6482  | ZZ=          | 139.8396 |          |
| Eigenvalues: | 5.3026   |             | 74.9033  |              | 160.6545 |          |
| 15           | O        | Isotropic = | 206.6206 | Anisotropy = |          | 78.4849  |
| XX=          | 154.9574 | YX=         | 0.8563   | ZX=          | -0.6290  |          |
| XY=          | 13.3799  | YY=         | 207.8090 | ZY=          | 20.8542  |          |
| XZ=          | 27.8816  | YZ=         | -19.1512 | ZZ=          | 257.0955 |          |
| Eigenvalues: | 152.3009 |             | 208.6171 |              | 258.9439 |          |
| 16           | O        | Isotropic = | 185.7369 | Anisotropy = |          | 117.2450 |
| XX=          | 215.1326 | YX=         | -68.2205 | ZX=          | 33.8876  |          |
| XY=          | -48.5267 | YY=         | 158.4347 | ZY=          | 30.3941  |          |
| XZ=          | 32.5718  | YZ=         | -41.4141 | ZZ=          | 183.6436 |          |
| Eigenvalues: | 118.9629 |             | 174.3476 |              | 263.9003 |          |
| 17           | O        | Isotropic = | 257.9565 | Anisotropy = |          | 37.2536  |
| XX=          | 276.9986 | YX=         | 1.4966   | ZX=          | -18.8869 |          |
| XY=          | -4.4206  | YY=         | 250.4093 | ZY=          | -5.5752  |          |
| XZ=          | -9.7285  | YZ=         | -12.9464 | ZZ=          | 246.4616 |          |
| Eigenvalues: | 235.2505 |             | 255.8268 |              | 282.7922 |          |
| 18           | C        | Isotropic = | 163.9280 | Anisotropy = |          | 41.0912  |
| XX=          | 185.6671 | YX=         | 8.6297   | ZX=          | -11.9259 |          |
| XY=          | 11.5470  | YY=         | 158.6915 | ZY=          | -9.6948  |          |
| XZ=          | -3.8909  | YZ=         | -5.9306  | ZZ=          | 147.4255 |          |
| Eigenvalues: | 143.2526 |             | 157.2093 |              | 191.3221 |          |
| 19           | C        | Isotropic = | 167.4766 | Anisotropy = |          | 26.6892  |
| XX=          | 166.7426 | YX=         | 5.5783   | ZX=          | -9.6215  |          |
| XY=          | 8.8688   | YY=         | 170.0893 | ZY=          | -11.3767 |          |
| XZ=          | -8.6417  | YZ=         | -8.8934  | ZZ=          | 165.5979 |          |
| Eigenvalues: | 156.0713 |             | 161.0891 |              | 185.2694 |          |
| 20           | C        | Isotropic = | 65.0145  | Anisotropy = |          | 117.3084 |
| XX=          | 104.0677 | YX=         | -20.7698 | ZX=          | 34.2601  |          |
| XY=          | -16.5351 | YY=         | -7.9446  | ZY=          | 56.7643  |          |
| XZ=          | 40.1766  | YZ=         | 49.9464  | ZZ=          | 98.9206  |          |
| Eigenvalues: | -37.2684 |             | 89.0919  |              | 143.2202 |          |
| 21           | H        | Isotropic = | 30.0236  | Anisotropy = |          | 6.3580   |
| XX=          | 27.3535  | YX=         | -0.2164  | ZX=          | -1.2075  |          |
| XY=          | 0.4389   | YY=         | 29.3250  | ZY=          | -1.6584  |          |
| XZ=          | 0.0425   | YZ=         | -2.3483  | ZZ=          | 33.3923  |          |
| Eigenvalues: | 27.2932  |             | 28.5154  |              | 34.2623  |          |
| 22           | H        | Isotropic = | 30.1284  | Anisotropy = |          | 9.0901   |
| XX=          | 33.2345  | YX=         | -2.7438  | ZX=          | 3.9831   |          |
| XY=          | -2.3703  | YY=         | 29.9412  | ZY=          | -0.0815  |          |
| XZ=          | 4.1456   | YZ=         | -0.2747  | ZZ=          | 27.2096  |          |
| Eigenvalues: | 24.9428  |             | 29.2540  |              | 36.1885  |          |
| 23           | H        | Isotropic = | 30.4089  | Anisotropy = |          | 10.1689  |
| XX=          | 29.3352  | YX=         | 1.1362   | ZX=          | 4.6913   |          |
| XY=          | 1.1655   | YY=         | 30.7410  | ZY=          | 3.4986   |          |

|              |             |         |              |         |         |  |
|--------------|-------------|---------|--------------|---------|---------|--|
| XZ=          | 5.4384      | YZ=     | 3.3591       | ZZ=     | 31.1505 |  |
| Eigenvalues: | 24.7451     |         | 29.2935      |         | 37.1882 |  |
| 24 H         | Isotropic = | 30.3296 | Anisotropy = | 6.3467  |         |  |
| XX=          | 31.3385     | YX=     | 1.5895       | ZX=     | -2.2500 |  |
| XY=          | 1.2925      | YY=     | 33.1133      | ZY=     | -1.7079 |  |
| XZ=          | -1.5671     | YZ=     | -1.2907      | ZZ=     | 26.5370 |  |
| Eigenvalues: | 25.7411     |         | 30.6869      |         | 34.5607 |  |
| 25 H         | Isotropic = | 29.6194 | Anisotropy = | 2.4315  |         |  |
| XX=          | 29.9353     | YX=     | -1.6896      | ZX=     | -1.5958 |  |
| XY=          | 0.5572      | YY=     | 28.7097      | ZY=     | 0.2148  |  |
| XZ=          | 0.2604      | YZ=     | 1.7091       | ZZ=     | 30.2133 |  |
| Eigenvalues: | 28.2080     |         | 29.4098      |         | 31.2404 |  |
| 26 H         | Isotropic = | 28.7916 | Anisotropy = | 4.2432  |         |  |
| XX=          | 27.3202     | YX=     | 0.7437       | ZX=     | 0.7664  |  |
| XY=          | -1.2244     | YY=     | 29.4858      | ZY=     | -2.0150 |  |
| XZ=          | -0.8311     | YZ=     | -2.1606      | ZZ=     | 29.5687 |  |
| Eigenvalues: | 27.1734     |         | 27.5810      |         | 31.6203 |  |
| 27 H         | Isotropic = | 27.6603 | Anisotropy = | 4.7751  |         |  |
| XX=          | 26.6156     | YX=     | 0.7957       | ZX=     | -0.9759 |  |
| XY=          | -0.7539     | YY=     | 27.7269      | ZY=     | 0.9954  |  |
| XZ=          | -2.9050     | YZ=     | 3.0724       | ZZ=     | 28.6383 |  |
| Eigenvalues: | 24.9162     |         | 27.2211      |         | 30.8437 |  |
| 28 H         | Isotropic = | 30.2549 | Anisotropy = | 8.1778  |         |  |
| XX=          | 29.4529     | YX=     | 0.4793       | ZX=     | -2.3687 |  |
| XY=          | 0.7078      | YY=     | 32.7694      | ZY=     | -4.2320 |  |
| XZ=          | -2.2315     | YZ=     | -3.8645      | ZZ=     | 28.5426 |  |
| Eigenvalues: | 25.3638     |         | 29.6942      |         | 35.7068 |  |
| 29 H         | Isotropic = | 30.6075 | Anisotropy = | 9.5175  |         |  |
| XX=          | 33.2849     | YX=     | -3.6415      | ZX=     | 1.4875  |  |
| XY=          | -4.6778     | YY=     | 31.7260      | ZY=     | -0.6918 |  |
| XZ=          | 1.3915      | YZ=     | -0.4575      | ZZ=     | 26.8117 |  |
| Eigenvalues: | 26.4733     |         | 28.3967      |         | 36.9525 |  |
| 30 H         | Isotropic = | 30.4712 | Anisotropy = | 9.4376  |         |  |
| XX=          | 27.6666     | YX=     | -0.3145      | ZX=     | 0.5036  |  |
| XY=          | -0.1339     | YY=     | 34.0856      | ZY=     | 4.8458  |  |
| XZ=          | 0.4200      | YZ=     | 3.8744       | ZZ=     | 29.6615 |  |
| Eigenvalues: | 26.7112     |         | 27.9395      |         | 36.7630 |  |
| 31 H         | Isotropic = | 25.2315 | Anisotropy = | 6.8713  |         |  |
| XX=          | 27.2644     | YX=     | 2.4541       | ZX=     | -1.2333 |  |
| XY=          | 2.3527      | YY=     | 26.1115      | ZY=     | -2.0769 |  |
| XZ=          | -1.0075     | YZ=     | -2.1462      | ZZ=     | 22.3185 |  |
| Eigenvalues: | 21.3764     |         | 24.5057      |         | 29.8123 |  |
| 32 H         | Isotropic = | 25.3153 | Anisotropy = | 7.4536  |         |  |
| XX=          | 30.1873     | YX=     | 0.1289       | ZX=     | -0.7850 |  |
| XY=          | 0.6078      | YY=     | 24.0206      | ZY=     | -1.2092 |  |
| XZ=          | -0.6276     | YZ=     | -1.5733      | ZZ=     | 21.7381 |  |
| Eigenvalues: | 21.0542     |         | 24.6074      |         | 30.2844 |  |
| 33 H         | Isotropic = | 26.9913 | Anisotropy = | 18.3576 |         |  |
| XX=          | 34.0850     | YX=     | 4.1973       | ZX=     | 7.0000  |  |
| XY=          | 6.1018      | YY=     | 28.0012      | ZY=     | -0.3502 |  |
| XZ=          | 7.2408      | YZ=     | 2.0585       | ZZ=     | 18.8877 |  |
| Eigenvalues: | 15.9611     |         | 25.7831      |         | 39.2297 |  |

|              |         |             |         |              |         |
|--------------|---------|-------------|---------|--------------|---------|
| 34           | H       | Isotropic = | 30.7097 | Anisotropy = | 15.0872 |
| XX=          | 24.8069 | YX=         | -0.4457 | ZX=          | -3.8292 |
| XY=          | -0.2063 | YY=         | 39.0388 | ZY=          | -4.1776 |
| XZ=          | -5.3409 | YZ=         | -4.7812 | ZZ=          | 28.2835 |
| Eigenvalues: | 21.1672 |             | 30.1941 |              | 40.7679 |
| 35           | H       | Isotropic = | 29.6353 | Anisotropy = | 8.0410  |
| XX=          | 33.2546 | YX=         | -3.1479 | ZX=          | -2.2043 |
| XY=          | -1.2694 | YY=         | 30.1109 | ZY=          | -0.2902 |
| XZ=          | -3.1874 | YZ=         | 0.0860  | ZZ=          | 25.5403 |
| Eigenvalues: | 24.5777 |             | 29.3322 |              | 34.9959 |
| 36           | H       | Isotropic = | 29.3095 | Anisotropy = | 9.0928  |
| XX=          | 31.1748 | YX=         | 3.1075  | ZX=          | 2.4320  |
| XY=          | 3.5306  | YY=         | 28.6783 | ZY=          | 1.8339  |
| XZ=          | 3.6383  | YZ=         | 2.4756  | ZZ=          | 28.0755 |
| Eigenvalues: | 26.1694 |             | 26.3878 |              | 35.3714 |
| 37           | H       | Isotropic = | 29.6902 | Anisotropy = | 7.7695  |
| XX=          | 30.4090 | YX=         | 2.1074  | ZX=          | -2.2219 |
| XY=          | 0.0456  | YY=         | 29.4115 | ZY=          | -4.4027 |
| XZ=          | -1.3926 | YZ=         | -4.8064 | ZZ=          | 29.2501 |
| Eigenvalues: | 24.6715 |             | 29.5292 |              | 34.8698 |
| 38           | H       | Isotropic = | 29.8485 | Anisotropy = | 8.0225  |
| XX=          | 33.5019 | YX=         | 2.1474  | ZX=          | 1.5922  |
| XY=          | 2.9860  | YY=         | 30.7018 | ZY=          | -0.9697 |
| XZ=          | 2.1710  | YZ=         | -0.3818 | ZZ=          | 25.3418 |
| Eigenvalues: | 24.6595 |             | 29.6891 |              | 35.1969 |
| 39           | H       | Isotropic = | 29.9295 | Anisotropy = | 4.7387  |
| XX=          | 26.7597 | YX=         | 0.2734  | ZX=          | -1.8001 |
| XY=          | 1.0422  | YY=         | 30.7295 | ZY=          | -1.2158 |
| XZ=          | -2.1152 | YZ=         | 0.3247  | ZZ=          | 32.2992 |
| Eigenvalues: | 26.0849 |             | 30.6148 |              | 33.0886 |
| 40           | H       | Isotropic = | 29.9227 | Anisotropy = | 8.3919  |
| XX=          | 28.3104 | YX=         | -0.4337 | ZX=          | -0.9229 |
| XY=          | -1.6745 | YY=         | 34.8743 | ZY=          | -1.6840 |
| XZ=          | -0.2589 | YZ=         | -2.6569 | ZZ=          | 26.5834 |
| Eigenvalues: | 25.7722 |             | 28.4786 |              | 35.5173 |
| 41           | H       | Isotropic = | 26.5934 | Anisotropy = | 5.7181  |
| XX=          | 27.8785 | YX=         | -3.1918 | ZX=          | -1.0575 |
| XY=          | -0.3780 | YY=         | 26.4357 | ZY=          | 1.6026  |
| XZ=          | -1.1838 | YZ=         | 3.7525  | ZZ=          | 25.4660 |
| Eigenvalues: | 23.2090 |             | 26.1658 |              | 30.4055 |
| 42           | H       | Isotropic = | 26.6391 | Anisotropy = | 7.1404  |
| XX=          | 27.1702 | YX=         | -0.4145 | ZX=          | -1.3112 |
| XY=          | -2.5527 | YY=         | 25.6202 | ZY=          | 4.3022  |
| XZ=          | -0.5548 | YZ=         | 4.2919  | ZZ=          | 27.1270 |
| Eigenvalues: | 21.9524 |             | 26.5656 |              | 31.3994 |

Number of frequencies: 120

harmonic frequencies in  $\text{cm}^{-1}$ , reduced masses in amu,

force constants in mDyne/A, and

normal modes in cartesian coordinates: 120

IR intensities in  $\text{km/mol}$

|             |        |        |        |        |        |        |
|-------------|--------|--------|--------|--------|--------|--------|
| vibration # | 1      | 2      | 3      | 4      | 5      | 6      |
| -----       |        |        |        |        |        |        |
| frequencies | 52.20  | 74.52  | 92.18  | 98.08  | 126.83 | 155.44 |
| intensities | 0.21   | 1.49   | 0.14   | 0.76   | 5.74   | 0.71   |
| reduc. mass | 1.21   | 0.86   | 1.07   | 1.16   | 0.24   | 0.60   |
| force const | 0.00   | 0.00   | 0.01   | 0.01   | 0.00   | 0.01   |
|             |        |        |        |        |        |        |
| vibration # | 7      | 8      | 9      | 10     | 11     | 12     |
| -----       |        |        |        |        |        |        |
| frequencies | 171.61 | 200.65 | 219.31 | 237.34 | 249.02 | 255.54 |
| intensities | 0.89   | 2.67   | 0.76   | 0.26   | 10.13  | 2.88   |
| reduc. mass | 1.11   | 0.77   | 1.16   | 0.64   | 1.13   | 1.37   |
| force const | 0.02   | 0.02   | 0.03   | 0.02   | 0.04   | 0.05   |
|             |        |        |        |        |        |        |
| vibration # | 13     | 14     | 15     | 16     | 17     | 18     |
| -----       |        |        |        |        |        |        |
| frequencies | 271.90 | 280.74 | 303.90 | 318.21 | 329.60 | 331.83 |
| intensities | 2.62   | 0.33   | 2.45   | 1.52   | 1.10   | 1.56   |
| reduc. mass | 0.73   | 0.23   | 2.26   | 0.39   | 1.44   | 0.25   |
| force const | 0.03   | 0.01   | 0.12   | 0.02   | 0.09   | 0.02   |
|             |        |        |        |        |        |        |
| vibration # | 19     | 20     | 21     | 22     | 23     | 24     |
| -----       |        |        |        |        |        |        |



|             |        |        |        |        |        |        |
|-------------|--------|--------|--------|--------|--------|--------|
| frequencies | 362.04 | 424.78 | 433.82 | 444.54 | 480.01 | 491.50 |
| intensities | 1.73   | 11.92  | 6.59   | 16.79  | 7.22   | 3.02   |
| reduc. mass | 0.55   | 0.61   | 0.34   | 0.85   | 0.60   | 1.15   |
| force const | 0.04   | 0.07   | 0.04   | 0.10   | 0.08   | 0.16   |

vibration #      25    26    27    28    29    30

-----

|             |        |        |        |        |        |        |
|-------------|--------|--------|--------|--------|--------|--------|
| frequencies | 521.04 | 524.85 | 537.26 | 545.25 | 566.74 | 606.24 |
| intensities | 2.89   | 10.20  | 1.38   | 3.07   | 32.72  | 21.51  |
| reduc. mass | 0.53   | 1.64   | 0.75   | 0.64   | 0.51   | 2.03   |
| force const | 0.09   | 0.27   | 0.13   | 0.11   | 0.10   | 0.44   |

vibration #      31    32    33    34    35    36

-----

|             |        |        |        |        |        |        |
|-------------|--------|--------|--------|--------|--------|--------|
| frequencies | 633.33 | 667.43 | 684.24 | 713.86 | 714.97 | 736.06 |
| intensities | 88.59  | 9.35   | 4.89   | 2.96   | 15.71  | 1.44   |
| reduc. mass | 0.66   | 0.83   | 1.24   | 1.04   | 0.46   | 0.55   |
| force const | 0.16   | 0.22   | 0.34   | 0.31   | 0.14   | 0.18   |

vibration #      37    38    39    40    41    42

-----

|             |        |        |        |        |        |        |
|-------------|--------|--------|--------|--------|--------|--------|
| frequencies | 748.38 | 798.56 | 810.69 | 834.26 | 869.61 | 926.08 |
| intensities | 4.52   | 4.32   | 4.13   | 2.15   | 10.32  | 4.96   |
| reduc. mass | 1.46   | 0.51   | 0.91   | 2.73   | 0.58   | 0.73   |
| force const | 0.48   | 0.19   | 0.35   | 1.12   | 0.26   | 0.37   |

vibration #      43    44    45    46    47    48

-----

|             |        |        |        |         |         |         |
|-------------|--------|--------|--------|---------|---------|---------|
| frequencies | 928.84 | 937.68 | 964.15 | 1006.26 | 1012.77 | 1016.92 |
|-------------|--------|--------|--------|---------|---------|---------|

|             |      |       |      |      |      |      |
|-------------|------|-------|------|------|------|------|
| intensities | 4.80 | 11.76 | 6.28 | 6.11 | 7.18 | 2.68 |
| reduc. mass | 0.66 | 1.50  | 0.30 | 0.29 | 0.29 | 0.32 |
| force const | 0.34 | 0.78  | 0.16 | 0.18 | 0.17 | 0.20 |

vibration #      49    50    51    52    53    54

-----

|             |         |         |         |         |         |         |
|-------------|---------|---------|---------|---------|---------|---------|
| frequencies | 1032.07 | 1047.06 | 1057.36 | 1059.76 | 1068.80 | 1093.03 |
| intensities | 15.84   | 22.38   | 7.06    | 6.67    | 21.83   | 19.42   |
| reduc. mass | 0.39    | 0.32    | 0.35    | 0.31    | 0.29    | 0.60    |
| force const | 0.24    | 0.21    | 0.23    | 0.21    | 0.19    | 0.42    |

vibration #      55    56    57    58    59    60

-----

|             |         |         |         |         |         |         |
|-------------|---------|---------|---------|---------|---------|---------|
| frequencies | 1103.34 | 1115.84 | 1128.89 | 1153.73 | 1170.69 | 1223.43 |
| intensities | 60.14   | 32.98   | 22.25   | 47.17   | 23.54   | 21.45   |
| reduc. mass | 0.64    | 0.36    | 0.43    | 0.92    | 0.56    | 0.32    |
| force const | 0.46    | 0.27    | 0.32    | 0.72    | 0.45    | 0.28    |

vibration #      61    62    63    64    65    66

-----

|             |         |         |         |         |         |         |
|-------------|---------|---------|---------|---------|---------|---------|
| frequencies | 1227.09 | 1253.14 | 1255.40 | 1282.18 | 1315.40 | 1330.93 |
| intensities | 31.61   | 106.28  | 11.94   | 49.90   | 106.91  | 21.82   |
| reduc. mass | 0.56    | 0.91    | 0.25    | 0.98    | 0.27    | 0.61    |
| force const | 0.49    | 0.84    | 0.23    | 0.95    | 0.27    | 0.63    |

vibration #      67    68    69    70    71    72

-----

|             |         |         |         |         |         |         |
|-------------|---------|---------|---------|---------|---------|---------|
| frequencies | 1341.65 | 1387.42 | 1397.76 | 1409.27 | 1414.80 | 1473.20 |
| intensities | 77.48   | 102.56  | 86.64   | 201.81  | 286.83  | 14.12   |

|             |      |      |      |      |      |      |
|-------------|------|------|------|------|------|------|
| reduc. mass | 0.79 | 0.61 | 0.96 | 0.37 | 0.58 | 1.42 |
| force const | 0.83 | 0.69 | 1.10 | 0.43 | 0.69 | 1.81 |

vibration #      73    74    75    76    77    78

-----

|             |         |         |         |         |         |         |
|-------------|---------|---------|---------|---------|---------|---------|
| frequencies | 1488.34 | 1497.22 | 1510.76 | 1522.43 | 1534.46 | 1539.04 |
| intensities | 10.22   | 5.22    | 156.19  | 25.14   | 69.66   | 6.48    |
| reduc. mass | 0.72    | 0.83    | 1.26    | 1.91    | 0.60    | 0.47    |
| force const | 0.94    | 1.10    | 1.69    | 2.61    | 0.83    | 0.66    |

vibration #      79    80    81    82    83    84

-----

|             |         |         |         |         |         |         |
|-------------|---------|---------|---------|---------|---------|---------|
| frequencies | 1569.21 | 1577.68 | 1591.45 | 1627.25 | 1636.54 | 1646.76 |
| intensities | 46.96   | 28.73   | 33.69   | 9.67    | 81.98   | 93.60   |
| reduc. mass | 0.54    | 0.54    | 0.39    | 0.42    | 0.23    | 0.34    |
| force const | 0.78    | 0.79    | 0.58    | 0.65    | 0.36    | 0.54    |

vibration #      85    86    87    88    89    90

-----

|             |         |         |         |         |         |         |
|-------------|---------|---------|---------|---------|---------|---------|
| frequencies | 1651.94 | 1655.05 | 1659.30 | 1659.90 | 1662.60 | 1662.93 |
| intensities | 16.88   | 32.36   | 8.45    | 21.99   | 20.91   | 21.60   |
| reduc. mass | 0.58    | 0.23    | 0.24    | 0.29    | 0.36    | 0.23    |
| force const | 0.94    | 0.37    | 0.39    | 0.46    | 0.59    | 0.38    |

vibration #      91    92    93    94    95    96

-----

|             |         |         |         |         |         |         |
|-------------|---------|---------|---------|---------|---------|---------|
| frequencies | 1677.25 | 1679.80 | 1684.74 | 1687.04 | 1728.44 | 1798.34 |
| intensities | 4.15    | 26.01   | 5.26    | 137.31  | 32.60   | 738.62  |
| reduc. mass | 0.34    | 0.24    | 0.28    | 0.79    | 1.06    | 1.56    |

force const 0.56 0.40 0.47 1.33 1.87 2.97

vibration # 97 98 99 100 101 102

-----

frequencies 1831.30 1891.41 3023.27 3028.03 3033.54 3051.15

intensities 392.93 11.79 405.72 624.97 370.87 493.84

reduc. mass 1.37 0.87 0.31 0.16 0.15 0.45

force const 2.71 1.84 1.68 0.89 0.81 2.48

vibration # 103 104 105 106 107 108

-----

frequencies 3060.39 3074.22 3082.44 3089.45 3092.82 3120.06

intensities 452.84 363.73 220.85 108.50 409.94 206.64

reduc. mass 0.41 0.88 0.56 0.54 0.46 0.39

force const 2.25 4.91 3.14 3.05 2.59 2.24

vibration # 109 110 111 112 113 114

-----

frequencies 3124.12 3132.33 3134.93 3143.39 3145.37 3146.46

intensities 732.16 352.14 470.68 482.73 388.19 91.11

reduc. mass 0.36 0.42 0.47 0.44 0.40 0.41

force const 2.09 2.44 2.70 2.54 2.36 2.40

vibration # 115 116 117 118 119 120

-----

frequencies 3152.39 3156.40 3172.19 3196.95 3839.06 3866.28

intensities 395.61 307.86 436.17 267.52 50.47 76.02

reduc. mass 0.71 0.37 0.58 0.55 0.94 0.94

force const 4.16 2.18 3.46 3.33 8.20 8.32

Number of imaginary frequencies: 0

#### Conformation 4

Boltzmann Population = 19.2% (relative energy = 0.46 kcal/mol)

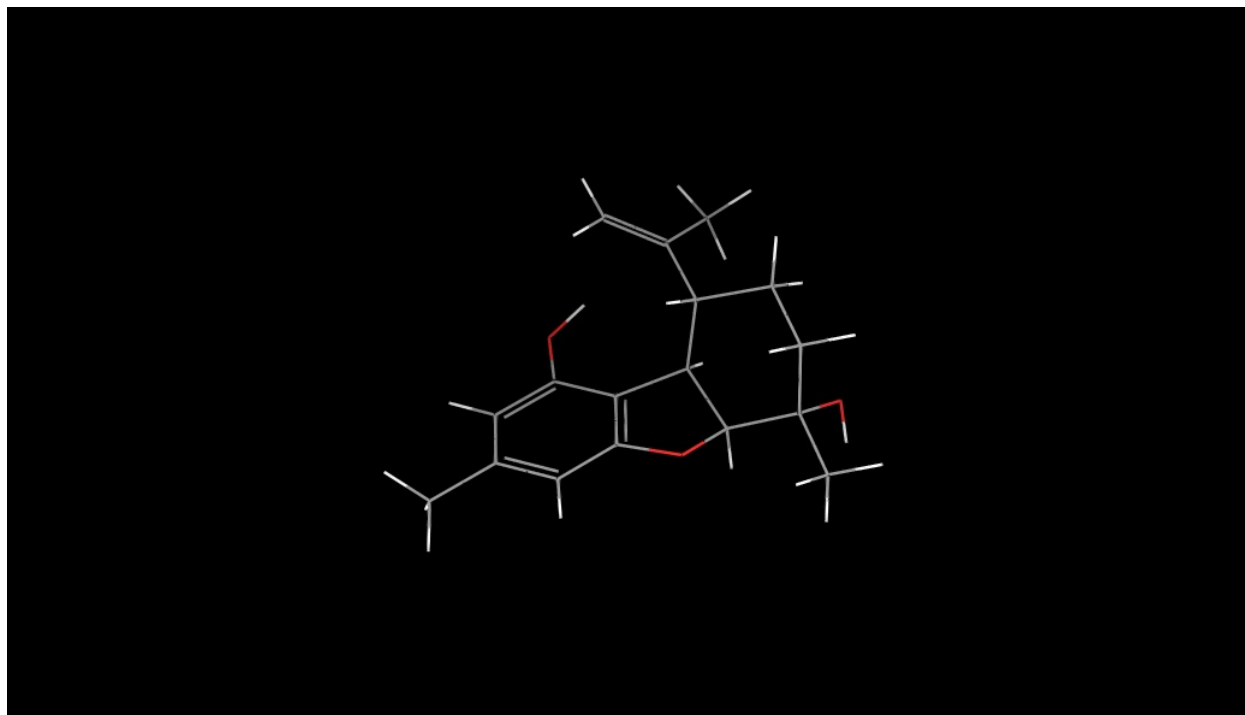

Geometries and Energy Method: M06-2X-D3/6-31G(d,p)

NMR Method: mPW1PW91/6-311+G(2d,p)

Thermodynamic properties for P = 1.00 atm, calculated at 1 temperatures

T = 298.15 K, P = 1.00 atm

Total internal energy, Utot(SCFE + ZPE + U): -885.980672 hartrees

Total enthalpy, Htot (Utot + pV): -885.979728 hartrees

Total Gibbs free energy, Gtot (Htot - T\*S): -886.042557 hartrees

Optimized Geometry:

| Center<br>Number | Atomic<br>Number | Atomic<br>Type | Coordinates (Angstroms) |           |           |
|------------------|------------------|----------------|-------------------------|-----------|-----------|
|                  |                  |                | X                       | Y         | Z         |
| 1                | 6                | 0              | -6.019200               | -0.576900 | -2.688800 |
| 2                | 6                | 0              | -4.552000               | -0.288400 | -2.995700 |
| 3                | 6                | 0              | -3.842700               | -1.568500 | -3.454100 |
| 4                | 6                | 0              | -3.950000               | -2.700900 | -2.394600 |
| 5                | 6                | 0              | -5.370500               | -2.847400 | -1.805900 |

|    |   |   |           |           |           |
|----|---|---|-----------|-----------|-----------|
| 6  | 6 | 0 | -6.146000 | -1.558700 | -1.527600 |
| 7  | 6 | 0 | -7.603200 | -1.868400 | -1.207500 |
| 8  | 6 | 0 | -2.392600 | -1.335000 | -3.824900 |
| 9  | 6 | 0 | -3.837800 | -4.065900 | -3.046100 |
| 10 | 6 | 0 | -5.136600 | -4.533600 | -3.253300 |
| 11 | 6 | 0 | -2.775300 | -4.835800 | -3.504500 |
| 12 | 6 | 0 | -3.043600 | -6.056000 | -4.138000 |
| 13 | 6 | 0 | -4.349300 | -6.498500 | -4.334800 |
| 14 | 6 | 0 | -5.429600 | -5.723300 | -3.890100 |
| 15 | 8 | 0 | -1.472600 | -4.479600 | -3.346800 |
| 16 | 8 | 0 | -6.078100 | -3.681400 | -2.737600 |
| 17 | 8 | 0 | -5.511900 | -0.923400 | -0.419000 |
| 18 | 6 | 0 | -4.611500 | -7.827900 | -4.997400 |
| 19 | 6 | 0 | -1.555800 | -0.519900 | -2.870700 |
| 20 | 6 | 0 | -1.878600 | -1.844600 | -4.948300 |
| 21 | 1 | 0 | -6.515800 | -1.007300 | -3.566600 |
| 22 | 1 | 0 | -6.549400 | 0.341300  | -2.416800 |
| 23 | 1 | 0 | -4.466900 | 0.469900  | -3.781800 |
| 24 | 1 | 0 | -4.077600 | 0.114300  | -2.094700 |
| 25 | 1 | 0 | -4.364200 | -1.931000 | -4.349700 |
| 26 | 1 | 0 | -3.231500 | -2.531900 | -1.585300 |
| 27 | 1 | 0 | -5.294300 | -3.410900 | -0.860000 |
| 28 | 1 | 0 | -8.122100 | -0.945000 | -0.937600 |
| 29 | 1 | 0 | -8.099400 | -2.329600 | -2.063400 |
| 30 | 1 | 0 | -7.672100 | -2.567600 | -0.365600 |
| 31 | 1 | 0 | -2.199900 | -6.644800 | -4.482600 |
| 32 | 1 | 0 | -6.456200 | -6.047000 | -4.021500 |
| 33 | 1 | 0 | -1.425000 | -3.514400 | -3.303200 |
| 34 | 1 | 0 | -5.688600 | -1.452600 | 0.368200  |
| 35 | 1 | 0 | -3.757000 | -8.147500 | -5.597400 |
| 36 | 1 | 0 | -4.802200 | -8.603200 | -4.248100 |
| 37 | 1 | 0 | -5.488900 | -7.777300 | -5.647400 |
| 38 | 1 | 0 | -0.498400 | -0.558800 | -3.140900 |
| 39 | 1 | 0 | -1.871100 | 0.528600  | -2.880100 |
| 40 | 1 | 0 | -1.663300 | -0.869200 | -1.837500 |
| 41 | 1 | 0 | -0.834700 | -1.701300 | -5.213400 |
| 42 | 1 | 0 | -2.489400 | -2.424100 | -5.634800 |

-----

SCF GIAO Magnetic shielding tensor (ppm):

|              |          |             |          |              |          |
|--------------|----------|-------------|----------|--------------|----------|
| 1            | C        | Isotropic = | 152.3848 | Anisotropy = | 19.8564  |
| XX=          | 145.8604 | YX=         | 0.5803   | ZX=          | 2.3797   |
| XY=          | -4.6647  | YY=         | 160.2744 | ZY=          | 7.8815   |
| XZ=          | -3.2012  | YZ=         | 9.3508   | ZZ=          | 151.0195 |
| Eigenvalues: | 145.0664 | 146.4655    | 165.6224 |              |          |
| 2            | C        | Isotropic = | 161.1949 | Anisotropy = | 14.8822  |
| XX=          | 164.7129 | YX=         | -5.2878  | ZX=          | 6.9486   |
| XY=          | -4.0307  | YY=         | 163.4494 | ZY=          | 0.1742   |
| XZ=          | 8.0999   | YZ=         | -0.0523  | ZZ=          | 155.4225 |

|              |             |          |              |          |          |
|--------------|-------------|----------|--------------|----------|----------|
| Eigenvalues: | 150.7670    | 161.7014 | 171.1164     |          |          |
| 3 C          | Isotropic = | 133.6351 | Anisotropy = | 14.5021  |          |
| XX=          | 135.9300    | YX=      | -1.4353      | ZX=      | 2.2125   |
| XY=          | 6.1692      | YY=      | 138.7770     | ZY=      | -6.7507  |
| XZ=          | 0.3789      | YZ=      | -10.0267     | ZZ=      | 126.1983 |
| Eigenvalues: | 121.6559    | 135.9463 | 143.3032     |          |          |
| 4 C          | Isotropic = | 141.6103 | Anisotropy = | 19.5890  |          |
| XX=          | 147.8333    | YX=      | -0.6747      | ZX=      | 1.8607   |
| XY=          | 0.6048      | YY=      | 148.2770     | ZY=      | 0.9924   |
| XZ=          | 6.6297      | YZ=      | 23.4665      | ZZ=      | 128.7208 |
| Eigenvalues: | 122.2617    | 147.8997 | 154.6697     |          |          |
| 5 C          | Isotropic = | 94.0520  | Anisotropy = | 57.1193  |          |
| XX=          | 117.9421    | YX=      | 8.5270       | ZX=      | -23.8901 |
| XY=          | -1.5511     | YY=      | 85.8668      | ZY=      | -18.2042 |
| XZ=          | -26.5092    | YZ=      | -9.9077      | ZZ=      | 78.3472  |
| Eigenvalues: | 60.8910     | 89.1336  | 132.1316     |          |          |
| 6 C          | Isotropic = | 116.4166 | Anisotropy = | 53.5649  |          |
| XX=          | 120.0185    | YX=      | 10.0741      | ZX=      | -27.0665 |
| XY=          | 7.5012      | YY=      | 108.2799     | ZY=      | -11.6657 |
| XZ=          | -25.3344    | YZ=      | -14.2883     | ZZ=      | 120.9516 |
| Eigenvalues: | 93.5059     | 103.6174 | 152.1266     |          |          |
| 7 C          | Isotropic = | 157.4143 | Anisotropy = | 45.5850  |          |
| XX=          | 140.6445    | YX=      | -7.7918      | ZX=      | 0.0343   |
| XY=          | -4.1282     | YY=      | 186.9140     | ZY=      | -2.6842  |
| XZ=          | -0.2042     | YZ=      | -2.1992      | ZZ=      | 144.6844 |
| Eigenvalues: | 139.8566    | 144.5820 | 187.8043     |          |          |
| 8 C          | Isotropic = | 27.5435  | Anisotropy = | 193.8710 |          |
| XX=          | 60.9597     | YX=      | -8.2142      | ZX=      | 79.4739  |
| XY=          | -15.1757    | YY=      | -51.1750     | ZY=      | 66.5810  |
| XZ=          | 82.0523     | YZ=      | 67.6733      | ZZ=      | 72.8459  |
| Eigenvalues: | -94.6963    | 20.5361  | 156.7909     |          |          |
| 9 C          | Isotropic = | 66.6266  | Anisotropy = | 112.4407 |          |
| XX=          | 19.6435     | YX=      | 2.5725       | ZX=      | 9.3383   |
| XY=          | -12.7100    | YY=      | 59.3641      | ZY=      | 37.1795  |
| XZ=          | 22.2777     | YZ=      | 42.3856      | ZZ=      | 120.8724 |
| Eigenvalues: | 13.4840     | 44.8088  | 141.5871     |          |          |
| 10 C         | Isotropic = | 20.6233  | Anisotropy = | 109.6389 |          |
| XX=          | -26.4034    | YX=      | 36.5012      | ZX=      | -0.9288  |
| XY=          | 46.9373     | YY=      | 2.4386       | ZY=      | 30.5838  |
| XZ=          | -9.5518     | YZ=      | 21.5381      | ZZ=      | 85.8347  |
| Eigenvalues: | -58.7902    | 26.9442  | 93.7159      |          |          |
| 11 C         | Isotropic = | 27.5446  | Anisotropy = | 134.3470 |          |
| XX=          | 15.8462     | YX=      | -11.8181     | ZX=      | 10.8569  |
| XY=          | -6.2324     | YY=      | -28.0563     | ZY=      | 58.1134  |
| XZ=          | 5.3495      | YZ=      | 55.0567      | ZZ=      | 94.8438  |
| Eigenvalues: | -52.0424    | 17.5669  | 117.1093     |          |          |
| 12 C         | Isotropic = | 72.1812  | Anisotropy = | 117.5898 |          |
| XX=          | 23.3311     | YX=      | 32.8893      | ZX=      | -4.4604  |
| XY=          | 45.0064     | YY=      | 52.3920      | ZY=      | 35.4381  |
| XZ=          | -4.3017     | YZ=      | 24.8070      | ZZ=      | 140.8204 |
| Eigenvalues: | -6.7522     | 72.7214  | 150.5744     |          |          |
| 13 C         | Isotropic = | 41.4940  | Anisotropy = | 193.8040 |          |



|              |          |             |          |              |          |          |
|--------------|----------|-------------|----------|--------------|----------|----------|
| XX=          | -44.1851 | YX=         | -13.8042 | ZX=          | 20.6092  |          |
| XY=          | -16.6704 | YY=         | 26.0068  | ZY=          | 61.0018  |          |
| XZ=          | 28.2230  | YZ=         | 62.9244  | ZZ=          | 142.6604 |          |
| Eigenvalues: | -55.5950 |             | 9.3804   |              | 170.6967 |          |
| 14           | C        | Isotropic = | 80.7343  | Anisotropy = |          | 121.6919 |
| XX=          | 74.4997  | YX=         | 4.1102   | ZX=          | 5.9979   |          |
| XY=          | -11.3247 | YY=         | 25.5492  | ZY=          | 55.5907  |          |
| XZ=          | 4.5810   | YZ=         | 47.6074  | ZZ=          | 142.1538 |          |
| Eigenvalues: | 5.5950   |             | 74.7456  |              | 161.8622 |          |
| 15           | O        | Isotropic = | 205.5088 | Anisotropy = |          | 79.9187  |
| XX=          | 153.0886 | YX=         | 1.4577   | ZX=          | -0.7765  |          |
| XY=          | 13.4748  | YY=         | 206.5544 | ZY=          | 21.2381  |          |
| XZ=          | 28.6754  | YZ=         | -19.5835 | ZZ=          | 256.8834 |          |
| Eigenvalues: | 150.3004 |             | 207.4381 |              | 258.7879 |          |
| 16           | O        | Isotropic = | 184.6663 | Anisotropy = |          | 112.6464 |
| XX=          | 211.9105 | YX=         | -66.6260 | ZX=          | 31.8326  |          |
| XY=          | -46.9588 | YY=         | 157.2183 | ZY=          | 29.4496  |          |
| XZ=          | 31.5013  | YZ=         | -41.3627 | ZZ=          | 184.8702 |          |
| Eigenvalues: | 119.1577 |             | 175.0774 |              | 259.7640 |          |
| 17           | O        | Isotropic = | 245.8725 | Anisotropy = |          | 64.3757  |
| XX=          | 227.4565 | YX=         | 9.5526   | ZX=          | -3.8651  |          |
| XY=          | 11.6551  | YY=         | 225.8607 | ZY=          | 18.9320  |          |
| XZ=          | -19.4561 | YZ=         | 8.6666   | ZZ=          | 284.3001 |          |
| Eigenvalues: | 211.5465 |             | 237.2813 |              | 288.7896 |          |
| 18           | C        | Isotropic = | 163.9719 | Anisotropy = |          | 41.1169  |
| XX=          | 186.7583 | YX=         | 6.7674   | ZX=          | -10.6649 |          |
| XY=          | 11.6816  | YY=         | 157.9768 | ZY=          | -8.9597  |          |
| XZ=          | -4.1787  | YZ=         | -5.4624  | ZZ=          | 147.1806 |          |
| Eigenvalues: | 143.3964 |             | 157.1362 |              | 191.3832 |          |
| 19           | C        | Isotropic = | 167.3358 | Anisotropy = |          | 26.9759  |
| XX=          | 166.7634 | YX=         | 5.4662   | ZX=          | -9.9308  |          |
| XY=          | 8.6748   | YY=         | 169.5252 | ZY=          | -11.6307 |          |
| XZ=          | -8.7313  | YZ=         | -9.2092  | ZZ=          | 165.7187 |          |
| Eigenvalues: | 155.7096 |             | 160.9780 |              | 185.3197 |          |
| 20           | C        | Isotropic = | 66.3044  | Anisotropy = |          | 115.0753 |
| XX=          | 105.7215 | YX=         | -21.6705 | ZX=          | 34.2705  |          |
| XY=          | -17.4200 | YY=         | -4.1907  | ZY=          | 57.4724  |          |
| XZ=          | 39.7991  | YZ=         | 51.0406  | ZZ=          | 97.3825  |          |
| Eigenvalues: | -35.5190 |             | 91.4110  |              | 143.0213 |          |
| 21           | H        | Isotropic = | 30.1641  | Anisotropy = |          | 6.3247   |
| XX=          | 27.6264  | YX=         | -0.2627  | ZX=          | -1.1930  |          |
| XY=          | 0.5833   | YY=         | 29.4411  | ZY=          | -1.9290  |          |
| XZ=          | 0.1081   | YZ=         | -2.2893  | ZZ=          | 33.4247  |          |
| Eigenvalues: | 27.5750  |             | 28.5367  |              | 34.3805  |          |
| 22           | H        | Isotropic = | 30.0538  | Anisotropy = |          | 9.0349   |
| XX=          | 33.1489  | YX=         | -2.6668  | ZX=          | 3.9668   |          |
| XY=          | -2.4187  | YY=         | 29.7591  | ZY=          | -0.0311  |          |
| XZ=          | 4.1123   | YZ=         | -0.2639  | ZZ=          | 27.2533  |          |
| Eigenvalues: | 24.9566  |             | 29.1277  |              | 36.0771  |          |
| 23           | H        | Isotropic = | 30.6234  | Anisotropy = |          | 10.0343  |
| XX=          | 29.6998  | YX=         | 1.1151   | ZX=          | 4.6790   |          |
| XY=          | 1.2237   | YY=         | 31.2352  | ZY=          | 3.5844   |          |

|              |             |         |              |         |         |  |  |
|--------------|-------------|---------|--------------|---------|---------|--|--|
| XZ=          | 5.4880      | YZ=     | 3.2436       | ZZ=     | 30.9352 |  |  |
| Eigenvalues: | 24.8365     |         | 29.7208      |         | 37.3129 |  |  |
| 24 H         | Isotropic = | 29.6088 | Anisotropy = | 6.0288  |         |  |  |
| XX=          | 30.2345     | YX=     | 1.2562       | ZX=     | -2.6697 |  |  |
| XY=          | 1.0162      | YY=     | 32.3528      | ZY=     | -1.5675 |  |  |
| XZ=          | -2.0746     | YZ=     | -1.3728      | ZZ=     | 26.2390 |  |  |
| Eigenvalues: | 25.0297     |         | 30.1686      |         | 33.6280 |  |  |
| 25 H         | Isotropic = | 29.6178 | Anisotropy = | 2.5137  |         |  |  |
| XX=          | 29.8844     | YX=     | -1.7320      | ZX=     | -1.4498 |  |  |
| XY=          | 0.3618      | YY=     | 28.7652      | ZY=     | 0.3148  |  |  |
| XZ=          | 0.3055      | YZ=     | 1.8730       | ZZ=     | 30.2038 |  |  |
| Eigenvalues: | 28.1032     |         | 29.4565      |         | 31.2936 |  |  |
| 26 H         | Isotropic = | 28.4948 | Anisotropy = | 4.2942  |         |  |  |
| XX=          | 26.8472     | YX=     | 0.8322       | ZX=     | 0.5171  |  |  |
| XY=          | -1.1658     | YY=     | 29.3318      | ZY=     | -1.9666 |  |  |
| XZ=          | -0.9093     | YZ=     | -2.1111      | ZZ=     | 29.3055 |  |  |
| Eigenvalues: | 26.7277     |         | 27.3991      |         | 31.3576 |  |  |
| 27 H         | Isotropic = | 27.9528 | Anisotropy = | 4.8159  |         |  |  |
| XX=          | 26.9462     | YX=     | 0.7631       | ZX=     | -1.1700 |  |  |
| XY=          | -0.6404     | YY=     | 28.0307      | ZY=     | 0.9144  |  |  |
| XZ=          | -3.1686     | YZ=     | 2.9707       | ZZ=     | 28.8815 |  |  |
| Eigenvalues: | 25.0463     |         | 27.6487      |         | 31.1634 |  |  |
| 28 H         | Isotropic = | 30.5405 | Anisotropy = | 9.1048  |         |  |  |
| XX=          | 32.8196     | YX=     | -3.4016      | ZX=     | 1.4953  |  |  |
| XY=          | -4.7282     | YY=     | 31.7311      | ZY=     | -0.6189 |  |  |
| XZ=          | 1.5757      | YZ=     | -0.3971      | ZZ=     | 27.0708 |  |  |
| Eigenvalues: | 26.5937     |         | 28.4174      |         | 36.6104 |  |  |
| 29 H         | Isotropic = | 29.9476 | Anisotropy = | 8.4542  |         |  |  |
| XX=          | 29.0352     | YX=     | 0.4715       | ZX=     | -2.2881 |  |  |
| XY=          | 0.9670      | YY=     | 32.6565      | ZY=     | -4.4169 |  |  |
| XZ=          | -2.2151     | YZ=     | -3.7983      | ZZ=     | 28.1510 |  |  |
| Eigenvalues: | 25.0477     |         | 29.2113      |         | 35.5837 |  |  |
| 30 H         | Isotropic = | 30.8590 | Anisotropy = | 8.9699  |         |  |  |
| XX=          | 28.3715     | YX=     | -0.2809      | ZX=     | 0.3030  |  |  |
| XY=          | -0.1296     | YY=     | 34.5500      | ZY=     | 4.6483  |  |  |
| XZ=          | 0.2689      | YZ=     | 3.4611       | ZZ=     | 29.6554 |  |  |
| Eigenvalues: | 27.2569     |         | 28.4812      |         | 36.8389 |  |  |
| 31 H         | Isotropic = | 25.2416 | Anisotropy = | 6.7818  |         |  |  |
| XX=          | 27.2914     | YX=     | 2.3833       | ZX=     | -1.1897 |  |  |
| XY=          | 2.3548      | YY=     | 26.1165      | ZY=     | -2.0088 |  |  |
| XZ=          | -0.9741     | YZ=     | -2.1103      | ZZ=     | 22.3168 |  |  |
| Eigenvalues: | 21.4143     |         | 24.5476      |         | 29.7628 |  |  |
| 32 H         | Isotropic = | 25.3327 | Anisotropy = | 7.4956  |         |  |  |
| XX=          | 30.2441     | YX=     | 0.0223       | ZX=     | -0.7623 |  |  |
| XY=          | 0.5955      | YY=     | 24.0268      | ZY=     | -1.1610 |  |  |
| XZ=          | -0.6408     | YZ=     | -1.4761      | ZZ=     | 21.7271 |  |  |
| Eigenvalues: | 21.0987     |         | 24.5697      |         | 30.3298 |  |  |
| 33 H         | Isotropic = | 26.7861 | Anisotropy = | 18.7803 |         |  |  |
| XX=          | 34.0867     | YX=     | 4.2124       | ZX=     | 7.1465  |  |  |
| XY=          | 6.1420      | YY=     | 27.7104      | ZY=     | -0.1842 |  |  |
| XZ=          | 7.4216      | YZ=     | 2.2695       | ZZ=     | 18.5612 |  |  |
| Eigenvalues: | 15.5982     |         | 25.4539      |         | 39.3063 |  |  |

|              |         |             |         |              |         |
|--------------|---------|-------------|---------|--------------|---------|
| 34           | H       | Isotropic = | 31.8333 | Anisotropy = | 16.5043 |
| XX=          | 27.0674 | YX=         | 0.9178  | ZX=          | -3.9035 |
| XY=          | 0.1311  | YY=         | 28.9936 | ZY=          | 5.6189  |
| XZ=          | -3.3350 | YZ=         | 6.5354  | ZZ=          | 39.4390 |
| Eigenvalues: | 24.3774 |             | 28.2864 |              | 42.8362 |
| 35           | H       | Isotropic = | 29.7427 | Anisotropy = | 7.9523  |
| XX=          | 33.6859 | YX=         | -3.3490 | ZX=          | -1.4946 |
| XY=          | -1.1808 | YY=         | 30.2586 | ZY=          | -0.7619 |
| XZ=          | -2.3954 | YZ=         | -0.4178 | ZZ=          | 25.2837 |
| Eigenvalues: | 24.6364 |             | 29.5476 |              | 35.0443 |
| 36           | H       | Isotropic = | 29.3280 | Anisotropy = | 9.0307  |
| XX=          | 30.9851 | YX=         | 3.3040  | ZX=          | 1.9984  |
| XY=          | 3.3717  | YY=         | 29.4480 | ZY=          | 2.1691  |
| XZ=          | 3.2234  | YZ=         | 2.9731  | ZZ=          | 27.5510 |
| Eigenvalues: | 25.7318 |             | 26.9038 |              | 35.3485 |
| 37           | H       | Isotropic = | 29.5860 | Anisotropy = | 7.9093  |
| XX=          | 30.2771 | YX=         | 1.9430  | ZX=          | -2.4128 |
| XY=          | 0.1042  | YY=         | 28.4684 | ZY=          | -4.1490 |
| XZ=          | -1.7933 | YZ=         | -4.6917 | ZZ=          | 30.0127 |
| Eigenvalues: | 24.6886 |             | 29.2106 |              | 34.8589 |
| 38           | H       | Isotropic = | 29.9872 | Anisotropy = | 8.3352  |
| XX=          | 28.3488 | YX=         | -0.3708 | ZX=          | -0.9436 |
| XY=          | -1.6275 | YY=         | 34.8541 | ZY=          | -1.7584 |
| XZ=          | -0.2722 | YZ=         | -2.7986 | ZZ=          | 26.7588 |
| Eigenvalues: | 25.8681 |             | 28.5496 |              | 35.5440 |
| 39           | H       | Isotropic = | 29.8427 | Anisotropy = | 7.9920  |
| XX=          | 33.6057 | YX=         | 2.1155  | ZX=          | 1.5239  |
| XY=          | 2.8894  | YY=         | 30.6052 | ZY=          | -1.0991 |
| XZ=          | 2.1004  | YZ=         | -0.5122 | ZZ=          | 25.3174 |
| Eigenvalues: | 24.6264 |             | 29.7311 |              | 35.1707 |
| 40           | H       | Isotropic = | 29.7903 | Anisotropy = | 4.6031  |
| XX=          | 26.5717 | YX=         | 0.3068  | ZX=          | -1.7926 |
| XY=          | 0.9965  | YY=         | 30.6540 | ZY=          | -1.0742 |
| XZ=          | -2.0640 | YZ=         | 0.4510  | ZZ=          | 32.1453 |
| Eigenvalues: | 25.9101 |             | 30.6018 |              | 32.8591 |
| 41           | H       | Isotropic = | 26.6361 | Anisotropy = | 5.7531  |
| XX=          | 27.8035 | YX=         | -3.2125 | ZX=          | -1.0123 |
| XY=          | -0.4107 | YY=         | 26.6244 | ZY=          | 1.5996  |
| XZ=          | -1.1616 | YZ=         | 3.8246  | ZZ=          | 25.4805 |
| Eigenvalues: | 23.2573 |             | 26.1796 |              | 30.4716 |
| 42           | H       | Isotropic = | 26.6493 | Anisotropy = | 7.0819  |
| XX=          | 27.1200 | YX=         | -0.4065 | ZX=          | -1.2634 |
| XY=          | -2.5796 | YY=         | 25.7207 | ZY=          | 4.3340  |
| XZ=          | -0.4795 | YZ=         | 4.2050  | ZZ=          | 27.1071 |
| Eigenvalues: | 22.0201 |             | 26.5572 |              | 31.3706 |

Number of frequencies: 120

harmonic frequencies in  $\text{cm}^{-1}$ , reduced masses in amu,

force constants in mDyne/A, and

normal modes in cartesian coordinates: 120

IR intensities in  $\text{km/mol}$

vibration #      1    2    3    4    5    6

-----

frequencies    42.13 70.77 89.60 94.75 105.47 155.90

intensities    0.99 1.81 0.83 0.03 0.41 0.67

reduc. mass    0.62 0.70 0.46 1.18 2.23 1.38

force const    0.00 0.00 0.00 0.01 0.01 0.02

vibration #      7    8    9    10   11   12

-----

frequencies    169.47 195.72 229.79 238.56 245.31 260.12

intensities    1.02 1.86 2.34 1.90 6.05 0.59

reduc. mass    0.68 0.73 1.06 0.61 0.75 1.27

force const    0.01 0.02 0.03 0.02 0.03 0.05

vibration #      13   14   15   16   17   18

-----

frequencies    271.47 274.18 303.52 309.76 314.64 342.16

intensities    1.56 1.03 1.93 5.59 3.25 1.08

reduc. mass    0.66 0.78 2.36 0.40 0.34 1.36

force const    0.03 0.03 0.13 0.02 0.02 0.09

vibration #      19   20   21   22   23   24

-----

|             |        |        |        |        |        |        |
|-------------|--------|--------|--------|--------|--------|--------|
| frequencies | 356.44 | 403.83 | 430.77 | 434.68 | 473.79 | 491.49 |
| intensities | 1.26   | 4.13   | 43.03  | 7.12   | 7.00   | 13.47  |
| reduc. mass | 0.67   | 0.96   | 0.50   | 0.68   | 0.48   | 1.01   |
| force const | 0.05   | 0.09   | 0.06   | 0.08   | 0.06   | 0.14   |

vibration #      25    26    27    28    29    30

-----

|             |        |        |        |        |        |        |
|-------------|--------|--------|--------|--------|--------|--------|
| frequencies | 510.08 | 525.25 | 541.52 | 561.49 | 568.37 | 601.12 |
| intensities | 9.17   | 7.68   | 6.22   | 10.50  | 31.73  | 23.62  |
| reduc. mass | 0.65   | 1.50   | 0.73   | 0.66   | 0.51   | 2.21   |
| force const | 0.10   | 0.24   | 0.13   | 0.12   | 0.10   | 0.47   |

vibration #      31    32    33    34    35    36

-----

|             |        |        |        |        |        |        |
|-------------|--------|--------|--------|--------|--------|--------|
| frequencies | 646.90 | 670.43 | 683.43 | 711.95 | 723.87 | 749.36 |
| intensities | 110.22 | 1.10   | 2.68   | 2.37   | 25.09  | 2.48   |
| reduc. mass | 0.67   | 1.04   | 1.04   | 1.03   | 0.40   | 1.61   |
| force const | 0.16   | 0.27   | 0.29   | 0.31   | 0.12   | 0.53   |

vibration #      37    38    39    40    41    42

-----

|             |        |        |        |        |        |        |
|-------------|--------|--------|--------|--------|--------|--------|
| frequencies | 761.55 | 805.40 | 830.70 | 837.08 | 870.31 | 923.88 |
| intensities | 3.53   | 4.86   | 9.63   | 5.55   | 13.51  | 2.75   |
| reduc. mass | 0.62   | 0.55   | 0.79   | 1.73   | 0.56   | 0.78   |
| force const | 0.21   | 0.21   | 0.32   | 0.71   | 0.25   | 0.39   |

vibration #      43    44    45    46    47    48

-----

|             |        |        |        |         |         |         |
|-------------|--------|--------|--------|---------|---------|---------|
| frequencies | 928.31 | 966.77 | 977.76 | 1006.20 | 1013.05 | 1019.23 |
|-------------|--------|--------|--------|---------|---------|---------|

|             |      |      |       |       |      |      |
|-------------|------|------|-------|-------|------|------|
| intensities | 7.80 | 8.02 | 17.82 | 15.09 | 1.50 | 2.31 |
| reduc. mass | 0.65 | 0.28 | 1.04  | 0.36  | 0.24 | 0.36 |
| force const | 0.33 | 0.15 | 0.58  | 0.21  | 0.15 | 0.22 |

vibration #      49    50    51    52    53    54

-----

|             |         |         |         |         |         |         |
|-------------|---------|---------|---------|---------|---------|---------|
| frequencies | 1030.12 | 1045.52 | 1055.33 | 1060.70 | 1072.50 | 1094.81 |
| intensities | 17.25   | 20.47   | 11.74   | 14.39   | 17.53   | 29.48   |
| reduc. mass | 0.50    | 0.37    | 0.51    | 0.20    | 0.31    | 0.64    |
| force const | 0.31    | 0.24    | 0.33    | 0.13    | 0.21    | 0.45    |

vibration #      55    56    57    58    59    60

-----

|             |         |         |         |         |         |         |
|-------------|---------|---------|---------|---------|---------|---------|
| frequencies | 1109.69 | 1125.99 | 1138.14 | 1170.13 | 1184.77 | 1213.29 |
| intensities | 55.80   | 27.28   | 6.49    | 38.35   | 11.34   | 75.16   |
| reduc. mass | 0.39    | 0.41    | 0.46    | 0.59    | 1.18    | 0.58    |
| force const | 0.28    | 0.31    | 0.35    | 0.48    | 0.98    | 0.50    |

vibration #      61    62    63    64    65    66

-----

|             |         |         |         |         |         |         |
|-------------|---------|---------|---------|---------|---------|---------|
| frequencies | 1244.58 | 1247.19 | 1263.24 | 1281.03 | 1322.43 | 1344.50 |
| intensities | 97.51   | 37.59   | 49.86   | 13.55   | 31.94   | 115.04  |
| reduc. mass | 0.63    | 0.23    | 0.38    | 0.20    | 0.30    | 0.62    |
| force const | 0.58    | 0.21    | 0.36    | 0.20    | 0.31    | 0.66    |

vibration #      67    68    69    70    71    72

-----

|             |         |         |         |         |         |         |
|-------------|---------|---------|---------|---------|---------|---------|
| frequencies | 1353.40 | 1392.06 | 1398.93 | 1409.44 | 1414.24 | 1479.04 |
| intensities | 47.75   | 115.54  | 136.02  | 193.94  | 265.34  | 5.94    |

|             |      |      |      |      |      |      |
|-------------|------|------|------|------|------|------|
| reduc. mass | 1.17 | 0.63 | 0.77 | 0.48 | 0.35 | 1.51 |
| force const | 1.26 | 0.72 | 0.89 | 0.57 | 0.42 | 1.94 |

vibration #      73    74    75    76    77    78

-----

|             |         |         |         |         |         |         |
|-------------|---------|---------|---------|---------|---------|---------|
| frequencies | 1484.90 | 1490.32 | 1512.48 | 1521.09 | 1538.50 | 1546.72 |
| intensities | 5.43    | 28.43   | 179.54  | 9.96    | 60.37   | 14.20   |
| reduc. mass | 0.81    | 0.63    | 1.47    | 2.46    | 0.57    | 0.75    |
| force const | 1.05    | 0.82    | 1.98    | 3.35    | 0.79    | 1.06    |

vibration #      79    80    81    82    83    84

-----

|             |         |         |         |         |         |         |
|-------------|---------|---------|---------|---------|---------|---------|
| frequencies | 1568.23 | 1582.25 | 1605.88 | 1631.64 | 1641.69 | 1649.44 |
| intensities | 58.27   | 51.76   | 27.07   | 23.82   | 53.20   | 44.94   |
| reduc. mass | 0.60    | 0.58    | 0.66    | 0.38    | 0.21    | 0.29    |
| force const | 0.86    | 0.85    | 1.01    | 0.60    | 0.34    | 0.47    |

vibration #      85    86    87    88    89    90

-----

|             |         |         |         |         |         |         |
|-------------|---------|---------|---------|---------|---------|---------|
| frequencies | 1654.54 | 1658.91 | 1660.73 | 1663.82 | 1667.19 | 1671.84 |
| intensities | 28.79   | 20.09   | 19.48   | 26.74   | 31.57   | 24.88   |
| reduc. mass | 0.28    | 0.33    | 0.21    | 0.14    | 0.15    | 0.16    |
| force const | 0.45    | 0.54    | 0.35    | 0.22    | 0.24    | 0.26    |

vibration #      91    92    93    94    95    96

-----

|             |         |         |         |         |         |         |
|-------------|---------|---------|---------|---------|---------|---------|
| frequencies | 1675.21 | 1683.08 | 1688.98 | 1731.71 | 1750.10 | 1811.89 |
| intensities | 14.39   | 88.62   | 21.36   | 35.82   | 200.41  | 626.09  |
| reduc. mass | 0.34    | 0.59    | 0.30    | 1.05    | 1.64    | 1.70    |

force const 0.56 0.99 0.50 1.85 2.96 3.29

vibration # 97 98 99 100 101 102

-----

frequencies 1885.05 1905.62 3024.77 3025.80 3043.36 3057.59

intensities 171.39 230.96 281.60 597.76 843.81 418.98

reduc. mass 0.53 0.81 0.14 0.14 0.16 0.14

force const 1.11 1.74 0.77 0.74 0.87 0.79

vibration # 103 104 105 106 107 108

-----

frequencies 3060.38 3066.82 3086.13 3103.19 3120.27 3129.05

intensities 589.76 514.12 225.63 162.19 224.09 91.67

reduc. mass 0.28 0.26 0.48 0.46 0.27 0.12

force const 1.55 1.42 2.72 2.62 1.55 0.68

vibration # 109 110 111 112 113 114

-----

frequencies 3131.79 3134.63 3136.99 3142.57 3147.79 3148.73

intensities 155.38 360.82 566.58 404.96 225.90 62.28

reduc. mass 0.13 0.28 0.44 0.13 0.17 0.23

force const 0.74 1.65 2.56 0.78 1.00 1.33

vibration # 115 116 117 118 119 120

-----

frequencies 3158.85 3163.83 3194.68 3232.30 3838.50 3856.86

intensities 196.03 890.69 475.07 460.89 91.88 69.57

reduc. mass 0.37 0.15 0.48 0.15 0.89 0.89

force const 2.15 0.86 2.87 0.91 7.73 7.80



Number of imaginary frequencies: 0

## Conformation 5

Boltzmann Population = 4.0% (relative energy = 1.39 kcal/mol)

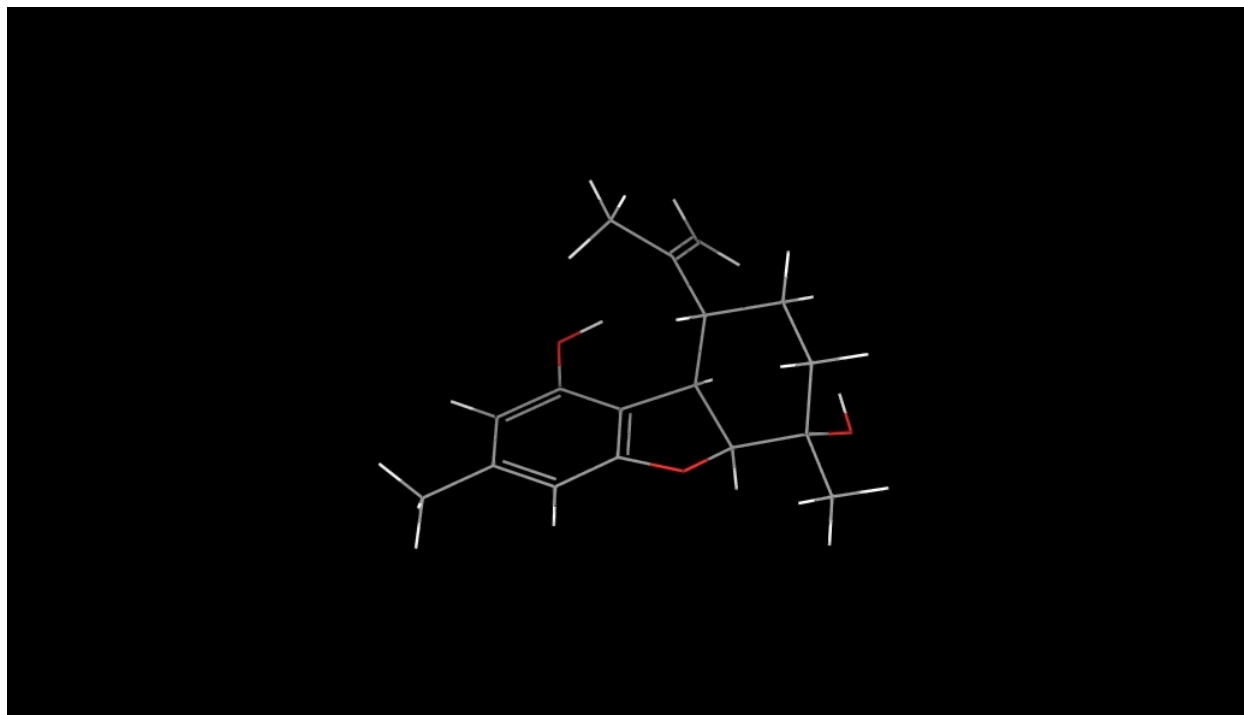

Geometries and Energy Method: M06-2X-D3/6-31G(d,p)

NMR Method: mPW1PW91/6-311+G(2d,p)

Thermodynamic properties for P = 1.00 atm, calculated at 1 temperatures

T = 298.15 K, P = 1.00 atm

Total internal energy,  $U_{\text{tot}}(\text{SCFE} + \text{ZPE} + U)$ : -885.980886 hartrees

Total enthalpy,  $H_{\text{tot}}(U_{\text{tot}} + pV)$ : -885.979942 hartrees

Total Gibbs free energy,  $G_{\text{tot}}(H_{\text{tot}} - T^*S)$ : -886.042752 hartrees

Optimized Geometry:

| Center Number | Atomic Number | Atomic Type | Coordinates (Angstroms) |           |           |
|---------------|---------------|-------------|-------------------------|-----------|-----------|
|               |               |             | X                       | Y         | Z         |
| 1             | 6             | 0           | -6.131500               | -0.632700 | -2.559300 |
| 2             | 6             | 0           | -4.661300               | -0.329500 | -2.856400 |
| 3             | 6             | 0           | -3.952600               | -1.603700 | -3.330400 |
| 4             | 6             | 0           | -4.050500               | -2.739700 | -2.281700 |

|    |   |   |           |           |           |
|----|---|---|-----------|-----------|-----------|
| 5  | 6 | 0 | -5.483500 | -2.947700 | -1.746500 |
| 6  | 6 | 0 | -6.292900 | -1.680200 | -1.452500 |
| 7  | 6 | 0 | -7.754400 | -2.024100 | -1.217700 |
| 8  | 6 | 0 | -2.506700 | -1.381400 | -3.742900 |
| 9  | 6 | 0 | -3.859900 | -4.077800 | -2.959600 |
| 10 | 6 | 0 | -5.132200 | -4.576000 | -3.243100 |
| 11 | 6 | 0 | -2.747000 | -4.751700 | -3.444400 |
| 12 | 6 | 0 | -2.937700 | -5.936500 | -4.167100 |
| 13 | 6 | 0 | -4.217000 | -6.423000 | -4.427800 |
| 14 | 6 | 0 | -5.347700 | -5.731600 | -3.968100 |
| 15 | 8 | 0 | -1.473500 | -4.316500 | -3.263700 |
| 16 | 8 | 0 | -6.121300 | -3.775000 | -2.736900 |
| 17 | 8 | 0 | -5.815500 | -1.161800 | -0.212700 |
| 18 | 6 | 0 | -4.395400 | -7.714600 | -5.186100 |
| 19 | 6 | 0 | -2.171700 | -1.701400 | -5.172900 |
| 20 | 6 | 0 | -1.589300 | -0.943900 | -2.873800 |
| 21 | 1 | 0 | -6.612000 | -1.006600 | -3.471600 |
| 22 | 1 | 0 | -6.664700 | 0.271500  | -2.248400 |
| 23 | 1 | 0 | -4.578500 | 0.444000  | -3.626700 |
| 24 | 1 | 0 | -4.156000 | 0.082000  | -1.970700 |
| 25 | 1 | 0 | -4.503200 | -1.956300 | -4.213100 |
| 26 | 1 | 0 | -3.353900 | -2.550700 | -1.456400 |
| 27 | 1 | 0 | -5.433300 | -3.525500 | -0.812400 |
| 28 | 1 | 0 | -8.298900 | -1.119400 | -0.935100 |
| 29 | 1 | 0 | -8.196700 | -2.452900 | -2.118300 |
| 30 | 1 | 0 | -7.839400 | -2.748000 | -0.403100 |
| 31 | 1 | 0 | -2.059900 | -6.461000 | -4.530100 |
| 32 | 1 | 0 | -6.352400 | -6.089900 | -4.162600 |
| 33 | 1 | 0 | -1.487300 | -3.417400 | -2.903500 |
| 34 | 1 | 0 | -4.902600 | -0.873800 | -0.328400 |
| 35 | 1 | 0 | -3.528200 | -7.928900 | -5.814300 |
| 36 | 1 | 0 | -4.522600 | -8.554500 | -4.495300 |
| 37 | 1 | 0 | -5.282100 | -7.676900 | -5.823900 |
| 38 | 1 | 0 | -2.772500 | -1.081100 | -5.847700 |
| 39 | 1 | 0 | -1.114800 | -1.537100 | -5.392600 |
| 40 | 1 | 0 | -2.419600 | -2.746300 | -5.393000 |
| 41 | 1 | 0 | -0.558300 | -0.781700 | -3.173000 |
| 42 | 1 | 0 | -1.840900 | -0.710800 | -1.842000 |

-----

SCF GIAO Magnetic shielding tensor (ppm):

|              |          |             |          |              |          |
|--------------|----------|-------------|----------|--------------|----------|
| 1            | C        | Isotropic = | 150.0353 | Anisotropy = | 19.4278  |
| XX=          | 144.8057 | YX=         | -0.5137  | ZX=          | 2.5843   |
| XY=          | -6.6060  | YY=         | 156.0571 | ZY=          | 9.2021   |
| XZ=          | -3.1430  | YZ=         | 9.1970   | ZZ=          | 149.2430 |
| Eigenvalues: | 141.6389 | 145.4798    | 162.9872 |              |          |
| 2            | C        | Isotropic = | 157.6289 | Anisotropy = | 26.3532  |
| XX=          | 169.4411 | YX=         | -8.0872  | ZX=          | 7.0245   |
| XY=          | -3.9291  | YY=         | 157.4212 | ZY=          | -7.7871  |
| XZ=          | 7.7114   | YZ=         | -6.9767  | ZZ=          | 146.0244 |
| Eigenvalues: | 141.7383 | 155.9506    | 175.1977 |              |          |

|              |           |             |          |              |          |
|--------------|-----------|-------------|----------|--------------|----------|
| 3            | C         | Isotropic = | 137.0466 | Anisotropy = | 10.7467  |
| XX=          | 141.7862  | YX=         | -4.1890  | ZX=          | -0.6949  |
| XY=          | 7.7834    | YY=         | 141.9969 | ZY=          | -3.7685  |
| XZ=          | 6.5195    | YZ=         | -7.4133  | ZZ=          | 127.3566 |
| Eigenvalues: | 124.8096  | 142.1191    | 144.2110 |              |          |
| 4            | C         | Isotropic = | 135.8679 | Anisotropy = | 30.2510  |
| XX=          | 125.9128  | YX=         | 6.0119   | ZX=          | 1.8153   |
| XY=          | 5.5408    | YY=         | 151.5066 | ZY=          | -2.1809  |
| XZ=          | 8.4826    | YZ=         | 18.6911  | ZZ=          | 130.1843 |
| Eigenvalues: | 122.4718  | 129.0966    | 156.0352 |              |          |
| 5            | C         | Isotropic = | 95.3298  | Anisotropy = | 58.4343  |
| XX=          | 119.1272  | YX=         | 12.5445  | ZX=          | -20.0401 |
| XY=          | 0.4439    | YY=         | 85.8923  | ZY=          | -21.6635 |
| XZ=          | -26.3282  | YZ=         | -15.5518 | ZZ=          | 80.9700  |
| Eigenvalues: | 61.0691   | 90.6344     | 134.2860 |              |          |
| 6            | C         | Isotropic = | 116.6755 | Anisotropy = | 54.1341  |
| XX=          | 118.7115  | YX=         | 10.3553  | ZX=          | -27.5192 |
| XY=          | 8.8220    | YY=         | 106.6614 | ZY=          | -11.8566 |
| XZ=          | -23.7312  | YZ=         | -12.8628 | ZZ=          | 124.6534 |
| Eigenvalues: | 95.7056   | 101.5559    | 152.7649 |              |          |
| 7            | C         | Isotropic = | 161.2296 | Anisotropy = | 40.0028  |
| XX=          | 149.6502  | YX=         | -10.6876 | ZX=          | 0.0807   |
| XY=          | -7.8374   | YY=         | 185.2284 | ZY=          | -3.2953  |
| XZ=          | -0.0748   | YZ=         | -4.8704  | ZZ=          | 148.8102 |
| Eigenvalues: | 146.8046  | 148.9860    | 187.8981 |              |          |
| 8            | C         | Isotropic = | 16.6335  | Anisotropy = | 213.1559 |
| XX=          | 39.4234   | YX=         | 81.5062  | ZX=          | 101.9432 |
| XY=          | 83.8252   | YY=         | -26.6341 | ZY=          | -3.5562  |
| XZ=          | 97.8451   | YZ=         | 4.6562   | ZZ=          | 37.1113  |
| Eigenvalues: | -109.8532 | 1.0163      | 158.7375 |              |          |
| 9            | C         | Isotropic = | 68.8612  | Anisotropy = | 107.7717 |
| XX=          | 23.5585   | YX=         | -1.4049  | ZX=          | 8.0984   |
| XY=          | -16.9988  | YY=         | 63.4065  | ZY=          | 38.2758  |
| XZ=          | 15.7797   | YZ=         | 41.6234  | ZZ=          | 119.6186 |
| Eigenvalues: | 16.1801   | 49.6945     | 140.7090 |              |          |
| 10           | C         | Isotropic = | 20.5390  | Anisotropy = | 110.4394 |
| XX=          | -32.5489  | YX=         | 32.2027  | ZX=          | -5.5464  |
| XY=          | 42.9564   | YY=         | 12.1693  | ZY=          | 36.7523  |
| XZ=          | -16.4449  | YZ=         | 26.1455  | ZZ=          | 81.9966  |
| Eigenvalues: | -58.5736  | 26.0254     | 94.1653  |              |          |
| 11           | C         | Isotropic = | 28.2141  | Anisotropy = | 135.2692 |
| XX=          | 15.3466   | YX=         | -6.3573  | ZX=          | 9.5344   |
| XY=          | 0.2165    | YY=         | -25.1764 | ZY=          | 61.8866  |
| XZ=          | 5.6104    | YZ=         | 54.3642  | ZZ=          | 94.4720  |
| Eigenvalues: | -49.2669  | 15.5156     | 118.3935 |              |          |
| 12           | C         | Isotropic = | 74.5480  | Anisotropy = | 117.1399 |
| XX=          | 20.3988   | YX=         | 29.1280  | ZX=          | -4.3131  |
| XY=          | 40.5163   | YY=         | 62.2443  | ZY=          | 37.8512  |
| XZ=          | -7.0798   | YZ=         | 25.9957  | ZZ=          | 141.0008 |
| Eigenvalues: | -2.4456   | 73.4483     | 152.6412 |              |          |
| 13           | C         | Isotropic = | 40.7650  | Anisotropy = | 194.5100 |
| XX=          | -41.8461  | YX=         | -16.3708 | ZX=          | 20.3316  |

|              |             |          |              |     |          |          |
|--------------|-------------|----------|--------------|-----|----------|----------|
| XY=          | -18.6398    | YY=      | 29.2500      | ZY= | 67.4719  |          |
| XZ=          | 28.2846     | YZ=      | 71.8671      | ZZ= | 134.8912 |          |
| Eigenvalues: | -56.4483    |          | 8.3051       |     | 170.4384 |          |
| 14 C         | Isotropic = | 80.9841  | Anisotropy = |     |          | 121.1414 |
| XX=          | 74.6237     | YX=      | 9.3520       | ZX= | 1.9367   |          |
| XY=          | -7.1553     | YY=      | 33.0883      | ZY= | 61.0813  |          |
| XZ=          | 1.9743      | YZ=      | 55.5570      | ZZ= | 135.2403 |          |
| Eigenvalues: | 6.6404      |          | 74.5669      |     | 161.7451 |          |
| 15 O         | Isotropic = | 203.4951 | Anisotropy = |     |          | 75.0674  |
| XX=          | 148.2851    | YX=      | 12.8148      | ZX= | -0.4643  |          |
| XY=          | 5.8899      | YY=      | 211.4176     | ZY= | 10.9964  |          |
| XZ=          | 23.1247     | YZ=      | -28.9472     | ZZ= | 250.7826 |          |
| Eigenvalues: | 145.4342    |          | 211.5110     |     | 253.5401 |          |
| 16 O         | Isotropic = | 186.1491 | Anisotropy = |     |          | 115.9842 |
| XX=          | 222.4768    | YX=      | -60.8667     | ZX= | 36.2135  |          |
| XY=          | -45.1846    | YY=      | 150.6954     | ZY= | 32.4912  |          |
| XZ=          | 33.2928     | YZ=      | -35.4012     | ZZ= | 185.2751 |          |
| Eigenvalues: | 118.7437    |          | 176.2318     |     | 263.4719 |          |
| 17 O         | Isotropic = | 255.8379 | Anisotropy = |     |          | 40.1149  |
| XX=          | 274.5035    | YX=      | 7.2516       | ZX= | -18.8750 |          |
| XY=          | 1.4444      | YY=      | 243.8149     | ZY= | -6.2803  |          |
| XZ=          | -9.9755     | YZ=      | -11.5213     | ZZ= | 249.1953 |          |
| Eigenvalues: | 236.2729    |          | 248.6597     |     | 282.5812 |          |
| 18 C         | Isotropic = | 163.7743 | Anisotropy = |     |          | 41.3209  |
| XX=          | 184.7824    | YX=      | 8.5175       | ZX= | -11.4609 |          |
| XY=          | 13.0585     | YY=      | 158.7669     | ZY= | -10.5878 |          |
| XZ=          | -5.0775     | YZ=      | -6.3240      | ZZ= | 147.7735 |          |
| Eigenvalues: | 143.0477    |          | 156.9536     |     | 191.3216 |          |
| 19 C         | Isotropic = | 157.9337 | Anisotropy = |     |          | 42.5426  |
| XX=          | 159.5410    | YX=      | -15.3203     | ZX= | -17.3990 |          |
| XY=          | -11.9726    | YY=      | 159.2293     | ZY= | 8.7972   |          |
| XZ=          | -19.0395    | YZ=      | 11.5600      | ZZ= | 155.0308 |          |
| Eigenvalues: | 138.7703    |          | 148.7354     |     | 186.2954 |          |
| 20 C         | Isotropic = | 72.6365  | Anisotropy = |     |          | 130.3311 |
| XX=          | 86.6411     | YX=      | 76.5590      | ZX= | 49.7766  |          |
| XY=          | 73.2595     | YY=      | 27.9178      | ZY= | -15.8162 |          |
| XZ=          | 50.6160     | YZ=      | -18.6724     | ZZ= | 103.3507 |          |
| Eigenvalues: | -36.6554    |          | 95.0411      |     | 159.5239 |          |
| 21 H         | Isotropic = | 30.0824  | Anisotropy = |     |          | 6.2576   |
| XX=          | 27.1770     | YX=      | -0.8878      | ZX= | -0.9271  |          |
| XY=          | 0.0081      | YY=      | 29.3209      | ZY= | -1.3477  |          |
| XZ=          | 0.3654      | YZ=      | -1.7996      | ZZ= | 33.7494  |          |
| Eigenvalues: | 27.0321     |          | 28.9610      |     | 34.2542  |          |
| 22 H         | Isotropic = | 30.0888  | Anisotropy = |     |          | 8.9476   |
| XX=          | 33.7462     | YX=      | -2.1171      | ZX= | 3.9007   |          |
| XY=          | -1.7378     | YY=      | 29.2914      | ZY= | 0.3984   |          |
| XZ=          | 4.1367      | YZ=      | 0.1783       | ZZ= | 27.2289  |          |
| Eigenvalues: | 25.0190     |          | 29.1936      |     | 36.0539  |          |
| 23 H         | Isotropic = | 30.2267  | Anisotropy = |     |          | 9.6251   |
| XX=          | 29.6950     | YX=      | 0.7709       | ZX= | 3.9715   |          |
| XY=          | 1.0427      | YY=      | 30.8101      | ZY= | 4.3814   |          |
| XZ=          | 4.2695      | YZ=      | 4.1354       | ZZ= | 30.1749  |          |

|              |             |         |              |         |         |
|--------------|-------------|---------|--------------|---------|---------|
| Eigenvalues: | 24.7017     | 29.3349 | 36.6434      |         |         |
| 24 H         | Isotropic = | 30.5199 | Anisotropy = | 6.2664  |         |
| XX=          | 31.5030     | YX=     | 1.5713       | ZX=     | -2.3980 |
| XY=          | 1.7863      | YY=     | 32.5400      | ZY=     | -2.0940 |
| XZ=          | -1.4427     | YZ=     | -1.4318      | ZZ=     | 27.5166 |
| Eigenvalues: | 26.5447     | 30.3175 | 34.6975      |         |         |
| 25 H         | Isotropic = | 30.0948 | Anisotropy = | 3.7695  |         |
| XX=          | 30.7223     | YX=     | -1.7589      | ZX=     | -2.4292 |
| XY=          | -0.1066     | YY=     | 29.6909      | ZY=     | 0.4402  |
| XZ=          | -0.0699     | YZ=     | 2.6530       | ZZ=     | 29.8710 |
| Eigenvalues: | 28.2133     | 29.4633 | 32.6077      |         |         |
| 26 H         | Isotropic = | 28.8444 | Anisotropy = | 4.3420  |         |
| XX=          | 27.7896     | YX=     | -0.0986      | ZX=     | 0.2900  |
| XY=          | -1.8517     | YY=     | 29.3083      | ZY=     | -2.0580 |
| XZ=          | -0.8565     | YZ=     | -2.5544      | ZZ=     | 29.4354 |
| Eigenvalues: | 26.4464     | 28.3478 | 31.7391      |         |         |
| 27 H         | Isotropic = | 27.6248 | Anisotropy = | 4.7471  |         |
| XX=          | 26.8325     | YX=     | 0.6846       | ZX=     | -1.1007 |
| XY=          | -0.8749     | YY=     | 27.6341      | ZY=     | 0.9070  |
| XZ=          | -3.3178     | YZ=     | 2.7926       | ZZ=     | 28.4077 |
| Eigenvalues: | 24.8507     | 27.2341 | 30.7895      |         |         |
| 28 H         | Isotropic = | 30.6019 | Anisotropy = | 9.4927  |         |
| XX=          | 34.0019     | YX=     | -3.3031      | ZX=     | 1.8958  |
| XY=          | -4.3166     | YY=     | 30.8329      | ZY=     | -0.8105 |
| XZ=          | 1.8718      | YZ=     | -0.6067      | ZZ=     | 26.9709 |
| Eigenvalues: | 26.4747     | 28.4006 | 36.9303      |         |         |
| 29 H         | Isotropic = | 30.2820 | Anisotropy = | 8.0990  |         |
| XX=          | 29.5121     | YX=     | 0.1222       | ZX=     | -1.9979 |
| XY=          | 0.3687      | YY=     | 32.2787      | ZY=     | -4.6104 |
| XZ=          | -1.8337     | YZ=     | -4.2844      | ZZ=     | 29.0554 |
| Eigenvalues: | 25.4174     | 29.7474 | 35.6814      |         |         |
| 30 H         | Isotropic = | 30.4357 | Anisotropy = | 9.4216  |         |
| XX=          | 27.7370     | YX=     | -1.0096      | ZX=     | 0.0206  |
| XY=          | -0.8138     | YY=     | 34.4417      | ZY=     | 4.5694  |
| XZ=          | 0.0863      | YZ=     | 3.5805       | ZZ=     | 29.1285 |
| Eigenvalues: | 26.6866     | 27.9037 | 36.7168      |         |         |
| 31 H         | Isotropic = | 25.2796 | Anisotropy = | 6.7903  |         |
| XX=          | 27.0518     | YX=     | 2.3768       | ZX=     | -0.9907 |
| XY=          | 2.5049      | YY=     | 26.3363      | ZY=     | -2.3167 |
| XZ=          | -0.7375     | YZ=     | -2.2390      | ZZ=     | 22.4508 |
| Eigenvalues: | 21.3873     | 24.6450 | 29.8065      |         |         |
| 32 H         | Isotropic = | 25.3585 | Anisotropy = | 7.3695  |         |
| XX=          | 30.0830     | YX=     | 0.5273       | ZX=     | -0.7565 |
| XY=          | 0.9817      | YY=     | 24.1566      | ZY=     | -1.3285 |
| XZ=          | -0.6320     | YZ=     | -1.6416      | ZZ=     | 21.8359 |
| Eigenvalues: | 21.1018     | 24.7022 | 30.2715      |         |         |
| 33 H         | Isotropic = | 26.5623 | Anisotropy = | 16.7927 |         |
| XX=          | 35.2056     | YX=     | 4.2326       | ZX=     | 3.4267  |
| XY=          | 6.0764      | YY=     | 26.3538      | ZY=     | -2.7500 |
| XZ=          | 2.1552      | YZ=     | -0.4139      | ZZ=     | 18.1276 |
| Eigenvalues: | 16.9887     | 24.9409 | 37.7575      |         |         |
| 34 H         | Isotropic = | 30.5434 | Anisotropy = | 14.8086 |         |

|              |             |         |              |     |         |        |  |
|--------------|-------------|---------|--------------|-----|---------|--------|--|
| XX=          | 24.9320     | YX=     | -0.8901      | ZX= | -3.8390 |        |  |
| XY=          | -0.8458     | YY=     | 38.2640      | ZY= | -4.6468 |        |  |
| XZ=          | -4.9862     | YZ=     | -5.3463      | ZZ= | 28.4343 |        |  |
| Eigenvalues: | 21.1504     |         | 30.0640      |     | 40.4158 |        |  |
| 35 H         | Isotropic = | 29.7239 | Anisotropy = |     |         | 7.9436 |  |
| XX=          | 33.8201     | YX=     | -3.0822      | ZX= | -1.6299 |        |  |
| XY=          | -1.0300     | YY=     | 29.8960      | ZY= | -0.8898 |        |  |
| XZ=          | -2.7235     | YZ=     | -0.5790      | ZZ= | 25.4555 |        |  |
| Eigenvalues: | 24.6296     |         | 29.5224      |     | 35.0196 |        |  |
| 36 H         | Isotropic = | 29.3154 | Anisotropy = |     |         | 9.1322 |  |
| XX=          | 30.6373     | YX=     | 3.5028       | ZX= | 1.8482  |        |  |
| XY=          | 3.7184      | YY=     | 29.8947      | ZY= | 2.0887  |        |  |
| XZ=          | 2.9927      | YZ=     | 2.9045       | ZZ= | 27.4143 |        |  |
| Eigenvalues: | 25.8498     |         | 26.6929      |     | 35.4036 |        |  |
| 37 H         | Isotropic = | 29.6121 | Anisotropy = |     |         | 7.8575 |  |
| XX=          | 30.1271     | YX=     | 1.9750       | ZX= | -2.1098 |        |  |
| XY=          | 0.1175      | YY=     | 28.5395      | ZY= | -4.3455 |        |  |
| XZ=          | -1.3254     | YZ=     | -4.8250      | ZZ= | 30.1696 |        |  |
| Eigenvalues: | 24.6793     |         | 29.3065      |     | 34.8504 |        |  |
| 38 H         | Isotropic = | 30.0472 | Anisotropy = |     |         | 8.0146 |  |
| XX=          | 27.3877     | YX=     | -0.8313      | ZX= | 0.5925  |        |  |
| XY=          | -1.0667     | YY=     | 28.3420      | ZY= | 2.7398  |        |  |
| XZ=          | 1.0392      | YZ=     | 2.4369       | ZZ= | 34.4121 |        |  |
| Eigenvalues: | 26.2049     |         | 28.5465      |     | 35.3903 |        |  |
| 39 H         | Isotropic = | 29.9702 | Anisotropy = |     |         | 8.7914 |  |
| XX=          | 28.2666     | YX=     | -3.8294      | ZX= | -0.7519 |        |  |
| XY=          | -2.2051     | YY=     | 34.2501      | ZY= | -0.0815 |        |  |
| XZ=          | -1.4031     | YZ=     | 2.7593       | ZZ= | 27.3940 |        |  |
| Eigenvalues: | 26.5680     |         | 27.5115      |     | 35.8312 |        |  |
| 40 H         | Isotropic = | 30.0024 | Anisotropy = |     |         | 5.8166 |  |
| XX=          | 32.2424     | YX=     | 2.4284       | ZX= | -1.3491 |        |  |
| XY=          | 1.9018      | YY=     | 30.2026      | ZY= | 2.3265  |        |  |
| XZ=          | -0.2233     | YZ=     | 4.1539       | ZZ= | 27.5624 |        |  |
| Eigenvalues: | 24.8961     |         | 31.2310      |     | 33.8802 |        |  |
| 41 H         | Isotropic = | 26.3381 | Anisotropy = |     |         | 5.5578 |  |
| XX=          | 25.2191     | YX=     | 3.0276       | ZX= | -1.1313 |        |  |
| XY=          | 1.0753      | YY=     | 27.6087      | ZY= | -1.2238 |        |  |
| XZ=          | 0.1865      | YZ=     | -3.2542      | ZZ= | 26.1866 |        |  |
| Eigenvalues: | 23.7154     |         | 25.2556      |     | 30.0433 |        |  |
| 42 H         | Isotropic = | 26.4552 | Anisotropy = |     |         | 8.2378 |  |
| XX=          | 24.9954     | YX=     | 0.6775       | ZX= | 0.4463  |        |  |
| XY=          | 3.4080      | YY=     | 28.5370      | ZY= | -5.9718 |        |  |
| XZ=          | -0.6816     | YZ=     | -2.2473      | ZZ= | 25.8333 |        |  |
| Eigenvalues: | 22.3382     |         | 25.0804      |     | 31.9471 |        |  |

Number of frequencies: 120

harmonic frequencies in  $\text{cm}^{-1}$ , reduced masses in amu,

force constants in mDyne/A, and

normal modes in cartesian coordinates: 120

IR intensities in  $\text{km/mol}$

vibration #      1    2    3    4    5    6

-----

frequencies    56.85 72.14 86.16 94.91 122.22 129.94

intensities    1.38 1.31 0.86 0.27 1.03 2.29

reduc. mass    1.14 0.96 0.45 1.16 1.06 0.93

force const    0.00 0.00 0.00 0.01 0.01 0.01

vibration #      7    8    9    10   11   12

-----

frequencies    165.43 193.26 221.77 224.22 251.72 257.75

intensities    0.67 0.11 0.15 7.58 3.81 3.75

reduc. mass    0.83 0.64 1.45 0.34 1.23 0.99

force const    0.01 0.01 0.04 0.01 0.05 0.04

vibration #      13   14   15   16   17   18

-----

frequencies    265.60 270.84 303.31 311.25 326.97 330.26

intensities    5.10 5.06 1.84 4.80 0.47 5.20

reduc. mass    0.33 0.93 0.82 1.03 0.20 1.65

force const    0.01 0.04 0.04 0.06 0.01 0.11

vibration #      19   20   21   22   23   24

-----



|             |        |        |        |        |        |        |
|-------------|--------|--------|--------|--------|--------|--------|
| frequencies | 365.20 | 385.90 | 401.10 | 440.10 | 471.49 | 490.54 |
| intensities | 2.94   | 20.42  | 1.44   | 5.49   | 3.67   | 11.15  |
| reduc. mass | 0.36   | 0.30   | 0.68   | 0.96   | 0.60   | 1.07   |
| force const | 0.03   | 0.03   | 0.06   | 0.11   | 0.08   | 0.15   |

vibration #      25    26    27    28    29    30

-----

|             |        |        |        |        |        |        |
|-------------|--------|--------|--------|--------|--------|--------|
| frequencies | 514.99 | 526.36 | 532.15 | 547.60 | 566.37 | 600.36 |
| intensities | 0.65   | 8.80   | 7.43   | 6.70   | 33.22  | 19.35  |
| reduc. mass | 0.51   | 0.76   | 0.81   | 0.63   | 0.53   | 2.05   |
| force const | 0.08   | 0.12   | 0.13   | 0.11   | 0.10   | 0.43   |

vibration #      31    32    33    34    35    36

-----

|             |        |        |        |        |        |        |
|-------------|--------|--------|--------|--------|--------|--------|
| frequencies | 653.14 | 665.37 | 693.48 | 708.85 | 715.36 | 732.50 |
| intensities | 80.43  | 26.78  | 13.31  | 13.18  | 1.00   | 3.68   |
| reduc. mass | 0.52   | 0.77   | 1.49   | 2.30   | 0.39   | 0.57   |
| force const | 0.13   | 0.20   | 0.42   | 0.68   | 0.12   | 0.18   |

vibration #      37    38    39    40    41    42

-----

|             |        |        |        |        |        |        |
|-------------|--------|--------|--------|--------|--------|--------|
| frequencies | 749.90 | 808.72 | 833.24 | 848.43 | 866.97 | 920.49 |
| intensities | 7.36   | 1.36   | 4.53   | 2.12   | 5.12   | 1.13   |
| reduc. mass | 1.21   | 1.19   | 1.59   | 0.63   | 0.63   | 0.87   |
| force const | 0.40   | 0.46   | 0.65   | 0.27   | 0.28   | 0.43   |

vibration #      43    44    45    46    47    48

-----

|             |        |        |        |        |         |         |
|-------------|--------|--------|--------|--------|---------|---------|
| frequencies | 936.72 | 947.90 | 955.98 | 997.06 | 1012.08 | 1013.23 |
|-------------|--------|--------|--------|--------|---------|---------|

|             |      |      |       |      |      |      |
|-------------|------|------|-------|------|------|------|
| intensities | 7.34 | 1.01 | 17.34 | 3.67 | 5.58 | 4.10 |
| reduc. mass | 0.66 | 0.76 | 0.44  | 0.28 | 0.26 | 0.21 |
| force const | 0.34 | 0.40 | 0.23  | 0.16 | 0.15 | 0.13 |

vibration #      49    50    51    52    53    54

-----

|             |         |         |         |         |         |         |
|-------------|---------|---------|---------|---------|---------|---------|
| frequencies | 1030.67 | 1049.21 | 1054.67 | 1060.39 | 1063.37 | 1093.64 |
| intensities | 20.18   | 12.01   | 6.20    | 20.64   | 24.28   | 13.46   |
| reduc. mass | 0.52    | 0.31    | 0.46    | 0.30    | 0.53    | 0.41    |
| force const | 0.33    | 0.20    | 0.30    | 0.20    | 0.35    | 0.29    |

vibration #      55    56    57    58    59    60

-----

|             |         |         |         |         |         |         |
|-------------|---------|---------|---------|---------|---------|---------|
| frequencies | 1103.40 | 1111.00 | 1137.26 | 1148.18 | 1163.67 | 1224.61 |
| intensities | 42.09   | 95.53   | 7.68    | 44.05   | 5.14    | 29.32   |
| reduc. mass | 0.72    | 0.50    | 0.47    | 0.75    | 0.65    | 0.41    |
| force const | 0.51    | 0.36    | 0.36    | 0.59    | 0.52    | 0.36    |

vibration #      61    62    63    64    65    66

-----

|             |         |         |         |         |         |         |
|-------------|---------|---------|---------|---------|---------|---------|
| frequencies | 1228.67 | 1250.32 | 1255.20 | 1288.33 | 1302.85 | 1320.25 |
| intensities | 57.10   | 31.93   | 65.43   | 29.31   | 54.42   | 81.12   |
| reduc. mass | 0.57    | 0.28    | 0.68    | 0.93    | 0.63    | 0.98    |
| force const | 0.51    | 0.25    | 0.63    | 0.91    | 0.63    | 1.00    |

vibration #      67    68    69    70    71    72

-----

|             |         |         |         |         |         |         |
|-------------|---------|---------|---------|---------|---------|---------|
| frequencies | 1337.86 | 1386.51 | 1401.48 | 1410.79 | 1433.94 | 1473.79 |
| intensities | 40.85   | 85.38   | 110.33  | 443.63  | 90.55   | 17.51   |

|             |      |      |      |      |      |      |
|-------------|------|------|------|------|------|------|
| reduc. mass | 0.90 | 0.61 | 0.36 | 0.64 | 0.54 | 1.61 |
| force const | 0.95 | 0.69 | 0.42 | 0.75 | 0.65 | 2.07 |

vibration #      73    74    75    76    77    78

-----

|             |         |         |         |         |         |         |
|-------------|---------|---------|---------|---------|---------|---------|
| frequencies | 1499.76 | 1510.00 | 1513.68 | 1523.65 | 1528.26 | 1531.71 |
|-------------|---------|---------|---------|---------|---------|---------|

|             |      |       |        |      |       |      |
|-------------|------|-------|--------|------|-------|------|
| intensities | 0.80 | 25.43 | 130.97 | 1.02 | 69.76 | 6.26 |
|-------------|------|-------|--------|------|-------|------|

|             |      |      |      |      |      |      |
|-------------|------|------|------|------|------|------|
| reduc. mass | 0.93 | 2.19 | 1.26 | 2.72 | 0.73 | 0.48 |
|-------------|------|------|------|------|------|------|

|             |      |      |      |      |      |      |
|-------------|------|------|------|------|------|------|
| force const | 1.23 | 2.94 | 1.71 | 3.71 | 1.01 | 0.67 |
|-------------|------|------|------|------|------|------|

vibration #      79    80    81    82    83    84

-----

|             |         |         |         |         |         |         |
|-------------|---------|---------|---------|---------|---------|---------|
| frequencies | 1565.30 | 1581.11 | 1587.62 | 1624.61 | 1638.08 | 1641.91 |
|-------------|---------|---------|---------|---------|---------|---------|

|             |        |       |       |      |       |       |
|-------------|--------|-------|-------|------|-------|-------|
| intensities | 110.26 | 19.56 | 24.11 | 9.43 | 99.92 | 47.35 |
|-------------|--------|-------|-------|------|-------|-------|

|             |      |      |      |      |      |      |
|-------------|------|------|------|------|------|------|
| reduc. mass | 0.76 | 0.63 | 0.42 | 0.44 | 0.20 | 0.35 |
|-------------|------|------|------|------|------|------|

|             |      |      |      |      |      |      |
|-------------|------|------|------|------|------|------|
| force const | 1.10 | 0.92 | 0.62 | 0.69 | 0.31 | 0.55 |
|-------------|------|------|------|------|------|------|

vibration #      85    86    87    88    89    90

-----

|             |         |         |         |         |         |         |
|-------------|---------|---------|---------|---------|---------|---------|
| frequencies | 1651.11 | 1656.37 | 1660.58 | 1662.18 | 1665.04 | 1669.93 |
|-------------|---------|---------|---------|---------|---------|---------|

|             |       |      |       |       |       |      |
|-------------|-------|------|-------|-------|-------|------|
| intensities | 62.42 | 5.93 | 31.90 | 30.15 | 20.69 | 4.64 |
|-------------|-------|------|-------|-------|-------|------|

|             |      |      |      |      |      |      |
|-------------|------|------|------|------|------|------|
| reduc. mass | 0.14 | 0.85 | 0.28 | 0.36 | 0.27 | 0.26 |
|-------------|------|------|------|------|------|------|

|             |      |      |      |      |      |      |
|-------------|------|------|------|------|------|------|
| force const | 0.23 | 1.38 | 0.45 | 0.59 | 0.45 | 0.42 |
|-------------|------|------|------|------|------|------|

vibration #      91    92    93    94    95    96

-----

|             |         |         |         |         |         |         |
|-------------|---------|---------|---------|---------|---------|---------|
| frequencies | 1675.92 | 1678.37 | 1679.52 | 1679.79 | 1683.52 | 1808.57 |
|-------------|---------|---------|---------|---------|---------|---------|

|             |        |       |       |      |       |        |
|-------------|--------|-------|-------|------|-------|--------|
| intensities | 106.06 | 41.11 | 29.71 | 3.88 | 12.82 | 869.62 |
|-------------|--------|-------|-------|------|-------|--------|

|             |      |      |      |      |      |      |
|-------------|------|------|------|------|------|------|
| reduc. mass | 0.56 | 0.21 | 0.14 | 0.16 | 0.28 | 1.60 |
|-------------|------|------|------|------|------|------|

force const 0.93 0.35 0.24 0.27 0.46 3.09

vibration # 97 98 99 100 101 102

-----

frequencies 1837.16 1888.57 3020.26 3028.18 3034.88 3048.97

intensities 377.99 14.50 296.20 537.30 592.61 371.59

reduc. mass 1.37 0.86 0.33 0.16 0.14 0.39

force const 2.73 1.81 1.75 0.88 0.78 2.15

vibration # 103 104 105 106 107 108

-----

frequencies 3060.09 3074.68 3078.03 3088.89 3108.89 3118.67

intensities 534.78 349.03 118.08 248.24 311.50 247.29

reduc. mass 0.30 0.88 0.75 0.77 0.27 0.54

force const 1.66 4.87 4.21 4.33 1.54 3.11

vibration # 109 110 111 112 113 114

-----

frequencies 3123.92 3130.77 3135.84 3145.40 3146.48 3147.59

intensities 343.40 498.32 448.61 429.34 346.32 186.55

reduc. mass 0.50 0.45 0.50 0.21 0.22 0.20

force const 2.88 2.62 2.89 1.25 1.26 1.16

vibration # 115 116 117 118 119 120

-----

frequencies 3154.94 3155.63 3179.13 3196.86 3825.64 3856.43

intensities 403.96 529.07 96.06 334.19 74.43 69.56

reduc. mass 0.31 0.28 0.33 0.52 0.95 0.95

force const 1.84 1.64 1.95 3.12 8.17 8.30

Number of imaginary frequencies: 0

## Conformation 6

Boltzmann Population = 41.4% (relative energy = 0.00 kcal/mol)

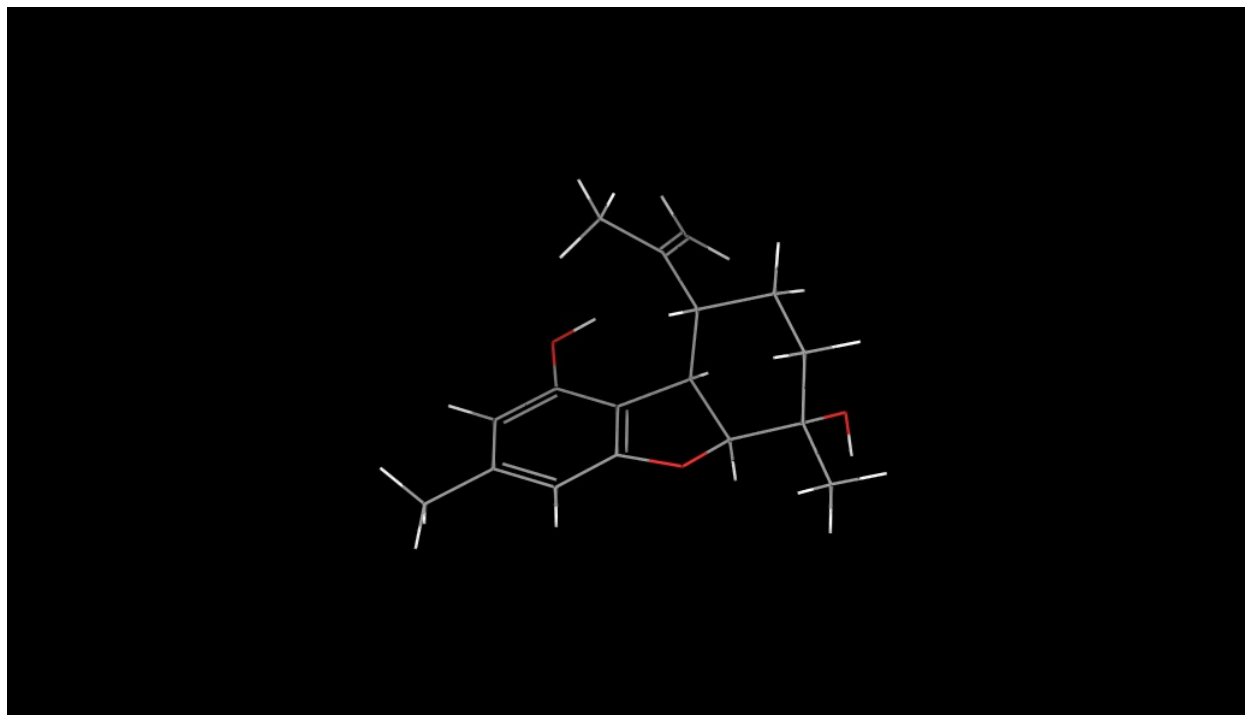

Geometries and Energy Method: M06-2X-D3/6-31G(d,p)

NMR Method: mPW1PW91/6-311+G(2d,p)

Thermodynamic properties for P = 1.00 atm, calculated at 1 temperatures

T = 298.15 K, P = 1.00 atm

Total internal energy,  $U_{\text{tot}}(\text{SCFE} + \text{ZPE} + U)$ : -885.983252 hartrees

Total enthalpy,  $H_{\text{tot}}(U_{\text{tot}} + pV)$ : -885.982308 hartrees

Total Gibbs free energy,  $G_{\text{tot}}(H_{\text{tot}} - T^*S)$ : -886.044598 hartrees

Optimized geometry:

| Center Number | Atomic Number | Atomic Type | Coordinates (Angstroms) |           |           |
|---------------|---------------|-------------|-------------------------|-----------|-----------|
|               |               |             | X                       | Y         | Z         |
| 1             | 6             | 0           | -6.008100               | -0.538700 | -2.669400 |
| 2             | 6             | 0           | -4.530500               | -0.281400 | -2.962800 |
| 3             | 6             | 0           | -3.864200               | -1.584400 | -3.418300 |
| 4             | 6             | 0           | -3.981700               | -2.685700 | -2.336700 |
| 5             | 6             | 0           | -5.410800               | -2.837300 | -1.783000 |

|    |   |   |           |           |           |
|----|---|---|-----------|-----------|-----------|
| 6  | 6 | 0 | -6.185000 | -1.540200 | -1.529600 |
| 7  | 6 | 0 | -7.655800 | -1.835800 | -1.264300 |
| 8  | 6 | 0 | -2.415700 | -1.412400 | -3.845000 |
| 9  | 6 | 0 | -3.834800 | -4.051200 | -2.970900 |
| 10 | 6 | 0 | -5.120800 | -4.532100 | -3.215100 |
| 11 | 6 | 0 | -2.745800 | -4.769300 | -3.450000 |
| 12 | 6 | 0 | -2.975400 | -5.974700 | -4.124600 |
| 13 | 6 | 0 | -4.269700 | -6.442100 | -4.346000 |
| 14 | 6 | 0 | -5.375500 | -5.709300 | -3.893000 |
| 15 | 8 | 0 | -1.460500 | -4.357100 | -3.305600 |
| 16 | 8 | 0 | -6.086300 | -3.692600 | -2.720900 |
| 17 | 8 | 0 | -5.581700 | -0.923200 | -0.393500 |
| 18 | 6 | 0 | -4.482400 | -7.757900 | -5.052900 |
| 19 | 6 | 0 | -2.100200 | -1.771500 | -5.270400 |
| 20 | 6 | 0 | -1.480400 | -0.984100 | -2.990400 |
| 21 | 1 | 0 | -6.505400 | -0.933600 | -3.563700 |
| 22 | 1 | 0 | -6.518000 | 0.386500  | -2.382600 |
| 23 | 1 | 0 | -4.422300 | 0.476900  | -3.745200 |
| 24 | 1 | 0 | -4.039000 | 0.103500  | -2.063000 |
| 25 | 1 | 0 | -4.428800 | -1.945300 | -4.289600 |
| 26 | 1 | 0 | -3.283800 | -2.478500 | -1.519300 |
| 27 | 1 | 0 | -5.355100 | -3.388000 | -0.828300 |
| 28 | 1 | 0 | -8.176600 | -0.908500 | -1.012100 |
| 29 | 1 | 0 | -8.123800 | -2.291400 | -2.139000 |
| 30 | 1 | 0 | -7.762400 | -2.535900 | -0.427200 |
| 31 | 1 | 0 | -2.115800 | -6.532000 | -4.482800 |
| 32 | 1 | 0 | -6.391200 | -6.050700 | -4.058000 |
| 33 | 1 | 0 | -1.448900 | -3.443900 | -2.981100 |
| 34 | 1 | 0 | -5.792300 | -1.456300 | 0.382800  |
| 35 | 1 | 0 | -3.719200 | -7.923800 | -5.817000 |
| 36 | 1 | 0 | -4.428900 | -8.591900 | -4.345600 |
| 37 | 1 | 0 | -5.462800 | -7.793300 | -5.533500 |
| 38 | 1 | 0 | -2.689900 | -1.150300 | -5.954200 |
| 39 | 1 | 0 | -1.041200 | -1.639700 | -5.501600 |
| 40 | 1 | 0 | -2.377000 | -2.814000 | -5.466700 |
| 41 | 1 | 0 | -0.447800 | -0.855800 | -3.301000 |
| 42 | 1 | 0 | -1.722100 | -0.720100 | -1.963900 |

-----

SCF GIAO Magnetic shielding tensor (ppm):

|              |          |             |          |              |          |
|--------------|----------|-------------|----------|--------------|----------|
| 1            | C        | Isotropic = | 150.7318 | Anisotropy = | 20.3115  |
| XX=          | 144.4025 | YX=         | -1.1717  | ZX=          | 1.6644   |
| XY=          | -7.1709  | YY=         | 159.8624 | ZY=          | 6.4984   |
| XZ=          | -3.1305  | YZ=         | 8.3820   | ZZ=          | 147.9306 |
| Eigenvalues: | 142.7729 | 145.1498    | 164.2728 |              |          |
| 2            | C        | Isotropic = | 157.7964 | Anisotropy = | 22.0893  |
| XX=          | 166.4161 | YX=         | -7.0108  | ZX=          | 6.4954   |
| XY=          | -3.0676  | YY=         | 160.8227 | ZY=          | -6.4388  |
| XZ=          | 7.0999   | YZ=         | -6.1598  | ZZ=          | 146.1505 |

|              |             |          |              |          |          |
|--------------|-------------|----------|--------------|----------|----------|
| Eigenvalues: | 142.8058    | 158.0608 | 172.5226     |          |          |
| 3 C          | Isotropic = | 135.8320 | Anisotropy = | 10.4231  |          |
| XX=          | 141.4309    | YX=      | -4.1984      | ZX=      | -0.4463  |
| XY=          | 7.7029      | YY=      | 140.1081     | ZY=      | -4.1254  |
| XZ=          | 6.3122      | YZ=      | -7.5672      | ZZ=      | 125.9568 |
| Eigenvalues: | 123.2354    | 141.4798 | 142.7807     |          |          |
| 4 C          | Isotropic = | 135.2984 | Anisotropy = | 28.8697  |          |
| XX=          | 126.4414    | YX=      | 5.4492       | ZX=      | 1.8969   |
| XY=          | 3.8807      | YY=      | 151.3987     | ZY=      | -3.3826  |
| XZ=          | 7.4689      | YZ=      | 17.4455      | ZZ=      | 128.0551 |
| Eigenvalues: | 122.4534    | 128.8969 | 154.5449     |          |          |
| 5 C          | Isotropic = | 93.8077  | Anisotropy = | 55.7736  |          |
| XX=          | 117.1413    | YX=      | 10.6470      | ZX=      | -20.2736 |
| XY=          | 0.3793      | YY=      | 84.6059      | ZY=      | -20.7601 |
| XZ=          | -24.5553    | YZ=      | -12.9470     | ZZ=      | 79.6760  |
| Eigenvalues: | 61.2750     | 89.1580  | 130.9901     |          |          |
| 6 C          | Isotropic = | 116.3215 | Anisotropy = | 53.0090  |          |
| XX=          | 118.0769    | YX=      | 8.3309       | ZX=      | -26.2986 |
| XY=          | 6.3311      | YY=      | 107.5860     | ZY=      | -12.7957 |
| XZ=          | -24.4627    | YZ=      | -15.6120     | ZZ=      | 123.3015 |
| Eigenvalues: | 93.4481     | 103.8555 | 151.6608     |          |          |
| 7 C          | Isotropic = | 157.5827 | Anisotropy = | 45.0814  |          |
| XX=          | 142.0945    | YX=      | -12.0793     | ZX=      | 0.6310   |
| XY=          | -8.2999     | YY=      | 184.6803     | ZY=      | -5.2990  |
| XZ=          | 0.1800      | YZ=      | -5.1398      | ZZ=      | 145.9734 |
| Eigenvalues: | 139.6811    | 145.4300 | 187.6370     |          |          |
| 8 C          | Isotropic = | 16.8070  | Anisotropy = | 212.5285 |          |
| XX=          | 42.3345     | YX=      | 82.0505      | ZX=      | 101.2864 |
| XY=          | 84.0022     | YY=      | -26.9393     | ZY=      | -5.0861  |
| XZ=          | 96.9523     | YZ=      | 3.4360       | ZZ=      | 35.0258  |
| Eigenvalues: | -109.8143   | 1.7427   | 158.4927     |          |          |
| 9 C          | Isotropic = | 68.3533  | Anisotropy = | 110.4661 |          |
| XX=          | 22.1158     | YX=      | -0.1874      | ZX=      | 8.1954   |
| XY=          | -16.1560    | YY=      | 62.3881      | ZY=      | 38.8437  |
| XZ=          | 15.6726     | YZ=      | 42.8100      | ZZ=      | 120.5560 |
| Eigenvalues: | 15.4766     | 47.5859  | 141.9973     |          |          |
| 10 C         | Isotropic = | 20.6697  | Anisotropy = | 109.4695 |          |
| XX=          | -32.9708    | YX=      | 32.2433      | ZX=      | -4.9079  |
| XY=          | 43.8546     | YY=      | 12.8073      | ZY=      | 35.3793  |
| XZ=          | -16.4067    | YZ=      | 25.2227      | ZZ=      | 82.1726  |
| Eigenvalues: | -58.7828    | 27.1425  | 93.6494      |          |          |
| 11 C         | Isotropic = | 27.8218  | Anisotropy = | 135.8125 |          |
| XX=          | 14.8135     | YX=      | -6.4728      | ZX=      | 9.6410   |
| XY=          | 0.5065      | YY=      | -26.2665     | ZY=      | 61.3597  |
| XZ=          | 5.7699      | YZ=      | 54.0791      | ZZ=      | 94.9184  |
| Eigenvalues: | -49.8500    | 14.9520  | 118.3634     |          |          |
| 12 C         | Isotropic = | 74.4502  | Anisotropy = | 119.7983 |          |
| XX=          | 19.3315     | YX=      | 28.0171      | ZX=      | -3.3577  |
| XY=          | 40.6991     | YY=      | 61.3072      | ZY=      | 38.2882  |
| XZ=          | -6.7721     | YZ=      | 26.3148      | ZZ=      | 142.7118 |
| Eigenvalues: | -2.9109     | 71.9457  | 154.3157     |          |          |
| 13 C         | Isotropic = | 41.2810  | Anisotropy = | 193.7540 |          |



|              |             |          |              |     |          |          |
|--------------|-------------|----------|--------------|-----|----------|----------|
| XX=          | -41.3722    | YX=      | -16.4601     | ZX= | 20.3882  |          |
| XY=          | -18.8872    | YY=      | 29.2994      | ZY= | 66.4127  |          |
| XZ=          | 28.5426     | YZ=      | 70.7707      | ZZ= | 135.9159 |          |
| Eigenvalues: | -55.9784    |          | 9.3711       |     | 170.4504 |          |
| 14 C         | Isotropic = | 81.0701  | Anisotropy = |     |          | 118.2327 |
| XX=          | 76.5406     | YX=      | 8.5783       | ZX= | 2.1664   |          |
| XY=          | -6.3374     | YY=      | 32.2329      | ZY= | 59.6442  |          |
| XZ=          | 1.2704      | YZ=      | 54.2338      | ZZ= | 134.4366 |          |
| Eigenvalues: | 6.8255      |          | 76.4929      |     | 159.8919 |          |
| 15 O         | Isotropic = | 202.8541 | Anisotropy = |     |          | 76.2079  |
| XX=          | 147.0289    | YX=      | 12.3294      | ZX= | -0.0912  |          |
| XY=          | 6.0680      | YY=      | 210.7244     | ZY= | 11.0274  |          |
| XZ=          | 23.5322     | YZ=      | -29.2768     | ZZ= | 250.8089 |          |
| Eigenvalues: | 144.1589    |          | 210.7440     |     | 253.6593 |          |
| 16 O         | Isotropic = | 185.1597 | Anisotropy = |     |          | 111.4585 |
| XX=          | 219.9163    | YX=      | -59.2466     | ZX= | 34.2889  |          |
| XY=          | -42.9511    | YY=      | 148.9566     | ZY= | 32.5390  |          |
| XZ=          | 32.6213     | YZ=      | -35.1346     | ZZ= | 186.6062 |          |
| Eigenvalues: | 118.8279    |          | 177.1858     |     | 259.4654 |          |
| 17 O         | Isotropic = | 244.0193 | Anisotropy = |     |          | 66.8163  |
| XX=          | 225.0180    | YX=      | 10.4561      | ZX= | -6.1564  |          |
| XY=          | 11.2197     | YY=      | 224.6959     | ZY= | 21.5940  |          |
| XZ=          | -21.9855    | YZ=      | 10.9539      | ZZ= | 282.3441 |          |
| Eigenvalues: | 207.8272    |          | 235.6673     |     | 288.5636 |          |
| 18 C         | Isotropic = | 163.8245 | Anisotropy = |     |          | 41.3368  |
| XX=          | 183.5806    | YX=      | 10.7827      | ZX= | -12.4792 |          |
| XY=          | 12.4814     | YY=      | 160.0542     | ZY= | -11.1444 |          |
| XZ=          | -4.7383     | YZ=      | -6.8256      | ZZ= | 147.8387 |          |
| Eigenvalues: | 142.9321    |          | 157.1591     |     | 191.3824 |          |
| 19 C         | Isotropic = | 157.9363 | Anisotropy = |     |          | 42.5616  |
| XX=          | 158.8621    | YX=      | -15.4742     | ZX= | -17.2884 |          |
| XY=          | -12.1701    | YY=      | 159.7247     | ZY= | 8.8072   |          |
| XZ=          | -18.9679    | YZ=      | 11.6738      | ZZ= | 155.2222 |          |
| Eigenvalues: | 138.6081    |          | 148.8901     |     | 186.3107 |          |
| 20 C         | Isotropic = | 72.1289  | Anisotropy = |     |          | 131.1515 |
| XX=          | 88.6283     | YX=      | 76.8692      | ZX= | 48.9183  |          |
| XY=          | 73.3836     | YY=      | 25.4489      | ZY= | -15.6382 |          |
| XZ=          | 49.9092     | YZ=      | -18.4472     | ZZ= | 102.3093 |          |
| Eigenvalues: | -37.3426    |          | 94.1660      |     | 159.5632 |          |
| 21 H         | Isotropic = | 30.2441  | Anisotropy = |     |          | 6.2210   |
| XX=          | 27.4535     | YX=      | -0.9283      | ZX= | -0.8246  |          |
| XY=          | 0.1570      | YY=      | 29.4561      | ZY= | -1.6097  |          |
| XZ=          | 0.4580      | YZ=      | -1.7399      | ZZ= | 33.8227  |          |
| Eigenvalues: | 27.3372     |          | 29.0037      |     | 34.3914  |          |
| 22 H         | Isotropic = | 30.0073  | Anisotropy = |     |          | 8.8909   |
| XX=          | 33.6975     | YX=      | -2.0262      | ZX= | 3.8459   |          |
| XY=          | -1.7683     | YY=      | 29.1238      | ZY= | 0.4953   |          |
| XZ=          | 4.0760      | YZ=      | 0.2395       | ZZ= | 27.2008  |          |
| Eigenvalues: | 24.9915     |          | 29.0960      |     | 35.9346  |          |
| 23 H         | Isotropic = | 30.4389  | Anisotropy = |     |          | 9.5140   |
| XX=          | 30.0525     | YX=      | 0.7232       | ZX= | 3.9097   |          |
| XY=          | 1.0903      | YY=      | 31.3331      | ZY= | 4.4730   |          |

|              |             |         |              |         |         |  |
|--------------|-------------|---------|--------------|---------|---------|--|
| XZ=          | 4.3185      | YZ=     | 4.0286       | ZZ=     | 29.9312 |  |
| Eigenvalues: | 24.7679     |         | 29.7674      |         | 36.7816 |  |
| 24 H         | Isotropic = | 29.7989 | Anisotropy = | 5.9477  |         |  |
| XX=          | 30.5253     | YX=     | 1.1890       | ZX=     | -2.7691 |  |
| XY=          | 1.4919      | YY=     | 31.6640      | ZY=     | -2.0410 |  |
| XZ=          | -1.8403     | YZ=     | -1.5638      | ZZ=     | 27.2074 |  |
| Eigenvalues: | 25.8347     |         | 29.7979      |         | 33.7640 |  |
| 25 H         | Isotropic = | 30.1068 | Anisotropy = | 3.8612  |         |  |
| XX=          | 30.6548     | YX=     | -1.8009      | ZX=     | -2.3142 |  |
| XY=          | -0.2856     | YY=     | 29.7693      | ZY=     | 0.5259  |  |
| XZ=          | -0.0107     | YZ=     | 2.7618       | ZZ=     | 29.8964 |  |
| Eigenvalues: | 28.1861     |         | 29.4535      |         | 32.6809 |  |
| 26 H         | Isotropic = | 28.5368 | Anisotropy = | 4.3769  |         |  |
| XX=          | 27.3277     | YX=     | -0.1022      | ZX=     | 0.0266  |  |
| XY=          | -1.8486     | YY=     | 29.0828      | ZY=     | -2.0647 |  |
| XZ=          | -0.9463     | YZ=     | -2.4974      | ZZ=     | 29.1997 |  |
| Eigenvalues: | 26.0387     |         | 28.1169      |         | 31.4547 |  |
| 27 H         | Isotropic = | 27.9439 | Anisotropy = | 4.8050  |         |  |
| XX=          | 27.1945     | YX=     | 0.6750       | ZX=     | -1.2891 |  |
| XY=          | -0.7690     | YY=     | 27.9835      | ZY=     | 0.8067  |  |
| XZ=          | -3.5722     | YZ=     | 2.6905       | ZZ=     | 28.6538 |  |
| Eigenvalues: | 24.9987     |         | 27.6859      |         | 31.1473 |  |
| 28 H         | Isotropic = | 30.5168 | Anisotropy = | 9.0632  |         |  |
| XX=          | 33.5338     | YX=     | -3.1093      | ZX=     | 1.8264  |  |
| XY=          | -4.3899     | YY=     | 30.8297      | ZY=     | -0.7110 |  |
| XZ=          | 2.0002      | YZ=     | -0.4885      | ZZ=     | 27.1869 |  |
| Eigenvalues: | 26.5772     |         | 28.4143      |         | 36.5590 |  |
| 29 H         | Isotropic = | 29.9765 | Anisotropy = | 8.3836  |         |  |
| XX=          | 28.9740     | YX=     | 0.0348       | ZX=     | -1.8442 |  |
| XY=          | 0.5456      | YY=     | 32.1640      | ZY=     | -4.8022 |  |
| XZ=          | -1.8320     | YZ=     | -4.2487      | ZZ=     | 28.7914 |  |
| Eigenvalues: | 25.1541     |         | 29.2097      |         | 35.5655 |  |
| 30 H         | Isotropic = | 30.8405 | Anisotropy = | 8.9663  |         |  |
| XX=          | 28.4609     | YX=     | -0.9631      | ZX=     | -0.1448 |  |
| XY=          | -0.7818     | YY=     | 34.8995      | ZY=     | 4.3305  |  |
| XZ=          | -0.0047     | YZ=     | 3.1350       | ZZ=     | 29.1611 |  |
| Eigenvalues: | 27.2345     |         | 28.4689      |         | 36.8181 |  |
| 31 H         | Isotropic = | 25.2584 | Anisotropy = | 6.9009  |         |  |
| XX=          | 26.9646     | YX=     | 2.4840       | ZX=     | -1.0410 |  |
| XY=          | 2.5268      | YY=     | 26.3914      | ZY=     | -2.3135 |  |
| XZ=          | -0.7633     | YZ=     | -2.2234      | ZZ=     | 22.4193 |  |
| Eigenvalues: | 21.3800     |         | 24.5362      |         | 29.8590 |  |
| 32 H         | Isotropic = | 25.3925 | Anisotropy = | 7.2456  |         |  |
| XX=          | 30.0305     | YX=     | 0.5218       | ZX=     | -0.7686 |  |
| XY=          | 0.9750      | YY=     | 24.2472      | ZY=     | -1.3366 |  |
| XZ=          | -0.6289     | YZ=     | -1.6526      | ZZ=     | 21.8999 |  |
| Eigenvalues: | 21.1627     |         | 24.7919      |         | 30.2230 |  |
| 33 H         | Isotropic = | 26.3820 | Anisotropy = | 17.1454 |         |  |
| XX=          | 35.1996     | YX=     | 4.3309       | ZX=     | 3.4812  |  |
| XY=          | 6.1823      | YY=     | 26.1427      | ZY=     | -2.6675 |  |
| XZ=          | 2.2571      | YZ=     | -0.2893      | ZZ=     | 17.8038 |  |
| Eigenvalues: | 16.6974     |         | 24.6364      |         | 37.8123 |  |

|              |         |             |         |              |         |
|--------------|---------|-------------|---------|--------------|---------|
| 34           | H       | Isotropic = | 31.8068 | Anisotropy = | 16.4417 |
| XX=          | 27.0866 | YX=         | 0.4294  | ZX=          | -4.5672 |
| XY=          | -0.3407 | YY=         | 29.6988 | ZY=          | 5.7124  |
| XZ=          | -4.0003 | YZ=         | 6.7570  | ZZ=          | 38.6350 |
| Eigenvalues: | 24.3800 |             | 28.2724 |              | 42.7680 |
| 35           | H       | Isotropic = | 29.5858 | Anisotropy = | 8.0538  |
| XX=          | 33.1532 | YX=         | -2.8201 | ZX=          | -2.5616 |
| XY=          | -1.1071 | YY=         | 29.7335 | ZY=          | -0.2366 |
| XZ=          | -3.7019 | YZ=         | 0.1102  | ZZ=          | 25.8708 |
| Eigenvalues: | 24.5945 |             | 29.2080 |              | 34.9550 |
| 36           | H       | Isotropic = | 29.3194 | Anisotropy = | 9.1628  |
| XX=          | 31.0336 | YX=         | 3.2349  | ZX=          | 2.4839  |
| XY=          | 3.8767  | YY=         | 28.8095 | ZY=          | 1.6703  |
| XZ=          | 3.5751  | YZ=         | 2.2688  | ZZ=          | 28.1151 |
| Eigenvalues: | 26.0665 |             | 26.4638 |              | 35.4279 |
| 37           | H       | Isotropic = | 29.7561 | Anisotropy = | 7.7114  |
| XX=          | 30.3136 | YX=         | 2.1221  | ZX=          | -1.8961 |
| XY=          | 0.0305  | YY=         | 29.8918 | ZY=          | -4.5934 |
| XZ=          | -0.9172 | YZ=         | -4.8801 | ZZ=          | 29.0630 |
| Eigenvalues: | 24.7044 |             | 29.6669 |              | 34.8971 |
| 38           | H       | Isotropic = | 30.0408 | Anisotropy = | 7.9947  |
| XX=          | 27.3940 | YX=         | -0.7979 | ZX=          | 0.7091  |
| XY=          | -1.0595 | YY=         | 28.3935 | ZY=          | 2.7844  |
| XZ=          | 1.1443  | YZ=         | 2.4807  | ZZ=          | 34.3350 |
| Eigenvalues: | 26.1816 |             | 28.5703 |              | 35.3706 |
| 39           | H       | Isotropic = | 29.9846 | Anisotropy = | 8.7650  |
| XX=          | 28.2135 | YX=         | -3.7602 | ZX=          | -0.7111 |
| XY=          | -2.1772 | YY=         | 34.3112 | ZY=          | -0.1064 |
| XZ=          | -1.3586 | YZ=         | 2.7449  | ZZ=          | 27.4291 |
| Eigenvalues: | 26.6057 |             | 27.5201 |              | 35.8280 |
| 40           | H       | Isotropic = | 30.0084 | Anisotropy = | 5.6581  |
| XX=          | 32.2579 | YX=         | 2.3756  | ZX=          | -1.4049 |
| XY=          | 1.8416  | YY=         | 30.1565 | ZY=          | 2.2932  |
| XZ=          | -0.2799 | YZ=         | 4.0466  | ZZ=          | 27.6107 |
| Eigenvalues: | 24.9682 |             | 31.2765 |              | 33.7804 |
| 41           | H       | Isotropic = | 26.3537 | Anisotropy = | 5.5380  |
| XX=          | 25.2703 | YX=         | 3.0665  | ZX=          | -1.1159 |
| XY=          | 1.1276  | YY=         | 27.5063 | ZY=          | -1.2352 |
| XZ=          | 0.1939  | YZ=         | -3.2653 | ZZ=          | 26.2844 |
| Eigenvalues: | 23.6687 |             | 25.3467 |              | 30.0457 |
| 42           | H       | Isotropic = | 26.3188 | Anisotropy = | 8.1778  |
| XX=          | 24.9027 | YX=         | 0.7174  | ZX=          | 0.3536  |
| XY=          | 3.3285  | YY=         | 28.2549 | ZY=          | -5.9637 |
| XZ=          | -0.7422 | YZ=         | -2.2696 | ZZ=          | 25.7987 |
| Eigenvalues: | 22.2523 |             | 24.9334 |              | 31.7706 |

Number of frequencies: 120

harmonic frequencies in  $\text{cm}^{-1}$ , reduced masses in amu,

force constants in mDyne/A, and

normal modes in cartesian coordinates: 120

IR intensities in  $\text{km/mol}$

vibration # 1 2 3 4 5 6

-----  
frequencies 52.11 69.59 85.61 98.93 125.11 152.41

intensities 1.33 2.60 0.02 3.09 1.76 7.30

reduc. mass 1.49 0.97 1.23 1.51 0.93 0.27

force const 0.00 0.00 0.01 0.01 0.01 0.00

vibration # 7 8 9 10 11 12

-----  
frequencies 173.97 191.72 225.59 246.52 251.59 257.65

intensities 2.48 2.98 1.27 0.56 2.68 3.70

reduc. mass 0.38 0.68 1.47 0.72 0.91 0.90

force const 0.01 0.01 0.04 0.03 0.03 0.04

vibration # 13 14 15 16 17 18

-----  
frequencies 275.93 302.06 303.83 315.30 327.71 332.02

intensities 1.27 0.46 5.40 1.74 0.29 6.24

reduc. mass 0.78 0.51 1.79 0.27 0.20 1.40

force const 0.04 0.03 0.10 0.02 0.01 0.09

vibration # 19 20 21 22 23 24

-----

|             |        |        |        |        |        |        |
|-------------|--------|--------|--------|--------|--------|--------|
| frequencies | 364.94 | 397.73 | 425.93 | 459.89 | 485.43 | 501.00 |
|-------------|--------|--------|--------|--------|--------|--------|

|             |      |      |       |      |      |       |
|-------------|------|------|-------|------|------|-------|
| intensities | 0.51 | 3.10 | 13.15 | 1.57 | 3.21 | 13.93 |
|-------------|------|------|-------|------|------|-------|

|             |      |      |      |      |      |      |
|-------------|------|------|------|------|------|------|
| reduc. mass | 0.69 | 0.76 | 0.62 | 0.59 | 0.62 | 0.54 |
|-------------|------|------|------|------|------|------|

|             |      |      |      |      |      |      |
|-------------|------|------|------|------|------|------|
| force const | 0.05 | 0.07 | 0.07 | 0.07 | 0.09 | 0.08 |
|-------------|------|------|------|------|------|------|

|             |    |    |    |    |    |    |
|-------------|----|----|----|----|----|----|
| vibration # | 25 | 26 | 27 | 28 | 29 | 30 |
|-------------|----|----|----|----|----|----|

-----

|             |        |        |        |        |        |        |
|-------------|--------|--------|--------|--------|--------|--------|
| frequencies | 521.13 | 534.04 | 547.45 | 554.70 | 568.37 | 598.84 |
|-------------|--------|--------|--------|--------|--------|--------|

|             |       |       |       |       |       |       |
|-------------|-------|-------|-------|-------|-------|-------|
| intensities | 19.50 | 13.92 | 10.59 | 19.25 | 66.84 | 20.28 |
|-------------|-------|-------|-------|-------|-------|-------|

|             |      |      |      |      |      |      |
|-------------|------|------|------|------|------|------|
| reduc. mass | 1.29 | 0.78 | 0.77 | 0.37 | 0.58 | 2.31 |
|-------------|------|------|------|------|------|------|

|             |      |      |      |      |      |      |
|-------------|------|------|------|------|------|------|
| force const | 0.21 | 0.13 | 0.14 | 0.07 | 0.11 | 0.49 |
|-------------|------|------|------|------|------|------|

|             |    |    |    |    |    |    |
|-------------|----|----|----|----|----|----|
| vibration # | 31 | 32 | 33 | 34 | 35 | 36 |
|-------------|----|----|----|----|----|----|

-----

|             |        |        |        |        |        |        |
|-------------|--------|--------|--------|--------|--------|--------|
| frequencies | 654.74 | 667.72 | 696.09 | 712.75 | 716.96 | 743.08 |
|-------------|--------|--------|--------|--------|--------|--------|

|             |       |       |      |       |      |      |
|-------------|-------|-------|------|-------|------|------|
| intensities | 83.73 | 30.85 | 4.48 | 13.11 | 0.92 | 0.92 |
|-------------|-------|-------|------|-------|------|------|

|             |      |      |      |      |      |      |
|-------------|------|------|------|------|------|------|
| reduc. mass | 0.50 | 0.68 | 0.91 | 1.62 | 0.35 | 0.91 |
|-------------|------|------|------|------|------|------|

|             |      |      |      |      |      |      |
|-------------|------|------|------|------|------|------|
| force const | 0.13 | 0.18 | 0.26 | 0.49 | 0.11 | 0.29 |
|-------------|------|------|------|------|------|------|

|             |    |    |    |    |    |    |
|-------------|----|----|----|----|----|----|
| vibration # | 37 | 38 | 39 | 40 | 41 | 42 |
|-------------|----|----|----|----|----|----|

-----

|             |        |        |        |        |        |        |
|-------------|--------|--------|--------|--------|--------|--------|
| frequencies | 750.20 | 803.05 | 832.33 | 847.59 | 869.13 | 922.47 |
|-------------|--------|--------|--------|--------|--------|--------|

|             |      |      |      |      |      |      |
|-------------|------|------|------|------|------|------|
| intensities | 7.22 | 2.84 | 2.80 | 1.90 | 7.41 | 1.18 |
|-------------|------|------|------|------|------|------|

|             |      |      |      |      |      |      |
|-------------|------|------|------|------|------|------|
| reduc. mass | 0.77 | 1.22 | 1.51 | 0.64 | 0.62 | 0.90 |
|-------------|------|------|------|------|------|------|

|             |      |      |      |      |      |      |
|-------------|------|------|------|------|------|------|
| force const | 0.26 | 0.46 | 0.62 | 0.27 | 0.28 | 0.45 |
|-------------|------|------|------|------|------|------|

|             |    |    |    |    |    |    |
|-------------|----|----|----|----|----|----|
| vibration # | 43 | 44 | 45 | 46 | 47 | 48 |
|-------------|----|----|----|----|----|----|

-----

|             |        |        |        |         |         |         |
|-------------|--------|--------|--------|---------|---------|---------|
| frequencies | 933.71 | 936.66 | 958.30 | 1000.24 | 1006.69 | 1016.85 |
|-------------|--------|--------|--------|---------|---------|---------|

|             |      |      |       |       |      |      |
|-------------|------|------|-------|-------|------|------|
| intensities | 1.22 | 9.30 | 15.05 | 15.44 | 8.17 | 0.39 |
| reduc. mass | 0.79 | 0.59 | 0.28  | 0.25  | 0.28 | 0.24 |
| force const | 0.41 | 0.31 | 0.15  | 0.15  | 0.17 | 0.15 |

vibration #      49    50    51    52    53    54

-----

|             |         |         |         |         |         |         |
|-------------|---------|---------|---------|---------|---------|---------|
| frequencies | 1027.71 | 1046.84 | 1053.75 | 1058.48 | 1067.33 | 1095.47 |
| intensities | 24.21   | 35.21   | 8.58    | 5.36    | 13.47   | 36.53   |
| reduc. mass | 0.50    | 0.33    | 0.26    | 0.35    | 0.48    | 0.61    |
| force const | 0.31    | 0.21    | 0.17    | 0.23    | 0.32    | 0.43    |

vibration #      55    56    57    58    59    60

-----

|             |         |         |         |         |         |         |
|-------------|---------|---------|---------|---------|---------|---------|
| frequencies | 1106.90 | 1123.05 | 1131.11 | 1150.14 | 1164.86 | 1204.41 |
| intensities | 23.28   | 58.93   | 7.48    | 25.05   | 31.24   | 84.22   |
| reduc. mass | 0.54    | 0.50    | 0.40    | 0.51    | 0.57    | 0.56    |
| force const | 0.39    | 0.37    | 0.30    | 0.40    | 0.46    | 0.48    |

vibration #      61    62    63    64    65    66

-----

|             |         |         |         |         |         |         |
|-------------|---------|---------|---------|---------|---------|---------|
| frequencies | 1226.55 | 1245.26 | 1252.66 | 1270.64 | 1303.77 | 1342.02 |
| intensities | 19.99   | 38.93   | 80.64   | 21.24   | 30.36   | 10.42   |
| reduc. mass | 0.59    | 0.24    | 1.17    | 0.26    | 0.66    | 2.56    |
| force const | 0.52    | 0.22    | 1.08    | 0.25    | 0.66    | 2.72    |

vibration #      67    68    69    70    71    72

-----

|             |         |         |         |         |         |         |
|-------------|---------|---------|---------|---------|---------|---------|
| frequencies | 1352.29 | 1380.64 | 1401.82 | 1411.52 | 1435.67 | 1474.44 |
| intensities | 106.86  | 122.84  | 107.76  | 430.18  | 86.98   | 14.07   |

|             |      |      |      |      |      |      |
|-------------|------|------|------|------|------|------|
| reduc. mass | 0.40 | 0.56 | 0.37 | 0.74 | 0.59 | 1.35 |
| force const | 0.43 | 0.62 | 0.42 | 0.87 | 0.71 | 1.72 |

vibration #      73    74    75    76    77    78

-----

|             |         |         |         |         |         |         |
|-------------|---------|---------|---------|---------|---------|---------|
| frequencies | 1500.20 | 1509.98 | 1513.16 | 1520.86 | 1532.64 | 1537.93 |
| intensities | 1.86    | 18.01   | 153.58  | 1.42    | 17.94   | 30.09   |
| reduc. mass | 0.91    | 2.27    | 1.55    | 2.89    | 0.78    | 0.56    |
| force const | 1.20    | 3.05    | 2.08    | 3.93    | 1.08    | 0.78    |

vibration #      79    80    81    82    83    84

-----

|             |         |         |         |         |         |         |
|-------------|---------|---------|---------|---------|---------|---------|
| frequencies | 1559.97 | 1578.66 | 1591.59 | 1632.17 | 1633.05 | 1641.43 |
| intensities | 119.84  | 29.13   | 15.75   | 3.19    | 116.12  | 15.13   |
| reduc. mass | 0.82    | 0.58    | 0.54    | 0.64    | 0.42    | 0.47    |
| force const | 1.18    | 0.85    | 0.80    | 1.00    | 0.67    | 0.75    |

vibration #      85    86    87    88    89    90

-----

|             |         |         |         |         |         |         |
|-------------|---------|---------|---------|---------|---------|---------|
| frequencies | 1650.87 | 1656.69 | 1659.67 | 1662.84 | 1664.57 | 1667.57 |
| intensities | 34.34   | 3.89    | 59.63   | 26.34   | 30.03   | 8.83    |
| reduc. mass | 0.96    | 0.13    | 0.21    | 0.18    | 0.22    | 0.21    |
| force const | 1.53    | 0.21    | 0.34    | 0.29    | 0.35    | 0.35    |

vibration #      91    92    93    94    95    96

-----

|             |         |         |         |         |         |         |
|-------------|---------|---------|---------|---------|---------|---------|
| frequencies | 1670.16 | 1672.56 | 1673.65 | 1683.65 | 1690.75 | 1802.06 |
| intensities | 13.71   | 15.40   | 16.24   | 61.34   | 29.03   | 856.47  |
| reduc. mass | 0.18    | 0.13    | 0.16    | 0.67    | 0.25    | 1.58    |

force const 0.29 0.22 0.26 1.11 0.41 3.02

vibration # 97 98 99 100 101 102

-----

frequencies 1832.61 1888.87 3020.44 3024.28 3031.13 3051.04

intensities 387.23 16.69 297.03 407.43 718.53 649.94

reduc. mass 1.32 0.86 0.32 0.26 0.25 0.80

force const 2.62 1.81 1.75 1.38 1.35 4.37

vibration # 103 104 105 106 107 108

-----

frequencies 3056.27 3062.75 3076.07 3094.15 3102.37 3124.37

intensities 352.17 497.94 102.49 601.56 14.69 310.72

reduc. mass 0.32 0.34 0.81 0.38 0.69 0.53

force const 1.73 1.89 4.50 2.14 3.90 3.02

vibration # 109 110 111 112 113 114

-----

frequencies 3128.34 3131.86 3133.95 3136.48 3145.81 3146.91

intensities 398.61 370.81 221.17 589.13 455.40 14.94

reduc. mass 0.36 0.34 0.44 0.45 0.32 0.30

force const 2.08 1.96 2.55 2.62 1.86 1.77

vibration # 115 116 117 118 119 120

-----

frequencies 3152.70 3155.05 3163.51 3195.69 3821.11 3849.77

intensities 513.75 361.51 287.95 318.53 100.44 88.02

reduc. mass 0.69 0.48 0.67 0.56 0.94 0.94

force const 4.04 2.81 3.96 3.37 8.13 8.25



Number of imaginary frequencies: 0

4. DFT calculation data for CBE with alternate configuration at C1 (**8**). Energies, optimized geometries, NMR shielding values and IR frequencies from calculations performed at the mPW1PW91/6-311+G(2d,p)//M06-2X-D3/6-31G(d,p) level.

Conformation 1

Boltzmann Population = 2.8% (relative energy = 1.71 kcal/mol)

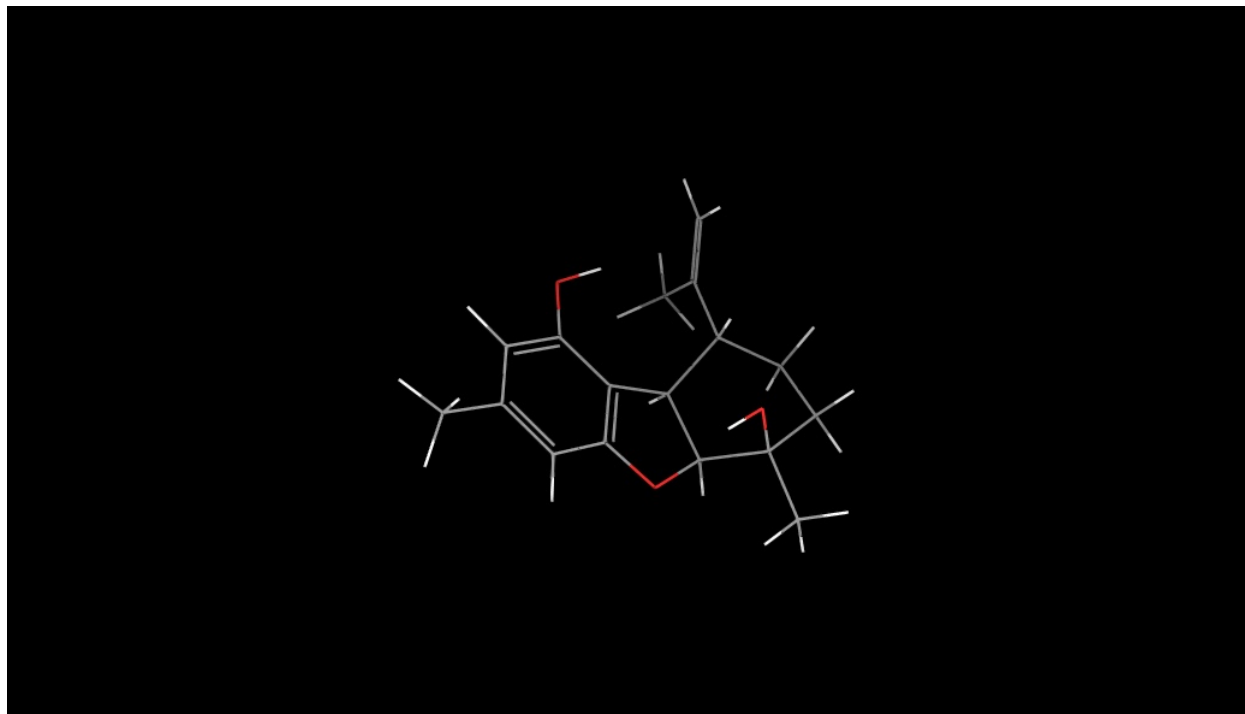

Geometries and Energy Method: M06-2X-D3/6-31G(d,p)

NMR Method: mPW1PW91/6-311+G(2d,p)

Thermodynamic properties for P = 1.00 atm, calculated at 1 temperatures

T = 298.15 K, P = 1.00 atm

Total internal energy, Utot(SCFE + ZPE + U): -885.981775 hartrees

Total enthalpy, Htot (Utot + pV): -885.980831 hartrees

Total Gibbs free energy, Gtot (Htot - T\*S): -886.043945 hartrees

Optimized Geometry:

```

-----
Center      Atomic      Atomic      Coordinates (Angstroms)
Number      Number      Type        X           Y           Z
-----
```

|    |   |   |            |           |           |
|----|---|---|------------|-----------|-----------|
| 1  | 6 | 0 | -3.608400  | 1.672500  | 0.840200  |
| 2  | 6 | 0 | -3.419500  | 1.580600  | 2.363500  |
| 3  | 6 | 0 | -4.753100  | 1.313000  | 3.085100  |
| 4  | 6 | 0 | -5.642800  | 2.562000  | 2.900700  |
| 5  | 6 | 0 | -5.587100  | 3.122800  | 1.441200  |
| 6  | 6 | 0 | -5.006400  | 2.141900  | 0.413400  |
| 7  | 6 | 0 | -4.972500  | 2.773100  | -0.977100 |
| 8  | 6 | 0 | -4.506300  | 0.957200  | 4.537300  |
| 9  | 6 | 0 | -7.135600  | 2.409400  | 3.110000  |
| 10 | 6 | 0 | -7.793700  | 2.947600  | 2.007600  |
| 11 | 6 | 0 | -7.914500  | 1.951900  | 4.171100  |
| 12 | 6 | 0 | -9.309900  | 2.040800  | 4.086200  |
| 13 | 6 | 0 | -9.938100  | 2.574300  | 2.965500  |
| 14 | 6 | 0 | -9.167500  | 3.042600  | 1.894200  |
| 15 | 8 | 0 | -7.404300  | 1.452800  | 5.327900  |
| 16 | 8 | 0 | -6.941300  | 3.405400  | 1.041700  |
| 17 | 8 | 0 | -5.832600  | 0.982800  | 0.386100  |
| 18 | 6 | 0 | -11.442700 | 2.621200  | 2.879900  |
| 19 | 6 | 0 | -4.049600  | 2.044600  | 5.477900  |
| 20 | 6 | 0 | -4.683000  | -0.299200 | 4.961900  |
| 21 | 1 | 0 | -2.854000  | 2.340000  | 0.412100  |
| 22 | 1 | 0 | -3.469800  | 0.691300  | 0.376100  |
| 23 | 1 | 0 | -3.000000  | 2.521400  | 2.744000  |
| 24 | 1 | 0 | -2.698500  | 0.795400  | 2.608800  |
| 25 | 1 | 0 | -5.242900  | 0.465000  | 2.597800  |
| 26 | 1 | 0 | -5.258400  | 3.341500  | 3.572200  |
| 27 | 1 | 0 | -5.031600  | 4.066300  | 1.399200  |
| 28 | 1 | 0 | -4.344300  | 3.668600  | -0.992600 |
| 29 | 1 | 0 | -4.572500  | 2.049900  | -1.692600 |
| 30 | 1 | 0 | -5.981400  | 3.056800  | -1.288600 |
| 31 | 1 | 0 | -9.888600  | 1.672800  | 4.927000  |
| 32 | 1 | 0 | -9.620700  | 3.477200  | 1.010400  |
| 33 | 1 | 0 | -6.547100  | 1.030400  | 5.165600  |
| 34 | 1 | 0 | -6.732700  | 1.287100  | 0.204200  |
| 35 | 1 | 0 | -11.898800 | 2.545000  | 3.868900  |
| 36 | 1 | 0 | -11.781800 | 3.550600  | 2.414600  |
| 37 | 1 | 0 | -11.821700 | 1.793200  | 2.272000  |
| 38 | 1 | 0 | -3.698700  | 1.622000  | 6.421100  |
| 39 | 1 | 0 | -3.240500  | 2.639900  | 5.043200  |
| 40 | 1 | 0 | -4.874200  | 2.729900  | 5.703800  |
| 41 | 1 | 0 | -4.474200  | -0.587400 | 5.988100  |
| 42 | 1 | 0 | -5.032100  | -1.077100 | 4.289000  |

-----

SCF GIAO Magnetic shielding tensor (ppm):

|              |          |             |          |              |          |
|--------------|----------|-------------|----------|--------------|----------|
| 1            | C        | Isotropic = | 154.0790 | Anisotropy = | 27.4528  |
| XX=          | 163.3952 | YX=         | 12.8578  | ZX=          | 0.8533   |
| XY=          | 10.7070  | YY=         | 156.9297 | ZY=          | -0.6333  |
| XZ=          | -3.3524  | YZ=         | 3.4573   | ZZ=          | 141.9122 |
| Eigenvalues: | 141.3734 | 148.4828    | 172.3809 |              |          |
| 2            | C        | Isotropic = | 156.8428 | Anisotropy = | 21.6747  |

|              |             |          |              |     |          |          |  |
|--------------|-------------|----------|--------------|-----|----------|----------|--|
| XX=          | 169.7617    | YX=      | -4.4692      | ZX= | -0.9102  |          |  |
| XY=          | -3.8113     | YY=      | 159.4402     | ZY= | 4.6317   |          |  |
| XZ=          | 1.7369      | YZ=      | 6.4496       | ZZ= | 141.3265 |          |  |
| Eigenvalues: | 139.6875    | 159.5484 | 171.2926     |     |          |          |  |
| 3 C          | Isotropic = | 138.6882 | Anisotropy = |     |          | 20.3035  |  |
| XX=          | 135.0093    | YX=      | 0.8482       | ZX= | -0.0492  |          |  |
| XY=          | 7.8516      | YY=      | 150.2124     | ZY= | -6.1279  |          |  |
| XZ=          | 3.7277      | YZ=      | -3.5939      | ZZ= | 130.8428 |          |  |
| Eigenvalues: | 128.3893    | 135.4513 | 152.2238     |     |          |          |  |
| 4 C          | Isotropic = | 138.4386 | Anisotropy = |     |          | 28.5966  |  |
| XX=          | 157.2736    | YX=      | 0.7062       | ZX= | 0.1092   |          |  |
| XY=          | 1.1790      | YY=      | 139.8651     | ZY= | 9.1683   |          |  |
| XZ=          | -6.0733     | YZ=      | 9.7498       | ZZ= | 118.1772 |          |  |
| Eigenvalues: | 114.4039    | 143.4090 | 157.5030     |     |          |          |  |
| 5 C          | Isotropic = | 98.7292  | Anisotropy = |     |          | 60.3174  |  |
| XX=          | 129.7540    | YX=      | 15.2255      | ZX= | 2.5697   |          |  |
| XY=          | 21.3698     | YY=      | 102.4928     | ZY= | -0.6373  |          |  |
| XZ=          | 1.2181      | YZ=      | -5.8264      | ZZ= | 63.9407  |          |  |
| Eigenvalues: | 63.4716     | 93.7751  | 138.9408     |     |          |          |  |
| 6 C          | Isotropic = | 113.6232 | Anisotropy = |     |          | 45.9270  |  |
| XX=          | 103.4586    | YX=      | -5.1170      | ZX= | -19.5260 |          |  |
| XY=          | -2.1416     | YY=      | 101.9861     | ZY= | 3.5515   |          |  |
| XZ=          | -14.4617    | YZ=      | 10.4834      | ZZ= | 135.4249 |          |  |
| Eigenvalues: | 96.0476     | 100.5807 | 144.2412     |     |          |          |  |
| 7 C          | Isotropic = | 158.0045 | Anisotropy = |     |          | 44.6531  |  |
| XX=          | 141.1154    | YX=      | -4.7063      | ZX= | -10.2472 |          |  |
| XY=          | -5.4945     | YY=      | 183.9261     | ZY= | 13.8076  |          |  |
| XZ=          | -10.3514    | YZ=      | 5.8643       | ZZ= | 148.9720 |          |  |
| Eigenvalues: | 133.9779    | 152.2624 | 187.7732     |     |          |          |  |
| 8 C          | Isotropic = | 23.6043  | Anisotropy = |     |          | 200.3924 |  |
| XX=          | 154.8070    | YX=      | -15.3655     | ZX= | 21.1269  |          |  |
| XY=          | -14.9763    | YY=      | -51.7867     | ZY= | 57.7618  |          |  |
| XZ=          | 16.9147     | YZ=      | 52.2818      | ZZ= | -32.2075 |          |  |
| Eigenvalues: | -100.1151   | 13.7287  | 157.1992     |     |          |          |  |
| 9 C          | Isotropic = | 70.7856  | Anisotropy = |     |          | 104.5327 |  |
| XX=          | 26.2159     | YX=      | 6.4872       | ZX= | 28.5761  |          |  |
| XY=          | -17.7372    | YY=      | 53.3032      | ZY= | -7.5662  |          |  |
| XZ=          | 27.7809     | YZ=      | -5.1108      | ZZ= | 132.8377 |          |  |
| Eigenvalues: | 18.7727     | 53.1101  | 140.4741     |     |          |          |  |
| 10 C         | Isotropic = | 20.0350  | Anisotropy = |     |          | 103.9133 |  |
| XX=          | 1.7390      | YX=      | 33.8978      | ZX= | 24.2250  |          |  |
| XY=          | 45.1701     | YY=      | -20.0146     | ZY= | -26.9214 |          |  |
| XZ=          | 32.8012     | YZ=      | -23.3645     | ZZ= | 78.3807  |          |  |
| Eigenvalues: | -60.2125    | 31.0071  | 89.3105      |     |          |          |  |
| 11 C         | Isotropic = | 27.0503  | Anisotropy = |     |          | 131.8422 |  |
| XX=          | 11.1027     | YX=      | -30.6612     | ZX= | 13.8879  |          |  |
| XY=          | -22.2181    | YY=      | -39.8880     | ZY= | -17.0900 |          |  |
| XZ=          | 19.3579     | YZ=      | -11.7401     | ZZ= | 109.9363 |          |  |
| Eigenvalues: | -51.4169    | 17.6228  | 114.9451     |     |          |          |  |
| 12 C         | Isotropic = | 71.6213  | Anisotropy = |     |          | 114.7213 |  |
| XX=          | 49.1917     | YX=      | 31.8198      | ZX= | 22.5962  |          |  |
| XY=          | 38.2350     | YY=      | 27.6019      | ZY= | -23.4577 |          |  |

|              |          |             |          |              |          |          |
|--------------|----------|-------------|----------|--------------|----------|----------|
| XZ=          | 35.5996  | YZ=         | -22.3768 | ZZ=          | 138.0703 |          |
| Eigenvalues: | -7.1155  |             | 73.8772  |              | 148.1021 |          |
| 13           | C        | Isotropic = | 40.9933  | Anisotropy = |          | 193.8321 |
| XX=          | -47.3437 | YX=         | -12.5454 | ZX=          | 41.7926  |          |
| XY=          | -17.4028 | YY=         | 10.0440  | ZY=          | -17.9439 |          |
| XZ=          | 35.3226  | YZ=         | -21.1819 | ZZ=          | 160.2797 |          |
| Eigenvalues: | -56.2555 |             | 9.0208   |              | 170.2148 |          |
| 14           | C        | Isotropic = | 82.7465  | Anisotropy = |          | 118.9064 |
| XX=          | 74.4883  | YX=         | -18.1086 | ZX=          | 15.4016  |          |
| XY=          | -30.8208 | YY=         | 18.9770  | ZY=          | -15.2620 |          |
| XZ=          | 19.4944  | YZ=         | -20.2757 | ZZ=          | 154.7742 |          |
| Eigenvalues: | 8.9476   |             | 77.2745  |              | 162.0175 |          |
| 15           | O        | Isotropic = | 206.0643 | Anisotropy = |          | 57.3019  |
| XX=          | 165.8279 | YX=         | 14.6266  | ZX=          | 5.8961   |          |
| XY=          | 8.6664   | YY=         | 216.2362 | ZY=          | 4.6526   |          |
| XZ=          | 42.6696  | YZ=         | -19.9348 | ZZ=          | 236.1288 |          |
| Eigenvalues: | 155.3040 |             | 218.6234 |              | 244.2656 |          |
| 16           | O        | Isotropic = | 193.4394 | Anisotropy = |          | 109.8629 |
| XX=          | 178.4785 | YX=         | -66.7719 | ZX=          | -9.1045  |          |
| XY=          | -46.8013 | YY=         | 228.9565 | ZY=          | 14.1094  |          |
| XZ=          | 4.2324   | YZ=         | 3.6492   | ZZ=          | 172.8832 |          |
| Eigenvalues: | 141.3221 |             | 172.3148 |              | 266.6814 |          |
| 17           | O        | Isotropic = | 259.2172 | Anisotropy = |          | 45.4693  |
| XX=          | 281.5546 | YX=         | 13.6274  | ZX=          | -25.9226 |          |
| XY=          | 3.6313   | YY=         | 251.1307 | ZY=          | 27.7233  |          |
| XZ=          | -11.7212 | YZ=         | 8.9034   | ZZ=          | 244.9663 |          |
| Eigenvalues: | 222.6441 |             | 265.4774 |              | 289.5301 |          |
| 18           | C        | Isotropic = | 164.1706 | Anisotropy = |          | 40.9509  |
| XX=          | 189.8082 | YX=         | 2.5234   | ZX=          | -3.8524  |          |
| XY=          | 6.5458   | YY=         | 157.3424 | ZY=          | 1.5525   |          |
| XZ=          | -10.4270 | YZ=         | 0.7026   | ZZ=          | 145.3611 |          |
| Eigenvalues: | 143.9879 |             | 157.0526 |              | 191.4712 |          |
| 19           | C        | Isotropic = | 167.3127 | Anisotropy = |          | 24.5941  |
| XX=          | 160.5528 | YX=         | 3.9665   | ZX=          | -2.6628  |          |
| XY=          | 2.9899   | YY=         | 164.9931 | ZY=          | -13.4835 |          |
| XZ=          | -4.0707  | YZ=         | -7.7946  | ZZ=          | 176.3922 |          |
| Eigenvalues: | 157.7894 |             | 160.4400 |              | 183.7087 |          |
| 20           | C        | Isotropic = | 66.9907  | Anisotropy = |          | 112.5905 |
| XX=          | 140.9087 | YX=         | -7.9911  | ZX=          | 7.2026   |          |
| XY=          | -10.4157 | YY=         | 5.0193   | ZY=          | 58.5436  |          |
| XZ=          | 12.0676  | YZ=         | 58.6934  | ZZ=          | 55.0441  |          |
| Eigenvalues: | -34.6616 |             | 93.5826  |              | 142.0511 |          |
| 21           | H        | Isotropic = | 30.2160  | Anisotropy = |          | 8.5384   |
| XX=          | 32.6953  | YX=         | -2.4374  | ZX=          | -3.5458  |          |
| XY=          | -1.9606  | YY=         | 31.7635  | ZY=          | 1.2121   |          |
| XZ=          | -4.0762  | YZ=         | 0.9800   | ZZ=          | 26.1891  |          |
| Eigenvalues: | 24.4308  |             | 30.3090  |              | 35.9082  |          |
| 22           | H        | Isotropic = | 29.8417  | Anisotropy = |          | 7.7572   |
| XX=          | 30.4312  | YX=         | -0.2725  | ZX=          | 4.5965   |          |
| XY=          | 0.2339   | YY=         | 29.0522  | ZY=          | -1.9023  |          |
| XZ=          | 4.3106   | YZ=         | -1.9749  | ZZ=          | 30.0417  |          |
| Eigenvalues: | 25.2459  |             | 29.2659  |              | 35.0131  |          |

|              |         |             |         |              |         |
|--------------|---------|-------------|---------|--------------|---------|
| 23           | H       | Isotropic = | 30.1850 | Anisotropy = | 6.7787  |
| XX=          | 29.8385 | YX=         | -0.4198 | ZX=          | -4.4750 |
| XY=          | -0.5835 | YY=         | 30.4923 | ZY=          | -2.4294 |
| XZ=          | -3.6335 | YZ=         | -2.6884 | ZZ=          | 30.2241 |
| Eigenvalues: | 25.0921 |             | 30.7587 |              | 34.7041 |
| 24           | H       | Isotropic = | 30.3571 | Anisotropy = | 9.0000  |
| XX=          | 33.5877 | YX=         | 2.2937  | ZX=          | 3.4102  |
| XY=          | 2.6986  | YY=         | 31.5017 | ZY=          | 1.1566  |
| XZ=          | 3.4806  | YZ=         | 0.5988  | ZZ=          | 25.9819 |
| Eigenvalues: | 24.6522 |             | 30.0620 |              | 36.3571 |
| 25           | H       | Isotropic = | 27.9996 | Anisotropy = | 5.1465  |
| XX=          | 24.6851 | YX=         | 0.1542  | ZX=          | -1.3096 |
| XY=          | -0.4134 | YY=         | 31.3100 | ZY=          | -0.5403 |
| XZ=          | 0.2924  | YZ=         | 1.7859  | ZZ=          | 28.0036 |
| Eigenvalues: | 24.6087 |             | 27.9594 |              | 31.4306 |
| 26           | H       | Isotropic = | 27.8675 | Anisotropy = | 6.4460  |
| XX=          | 25.4027 | YX=         | 1.5470  | ZX=          | 0.5560  |
| XY=          | 1.0177  | YY=         | 29.8237 | ZY=          | -1.9151 |
| XZ=          | -2.4186 | YZ=         | -3.2739 | ZZ=          | 28.3762 |
| Eigenvalues: | 25.0306 |             | 26.4072 |              | 32.1649 |
| 27           | H       | Isotropic = | 27.2232 | Anisotropy = | 4.0658  |
| XX=          | 25.9630 | YX=         | 0.3590  | ZX=          | -2.0248 |
| XY=          | 0.5130  | YY=         | 26.9113 | ZY=          | 1.3088  |
| XZ=          | -1.2093 | YZ=         | 1.4361  | ZZ=          | 28.7952 |
| Eigenvalues: | 24.7470 |             | 26.9889 |              | 29.9337 |
| 28           | H       | Isotropic = | 30.9757 | Anisotropy = | 10.2540 |
| XX=          | 29.0320 | YX=         | -2.2461 | ZX=          | -3.0318 |
| XY=          | -2.8063 | YY=         | 32.1664 | ZY=          | 4.7629  |
| XZ=          | -2.9464 | YZ=         | 3.4995  | ZZ=          | 31.7288 |
| Eigenvalues: | 27.0917 |             | 28.0237 |              | 37.8117 |
| 29           | H       | Isotropic = | 30.5456 | Anisotropy = | 8.6827  |
| XX=          | 29.3342 | YX=         | -2.3951 | ZX=          | 2.0885  |
| XY=          | -3.1817 | YY=         | 33.5123 | ZY=          | -3.0053 |
| XZ=          | 2.4230  | YZ=         | -2.0278 | ZZ=          | 28.7904 |
| Eigenvalues: | 26.7899 |             | 28.5129 |              | 36.3341 |
| 30           | H       | Isotropic = | 30.1997 | Anisotropy = | 7.7787  |
| XX=          | 31.0557 | YX=         | 1.1384  | ZX=          | 0.7436  |
| XY=          | 2.8024  | YY=         | 34.4753 | ZY=          | 0.1841  |
| XZ=          | 0.7364  | YZ=         | -0.1151 | ZZ=          | 25.0681 |
| Eigenvalues: | 24.9733 |             | 30.2402 |              | 35.3855 |
| 31           | H       | Isotropic = | 25.3284 | Anisotropy = | 7.0635  |
| XX=          | 28.4814 | YX=         | 2.3898  | ZX=          | -0.7681 |
| XY=          | 2.4469  | YY=         | 25.9780 | ZY=          | 0.0608  |
| XZ=          | -1.0054 | YZ=         | -0.4086 | ZZ=          | 21.5259 |
| Eigenvalues: | 21.4102 |             | 24.5376 |              | 30.0374 |
| 32           | H       | Isotropic = | 25.4158 | Anisotropy = | 7.3190  |
| XX=          | 30.0108 | YX=         | -0.7606 | ZX=          | -1.2223 |
| XY=          | -0.4581 | YY=         | 24.6005 | ZY=          | 0.6877  |
| XZ=          | -1.3251 | YZ=         | 1.0562  | ZZ=          | 21.6361 |
| Eigenvalues: | 21.2644 |             | 24.6879 |              | 30.2952 |
| 33           | H       | Isotropic = | 25.6723 | Anisotropy = | 23.8263 |
| XX=          | 40.1447 | YX=         | 1.4051  | ZX=          | 4.0388  |

|              |             |         |              |     |         |         |
|--------------|-------------|---------|--------------|-----|---------|---------|
| XY=          | 2.6778      | YY=     | 21.8583      | ZY= | 2.2557  |         |
| XZ=          | 6.4526      | YZ=     | 4.3103       | ZZ= | 15.0140 |         |
| Eigenvalues: | 13.0367     |         | 22.4238      |     | 41.5566 |         |
| 34 H         | Isotropic = | 30.5153 | Anisotropy = |     |         | 15.0221 |
| XX=          | 38.5892     | YX=     | 5.3537       | ZX= | -0.7781 |         |
| XY=          | 5.0802      | YY=     | 24.7849      | ZY= | -2.6696 |         |
| XZ=          | -0.6340     | YZ=     | -2.6652      | ZZ= | 28.1718 |         |
| Eigenvalues: | 22.1364     |         | 28.8795      |     | 40.5301 |         |
| 35 H         | Isotropic = | 29.8117 | Anisotropy = |     |         | 8.0012  |
| XX=          | 33.4891     | YX=     | -3.7325      | ZX= | -0.3059 |         |
| XY=          | -1.3585     | YY=     | 31.2335      | ZY= | -0.3855 |         |
| XZ=          | 0.1766      | YZ=     | -0.0738      | ZZ= | 24.7127 |         |
| Eigenvalues: | 24.7016     |         | 29.5878      |     | 35.1459 |         |
| 36 H         | Isotropic = | 29.5899 | Anisotropy = |     |         | 8.1707  |
| XX=          | 32.2024     | YX=     | 3.4046       | ZX= | 1.7471  |         |
| XY=          | 1.4004      | YY=     | 29.6936      | ZY= | 3.2978  |         |
| XZ=          | 1.7535      | YZ=     | 3.4146       | ZZ= | 26.8736 |         |
| Eigenvalues: | 24.6406     |         | 29.0920      |     | 35.0370 |         |
| 37 H         | Isotropic = | 29.3677 | Anisotropy = |     |         | 8.6934  |
| XX=          | 29.7957     | YX=     | 1.3303       | ZX= | -3.2045 |         |
| XY=          | 1.1298      | YY=     | 27.3263      | ZY= | -2.2166 |         |
| XZ=          | -4.3877     | YZ=     | -2.7708      | ZZ= | 30.9811 |         |
| Eigenvalues: | 25.8165     |         | 27.1233      |     | 35.1633 |         |
| 38 H         | Isotropic = | 29.8899 | Anisotropy = |     |         | 8.7679  |
| XX=          | 26.8507     | YX=     | 2.7206       | ZX= | -0.6715 |         |
| XY=          | 2.2359      | YY=     | 34.8213      | ZY= | -0.1810 |         |
| XZ=          | -0.8015     | YZ=     | -2.0224      | ZZ= | 27.9976 |         |
| Eigenvalues: | 26.0505     |         | 27.8840      |     | 35.7352 |         |
| 39 H         | Isotropic = | 29.9424 | Anisotropy = |     |         | 6.6647  |
| XX=          | 29.4652     | YX=     | -1.1384      | ZX= | -4.6742 |         |
| XY=          | -0.6049     | YY=     | 30.3939      | ZY= | -2.0605 |         |
| XZ=          | -4.5828     | YZ=     | -0.5671      | ZZ= | 29.9680 |         |
| Eigenvalues: | 24.6681     |         | 30.7735      |     | 34.3855 |         |
| 40 H         | Isotropic = | 29.4652 | Anisotropy = |     |         | 5.4008  |
| XX=          | 30.7600     | YX=     | 0.5158       | ZX= | 3.2155  |         |
| XY=          | 0.4042      | YY=     | 28.5560      | ZY= | -2.6037 |         |
| XZ=          | 2.1944      | YZ=     | -2.2657      | ZZ= | 29.0795 |         |
| Eigenvalues: | 25.4156     |         | 29.9142      |     | 33.0657 |         |
| 41 H         | Isotropic = | 26.4705 | Anisotropy = |     |         | 6.5098  |
| XX=          | 25.4168     | YX=     | 0.7190       | ZX= | 0.3148  |         |
| XY=          | 0.6274      | YY=     | 26.8573      | ZY= | 2.0187  |         |
| XZ=          | 0.6352      | YZ=     | 5.3591       | ZZ= | 27.1376 |         |
| Eigenvalues: | 23.2940     |         | 25.3072      |     | 30.8104 |         |
| 42 H         | Isotropic = | 26.2690 | Anisotropy = |     |         | 7.2958  |
| XX=          | 25.3149     | YX=     | 0.2203       | ZX= | 0.3926  |         |
| XY=          | -0.2831     | YY=     | 25.9681      | ZY= | 5.7083  |         |
| XZ=          | 1.0409      | YZ=     | 2.8276       | ZZ= | 27.5240 |         |
| Eigenvalues: | 22.3287     |         | 25.3454      |     | 31.1329 |         |

Number of frequencies: 120

harmonic frequencies in  $\text{cm}^{-1}$ , reduced masses in amu,

force constants in mDyne/A, and

normal modes in cartesian coordinates: 120

IR intensities in  $\text{km/mol}$

vibration # 1 2 3 4 5 6

-----

frequencies 53.56 64.57 84.42 98.42 118.11 136.08

intensities 0.70 1.09 0.32 1.03 1.06 5.40

reduc. mass 1.30 1.48 0.84 1.55 0.27 1.68

force const 0.00 0.00 0.00 0.01 0.00 0.02

vibration # 7 8 9 10 11 12

-----

frequencies 155.89 193.48 211.26 230.85 235.29 257.81

intensities 1.05 5.04 1.20 4.21 2.50 0.58

reduc. mass 0.74 0.66 0.61 0.39 1.31 2.29

force const 0.01 0.01 0.02 0.01 0.04 0.09

vibration # 13 14 15 16 17 18

-----

frequencies 269.40 284.98 292.63 306.06 316.19 338.73

intensities 0.52 0.46 1.85 0.76 0.09 2.23

reduc. mass 0.69 0.48 0.43 0.38 2.98 0.84

force const 0.03 0.02 0.02 0.02 0.18 0.06

vibration # 19 20 21 22 23 24

-----



|             |        |        |        |        |        |        |
|-------------|--------|--------|--------|--------|--------|--------|
| frequencies | 360.13 | 392.41 | 396.11 | 446.07 | 470.25 | 499.72 |
| intensities | 4.19   | 1.80   | 4.52   | 1.85   | 0.04   | 15.72  |
| reduc. mass | 0.67   | 0.69   | 1.69   | 1.19   | 0.63   | 0.56   |
| force const | 0.05   | 0.06   | 0.16   | 0.14   | 0.08   | 0.08   |

vibration #      25    26    27    28    29    30

-----

|             |        |        |        |        |        |        |
|-------------|--------|--------|--------|--------|--------|--------|
| frequencies | 521.63 | 529.47 | 536.48 | 553.56 | 574.61 | 592.07 |
| intensities | 7.57   | 22.07  | 16.17  | 2.90   | 124.46 | 6.61   |
| reduc. mass | 0.53   | 1.42   | 0.40   | 0.86   | 0.50   | 0.37   |
| force const | 0.09   | 0.23   | 0.07   | 0.16   | 0.10   | 0.08   |

vibration #      31    32    33    34    35    36

-----

|             |        |        |        |        |        |        |
|-------------|--------|--------|--------|--------|--------|--------|
| frequencies | 610.70 | 669.11 | 685.63 | 710.07 | 725.31 | 732.80 |
| intensities | 119.60 | 0.91   | 4.61   | 3.01   | 1.17   | 0.60   |
| reduc. mass | 0.55   | 0.85   | 1.25   | 0.33   | 0.87   | 0.70   |
| force const | 0.12   | 0.22   | 0.35   | 0.10   | 0.27   | 0.22   |

vibration #      37    38    39    40    41    42

-----

|             |        |        |        |        |        |        |
|-------------|--------|--------|--------|--------|--------|--------|
| frequencies | 745.32 | 772.77 | 794.58 | 827.61 | 852.11 | 902.78 |
| intensities | 2.42   | 1.63   | 6.17   | 15.76  | 11.02  | 1.79   |
| reduc. mass | 0.99   | 0.36   | 2.42   | 1.17   | 0.63   | 0.59   |
| force const | 0.32   | 0.13   | 0.90   | 0.47   | 0.27   | 0.28   |

vibration #      43    44    45    46    47    48

-----

|             |        |        |        |        |         |         |
|-------------|--------|--------|--------|--------|---------|---------|
| frequencies | 932.17 | 937.85 | 949.88 | 993.78 | 1003.80 | 1021.20 |
|-------------|--------|--------|--------|--------|---------|---------|

|             |      |      |       |      |      |       |
|-------------|------|------|-------|------|------|-------|
| intensities | 5.36 | 1.18 | 15.18 | 3.81 | 8.46 | 11.88 |
| reduc. mass | 0.46 | 0.58 | 0.63  | 0.30 | 0.26 | 0.21  |
| force const | 0.24 | 0.30 | 0.33  | 0.17 | 0.15 | 0.13  |

vibration #      49    50    51    52    53    54

-----

|             |         |         |         |         |         |         |
|-------------|---------|---------|---------|---------|---------|---------|
| frequencies | 1028.88 | 1032.98 | 1038.20 | 1063.42 | 1065.98 | 1093.60 |
| intensities | 14.76   | 7.74    | 5.90    | 18.03   | 43.53   | 6.55    |
| reduc. mass | 0.27    | 0.27    | 0.32    | 0.33    | 0.30    | 0.68    |
| force const | 0.17    | 0.17    | 0.20    | 0.22    | 0.20    | 0.48    |

vibration #      55    56    57    58    59    60

-----

|             |         |         |         |         |         |         |
|-------------|---------|---------|---------|---------|---------|---------|
| frequencies | 1097.55 | 1126.47 | 1130.14 | 1143.24 | 1158.15 | 1207.08 |
| intensities | 80.78   | 90.47   | 13.17   | 45.74   | 18.23   | 136.51  |
| reduc. mass | 0.71    | 0.75    | 0.62    | 0.62    | 0.25    | 1.66    |
| force const | 0.51    | 0.56    | 0.46    | 0.48    | 0.20    | 1.42    |

vibration #      61    62    63    64    65    66

-----

|             |         |         |         |         |         |         |
|-------------|---------|---------|---------|---------|---------|---------|
| frequencies | 1227.04 | 1245.76 | 1256.65 | 1264.64 | 1299.16 | 1344.45 |
| intensities | 48.08   | 43.48   | 114.86  | 10.31   | 64.92   | 21.93   |
| reduc. mass | 0.75    | 0.33    | 0.98    | 0.29    | 1.04    | 0.43    |
| force const | 0.66    | 0.30    | 0.92    | 0.27    | 1.03    | 0.46    |

vibration #      67    68    69    70    71    72

-----

|             |         |         |         |         |         |         |
|-------------|---------|---------|---------|---------|---------|---------|
| frequencies | 1377.12 | 1383.81 | 1389.86 | 1411.21 | 1443.66 | 1451.61 |
| intensities | 33.99   | 397.98  | 41.56   | 40.97   | 65.35   | 48.79   |

|             |      |      |      |      |      |      |
|-------------|------|------|------|------|------|------|
| reduc. mass | 0.40 | 0.80 | 0.74 | 1.01 | 3.06 | 0.81 |
| force const | 0.45 | 0.90 | 0.84 | 1.18 | 3.76 | 1.01 |

vibration #      73    74    75    76    77    78

-----

|             |         |         |         |         |         |         |
|-------------|---------|---------|---------|---------|---------|---------|
| frequencies | 1491.03 | 1494.42 | 1503.62 | 1522.45 | 1528.92 | 1553.00 |
| intensities | 73.37   | 15.20   | 1.00    | 242.30  | 10.82   | 5.73    |
| reduc. mass | 0.52    | 0.66    | 0.58    | 0.93    | 0.77    | 0.53    |
| force const | 0.67    | 0.87    | 0.77    | 1.27    | 1.06    | 0.76    |

vibration #      79    80    81    82    83    84

-----

|             |         |         |         |         |         |         |
|-------------|---------|---------|---------|---------|---------|---------|
| frequencies | 1562.86 | 1577.44 | 1589.74 | 1616.44 | 1631.12 | 1638.93 |
| intensities | 58.20   | 24.77   | 63.41   | 143.45  | 17.32   | 18.21   |
| reduc. mass | 0.53    | 0.70    | 0.44    | 0.60    | 0.45    | 0.16    |
| force const | 0.76    | 1.02    | 0.66    | 0.92    | 0.70    | 0.25    |

vibration #      85    86    87    88    89    90

-----

|             |         |         |         |         |         |         |
|-------------|---------|---------|---------|---------|---------|---------|
| frequencies | 1643.36 | 1646.92 | 1653.68 | 1659.53 | 1661.89 | 1663.06 |
| intensities | 33.86   | 3.07    | 31.05   | 18.30   | 26.49   | 17.29   |
| reduc. mass | 0.14    | 0.26    | 0.20    | 0.37    | 0.12    | 0.28    |
| force const | 0.23    | 0.41    | 0.33    | 0.60    | 0.20    | 0.45    |

vibration #      91    92    93    94    95    96

-----

|             |         |         |         |         |         |         |
|-------------|---------|---------|---------|---------|---------|---------|
| frequencies | 1664.69 | 1667.70 | 1670.57 | 1676.64 | 1706.42 | 1790.81 |
| intensities | 16.59   | 47.86   | 16.94   | 99.83   | 173.08  | 808.37  |
| reduc. mass | 0.28    | 0.15    | 0.14    | 0.27    | 0.64    | 1.44    |

force const 0.45 0.25 0.24 0.44 1.10 2.72

vibration # 97 98 99 100 101 102

-----

frequencies 1849.12 1890.38 3011.79 3026.43 3030.60 3055.53

intensities 400.64 18.58 702.54 390.78 626.70 371.69

reduc. mass 1.57 0.86 0.24 0.27 0.25 0.45

force const 3.17 1.81 1.29 1.47 1.33 2.47

vibration # 103 104 105 106 107 108

-----

frequencies 3056.63 3079.66 3090.41 3094.83 3102.86 3120.54

intensities 388.07 295.97 672.94 389.92 55.83 516.38

reduc. mass 0.28 0.51 0.42 0.86 0.46 0.13

force const 1.52 2.85 2.37 4.87 2.63 0.72

vibration # 109 110 111 112 113 114

-----

frequencies 3126.44 3132.77 3138.04 3141.65 3146.01 3146.92

intensities 317.26 210.53 447.04 443.01 208.44 509.93

reduc. mass 0.30 0.16 0.23 0.51 0.23 0.19

force const 1.72 0.95 1.34 2.98 1.36 1.10

vibration # 115 116 117 118 119 120

-----

frequencies 3147.52 3160.68 3180.92 3197.16 3829.28 3835.72

intensities 205.94 179.13 389.86 373.33 63.84 438.19

reduc. mass 0.23 0.47 0.62 0.55 0.92 0.92

force const 1.34 2.78 3.71 3.34 7.92 7.94

Number of imaginary frequencies: 0

## Conformation 2

Boltzmann Population = 9.1% (relative energy = 1.01 kcal/mol)

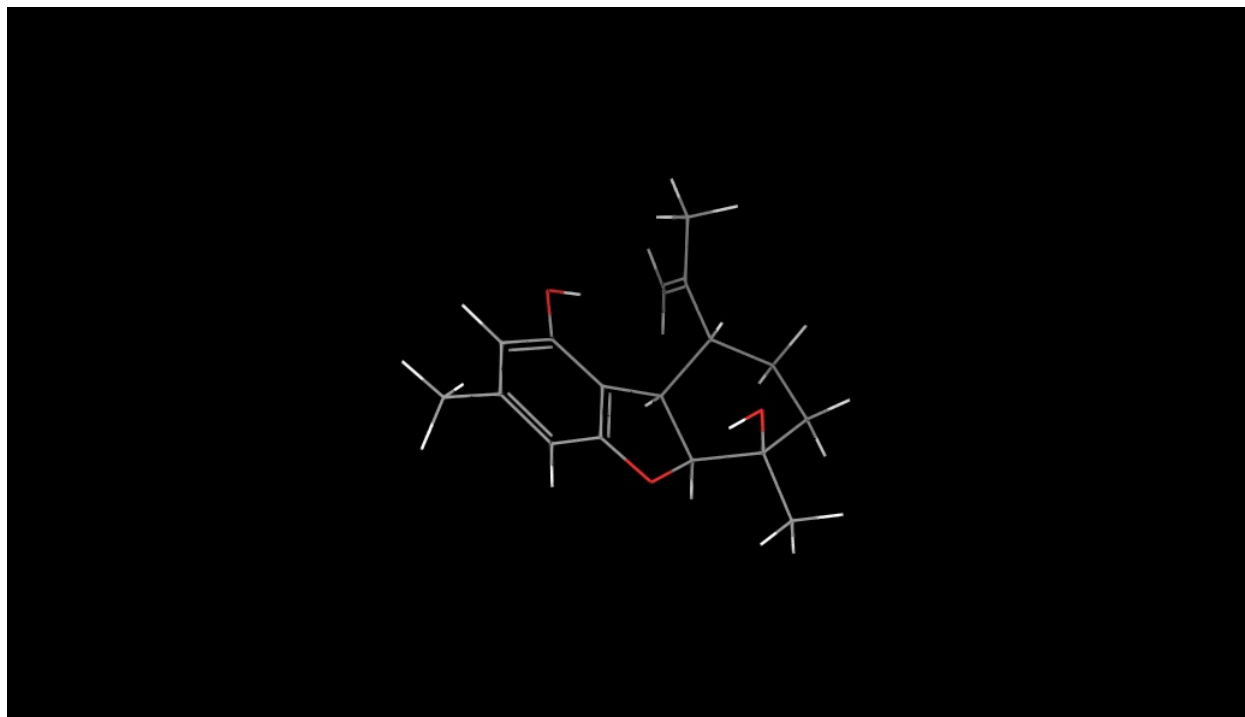

Geometries and Energy Method: M06-2X-D3/6-31G(d,p)

NMR Method: mPW1PW91/6-311+G(2d,p)

Thermodynamic properties for P = 1.00 atm, calculated at 1 temperatures

T = 298.15 K, P = 1.00 atm

Total internal energy,  $U_{\text{tot}}(\text{SCFE} + \text{ZPE} + U)$ : -885.982115 hartrees

Total enthalpy,  $H_{\text{tot}}(U_{\text{tot}} + pV)$ : -885.981170 hartrees

Total Gibbs free energy,  $G_{\text{tot}}(H_{\text{tot}} - T^*S)$ : -886.043739 hartrees

Optimized Geometry:

| Center Number | Atomic Number | Atomic Type | Coordinates (Angstroms) |          |          |
|---------------|---------------|-------------|-------------------------|----------|----------|
|               |               |             | X                       | Y        | Z        |
| 1             | 6             | 0           | -3.540900               | 1.828700 | 0.862200 |
| 2             | 6             | 0           | -3.423200               | 1.594900 | 2.380100 |
| 3             | 6             | 0           | -4.783600               | 1.359900 | 3.058900 |
| 4             | 6             | 0           | -5.644300               | 2.630000 | 2.874100 |
| 5             | 6             | 0           | -5.637400               | 3.147900 | 1.397600 |

|    |   |   |            |           |           |
|----|---|---|------------|-----------|-----------|
| 6  | 6 | 0 | -4.945900  | 2.216100  | 0.389400  |
| 7  | 6 | 0 | -4.896000  | 2.870500  | -0.990900 |
| 8  | 6 | 0 | -4.578500  | 0.977300  | 4.515400  |
| 9  | 6 | 0 | -7.127700  | 2.479800  | 3.134800  |
| 10 | 6 | 0 | -7.826800  | 2.851700  | 1.989600  |
| 11 | 6 | 0 | -7.865400  | 2.090300  | 4.250200  |
| 12 | 6 | 0 | -9.264100  | 2.043500  | 4.165400  |
| 13 | 6 | 0 | -9.931000  | 2.394900  | 2.997600  |
| 14 | 6 | 0 | -9.202900  | 2.819400  | 1.877800  |
| 15 | 8 | 0 | -7.317000  | 1.747300  | 5.440900  |
| 16 | 8 | 0 | -7.010700  | 3.263400  | 0.973700  |
| 17 | 8 | 0 | -5.692100  | 1.007800  | 0.310700  |
| 18 | 6 | 0 | -11.434900 | 2.317400  | 2.919900  |
| 19 | 6 | 0 | -4.966900  | -0.430400 | 4.874000  |
| 20 | 6 | 0 | -4.067800  | 1.825200  | 5.415900  |
| 21 | 1 | 0 | -2.832400  | 2.602300  | 0.549400  |
| 22 | 1 | 0 | -3.284400  | 0.920400  | 0.308800  |
| 23 | 1 | 0 | -2.961800  | 2.466000  | 2.862500  |
| 24 | 1 | 0 | -2.758800  | 0.749800  | 2.584200  |
| 25 | 1 | 0 | -5.291700  | 0.536300  | 2.550100  |
| 26 | 1 | 0 | -5.215300  | 3.411100  | 3.516000  |
| 27 | 1 | 0 | -5.192100  | 4.147400  | 1.336600  |
| 28 | 1 | 0 | -5.907700  | 3.102100  | -1.335400 |
| 29 | 1 | 0 | -4.318900  | 3.799600  | -0.971500 |
| 30 | 1 | 0 | -4.431600  | 2.181800  | -1.701600 |
| 31 | 1 | 0 | -9.812400  | 1.731100  | 5.047700  |
| 32 | 1 | 0 | -9.691600  | 3.122600  | 0.958900  |
| 33 | 1 | 0 | -6.357800  | 1.889300  | 5.423700  |
| 34 | 1 | 0 | -6.606200  | 1.263800  | 0.123700  |
| 35 | 1 | 0 | -11.876600 | 2.163600  | 3.906300  |
| 36 | 1 | 0 | -11.853100 | 3.234500  | 2.495500  |
| 37 | 1 | 0 | -11.747300 | 1.488100  | 2.277300  |
| 38 | 1 | 0 | -4.750200  | -0.662400 | 5.918900  |
| 39 | 1 | 0 | -6.038100  | -0.576500 | 4.696500  |
| 40 | 1 | 0 | -4.432800  | -1.142900 | 4.235700  |
| 41 | 1 | 0 | -3.902100  | 1.521000  | 6.445000  |
| 42 | 1 | 0 | -3.779400  | 2.839900  | 5.154600  |

-----

SCF GIAO Magnetic shielding tensor (ppm):

|              |          |             |          |              |          |
|--------------|----------|-------------|----------|--------------|----------|
| 1            | C        | Isotropic = | 154.4490 | Anisotropy = | 27.8000  |
| XX=          | 160.2047 | YX=         | 11.8359  | ZX=          | -0.5956  |
| XY=          | 10.3046  | YY=         | 163.0871 | ZY=          | -2.9653  |
| XZ=          | -4.1687  | YZ=         | 0.8048   | ZZ=          | 140.0553 |
| Eigenvalues: | 139.7750 | 150.5897    | 172.9824 |              |          |
| 2            | C        | Isotropic = | 155.0107 | Anisotropy = | 24.7051  |
| XX=          | 163.3269 | YX=         | -9.5085  | ZX=          | -6.2974  |
| XY=          | -8.0240  | YY=         | 161.8931 | ZY=          | -8.0747  |
| XZ=          | -4.6718  | YZ=         | -7.9924  | ZZ=          | 139.8123 |
| Eigenvalues: | 134.8687 | 158.6827    | 171.4808 |              |          |
| 3            | C        | Isotropic = | 143.1577 | Anisotropy = | 15.2162  |

|              |             |          |              |          |          |  |
|--------------|-------------|----------|--------------|----------|----------|--|
| XX=          | 143.0217    | YX=      | -1.2975      | ZX=      | 3.1882   |  |
| XY=          | 5.8050      | YY=      | 152.8052     | ZY=      | -1.7601  |  |
| XZ=          | 3.2847      | YZ=      | -0.0837      | ZZ=      | 133.6461 |  |
| Eigenvalues: | 132.5170    | 143.6542 | 153.3018     |          |          |  |
| 4 C          | Isotropic = | 133.7347 | Anisotropy = | 23.7195  |          |  |
| XX=          | 143.3683    | YX=      | 7.9786       | ZX=      | 3.2446   |  |
| XY=          | 3.6982      | YY=      | 141.4159     | ZY=      | 5.2901   |  |
| XZ=          | 2.2954      | YZ=      | 7.7406       | ZZ=      | 116.4200 |  |
| Eigenvalues: | 114.7614    | 136.8951 | 149.5477     |          |          |  |
| 5 C          | Isotropic = | 98.1095  | Anisotropy = | 59.5781  |          |  |
| XX=          | 125.4409    | YX=      | 16.3623      | ZX=      | -2.0251  |  |
| XY=          | 22.5673     | YY=      | 105.1827     | ZY=      | -6.3306  |  |
| XZ=          | -4.4454     | YZ=      | -8.0698      | ZZ=      | 63.7048  |  |
| Eigenvalues: | 62.4904     | 94.0099  | 137.8282     |          |          |  |
| 6 C          | Isotropic = | 114.2915 | Anisotropy = | 47.2893  |          |  |
| XX=          | 102.6099    | YX=      | -4.6687      | ZX=      | -19.0953 |  |
| XY=          | -1.3402     | YY=      | 102.2769     | ZY=      | 1.5098   |  |
| XZ=          | -15.2842    | YZ=      | 9.2072       | ZZ=      | 137.9877 |  |
| Eigenvalues: | 95.5347     | 101.5221 | 145.8177     |          |          |  |
| 7 C          | Isotropic = | 157.6235 | Anisotropy = | 45.8687  |          |  |
| XX=          | 139.6956    | YX=      | -10.5963     | ZX=      | -10.6192 |  |
| XY=          | -11.2049    | YY=      | 182.4203     | ZY=      | 12.3477  |  |
| XZ=          | -8.8675     | YZ=      | 5.0250       | ZZ=      | 150.7547 |  |
| Eigenvalues: | 133.4105    | 151.2575 | 188.2027     |          |          |  |
| 8 C          | Isotropic = | 16.0275  | Anisotropy = | 213.2761 |          |  |
| XX=          | 146.1139    | YX=      | 29.5610      | ZX=      | 45.5258  |  |
| XY=          | 27.3201     | YY=      | -64.5882     | ZY=      | -52.7544 |  |
| XZ=          | 45.2269     | YZ=      | -44.9127     | ZZ=      | -33.4431 |  |
| Eigenvalues: | -110.0620   | -0.0670  | 158.2116     |          |          |  |
| 9 C          | Isotropic = | 72.8771  | Anisotropy = | 98.8261  |          |  |
| XX=          | 29.9773     | YX=      | 7.7864       | ZX=      | 26.0988  |  |
| XY=          | -16.2151    | YY=      | 56.3515      | ZY=      | 5.1772   |  |
| XZ=          | 26.0041     | YZ=      | 5.3441       | ZZ=      | 132.3027 |  |
| Eigenvalues: | 22.8756     | 56.9946  | 138.7612     |          |          |  |
| 10 C         | Isotropic = | 20.4887  | Anisotropy = | 103.8632 |          |  |
| XX=          | -4.8876     | YX=      | 37.7034      | ZX=      | 24.6767  |  |
| XY=          | 50.7268     | YY=      | -16.7547     | ZY=      | -12.6131 |  |
| XZ=          | 25.3873     | YZ=      | -10.8805     | ZZ=      | 83.1085  |  |
| Eigenvalues: | -59.9563    | 31.6916  | 89.7309      |          |          |  |
| 11 C         | Isotropic = | 27.0468  | Anisotropy = | 135.2719 |          |  |
| XX=          | 15.4562     | YX=      | -22.0826     | ZX=      | 25.3061  |  |
| XY=          | -11.7114    | YY=      | -43.5828     | ZY=      | 9.5603   |  |
| XZ=          | 31.1709     | YZ=      | 8.7327       | ZZ=      | 109.2670 |  |
| Eigenvalues: | -49.8023    | 13.7147  | 117.2281     |          |          |  |
| 12 C         | Isotropic = | 73.7269  | Anisotropy = | 111.9335 |          |  |
| XX=          | 44.5996     | YX=      | 36.5475      | ZX=      | 24.1900  |  |
| XY=          | 43.1442     | YY=      | 34.4336      | ZY=      | -7.2065  |  |
| XZ=          | 25.7848     | YZ=      | -3.4761      | ZZ=      | 142.1475 |  |
| Eigenvalues: | -3.5980     | 76.4295  | 148.3492     |          |          |  |
| 13 C         | Isotropic = | 40.9227  | Anisotropy = | 193.7961 |          |  |
| XX=          | -41.4369    | YX=      | -10.7128     | ZX=      | 51.4203  |  |
| XY=          | -17.4672    | YY=      | 5.4996       | ZY=      | 6.6959   |  |



|              |          |             |          |              |          |          |
|--------------|----------|-------------|----------|--------------|----------|----------|
| XZ=          | 46.5775  | YZ=         | 6.4112   | ZZ=          | 158.7052 |          |
| Eigenvalues: | -56.5197 |             | 9.1676   |              | 170.1200 |          |
| 14           | C        | Isotropic = | 83.8167  | Anisotropy = |          | 118.9230 |
| XX=          | 80.1620  | YX=         | -9.4564  | ZX=          | 20.8652  |          |
| XY=          | -22.1534 | YY=         | 14.3996  | ZY=          | 5.9205   |          |
| XZ=          | 24.5160  | YZ=         | 1.5709   | ZZ=          | 156.8884 |          |
| Eigenvalues: | 10.2603  |             | 78.0910  |              | 163.0986 |          |
| 15           | O        | Isotropic = | 191.6540 | Anisotropy = |          | 75.3659  |
| XX=          | 155.9419 | YX=         | 17.5521  | ZX=          | 24.1227  |          |
| XY=          | 11.4829  | YY=         | 191.2402 | ZY=          | -11.1961 |          |
| XZ=          | 29.2958  | YZ=         | -31.3219 | ZZ=          | 227.7798 |          |
| Eigenvalues: | 138.7283 |             | 194.3358 |              | 241.8979 |          |
| 16           | O        | Isotropic = | 190.6984 | Anisotropy = |          | 108.9576 |
| XX=          | 188.6211 | YX=         | -71.4905 | ZX=          | 0.3752   |          |
| XY=          | -47.1951 | YY=         | 216.1973 | ZY=          | 10.1196  |          |
| XZ=          | 9.4039   | YZ=         | -3.9529  | ZZ=          | 167.2769 |          |
| Eigenvalues: | 140.2631 |             | 168.4953 |              | 263.3368 |          |
| 17           | O        | Isotropic = | 259.6782 | Anisotropy = |          | 39.8128  |
| XX=          | 275.4369 | YX=         | 13.1940  | ZX=          | -25.2377 |          |
| XY=          | 4.7430   | YY=         | 254.6246 | ZY=          | 25.9279  |          |
| XZ=          | -14.7561 | YZ=         | 3.3624   | ZZ=          | 248.9731 |          |
| Eigenvalues: | 227.4158 |             | 265.3987 |              | 286.2200 |          |
| 18           | C        | Isotropic = | 164.0796 | Anisotropy = |          | 41.2270  |
| XX=          | 188.3055 | YX=         | 3.3993   | ZX=          | -7.5796  |          |
| XY=          | 7.9143   | YY=         | 157.8369 | ZY=          | -1.2256  |          |
| XZ=          | -12.5552 | YZ=         | -0.8908  | ZZ=          | 146.0965 |          |
| Eigenvalues: | 143.8148 |             | 156.8598 |              | 191.5643 |          |
| 19           | C        | Isotropic = | 158.7158 | Anisotropy = |          | 41.4672  |
| XX=          | 140.8536 | YX=         | -4.6584  | ZX=          | -7.1747  |          |
| XY=          | -3.2093  | YY=         | 166.3408 | ZY=          | 15.3256  |          |
| XZ=          | -7.4310  | YZ=         | 19.1616  | ZZ=          | 168.9531 |          |
| Eigenvalues: | 139.0647 |             | 150.7222 |              | 186.3606 |          |
| 20           | C        | Isotropic = | 72.6775  | Anisotropy = |          | 133.9116 |
| XX=          | 155.4085 | YX=         | 27.3810  | ZX=          | 21.4245  |          |
| XY=          | 26.3611  | YY=         | -7.0488  | ZY=          | -47.4011 |          |
| XZ=          | 20.7367  | YZ=         | -50.1306 | ZZ=          | 69.6729  |          |
| Eigenvalues: | -36.5506 |             | 92.6312  |              | 161.9519 |          |
| 21           | H        | Isotropic = | 30.2315  | Anisotropy = |          | 8.4234   |
| XX=          | 32.4112  | YX=         | -1.9569  | ZX=          | -4.3785  |          |
| XY=          | -1.5308  | YY=         | 31.1945  | ZY=          | 1.0926   |          |
| XZ=          | -4.8130  | YZ=         | 0.5154   | ZZ=          | 27.0887  |          |
| Eigenvalues: | 24.4345  |             | 30.4128  |              | 35.8471  |          |
| 22           | H        | Isotropic = | 29.8620  | Anisotropy = |          | 7.8656   |
| XX=          | 30.9974  | YX=         | -0.5421  | ZX=          | 4.7553   |          |
| XY=          | -0.1299  | YY=         | 29.5930  | ZY=          | -1.6389  |          |
| XZ=          | 4.6689   | YZ=         | -1.5251  | ZZ=          | 28.9957  |          |
| Eigenvalues: | 24.9483  |             | 29.5320  |              | 35.1058  |          |
| 23           | H        | Isotropic = | 30.4936  | Anisotropy = |          | 7.3982   |
| XX=          | 30.3319  | YX=         | -0.1204  | ZX=          | -4.2048  |          |
| XY=          | -0.0009  | YY=         | 30.9382  | ZY=          | -3.5604  |          |
| XZ=          | -3.3122  | YZ=         | -3.1491  | ZZ=          | 30.2107  |          |
| Eigenvalues: | 25.3272  |             | 30.7278  |              | 35.4257  |          |

|              |         |             |         |              |         |
|--------------|---------|-------------|---------|--------------|---------|
| 24           | H       | Isotropic = | 30.0627 | Anisotropy = | 8.4377  |
| XX=          | 32.6136 | YX=         | 1.4893  | ZX=          | 3.4176  |
| XY=          | 2.4847  | YY=         | 31.5559 | ZY=          | 2.2891  |
| XZ=          | 3.4668  | YZ=         | 1.3998  | ZZ=          | 26.0186 |
| Eigenvalues: | 24.4194 | 30.0809     | 35.6878 |              |         |
| 25           | H       | Isotropic = | 28.5521 | Anisotropy = | 6.0672  |
| XX=          | 24.7610 | YX=         | -0.9956 | ZX=          | -1.4109 |
| XY=          | -1.0798 | YY=         | 32.2709 | ZY=          | -0.1167 |
| XZ=          | 0.1320  | YZ=         | 1.6673  | ZZ=          | 28.6245 |
| Eigenvalues: | 24.5499 | 28.5096     | 32.5969 |              |         |
| 26           | H       | Isotropic = | 28.1742 | Anisotropy = | 5.5668  |
| XX=          | 25.8213 | YX=         | 1.0890  | ZX=          | 0.2336  |
| XY=          | -0.1932 | YY=         | 29.0548 | ZY=          | -1.8062 |
| XZ=          | -2.1684 | YZ=         | -2.8807 | ZZ=          | 29.6464 |
| Eigenvalues: | 25.5851 | 27.0520     | 31.8854 |              |         |
| 27           | H       | Isotropic = | 27.0581 | Anisotropy = | 4.3754  |
| XX=          | 25.4798 | YX=         | 0.1361  | ZX=          | -2.0824 |
| XY=          | -0.0620 | YY=         | 27.0002 | ZY=          | 1.0972  |
| XZ=          | -1.5938 | YZ=         | 1.4419  | ZZ=          | 28.6945 |
| Eigenvalues: | 24.5058 | 26.6936     | 29.9751 |              |         |
| 28           | H       | Isotropic = | 30.1616 | Anisotropy = | 7.8732  |
| XX=          | 30.5075 | YX=         | 0.6188  | ZX=          | 0.3846  |
| XY=          | 2.3474  | YY=         | 34.9594 | ZY=          | 0.0811  |
| XZ=          | 0.3855  | YZ=         | -0.0046 | ZZ=          | 25.0178 |
| Eigenvalues: | 24.9905 | 30.0839     | 35.4104 |              |         |
| 29           | H       | Isotropic = | 30.9756 | Anisotropy = | 10.2644 |
| XX=          | 29.3113 | YX=         | -2.4244 | ZX=          | -3.3753 |
| XY=          | -2.8839 | YY=         | 31.6034 | ZY=          | 4.5692  |
| XZ=          | -3.2318 | YZ=         | 3.2425  | ZZ=          | 32.0120 |
| Eigenvalues: | 27.0922 | 28.0159     | 37.8185 |              |         |
| 30           | H       | Isotropic = | 30.5678 | Anisotropy = | 8.7416  |
| XX=          | 30.2350 | YX=         | -2.8372 | ZX=          | 2.3606  |
| XY=          | -3.7194 | YY=         | 32.8339 | ZY=          | -2.6918 |
| XZ=          | 2.5853  | YZ=         | -1.6901 | ZZ=          | 28.6345 |
| Eigenvalues: | 26.8274 | 28.4805     | 36.3955 |              |         |
| 31           | H       | Isotropic = | 25.3649 | Anisotropy = | 6.9677  |
| XX=          | 28.1200 | YX=         | 2.3579  | ZX=          | -1.1602 |
| XY=          | 2.4401  | YY=         | 26.3850 | ZY=          | -0.7388 |
| XZ=          | -0.9135 | YZ=         | -0.8970 | ZZ=          | 21.5897 |
| Eigenvalues: | 21.3816 | 24.7030     | 30.0100 |              |         |
| 32           | H       | Isotropic = | 25.4421 | Anisotropy = | 7.3616  |
| XX=          | 30.0584 | YX=         | -0.4510 | ZX=          | -1.4845 |
| XY=          | -0.1294 | YY=         | 24.7393 | ZY=          | 0.1598  |
| XZ=          | -1.5943 | YZ=         | 0.6067  | ZZ=          | 21.5285 |
| Eigenvalues: | 21.2285 | 24.7479     | 30.3498 |              |         |
| 33           | H       | Isotropic = | 25.8220 | Anisotropy = | 20.4034 |
| XX=          | 38.3300 | YX=         | 2.2324  | ZX=          | -2.6027 |
| XY=          | 4.0679  | YY=         | 23.3589 | ZY=          | -1.6834 |
| XZ=          | -3.7435 | YZ=         | -0.1520 | ZZ=          | 15.7770 |
| Eigenvalues: | 15.3090 | 22.7327     | 39.4242 |              |         |
| 34           | H       | Isotropic = | 30.2411 | Anisotropy = | 15.2212 |
| XX=          | 37.0918 | YX=         | 6.6411  | ZX=          | -0.6093 |

|              |             |         |              |     |         |        |  |
|--------------|-------------|---------|--------------|-----|---------|--------|--|
| XY=          | 6.5591      | YY=     | 25.4438      | ZY= | -3.1307 |        |  |
| XZ=          | -0.9574     | YZ=     | -2.8560      | ZZ= | 28.1879 |        |  |
| Eigenvalues: | 21.5636     |         | 28.7712      |     | 40.3886 |        |  |
| 35 H         | Isotropic = | 29.8765 | Anisotropy = |     |         | 7.9141 |  |
| XX=          | 33.7554     | YX=     | -3.6277      | ZX= | -0.8139 |        |  |
| XY=          | -1.1158     | YY=     | 31.0086      | ZY= | -0.6566 |        |  |
| XZ=          | -0.8863     | YZ=     | -0.0831      | ZZ= | 24.8655 |        |  |
| Eigenvalues: | 24.7234     |         | 29.7536      |     | 35.1526 |        |  |
| 36 H         | Isotropic = | 29.4952 | Anisotropy = |     |         | 8.4210 |  |
| XX=          | 31.9604     | YX=     | 3.6862       | ZX= | 1.3050  |        |  |
| XY=          | 1.9593      | YY=     | 30.0573      | ZY= | 2.9690  |        |  |
| XZ=          | 1.7281      | YZ=     | 3.2446       | ZZ= | 26.4680 |        |  |
| Eigenvalues: | 24.6731     |         | 28.7033      |     | 35.1093 |        |  |
| 37 H         | Isotropic = | 29.3698 | Anisotropy = |     |         | 8.5394 |  |
| XX=          | 29.4217     | YX=     | 1.2052       | ZX= | -2.9153 |        |  |
| XY=          | 0.6053      | YY=     | 27.4504      | ZY= | -2.6590 |        |  |
| XZ=          | -3.9030     | YZ=     | -3.5079      | ZZ= | 31.2373 |        |  |
| Eigenvalues: | 25.4146     |         | 27.6320      |     | 35.0627 |        |  |
| 38 H         | Isotropic = | 29.9237 | Anisotropy = |     |         | 8.8630 |  |
| XX=          | 26.3412     | YX=     | -0.4034      | ZX= | -0.1816 |        |  |
| XY=          | -0.0014     | YY=     | 35.2892      | ZY= | 0.5701  |        |  |
| XZ=          | -0.0335     | YZ=     | 3.4964       | ZZ= | 28.1405 |        |  |
| Eigenvalues: | 26.3338     |         | 27.6049      |     | 35.8323 |        |  |
| 39 H         | Isotropic = | 29.5565 | Anisotropy = |     |         | 4.7984 |  |
| XX=          | 31.6906     | YX=     | 1.1465       | ZX= | -2.4728 |        |  |
| XY=          | 0.7065      | YY=     | 27.9327      | ZY= | 2.1929  |        |  |
| XZ=          | -1.4501     | YZ=     | 2.4629       | ZZ= | 29.0462 |        |  |
| Eigenvalues: | 25.4720     |         | 30.4421      |     | 32.7554 |        |  |
| 40 H         | Isotropic = | 29.8619 | Anisotropy = |     |         | 7.6026 |  |
| XX=          | 28.6343     | YX=     | -0.3210      | ZX= | 3.7537  |        |  |
| XY=          | -0.4708     | YY=     | 28.8981      | ZY= | 2.4443  |        |  |
| XZ=          | 3.8951      | YZ=     | 1.6851       | ZZ= | 32.0533 |        |  |
| Eigenvalues: | 25.4843     |         | 29.1711      |     | 34.9303 |        |  |
| 41 H         | Isotropic = | 26.2782 | Anisotropy = |     |         | 5.4468 |  |
| XX=          | 25.6519     | YX=     | 1.6650       | ZX= | -0.8015 |        |  |
| XY=          | 0.9213      | YY=     | 26.3512      | ZY= | -1.3133 |        |  |
| XZ=          | -0.4430     | YZ=     | -4.4586      | ZZ= | 26.8315 |        |  |
| Eigenvalues: | 23.5404     |         | 25.3848      |     | 29.9094 |        |  |
| 42 H         | Isotropic = | 26.4093 | Anisotropy = |     |         | 8.6002 |  |
| XX=          | 25.2545     | YX=     | 0.6860       | ZX= | -0.6607 |        |  |
| XY=          | 1.4516      | YY=     | 27.1650      | ZY= | -7.0566 |        |  |
| XZ=          | -1.2555     | YZ=     | -2.6516      | ZZ= | 26.8085 |        |  |
| Eigenvalues: | 22.1285     |         | 24.9567      |     | 32.1428 |        |  |

Number of frequencies: 120

harmonic frequencies in  $\text{cm}^{-1}$ , reduced masses in amu,

force constants in mDyne/A, and

normal modes in cartesian coordinates: 120

IR intensities in  $\text{km/mol}$

| vibration # | 1      | 2      | 3      | 4      | 5      | 6      |
|-------------|--------|--------|--------|--------|--------|--------|
| -----       |        |        |        |        |        |        |
| frequencies | 47.78  | 65.72  | 78.67  | 88.78  | 113.69 | 158.75 |
| intensities | 0.64   | 4.00   | 0.53   | 0.80   | 3.78   | 0.64   |
| reduc. mass | 1.26   | 1.06   | 1.11   | 1.51   | 1.53   | 0.48   |
| force const | 0.00   | 0.00   | 0.00   | 0.01   | 0.01   | 0.01   |
|             |        |        |        |        |        |        |
| vibration # | 7      | 8      | 9      | 10     | 11     | 12     |
| -----       |        |        |        |        |        |        |
| frequencies | 194.31 | 200.35 | 216.09 | 234.49 | 256.69 | 273.78 |
| intensities | 1.55   | 1.64   | 1.46   | 0.70   | 0.96   | 3.14   |
| reduc. mass | 0.71   | 0.24   | 0.87   | 1.01   | 0.78   | 1.12   |
| force const | 0.02   | 0.01   | 0.02   | 0.03   | 0.03   | 0.05   |
|             |        |        |        |        |        |        |
| vibration # | 13     | 14     | 15     | 16     | 17     | 18     |
| -----       |        |        |        |        |        |        |
| frequencies | 277.65 | 283.69 | 293.44 | 315.40 | 330.68 | 351.09 |
| intensities | 2.87   | 0.74   | 2.23   | 2.58   | 0.42   | 2.41   |
| reduc. mass | 0.33   | 0.75   | 0.22   | 0.50   | 0.91   | 1.23   |
| force const | 0.01   | 0.04   | 0.01   | 0.03   | 0.06   | 0.09   |
|             |        |        |        |        |        |        |
| vibration # | 19     | 20     | 21     | 22     | 23     | 24     |
| -----       |        |        |        |        |        |        |

|             |        |        |        |        |        |        |
|-------------|--------|--------|--------|--------|--------|--------|
| frequencies | 367.22 | 384.16 | 408.66 | 443.44 | 472.97 | 505.47 |
| intensities | 1.40   | 1.42   | 4.73   | 3.19   | 0.30   | 4.41   |
| reduc. mass | 1.04   | 1.17   | 0.69   | 1.57   | 0.73   | 0.55   |
| force const | 0.08   | 0.10   | 0.07   | 0.18   | 0.10   | 0.08   |

vibration #      25    26    27    28    29    30

-----

|             |        |        |        |        |        |        |
|-------------|--------|--------|--------|--------|--------|--------|
| frequencies | 529.23 | 539.31 | 548.37 | 562.61 | 602.61 | 621.07 |
| intensities | 19.12  | 0.24   | 8.81   | 8.57   | 67.07  | 144.09 |
| reduc. mass | 1.68   | 0.82   | 0.82   | 0.59   | 0.47   | 0.58   |
| force const | 0.28   | 0.14   | 0.15   | 0.11   | 0.10   | 0.13   |

vibration #      31    32    33    34    35    36

-----

|             |        |        |        |        |        |        |
|-------------|--------|--------|--------|--------|--------|--------|
| frequencies | 666.76 | 686.80 | 705.20 | 712.30 | 723.72 | 731.95 |
| intensities | 5.67   | 99.30  | 2.90   | 1.73   | 1.85   | 7.55   |
| reduc. mass | 0.87   | 0.60   | 1.47   | 0.29   | 1.11   | 1.29   |
| force const | 0.23   | 0.17   | 0.43   | 0.09   | 0.34   | 0.41   |

vibration #      37    38    39    40    41    42

-----

|             |        |        |        |        |        |        |
|-------------|--------|--------|--------|--------|--------|--------|
| frequencies | 755.12 | 776.89 | 821.93 | 848.12 | 851.01 | 905.25 |
| intensities | 9.42   | 7.13   | 25.79  | 1.04   | 2.38   | 3.75   |
| reduc. mass | 1.64   | 0.50   | 0.84   | 0.82   | 2.72   | 0.49   |
| force const | 0.55   | 0.18   | 0.34   | 0.35   | 1.16   | 0.24   |

vibration #      43    44    45    46    47    48

-----

|             |        |        |        |        |        |         |
|-------------|--------|--------|--------|--------|--------|---------|
| frequencies | 928.58 | 937.21 | 945.81 | 978.04 | 991.96 | 1019.28 |
|-------------|--------|--------|--------|--------|--------|---------|

|             |      |      |      |       |      |      |
|-------------|------|------|------|-------|------|------|
| intensities | 3.26 | 3.30 | 5.48 | 14.24 | 7.82 | 3.52 |
| reduc. mass | 0.57 | 0.43 | 0.61 | 0.39  | 0.30 | 0.30 |
| force const | 0.29 | 0.22 | 0.32 | 0.22  | 0.17 | 0.18 |

vibration #      49    50    51    52    53    54

-----

|             |         |         |         |         |         |         |
|-------------|---------|---------|---------|---------|---------|---------|
| frequencies | 1029.45 | 1035.74 | 1047.16 | 1054.47 | 1074.17 | 1088.48 |
| intensities | 25.66   | 5.92    | 5.90    | 3.60    | 85.03   | 26.92   |
| reduc. mass | 0.54    | 0.64    | 0.34    | 0.22    | 0.40    | 0.95    |
| force const | 0.34    | 0.40    | 0.22    | 0.15    | 0.27    | 0.66    |

vibration #      55    56    57    58    59    60

-----

|             |         |         |         |         |         |         |
|-------------|---------|---------|---------|---------|---------|---------|
| frequencies | 1099.17 | 1125.46 | 1131.08 | 1161.06 | 1186.33 | 1212.55 |
| intensities | 4.70    | 14.16   | 79.74   | 17.02   | 9.22    | 89.03   |
| reduc. mass | 0.60    | 0.71    | 0.56    | 0.44    | 0.86    | 1.37    |
| force const | 0.42    | 0.53    | 0.42    | 0.35    | 0.72    | 1.18    |

vibration #      61    62    63    64    65    66

-----

|             |         |         |         |         |         |         |
|-------------|---------|---------|---------|---------|---------|---------|
| frequencies | 1221.39 | 1250.85 | 1252.85 | 1273.27 | 1292.88 | 1311.65 |
| intensities | 15.24   | 15.39   | 170.83  | 3.14    | 64.20   | 14.12   |
| reduc. mass | 0.73    | 0.35    | 1.14    | 0.32    | 0.98    | 0.76    |
| force const | 0.64    | 0.33    | 1.05    | 0.31    | 0.97    | 0.77    |

vibration #      67    68    69    70    71    72

-----

|             |         |         |         |         |         |         |
|-------------|---------|---------|---------|---------|---------|---------|
| frequencies | 1373.79 | 1401.02 | 1409.64 | 1436.55 | 1450.41 | 1469.80 |
| intensities | 47.41   | 152.69  | 353.07  | 22.19   | 57.97   | 118.72  |

|             |      |      |      |      |      |      |
|-------------|------|------|------|------|------|------|
| reduc. mass | 0.43 | 0.65 | 0.92 | 0.38 | 3.34 | 0.73 |
| force const | 0.48 | 0.75 | 1.08 | 0.47 | 4.14 | 0.93 |

vibration #      73    74    75    76    77    78

-----

|             |         |         |         |         |         |         |
|-------------|---------|---------|---------|---------|---------|---------|
| frequencies | 1501.56 | 1506.13 | 1509.16 | 1520.20 | 1526.45 | 1540.32 |
|-------------|---------|---------|---------|---------|---------|---------|

|             |      |       |       |       |        |       |
|-------------|------|-------|-------|-------|--------|-------|
| intensities | 7.98 | 32.05 | 20.13 | 37.70 | 212.12 | 51.33 |
|-------------|------|-------|-------|-------|--------|-------|

|             |      |      |      |      |      |      |
|-------------|------|------|------|------|------|------|
| reduc. mass | 0.60 | 0.48 | 2.29 | 2.15 | 0.95 | 0.99 |
|-------------|------|------|------|------|------|------|

|             |      |      |      |      |      |      |
|-------------|------|------|------|------|------|------|
| force const | 0.80 | 0.65 | 3.07 | 2.93 | 1.31 | 1.39 |
|-------------|------|------|------|------|------|------|

vibration #      79    80    81    82    83    84

-----

|             |         |         |         |         |         |         |
|-------------|---------|---------|---------|---------|---------|---------|
| frequencies | 1563.04 | 1583.92 | 1592.60 | 1626.61 | 1631.61 | 1639.60 |
|-------------|---------|---------|---------|---------|---------|---------|

|             |      |       |       |        |       |       |
|-------------|------|-------|-------|--------|-------|-------|
| intensities | 4.59 | 17.96 | 27.97 | 102.32 | 56.81 | 33.79 |
|-------------|------|-------|-------|--------|-------|-------|

|             |      |      |      |      |      |      |
|-------------|------|------|------|------|------|------|
| reduc. mass | 0.59 | 0.80 | 0.52 | 0.33 | 0.35 | 0.21 |
|-------------|------|------|------|------|------|------|

|             |      |      |      |      |      |      |
|-------------|------|------|------|------|------|------|
| force const | 0.85 | 1.18 | 0.78 | 0.52 | 0.55 | 0.33 |
|-------------|------|------|------|------|------|------|

vibration #      85    86    87    88    89    90

-----

|             |         |         |         |         |         |         |
|-------------|---------|---------|---------|---------|---------|---------|
| frequencies | 1642.50 | 1654.69 | 1660.87 | 1662.93 | 1665.93 | 1666.86 |
|-------------|---------|---------|---------|---------|---------|---------|

|             |       |       |       |       |       |      |
|-------------|-------|-------|-------|-------|-------|------|
| intensities | 20.54 | 28.72 | 29.80 | 26.10 | 12.16 | 8.47 |
|-------------|-------|-------|-------|-------|-------|------|

|             |      |      |      |      |      |      |
|-------------|------|------|------|------|------|------|
| reduc. mass | 0.49 | 0.58 | 0.34 | 0.19 | 0.14 | 0.17 |
|-------------|------|------|------|------|------|------|

|             |      |      |      |      |      |      |
|-------------|------|------|------|------|------|------|
| force const | 0.78 | 0.93 | 0.56 | 0.32 | 0.23 | 0.28 |
|-------------|------|------|------|------|------|------|

vibration #      91    92    93    94    95    96

-----

|             |         |         |         |         |         |         |
|-------------|---------|---------|---------|---------|---------|---------|
| frequencies | 1669.57 | 1670.47 | 1671.88 | 1693.26 | 1695.93 | 1804.97 |
|-------------|---------|---------|---------|---------|---------|---------|

|             |       |       |      |        |       |         |
|-------------|-------|-------|------|--------|-------|---------|
| intensities | 12.27 | 28.36 | 6.59 | 177.83 | 59.18 | 1049.82 |
|-------------|-------|-------|------|--------|-------|---------|

|             |      |      |      |      |      |      |
|-------------|------|------|------|------|------|------|
| reduc. mass | 0.26 | 0.19 | 0.17 | 1.27 | 0.84 | 1.49 |
|-------------|------|------|------|------|------|------|

force const 0.42 0.30 0.29 2.14 1.42 2.87

vibration # 97 98 99 100 101 102

-----

frequencies 1835.05 1887.99 3021.16 3024.10 3058.54 3065.60

intensities 457.45 19.71 291.66 405.38 141.80 743.89

reduc. mass 1.35 0.85 0.33 0.33 0.43 0.47

force const 2.69 1.78 1.78 1.75 2.39 2.58

vibration # 103 104 105 106 107 108

-----

frequencies 3073.13 3083.03 3091.45 3096.15 3107.63 3124.38

intensities 1103.54 54.75 296.84 451.59 56.96 531.23

reduc. mass 0.19 0.57 0.31 0.30 0.82 0.42

force const 1.07 3.18 1.74 1.72 4.68 2.40

vibration # 109 110 111 112 113 114

-----

frequencies 3127.71 3134.12 3140.39 3141.05 3144.94 3146.32

intensities 318.56 57.35 392.87 682.17 248.93 331.72

reduc. mass 0.54 0.40 0.54 0.38 0.33 0.57

force const 3.10 2.32 3.12 2.20 1.93 3.34

vibration # 115 116 117 118 119 120

-----

frequencies 3147.88 3154.81 3159.61 3196.54 3824.15 3831.35

intensities 299.76 327.42 298.02 341.54 369.73 18.36

reduc. mass 0.49 0.86 0.84 0.56 0.93 0.93

force const 2.89 5.05 4.91 3.36 8.03 8.06



Number of imaginary frequencies: 0

### Conformation 3

Boltzmann Population = 18.9% (relative energy = 0.58 kcal/mol)

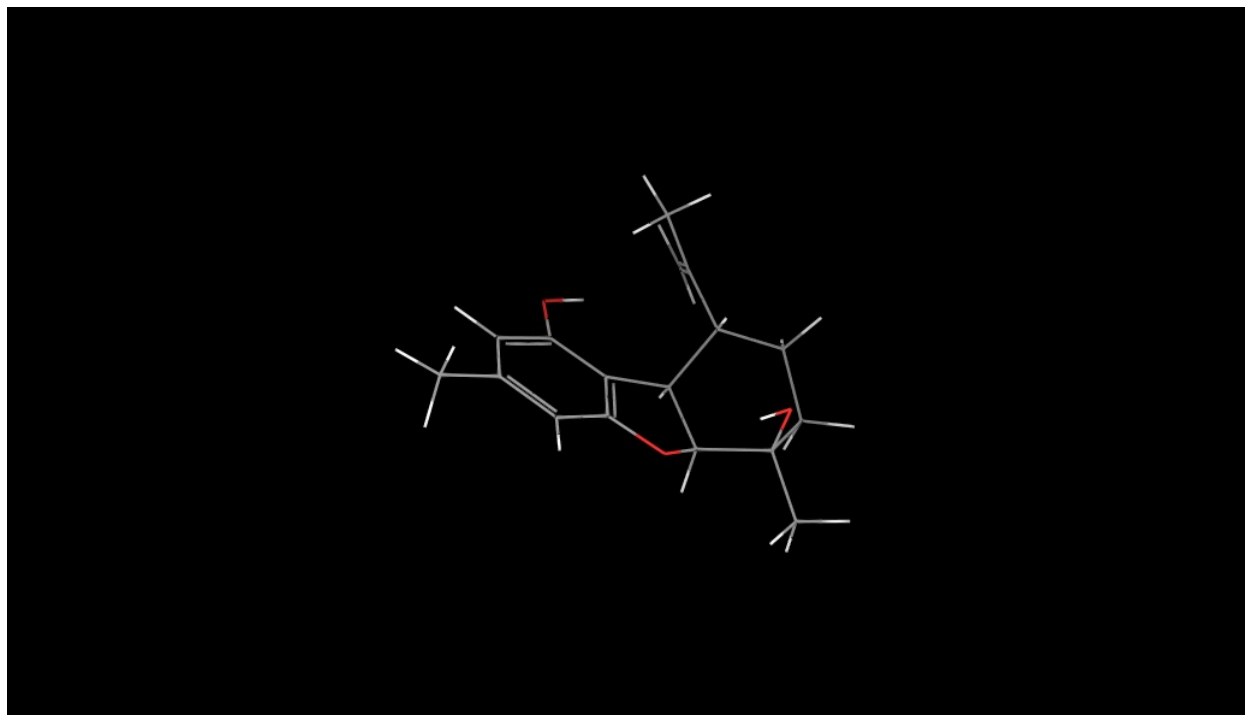

Geometries and Energy Method: M06-2X-D3/6-31G(d,p)

NMR Method: mPW1PW91/6-311+G(2d,p)

Thermodynamic properties for P = 1.00 atm, calculated at 1 temperatures

T = 298.15 K, P = 1.00 atm

Total internal energy,  $U_{\text{tot}}(\text{SCFE} + \text{ZPE} + U)$ : -885.983134 hartrees

Total enthalpy,  $H_{\text{tot}}(U_{\text{tot}} + pV)$ : -885.982189 hartrees

Total Gibbs free energy,  $G_{\text{tot}}(H_{\text{tot}} - T^*S)$ : -886.044710 hartrees

Optimized Geometry:

| Center Number | Atomic Number | Atomic Type | Coordinates (Angstroms) |          |          |
|---------------|---------------|-------------|-------------------------|----------|----------|
|               |               |             | X                       | Y        | Z        |
| 1             | 6             | 0           | -3.460700               | 2.255900 | 1.040900 |
| 2             | 6             | 0           | -3.511700               | 1.321300 | 2.264000 |
| 3             | 6             | 0           | -4.908700               | 1.229100 | 2.918500 |
| 4             | 6             | 0           | -5.660900               | 2.575000 | 2.793400 |

|    |   |   |            |           |           |
|----|---|---|------------|-----------|-----------|
| 5  | 6 | 0 | -5.789500  | 3.028600  | 1.315000  |
| 6  | 6 | 0 | -4.808000  | 2.366800  | 0.333500  |
| 7  | 6 | 0 | -4.716200  | 3.183600  | -0.953700 |
| 8  | 6 | 0 | -4.859900  | 0.765000  | 4.365000  |
| 9  | 6 | 0 | -7.122600  | 2.517300  | 3.183200  |
| 10 | 6 | 0 | -7.892400  | 2.567500  | 2.021700  |
| 11 | 6 | 0 | -7.780600  | 2.416200  | 4.405400  |
| 12 | 6 | 0 | -9.181000  | 2.352200  | 4.422300  |
| 13 | 6 | 0 | -9.921300  | 2.384900  | 3.245300  |
| 14 | 6 | 0 | -9.270800  | 2.498900  | 2.007900  |
| 15 | 8 | 0 | -7.147000  | 2.378900  | 5.602000  |
| 16 | 8 | 0 | -7.128700  | 2.709100  | 0.893500  |
| 17 | 8 | 0 | -5.233900  | 1.048300  | 0.034300  |
| 18 | 6 | 0 | -11.425500 | 2.288500  | 3.285800  |
| 19 | 6 | 0 | -5.765200  | -0.384600 | 4.712500  |
| 20 | 6 | 0 | -4.091800  | 1.365200  | 5.282200  |
| 21 | 1 | 0 | -3.163000  | 3.267800  | 1.343600  |
| 22 | 1 | 0 | -2.708600  | 1.907700  | 0.326400  |
| 23 | 1 | 0 | -2.776700  | 1.659400  | 3.000200  |
| 24 | 1 | 0 | -3.215100  | 0.311600  | 1.968800  |
| 25 | 1 | 0 | -5.490400  | 0.499800  | 2.348000  |
| 26 | 1 | 0 | -5.108700  | 3.333400  | 3.363700  |
| 27 | 1 | 0 | -5.677100  | 4.119600  | 1.259600  |
| 28 | 1 | 0 | -4.083500  | 2.658800  | -1.673200 |
| 29 | 1 | 0 | -5.711700  | 3.311300  | -1.390300 |
| 30 | 1 | 0 | -4.293900  | 4.175800  | -0.767400 |
| 31 | 1 | 0 | -9.672400  | 2.275600  | 5.386500  |
| 32 | 1 | 0 | -9.822100  | 2.550100  | 1.075600  |
| 33 | 1 | 0 | -6.190400  | 2.296900  | 5.467000  |
| 34 | 1 | 0 | -6.185100  | 1.103800  | -0.135700 |
| 35 | 1 | 0 | -11.804700 | 2.415100  | 4.301500  |
| 36 | 1 | 0 | -11.884700 | 3.050900  | 2.650300  |
| 37 | 1 | 0 | -11.760400 | 1.313000  | 2.919600  |
| 38 | 1 | 0 | -5.742300  | -0.617800 | 5.779000  |
| 39 | 1 | 0 | -6.797300  | -0.157500 | 4.423000  |
| 40 | 1 | 0 | -5.465200  | -1.275200 | 4.149100  |
| 41 | 1 | 0 | -4.083900  | 1.031500  | 6.315700  |
| 42 | 1 | 0 | -3.433000  | 2.192000  | 5.030100  |

-----

SCF GIAO Magnetic shielding tensor (ppm):

|              |   |             |          |              |          |
|--------------|---|-------------|----------|--------------|----------|
| 1            | C | Isotropic = | 154.1725 | Anisotropy = | 27.6606  |
| XX=          |   |             | 152.2476 | YX=          | 5.8198   |
|              |   |             |          | ZX=          | -9.0861  |
| XY=          |   |             | 2.9602   | YY=          | 171.1695 |
|              |   |             |          | ZY=          | -3.6269  |
| XZ=          |   |             | -4.7948  | ZZ=          | 139.1005 |
|              |   |             |          |              |          |
| Eigenvalues: |   |             | 136.1071 | 153.7976     | 172.6130 |
| 2            | C | Isotropic = | 157.7120 | Anisotropy = | 25.0096  |
| XX=          |   |             | 173.3900 | YX=          | -2.9543  |
|              |   |             |          | ZX=          | -3.1331  |
| XY=          |   |             | -2.6914  | YY=          | 165.5023 |
|              |   |             |          | ZY=          | -0.5512  |

|              |             |          |              |     |          |          |
|--------------|-------------|----------|--------------|-----|----------|----------|
| XZ=          | -2.9920     | YZ=      | -6.4587      | ZZ= | 134.2437 |          |
| Eigenvalues: | 133.5715    |          | 165.1794     |     | 174.3851 |          |
| 3 C          | Isotropic = | 142.6605 | Anisotropy = |     |          | 14.5324  |
| XX=          | 147.4539    | YX=      | -7.6557      | ZX= | 3.9006   |          |
| XY=          | 0.4232      | YY=      | 148.7291     | ZY= | 1.2085   |          |
| XZ=          | 8.3165      | YZ=      | 0.8161       | ZZ= | 131.7984 |          |
| Eigenvalues: | 129.4548    |          | 146.1778     |     | 152.3487 |          |
| 4 C          | Isotropic = | 133.5223 | Anisotropy = |     |          | 27.1284  |
| XX=          | 132.1411    | YX=      | 6.2404       | ZX= | 2.3376   |          |
| XY=          | -5.4240     | YY=      | 149.4688     | ZY= | -0.2730  |          |
| XZ=          | 6.5794      | YZ=      | 16.5039      | ZZ= | 118.9569 |          |
| Eigenvalues: | 115.8328    |          | 133.1261     |     | 151.6078 |          |
| 5 C          | Isotropic = | 96.7720  | Anisotropy = |     |          | 57.9141  |
| XX=          | 118.7601    | YX=      | 14.6264      | ZX= | -13.3361 |          |
| XY=          | 12.5933     | YY=      | 101.2086     | ZY= | -20.2967 |          |
| XZ=          | -22.1656    | YZ=      | -15.7831     | ZZ= | 70.3474  |          |
| Eigenvalues: | 59.9046     |          | 95.0301      |     | 135.3814 |          |
| 6 C          | Isotropic = | 116.4127 | Anisotropy = |     |          | 47.9678  |
| XX=          | 96.8968     | YX=      | -5.2830      | ZX= | -11.8553 |          |
| XY=          | -2.4355     | YY=      | 105.6215     | ZY= | -1.4160  |          |
| XZ=          | -6.4629     | YZ=      | 2.7255       | ZZ= | 146.7198 |          |
| Eigenvalues: | 94.0861     |          | 106.7608     |     | 148.3912 |          |
| 7 C          | Isotropic = | 157.6746 | Anisotropy = |     |          | 46.4857  |
| XX=          | 145.0811    | YX=      | -20.2426     | ZX= | -4.3571  |          |
| XY=          | -22.2494    | YY=      | 172.9235     | ZY= | 13.9231  |          |
| XZ=          | 0.2492      | YZ=      | 10.9558      | ZZ= | 155.0193 |          |
| Eigenvalues: | 132.7383    |          | 151.6204     |     | 188.6651 |          |
| 8 C          | Isotropic = | 13.8137  | Anisotropy = |     |          | 216.7860 |
| XX=          | 55.5831     | YX=      | 80.8758      | ZX= | 100.6059 |          |
| XY=          | 82.5178     | YY=      | -16.0730     | ZY= | -12.6299 |          |
| XZ=          | 105.7917    | YZ=      | 0.5184       | ZZ= | 1.9310   |          |
| Eigenvalues: | -113.9928   |          | -2.9039      |     | 158.3377 |          |
| 9 C          | Isotropic = | 72.6367  | Anisotropy = |     |          | 100.8398 |
| XX=          | 26.4810     | YX=      | 2.9680       | ZX= | 12.8743  |          |
| XY=          | -19.1105    | YY=      | 64.9952      | ZY= | 27.2377  |          |
| XZ=          | 19.9918     | YZ=      | 32.3999      | ZZ= | 126.4339 |          |
| Eigenvalues: | 19.6267     |          | 58.4202      |     | 139.8632 |          |
| 10 C         | Isotropic = | 20.3776  | Anisotropy = |     |          | 104.6143 |
| XX=          | -25.7198    | YX=      | 38.9479      | ZX= | 6.6319   |          |
| XY=          | 52.3914     | YY=      | 1.2726       | ZY= | 17.8651  |          |
| XZ=          | 0.3370      | YZ=      | 14.8404      | ZZ= | 85.5802  |          |
| Eigenvalues: | -60.1873    |          | 31.1996      |     | 90.1205  |          |
| 11 C         | Isotropic = | 26.4718  | Anisotropy = |     |          | 137.8086 |
| XX=          | 12.6518     | YX=      | -8.9369      | ZX= | 14.8176  |          |
| XY=          | -0.3570     | YY=      | -34.8247     | ZY= | 49.1798  |          |
| XZ=          | 16.4653     | YZ=      | 46.1950      | ZZ= | 101.5884 |          |
| Eigenvalues: | -51.1710    |          | 12.2423      |     | 118.3442 |          |
| 12 C         | Isotropic = | 73.9620  | Anisotropy = |     |          | 113.1677 |
| XX=          | 26.2077     | YX=      | 35.7812      | ZX= | 3.8654   |          |
| XY=          | 45.3762     | YY=      | 54.9430      | ZY= | 24.8524  |          |
| XZ=          | 9.0625      | YZ=      | 22.8809      | ZZ= | 140.7351 |          |
| Eigenvalues: | -2.9968     |          | 75.4756      |     | 149.4071 |          |

|              |          |             |          |              |          |
|--------------|----------|-------------|----------|--------------|----------|
| 13           | C        | Isotropic = | 40.6728  | Anisotropy = | 194.2800 |
| XX=          | -42.6797 | YX=         | -12.0101 | ZX=          | 30.9845  |
| XY=          | -18.6943 | YY=         | 14.5410  | ZY=          | 52.3430  |
| XZ=          | 28.9888  | YZ=         | 50.8473  | ZZ=          | 150.1573 |
| Eigenvalues: | -56.0880 |             | 7.9137   |              | 170.1929 |
| 14           | C        | Isotropic = | 82.3662  | Anisotropy = | 121.3217 |
| XX=          | 77.8554  | YX=         | 6.0723   | ZX=          | 10.6754  |
| XY=          | -6.0347  | YY=         | 20.3481  | ZY=          | 44.0044  |
| XZ=          | 17.7827  | YZ=         | 38.7447  | ZZ=          | 148.8951 |
| Eigenvalues: | 7.9500   |             | 75.9012  |              | 163.2474 |
| 15           | O        | Isotropic = | 197.1835 | Anisotropy = | 82.5281  |
| XX=          | 141.8867 | YX=         | 14.7559  | ZX=          | 5.9712   |
| XY=          | 10.9897  | YY=         | 202.8006 | ZY=          | 9.3789   |
| XZ=          | 33.4748  | YZ=         | -32.6188 | ZZ=          | 246.8631 |
| Eigenvalues: | 135.0604 |             | 204.2879 |              | 252.2022 |
| 16           | O        | Isotropic = | 194.5531 | Anisotropy = | 110.7845 |
| XX=          | 221.2796 | YX=         | -71.4995 | ZX=          | 23.2398  |
| XY=          | -42.8007 | YY=         | 179.5123 | ZY=          | 18.4670  |
| XZ=          | 26.1362  | YZ=         | -34.0355 | ZZ=          | 182.8673 |
| Eigenvalues: | 138.0367 |             | 177.2132 |              | 268.4095 |
| 17           | O        | Isotropic = | 267.2998 | Anisotropy = | 29.1214  |
| XX=          | 273.0013 | YX=         | 3.8594   | ZX=          | -21.0336 |
| XY=          | 3.0167   | YY=         | 267.5295 | ZY=          | 17.7127  |
| XZ=          | -16.2474 | YZ=         | -9.0547  | ZZ=          | 261.3686 |
| Eigenvalues: | 246.2255 |             | 268.9598 |              | 286.7141 |
| 18           | C        | Isotropic = | 163.9429 | Anisotropy = | 41.3583  |
| XX=          | 186.8799 | YX=         | 7.8632   | ZX=          | -4.8079  |
| XY=          | 10.7634  | YY=         | 158.9244 | ZY=          | -4.8449  |
| XZ=          | -10.8104 | YZ=         | -6.1404  | ZZ=          | 146.0244 |
| Eigenvalues: | 143.5310 |             | 156.7827 |              | 191.5151 |
| 19           | C        | Isotropic = | 157.1110 | Anisotropy = | 42.7428  |
| XX=          | 156.5339 | YX=         | -13.0346 | ZX=          | -18.3494 |
| XY=          | -9.9916  | YY=         | 154.1661 | ZY=          | 9.8659   |
| XZ=          | -19.5068 | YZ=         | 12.0223  | ZZ=          | 160.6331 |
| Eigenvalues: | 139.3532 |             | 146.3736 |              | 185.6062 |
| 20           | C        | Isotropic = | 72.7562  | Anisotropy = | 131.0925 |
| XX=          | 90.9010  | YX=         | 65.3244  | ZX=          | 60.2199  |
| XY=          | 71.2462  | YY=         | 38.9352  | ZY=          | -24.4865 |
| XZ=          | 60.8554  | YZ=         | -31.2513 | ZZ=          | 88.4325  |
| Eigenvalues: | -36.0210 |             | 94.1385  |              | 160.1512 |
| 21           | H        | Isotropic = | 30.3672  | Anisotropy = | 8.0415   |
| XX=          | 28.7084  | YX=         | -0.2526  | ZX=          | -4.3390  |
| XY=          | -0.0063  | YY=         | 29.7057  | ZY=          | -0.5504  |
| XZ=          | -4.7159  | YZ=         | -1.3216  | ZZ=          | 32.6874  |
| Eigenvalues: | 25.6564  |             | 29.7170  |              | 35.7282  |
| 22           | H        | Isotropic = | 29.8871  | Anisotropy = | 8.8432   |
| XX=          | 35.3817  | YX=         | -1.5746  | ZX=          | 1.1184   |
| XY=          | -1.2712  | YY=         | 29.4155  | ZY=          | 0.4425   |
| XZ=          | 1.0043   | YZ=         | 0.5612   | ZZ=          | 24.8639  |
| Eigenvalues: | 24.6681  |             | 29.2105  |              | 35.7825  |
| 23           | H        | Isotropic = | 30.2895  | Anisotropy = | 8.5164   |
| XX=          | 30.2066  | YX=         | 0.9518   | ZX=          | -2.7137  |

|              |             |         |              |     |         |         |
|--------------|-------------|---------|--------------|-----|---------|---------|
| XY=          | 0.9213      | YY=     | 34.6592      | ZY= | -3.0006 |         |
| XZ=          | -1.5544     | YZ=     | -2.8175      | ZZ= | 26.0028 |         |
| Eigenvalues: | 24.5428     |         | 30.3587      |     | 35.9671 |         |
| 24 H         | Isotropic = | 29.7492 | Anisotropy = |     |         | 9.0256  |
| XX=          | 31.2132     | YX=     | 0.4423       | ZX= | 4.0339  |         |
| XY=          | 1.1228      | YY=     | 28.2493      | ZY= | 3.6270  |         |
| XZ=          | 4.3266      | YZ=     | 2.8915       | ZZ= | 29.7852 |         |
| Eigenvalues: | 24.8035     |         | 28.6779      |     | 35.7663 |         |
| 25 H         | Isotropic = | 28.7614 | Anisotropy = |     |         | 4.8193  |
| XX=          | 27.5891     | YX=     | -3.4710      | ZX= | -1.3561 |         |
| XY=          | -2.3473     | YY=     | 29.7616      | ZY= | -0.4322 |         |
| XZ=          | -0.3456     | YZ=     | 1.1064       | ZZ= | 28.9335 |         |
| Eigenvalues: | 25.4933     |         | 28.8166      |     | 31.9742 |         |
| 26 H         | Isotropic = | 28.6601 | Anisotropy = |     |         | 4.3274  |
| XX=          | 27.5029     | YX=     | 0.3708       | ZX= | 0.7485  |         |
| XY=          | -1.4231     | YY=     | 28.3705      | ZY= | -1.7014 |         |
| XZ=          | -0.5590     | YZ=     | -2.4978      | ZZ= | 30.1068 |         |
| Eigenvalues: | 26.7595     |         | 27.6757      |     | 31.5451 |         |
| 27 H         | Isotropic = | 27.3982 | Anisotropy = |     |         | 4.8249  |
| XX=          | 25.9009     | YX=     | -0.1592      | ZX= | -1.4208 |         |
| XY=          | -1.2792     | YY=     | 27.5440      | ZY= | 0.9366  |         |
| XZ=          | -2.2381     | YZ=     | 2.2039       | ZZ= | 28.7497 |         |
| Eigenvalues: | 25.0058     |         | 26.5741      |     | 30.6148 |         |
| 28 H         | Isotropic = | 30.5931 | Anisotropy = |     |         | 9.2333  |
| XX=          | 33.2577     | YX=     | -3.3522      | ZX= | 2.1627  |         |
| XY=          | -4.6680     | YY=     | 30.8810      | ZY= | -1.3244 |         |
| XZ=          | 1.9706      | YZ=     | -0.2341      | ZZ= | 27.6405 |         |
| Eigenvalues: | 26.8142     |         | 28.2165      |     | 36.7486 |         |
| 29 H         | Isotropic = | 30.0966 | Anisotropy = |     |         | 8.2867  |
| XX=          | 29.5069     | YX=     | -0.3320      | ZX= | -0.5755 |         |
| XY=          | 0.9775      | YY=     | 35.5739      | ZY= | 0.0466  |         |
| XZ=          | -0.4764     | YZ=     | 1.1272       | ZZ= | 25.2090 |         |
| Eigenvalues: | 25.1087     |         | 29.5601      |     | 35.6211 |         |
| 30 H         | Isotropic = | 30.8967 | Anisotropy = |     |         | 9.9082  |
| XX=          | 28.6722     | YX=     | -2.0410      | ZX= | -3.2047 |         |
| XY=          | -2.2620     | YY=     | 30.3062      | ZY= | 3.8808  |         |
| XZ=          | -3.3679     | YZ=     | 2.7952       | ZZ= | 33.7117 |         |
| Eigenvalues: | 26.9178     |         | 28.2702      |     | 37.5022 |         |
| 31 H         | Isotropic = | 25.3128 | Anisotropy = |     |         | 6.8043  |
| XX=          | 27.3472     | YX=     | 2.3768       | ZX= | -0.8955 |         |
| XY=          | 2.5260      | YY=     | 26.3886      | ZY= | -1.8573 |         |
| XZ=          | -0.5577     | YZ=     | -2.3290      | ZZ= | 22.2026 |         |
| Eigenvalues: | 21.3211     |         | 24.7683      |     | 29.8490 |         |
| 32 H         | Isotropic = | 25.3739 | Anisotropy = |     |         | 7.3553  |
| XX=          | 30.1253     | YX=     | 0.2003       | ZX= | -0.9467 |         |
| XY=          | 0.6590      | YY=     | 24.6116      | ZY= | -0.9270 |         |
| XZ=          | -0.9951     | YZ=     | -0.5238      | ZZ= | 21.3848 |         |
| Eigenvalues: | 21.1461     |         | 24.6982      |     | 30.2775 |         |
| 33 H         | Isotropic = | 25.8573 | Anisotropy = |     |         | 19.0741 |
| XX=          | 36.2243     | YX=     | 4.3341       | ZX= | 3.1681  |         |
| XY=          | 6.3461      | YY=     | 25.2543      | ZY= | -2.0794 |         |
| XZ=          | 1.9104      | YZ=     | 0.1851       | ZZ= | 16.0934 |         |

|              |             |         |              |         |         |
|--------------|-------------|---------|--------------|---------|---------|
| Eigenvalues: | 15.4776     | 23.5209 | 38.5734      |         |         |
| 34 H         | Isotropic = | 29.9865 | Anisotropy = | 15.4297 |         |
| XX=          | 33.9979     | YX=     | 7.3937       | ZX=     | -1.2842 |
| XY=          | 7.3651      | YY=     | 26.7841      | ZY=     | -5.2835 |
| XZ=          | -2.1535     | YZ=     | -4.9723      | ZZ=     | 29.1774 |
| Eigenvalues: | 20.6186     | 29.0679 | 40.2730      |         |         |
| 35 H         | Isotropic = | 29.8433 | Anisotropy = | 7.9189  |         |
| XX=          | 34.5408     | YX=     | -2.7091      | ZX=     | 1.1332  |
| XY=          | -0.2554     | YY=     | 29.5298      | ZY=     | -2.0753 |
| XZ=          | 0.4615      | YZ=     | -1.7530      | ZZ=     | 25.4593 |
| Eigenvalues: | 24.6966     | 29.7107 | 35.1226      |         |         |
| 36 H         | Isotropic = | 29.4757 | Anisotropy = | 8.4055  |         |
| XX=          | 30.6237     | YX=     | 3.6062       | ZX=     | 0.2051  |
| XY=          | 2.0724      | YY=     | 32.6351      | ZY=     | 1.8319  |
| XZ=          | 1.0639      | YZ=     | 2.3536       | ZZ=     | 25.1683 |
| Eigenvalues: | 24.6197     | 28.7281 | 35.0794      |         |         |
| 37 H         | Isotropic = | 29.3396 | Anisotropy = | 8.5548  |         |
| XX=          | 29.5743     | YX=     | 1.2540       | ZX=     | -3.0423 |
| XY=          | 0.4056      | YY=     | 26.3529      | ZY=     | -1.8510 |
| XZ=          | -3.6053     | YZ=     | -2.7878      | ZZ=     | 32.0915 |
| Eigenvalues: | 25.4905     | 27.4854 | 35.0428      |         |         |
| 38 H         | Isotropic = | 29.9323 | Anisotropy = | 8.5127  |         |
| XX=          | 28.5070     | YX=     | -3.8541      | ZX=     | -0.7862 |
| XY=          | -2.4009     | YY=     | 33.3500      | ZY=     | 0.6008  |
| XZ=          | -1.5658     | YZ=     | 3.4916       | ZZ=     | 27.9400 |
| Eigenvalues: | 26.9030     | 27.2865 | 35.6074      |         |         |
| 39 H         | Isotropic = | 30.0183 | Anisotropy = | 5.5414  |         |
| XX=          | 31.4595     | YX=     | 2.8409       | ZX=     | -1.6541 |
| XY=          | 2.1429      | YY=     | 30.1155      | ZY=     | 2.1188  |
| XZ=          | -0.0886     | YZ=     | 3.8669       | ZZ=     | 28.4799 |
| Eigenvalues: | 25.3575     | 30.9849 | 33.7126      |         |         |
| 40 H         | Isotropic = | 30.0000 | Anisotropy = | 8.0622  |         |
| XX=          | 27.7093     | YX=     | -0.6395      | ZX=     | 1.4442  |
| XY=          | -0.7557     | YY=     | 27.9598      | ZY=     | 2.5687  |
| XZ=          | 1.9675      | YZ=     | 2.1613       | ZZ=     | 34.3309 |
| Eigenvalues: | 26.1263     | 28.4988 | 35.3748      |         |         |
| 41 H         | Isotropic = | 26.3089 | Anisotropy = | 5.5550  |         |
| XX=          | 25.0944     | YX=     | 2.3183       | ZX=     | -0.5562 |
| XY=          | 1.0603      | YY=     | 27.9908      | ZY=     | -1.2219 |
| XZ=          | 0.6868      | YZ=     | -3.7257      | ZZ=     | 25.8416 |
| Eigenvalues: | 23.4811     | 25.4335 | 30.0123      |         |         |
| 42 H         | Isotropic = | 26.3621 | Anisotropy = | 8.4296  |         |
| XX=          | 25.2424     | YX=     | 0.3389       | ZX=     | 0.8305  |
| XY=          | 2.5440      | YY=     | 29.1166      | ZY=     | -6.4641 |
| XZ=          | -0.2171     | YZ=     | -2.2727      | ZZ=     | 24.7272 |
| Eigenvalues: | 21.7287     | 25.3757 | 31.9819      |         |         |

Number of frequencies: 120

harmonic frequencies in  $\text{cm}^{-1}$ , reduced masses in amu,

force constants in mDyne/A, and

normal modes in cartesian coordinates: 120

IR intensities in  $\text{km/mol}$

|             |        |        |        |        |        |        |
|-------------|--------|--------|--------|--------|--------|--------|
| vibration # | 1      | 2      | 3      | 4      | 5      | 6      |
| -----       |        |        |        |        |        |        |
| frequencies | 52.62  | 74.49  | 82.55  | 95.16  | 115.88 | 153.11 |
| intensities | 0.49   | 1.31   | 1.06   | 0.02   | 2.60   | 2.00   |
| reduc. mass | 1.18   | 0.78   | 0.26   | 0.86   | 1.89   | 1.27   |
| force const | 0.00   | 0.00   | 0.00   | 0.00   | 0.01   | 0.02   |
|             |        |        |        |        |        |        |
| vibration # | 7      | 8      | 9      | 10     | 11     | 12     |
| -----       |        |        |        |        |        |        |
| frequencies | 171.21 | 205.36 | 215.46 | 225.38 | 247.97 | 261.93 |
| intensities | 0.88   | 1.52   | 1.83   | 0.85   | 0.69   | 1.47   |
| reduc. mass | 0.67   | 0.75   | 0.47   | 1.34   | 0.78   | 0.81   |
| force const | 0.01   | 0.02   | 0.01   | 0.04   | 0.03   | 0.03   |
|             |        |        |        |        |        |        |
| vibration # | 13     | 14     | 15     | 16     | 17     | 18     |
| -----       |        |        |        |        |        |        |
| frequencies | 271.97 | 283.03 | 289.71 | 295.04 | 332.32 | 336.14 |
| intensities | 7.95   | 0.77   | 0.76   | 0.47   | 0.29   | 5.07   |
| reduc. mass | 1.91   | 0.64   | 0.45   | 0.33   | 0.90   | 1.45   |
| force const | 0.08   | 0.03   | 0.02   | 0.02   | 0.06   | 0.10   |
|             |        |        |        |        |        |        |
| vibration # | 19     | 20     | 21     | 22     | 23     | 24     |
| -----       |        |        |        |        |        |        |



|             |        |        |        |        |        |        |
|-------------|--------|--------|--------|--------|--------|--------|
| frequencies | 359.36 | 408.93 | 421.51 | 445.07 | 481.57 | 490.19 |
| intensities | 2.41   | 0.48   | 1.40   | 3.21   | 11.44  | 0.08   |
| reduc. mass | 0.98   | 1.07   | 0.55   | 0.87   | 0.72   | 0.92   |
| force const | 0.07   | 0.10   | 0.06   | 0.10   | 0.10   | 0.13   |

vibration #      25    26    27    28    29    30

-----

|             |        |        |        |        |        |        |
|-------------|--------|--------|--------|--------|--------|--------|
| frequencies | 523.42 | 528.65 | 551.38 | 566.35 | 608.38 | 621.73 |
| intensities | 14.25  | 10.40  | 1.64   | 12.48  | 111.92 | 38.18  |
| reduc. mass | 0.99   | 2.38   | 0.78   | 0.91   | 0.61   | 0.70   |
| force const | 0.16   | 0.39   | 0.14   | 0.17   | 0.13   | 0.16   |

vibration #      31    32    33    34    35    36

-----

|             |        |        |        |        |        |        |
|-------------|--------|--------|--------|--------|--------|--------|
| frequencies | 661.22 | 670.00 | 699.09 | 706.47 | 713.64 | 746.98 |
| intensities | 86.85  | 15.02  | 55.64  | 10.98  | 0.76   | 7.56   |
| reduc. mass | 0.36   | 0.87   | 0.70   | 0.89   | 0.33   | 1.10   |
| force const | 0.09   | 0.23   | 0.20   | 0.26   | 0.10   | 0.36   |

vibration #      37    38    39    40    41    42

-----

|             |        |        |        |        |        |        |
|-------------|--------|--------|--------|--------|--------|--------|
| frequencies | 759.66 | 778.69 | 822.93 | 829.05 | 844.99 | 909.11 |
| intensities | 1.64   | 0.73   | 5.52   | 3.08   | 6.97   | 2.64   |
| reduc. mass | 0.81   | 0.47   | 1.26   | 2.69   | 0.80   | 0.57   |
| force const | 0.28   | 0.17   | 0.50   | 1.09   | 0.34   | 0.28   |

vibration #      43    44    45    46    47    48

-----

|             |        |        |        |        |         |         |
|-------------|--------|--------|--------|--------|---------|---------|
| frequencies | 937.20 | 949.77 | 964.74 | 991.67 | 1006.81 | 1028.12 |
|-------------|--------|--------|--------|--------|---------|---------|

|             |      |      |       |      |      |       |
|-------------|------|------|-------|------|------|-------|
| intensities | 4.23 | 2.07 | 12.28 | 9.79 | 4.99 | 33.25 |
| reduc. mass | 0.33 | 0.58 | 1.09  | 0.46 | 0.31 | 0.49  |
| force const | 0.17 | 0.31 | 0.60  | 0.27 | 0.19 | 0.30  |

vibration #      49    50    51    52    53    54

-----

|             |         |         |         |         |         |         |
|-------------|---------|---------|---------|---------|---------|---------|
| frequencies | 1038.29 | 1052.01 | 1058.27 | 1061.63 | 1071.47 | 1093.65 |
| intensities | 4.26    | 2.71    | 18.64   | 10.62   | 73.36   | 10.28   |
| reduc. mass | 0.24    | 0.27    | 0.43    | 0.30    | 0.50    | 0.42    |
| force const | 0.15    | 0.17    | 0.29    | 0.20    | 0.34    | 0.29    |

vibration #      55    56    57    58    59    60

-----

|             |         |         |         |         |         |         |
|-------------|---------|---------|---------|---------|---------|---------|
| frequencies | 1099.35 | 1122.50 | 1148.45 | 1168.80 | 1178.78 | 1199.99 |
| intensities | 14.34   | 8.88    | 114.99  | 7.45    | 15.18   | 63.25   |
| reduc. mass | 0.42    | 0.62    | 0.84    | 0.41    | 0.97    | 1.22    |
| force const | 0.30    | 0.46    | 0.66    | 0.33    | 0.79    | 1.04    |

vibration #      61    62    63    64    65    66

-----

|             |         |         |         |         |         |         |
|-------------|---------|---------|---------|---------|---------|---------|
| frequencies | 1228.37 | 1253.30 | 1257.51 | 1283.27 | 1301.73 | 1306.00 |
| intensities | 30.44   | 43.12   | 87.70   | 0.08    | 84.65   | 23.59   |
| reduc. mass | 0.66    | 0.30    | 1.08    | 0.36    | 1.04    | 0.72    |
| force const | 0.58    | 0.28    | 1.01    | 0.35    | 1.04    | 0.72    |

vibration #      67    68    69    70    71    72

-----

|             |         |         |         |         |         |         |
|-------------|---------|---------|---------|---------|---------|---------|
| frequencies | 1374.76 | 1388.46 | 1407.93 | 1434.21 | 1456.15 | 1470.85 |
| intensities | 12.36   | 108.12  | 327.92  | 86.77   | 59.68   | 104.18  |

|             |      |      |      |      |      |      |
|-------------|------|------|------|------|------|------|
| reduc. mass | 0.45 | 0.63 | 0.80 | 1.34 | 0.53 | 1.20 |
| force const | 0.50 | 0.72 | 0.93 | 1.62 | 0.67 | 1.53 |

vibration #      73    74    75    76    77    78

-----

|             |         |         |         |         |         |         |
|-------------|---------|---------|---------|---------|---------|---------|
| frequencies | 1505.16 | 1507.30 | 1515.95 | 1523.26 | 1524.74 | 1534.55 |
|-------------|---------|---------|---------|---------|---------|---------|

|             |       |      |      |       |        |      |
|-------------|-------|------|------|-------|--------|------|
| intensities | 39.39 | 3.73 | 8.45 | 45.37 | 189.23 | 7.66 |
|-------------|-------|------|------|-------|--------|------|

|             |      |      |      |      |      |      |
|-------------|------|------|------|------|------|------|
| reduc. mass | 0.65 | 0.67 | 0.99 | 1.46 | 0.95 | 0.61 |
|-------------|------|------|------|------|------|------|

|             |      |      |      |      |      |      |
|-------------|------|------|------|------|------|------|
| force const | 0.87 | 0.89 | 1.35 | 2.00 | 1.30 | 0.85 |
|-------------|------|------|------|------|------|------|

|    |   |         |         |          |          |          |          |
|----|---|---------|---------|----------|----------|----------|----------|
| C1 | X | 0.03454 | 0.00622 | -0.01479 | -0.04146 | -0.03995 | -0.06018 |
|----|---|---------|---------|----------|----------|----------|----------|

vibration #      79    80    81    82    83    84

-----

|             |         |         |         |         |         |         |
|-------------|---------|---------|---------|---------|---------|---------|
| frequencies | 1561.55 | 1566.64 | 1590.35 | 1630.65 | 1634.23 | 1641.59 |
|-------------|---------|---------|---------|---------|---------|---------|

|             |       |       |       |      |       |       |
|-------------|-------|-------|-------|------|-------|-------|
| intensities | 39.07 | 22.94 | 52.32 | 8.19 | 29.39 | 35.66 |
|-------------|-------|-------|-------|------|-------|-------|

|             |      |      |      |      |      |      |
|-------------|------|------|------|------|------|------|
| reduc. mass | 0.46 | 0.44 | 0.78 | 0.74 | 0.30 | 0.18 |
|-------------|------|------|------|------|------|------|

|             |      |      |      |      |      |      |
|-------------|------|------|------|------|------|------|
| force const | 0.66 | 0.64 | 1.16 | 1.16 | 0.47 | 0.29 |
|-------------|------|------|------|------|------|------|

vibration #      85    86    87    88    89    90

-----

|             |         |         |         |         |         |         |
|-------------|---------|---------|---------|---------|---------|---------|
| frequencies | 1645.51 | 1659.94 | 1661.64 | 1664.84 | 1665.54 | 1667.97 |
|-------------|---------|---------|---------|---------|---------|---------|

|             |        |       |       |      |      |       |
|-------------|--------|-------|-------|------|------|-------|
| intensities | 102.63 | 26.71 | 84.05 | 9.90 | 7.21 | 10.57 |
|-------------|--------|-------|-------|------|------|-------|

|             |      |      |      |      |      |      |
|-------------|------|------|------|------|------|------|
| reduc. mass | 0.49 | 0.31 | 0.26 | 0.22 | 0.21 | 0.14 |
|-------------|------|------|------|------|------|------|

|             |      |      |      |      |      |      |
|-------------|------|------|------|------|------|------|
| force const | 0.78 | 0.51 | 0.42 | 0.36 | 0.35 | 0.23 |
|-------------|------|------|------|------|------|------|

vibration #      91    92    93    94    95    96

-----

|             |         |         |         |         |         |         |
|-------------|---------|---------|---------|---------|---------|---------|
| frequencies | 1668.05 | 1672.40 | 1680.08 | 1686.29 | 1708.69 | 1803.69 |
|-------------|---------|---------|---------|---------|---------|---------|

|             |      |      |       |       |       |        |
|-------------|------|------|-------|-------|-------|--------|
| intensities | 7.63 | 1.54 | 31.27 | 78.78 | 66.43 | 928.22 |
|-------------|------|------|-------|-------|-------|--------|

|             |      |      |      |      |      |      |
|-------------|------|------|------|------|------|------|
| reduc. mass | 0.18 | 0.21 | 0.55 | 0.57 | 1.36 | 1.55 |
| force const | 0.30 | 0.34 | 0.91 | 0.96 | 2.34 | 2.96 |

vibration #      97    98    99    100    101    102

-----

|             |         |         |         |         |         |         |
|-------------|---------|---------|---------|---------|---------|---------|
| frequencies | 1846.05 | 1892.80 | 3022.06 | 3025.10 | 3036.48 | 3061.14 |
|-------------|---------|---------|---------|---------|---------|---------|

|             |        |       |        |        |         |        |
|-------------|--------|-------|--------|--------|---------|--------|
| intensities | 383.23 | 26.49 | 466.98 | 300.82 | 1009.64 | 374.22 |
|-------------|--------|-------|--------|--------|---------|--------|

|             |      |      |      |      |      |      |
|-------------|------|------|------|------|------|------|
| reduc. mass | 1.40 | 0.90 | 0.26 | 0.21 | 0.23 | 0.36 |
|-------------|------|------|------|------|------|------|

|             |      |      |      |      |      |      |
|-------------|------|------|------|------|------|------|
| force const | 2.81 | 1.90 | 1.42 | 1.14 | 1.26 | 1.97 |
|-------------|------|------|------|------|------|------|

vibration #      103    104    105    106    107    108

-----

|             |         |         |         |         |         |         |
|-------------|---------|---------|---------|---------|---------|---------|
| frequencies | 3071.90 | 3082.51 | 3085.81 | 3109.07 | 3113.72 | 3125.39 |
|-------------|---------|---------|---------|---------|---------|---------|

|             |        |        |        |       |        |        |
|-------------|--------|--------|--------|-------|--------|--------|
| intensities | 269.71 | 432.80 | 150.40 | 37.51 | 494.07 | 135.42 |
|-------------|--------|--------|--------|-------|--------|--------|

|             |      |      |      |      |      |      |
|-------------|------|------|------|------|------|------|
| reduc. mass | 0.30 | 0.46 | 0.46 | 0.52 | 0.18 | 0.26 |
|-------------|------|------|------|------|------|------|

|             |      |      |      |      |      |      |
|-------------|------|------|------|------|------|------|
| force const | 1.68 | 2.57 | 2.56 | 2.93 | 1.00 | 1.47 |
|-------------|------|------|------|------|------|------|

vibration #      109    110    111    112    113    114

-----

|             |         |         |         |         |         |         |
|-------------|---------|---------|---------|---------|---------|---------|
| frequencies | 3126.20 | 3136.60 | 3137.16 | 3140.32 | 3146.91 | 3148.76 |
|-------------|---------|---------|---------|---------|---------|---------|

|             |        |        |        |       |        |       |
|-------------|--------|--------|--------|-------|--------|-------|
| intensities | 873.39 | 460.87 | 401.66 | 62.95 | 409.00 | 24.42 |
|-------------|--------|--------|--------|-------|--------|-------|

|             |      |      |      |      |      |      |
|-------------|------|------|------|------|------|------|
| reduc. mass | 0.23 | 0.38 | 0.27 | 0.18 | 0.23 | 0.26 |
|-------------|------|------|------|------|------|------|

|             |      |      |      |      |      |      |
|-------------|------|------|------|------|------|------|
| force const | 1.35 | 2.19 | 1.56 | 1.03 | 1.31 | 1.53 |
|-------------|------|------|------|------|------|------|

vibration #      115    116    117    118    119    120

-----

|             |         |         |         |         |         |         |
|-------------|---------|---------|---------|---------|---------|---------|
| frequencies | 3151.65 | 3156.76 | 3193.08 | 3203.43 | 3822.95 | 3831.29 |
|-------------|---------|---------|---------|---------|---------|---------|

|             |        |        |        |        |        |       |
|-------------|--------|--------|--------|--------|--------|-------|
| intensities | 471.77 | 586.86 | 135.86 | 276.07 | 157.83 | 55.09 |
|-------------|--------|--------|--------|--------|--------|-------|

|             |      |      |      |      |      |      |
|-------------|------|------|------|------|------|------|
| reduc. mass | 0.21 | 0.39 | 0.39 | 0.22 | 0.70 | 0.70 |
|-------------|------|------|------|------|------|------|

force const    1.22   2.31   2.35   1.31   6.05   6.08

Number of imaginary frequencies: 0

#### Conformation 4

Boltzmann Population = 18.9% (relative energy = 0.58 kcal/mol)

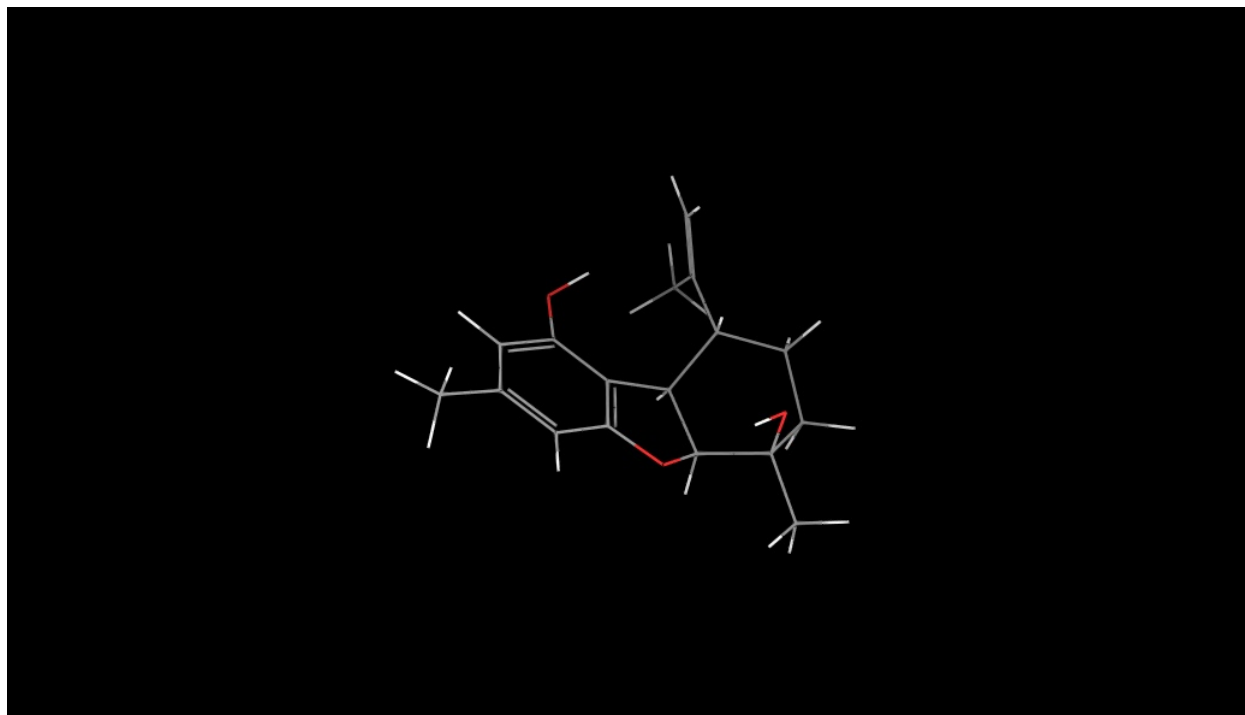

Geometries and Energy Method: M06-2X-D3/6-31G(d,p)

NMR Method: mPW1PW91/6-311+G(2d,p)

Thermodynamic properties for P = 1.00 atm, calculated at 1 temperatures

T = 298.15 K, P = 1.00 atm

Total internal energy,  $U_{\text{tot}}(\text{SCFE} + \text{ZPE} + U)$ : -885.980277 hartrees

Total enthalpy,  $H_{\text{tot}}(U_{\text{tot}} + pV)$ : -885.979333 hartrees

Total Gibbs free energy,  $G_{\text{tot}}(H_{\text{tot}} - T^*S)$ : -886.041789 hartrees

Optimized Geometry:

| Center<br>Number | Atomic<br>Number | Atomic<br>Type | Coordinates (Angstroms) |          |          |
|------------------|------------------|----------------|-------------------------|----------|----------|
|                  |                  |                | X                       | Y        | Z        |
| 1                | 6                | 0              | -3.486500               | 2.159500 | 1.043400 |
| 2                | 6                | 0              | -3.566800               | 1.187800 | 2.228800 |
| 3                | 6                | 0              | -4.931200               | 1.190200 | 2.971900 |

|    |   |   |            |           |           |
|----|---|---|------------|-----------|-----------|
| 4  | 6 | 0 | -5.690100  | 2.531000  | 2.831100  |
| 5  | 6 | 0 | -5.760600  | 3.047000  | 1.362000  |
| 6  | 6 | 0 | -4.840200  | 2.331900  | 0.365600  |
| 7  | 6 | 0 | -4.739900  | 3.129300  | -0.932600 |
| 8  | 6 | 0 | -4.716200  | 0.801300  | 4.421300  |
| 9  | 6 | 0 | -7.168600  | 2.459400  | 3.167500  |
| 10 | 6 | 0 | -7.903700  | 2.670900  | 2.003000  |
| 11 | 6 | 0 | -7.874400  | 2.255400  | 4.351000  |
| 12 | 6 | 0 | -9.272500  | 2.299500  | 4.334700  |
| 13 | 6 | 0 | -9.979400  | 2.518600  | 3.155200  |
| 14 | 6 | 0 | -9.284400  | 2.704500  | 1.954800  |
| 15 | 8 | 0 | -7.264900  | 2.054700  | 5.556400  |
| 16 | 8 | 0 | -7.114100  | 2.875200  | 0.905300  |
| 17 | 8 | 0 | -5.346000  | 1.034400  | 0.099400  |
| 18 | 6 | 0 | -11.487000 | 2.525600  | 3.155600  |
| 19 | 6 | 0 | -4.024600  | 1.794600  | 5.326000  |
| 20 | 6 | 0 | -5.125300  | -0.387100 | 4.879100  |
| 21 | 1 | 0 | -3.149700  | 3.150500  | 1.374400  |
| 22 | 1 | 0 | -2.754000  | 1.803900  | 0.312000  |
| 23 | 1 | 0 | -2.751300  | 1.410100  | 2.924100  |
| 24 | 1 | 0 | -3.400900  | 0.168000  | 1.874400  |
| 25 | 1 | 0 | -5.557200  | 0.428200  | 2.500900  |
| 26 | 1 | 0 | -5.185400  | 3.290300  | 3.439900  |
| 27 | 1 | 0 | -5.543000  | 4.122700  | 1.343300  |
| 28 | 1 | 0 | -4.154200  | 2.563700  | -1.661100 |
| 29 | 1 | 0 | -5.737700  | 3.306800  | -1.345500 |
| 30 | 1 | 0 | -4.259600  | 4.098500  | -0.767900 |
| 31 | 1 | 0 | -9.791800  | 2.147700  | 5.275300  |
| 32 | 1 | 0 | -9.800600  | 2.888500  | 1.019000  |
| 33 | 1 | 0 | -6.556300  | 1.405100  | 5.434600  |
| 34 | 1 | 0 | -6.288900  | 1.148200  | -0.086300 |
| 35 | 1 | 0 | -11.882400 | 2.693700  | 4.159100  |
| 36 | 1 | 0 | -11.877600 | 3.305400  | 2.496800  |
| 37 | 1 | 0 | -11.878400 | 1.568300  | 2.797500  |
| 38 | 1 | 0 | -3.139400  | 2.228500  | 4.851700  |
| 39 | 1 | 0 | -4.696300  | 2.624100  | 5.574300  |
| 40 | 1 | 0 | -3.716200  | 1.322900  | 6.261100  |
| 41 | 1 | 0 | -4.942800  | -0.696000 | 5.904700  |
| 42 | 1 | 0 | -5.644400  | -1.089900 | 4.234300  |

-----

SCF GIAO Magnetic shielding tensor (ppm):

|              |          |             |          |              |          |
|--------------|----------|-------------|----------|--------------|----------|
| 1            | C        | Isotropic = | 154.0129 | Anisotropy = | 24.5160  |
| XX=          | 153.6165 | YX=         | 7.6458   | ZX=          | -8.5415  |
| XY=          | 4.3312   | YY=         | 168.1433 | ZY=          | -0.4775  |
| XZ=          | -2.0742  | YZ=         | 1.4272   | ZZ=          | 140.2791 |
| Eigenvalues: | 138.2161 | 153.4658    | 170.3569 |              |          |
| 2            | C        | Isotropic = | 161.0655 | Anisotropy = | 24.4491  |
| XX=          | 174.4049 | YX=         | -7.6684  | ZX=          | 0.8994   |
| XY=          | -4.4659  | YY=         | 163.6892 | ZY=          | 8.1661   |
| XZ=          | -0.0312  | YZ=         | 6.2509   | ZZ=          | 145.1025 |

|              |             |          |              |          |          |
|--------------|-------------|----------|--------------|----------|----------|
| Eigenvalues: | 142.4502    | 163.3814 | 177.3649     |          |          |
| 3 C          | Isotropic = | 137.6528 | Anisotropy = | 14.2686  |          |
| XX=          | 138.3095    | YX=      | -5.8256      | ZX=      | 2.5872   |
| XY=          | 4.2025      | YY=      | 147.0628     | ZY=      | 0.5512   |
| XZ=          | 5.2990      | YZ=      | -1.2420      | ZZ=      | 127.5861 |
| Eigenvalues: | 126.2920    | 139.5012 | 147.1652     |          |          |
| 4 C          | Isotropic = | 141.3030 | Anisotropy = | 22.1178  |          |
| XX=          | 154.4038    | YX=      | 0.8734       | ZX=      | -0.6497  |
| XY=          | -6.8999     | YY=      | 148.2513     | ZY=      | 3.4408   |
| XZ=          | 0.1542      | YZ=      | 13.4371      | ZZ=      | 121.2538 |
| Eigenvalues: | 118.8230    | 149.0377 | 156.0482     |          |          |
| 5 C          | Isotropic = | 98.1647  | Anisotropy = | 59.9411  |          |
| XX=          | 124.1154    | YX=      | 15.8117      | ZX=      | -12.8131 |
| XY=          | 14.1046     | YY=      | 101.2068     | ZY=      | -14.3432 |
| XZ=          | -21.7672    | YZ=      | -11.9013     | ZZ=      | 69.1718  |
| Eigenvalues: | 62.0945     | 94.2741  | 138.1254     |          |          |
| 6 C          | Isotropic = | 116.6879 | Anisotropy = | 49.4367  |          |
| XX=          | 96.8049     | YX=      | -4.1785      | ZX=      | -13.4275 |
| XY=          | -1.4785     | YY=      | 105.9467     | ZY=      | 0.0181   |
| XZ=          | -7.8391     | YZ=      | 4.6535       | ZZ=      | 147.3121 |
| Eigenvalues: | 94.1975     | 106.2204 | 149.6457     |          |          |
| 7 C          | Isotropic = | 158.3272 | Anisotropy = | 45.8746  |          |
| XX=          | 141.6829    | YX=      | -15.9774     | ZX=      | -3.6543  |
| XY=          | -17.8023    | YY=      | 178.1349     | ZY=      | 13.7355  |
| XZ=          | 0.7157      | YZ=      | 10.4782      | ZZ=      | 155.1637 |
| Eigenvalues: | 134.5385    | 151.5327 | 188.9103     |          |          |
| 8 C          | Isotropic = | 24.9355  | Anisotropy = | 197.4257 |          |
| XX=          | 143.4377    | YX=      | 18.3394      | ZX=      | 39.6725  |
| XY=          | 16.1568     | YY=      | -53.1714     | ZY=      | 62.7021  |
| XZ=          | 35.1741     | YZ=      | 59.7692      | ZZ=      | -15.4599 |
| Eigenvalues: | -98.6928    | 16.9466  | 156.5526     |          |          |
| 9 C          | Isotropic = | 66.9761  | Anisotropy = | 107.5572 |          |
| XX=          | 20.0264     | YX=      | 6.1237       | ZX=      | 21.2933  |
| XY=          | -17.7214    | YY=      | 51.6306      | ZY=      | 19.7909  |
| XZ=          | 24.0644     | YZ=      | 24.3946      | ZZ=      | 129.2711 |
| Eigenvalues: | 12.6825     | 49.5648  | 138.6809     |          |          |
| 10 C         | Isotropic = | 20.7075  | Anisotropy = | 104.0645 |          |
| XX=          | -15.7002    | YX=      | 40.1309      | ZX=      | 12.1864  |
| XY=          | 53.2829     | YY=      | -9.1882      | ZY=      | 4.7483   |
| XZ=          | 13.3759     | YZ=      | 5.8955       | ZZ=      | 87.0108  |
| Eigenvalues: | -59.4901    | 31.5287  | 90.0838      |          |          |
| 11 C         | Isotropic = | 26.7610  | Anisotropy = | 131.4182 |          |
| XX=          | 18.2765     | YX=      | -18.7323     | ZX=      | 14.1850  |
| XY=          | -8.6873     | YY=      | -47.0372     | ZY=      | 22.9494  |
| XZ=          | 12.0565     | YZ=      | 28.2976      | ZZ=      | 109.0437 |
| Eigenvalues: | -54.5159    | 20.4258  | 114.3732     |          |          |
| 12 C         | Isotropic = | 69.1229  | Anisotropy = | 117.5304 |          |
| XX=          | 31.5022     | YX=      | 37.5389      | ZX=      | 9.5110   |
| XY=          | 50.3821     | YY=      | 33.2511      | ZY=      | 10.9143  |
| XZ=          | 23.5495     | YZ=      | 7.8200       | ZZ=      | 142.6154 |
| Eigenvalues: | -11.7753    | 71.6676  | 147.4765     |          |          |
| 13 C         | Isotropic = | 41.1465  | Anisotropy = | 194.1429 |          |



|              |          |             |          |                             |          |          |
|--------------|----------|-------------|----------|-----------------------------|----------|----------|
| XX=          | -44.5677 | YX=         | -12.0887 | ZX=                         | 33.1587  |          |
| XY=          | -17.7583 | YY=         | 6.3516   | ZY=                         | 30.2126  |          |
| XZ=          | 31.4013  | YZ=         | 25.8480  | <td>161.6557</td> <td></td> | 161.6557 |          |
| Eigenvalues: | -55.6086 |             | 8.4731   |                             | 170.5751 |          |
| 14           | C        | Isotropic = | 80.3375  | Anisotropy =                |          | 122.8206 |
| XX=          | 74.7770  | YX=         | -2.9697  | ZX=                         | 14.6528  |          |
| XY=          | -14.7739 | YY=         | 10.4334  | ZY=                         | 25.0686  |          |
| XZ=          | 20.9385  | YZ=         | 19.6077  | ZZ=                         | 155.8021 |          |
| Eigenvalues: | 5.1585   |             | 73.6360  |                             | 162.2179 |          |
| 15           | O        | Isotropic = | 215.9340 | Anisotropy =                |          | 61.8567  |
| XX=          | 167.7987 | YX=         | 1.4117   | ZX=                         | -1.3776  |          |
| XY=          | 4.2032   | YY=         | 226.8360 | ZY=                         | 13.8663  |          |
| XZ=          | 38.1483  | YZ=         | -9.8321  | ZZ=                         | 253.1671 |          |
| Eigenvalues: | 163.9203 |             | 226.7098 |                             | 257.1718 |          |
| 16           | O        | Isotropic = | 193.2748 | Anisotropy =                |          | 110.4479 |
| XX=          | 206.7795 | YX=         | -76.4093 | ZX=                         | 15.0818  |          |
| XY=          | -47.4174 | YY=         | 195.1468 | ZY=                         | 14.3390  |          |
| XZ=          | 15.1413  | YZ=         | -35.4601 | ZZ=                         | 177.8980 |          |
| Eigenvalues: | 138.6243 |             | 174.2933 |                             | 266.9067 |          |
| 17           | O        | Isotropic = | 270.0788 | Anisotropy =                |          | 30.3152  |
| XX=          | 274.4001 | YX=         | 2.4890   | ZX=                         | -20.0248 |          |
| XY=          | 3.0906   | YY=         | 271.4108 | ZY=                         | 23.9343  |          |
| XZ=          | -18.8750 | YZ=         | -4.8116  | ZZ=                         | 264.4255 |          |
| Eigenvalues: | 245.9250 |             | 274.0225 |                             | 290.2889 |          |
| 18           | C        | Isotropic = | 164.2794 | Anisotropy =                |          | 40.7974  |
| XX=          | 188.3006 | YX=         | 6.9028   | ZX=                         | -3.0547  |          |
| XY=          | 9.0874   | YY=         | 159.1560 | ZY=                         | -2.1727  |          |
| XZ=          | -10.1289 | YZ=         | -4.4276  | ZZ=                         | 145.3815 |          |
| Eigenvalues: | 144.0730 |             | 157.2874 |                             | 191.4776 |          |
| 19           | C        | Isotropic = | 167.7464 | Anisotropy =                |          | 25.9483  |
| XX=          | 159.1729 | YX=         | 2.0937   | ZX=                         | -4.0786  |          |
| XY=          | 5.2134   | YY=         | 168.0081 | ZY=                         | -13.3738 |          |
| XZ=          | -5.2889  | YZ=         | -8.4957  | ZZ=                         | 176.0582 |          |
| Eigenvalues: | 157.7763 |             | 160.4176 |                             | 185.0453 |          |
| 20           | C        | Isotropic = | 66.7459  | Anisotropy =                |          | 112.4239 |
| XX=          | 137.9044 | YX=         | 7.1251   | ZX=                         | 6.5576   |          |
| XY=          | 7.0724   | YY=         | 2.1181   | ZY=                         | 60.1178  |          |
| XZ=          | 15.1188  | YZ=         | 58.9951  | ZZ=                         | 60.2152  |          |
| Eigenvalues: | -35.0968 |             | 93.6393  |                             | 141.6952 |          |
| 21           | H        | Isotropic = | 30.5409  | Anisotropy =                |          | 7.8793   |
| XX=          | 29.1505  | YX=         | 0.0132   | ZX=                         | -4.3215  |          |
| XY=          | 0.3568   | YY=         | 29.8873  | ZY=                         | -0.0597  |          |
| XZ=          | -4.8457  | YZ=         | -0.7317  | ZZ=                         | 32.5848  |          |
| Eigenvalues: | 25.9716  |             | 29.8573  |                             | 35.7938  |          |
| 22           | H        | Isotropic = | 29.9237  | Anisotropy =                |          | 9.0162   |
| XX=          | 34.9594  | YX=         | -2.4880  | ZX=                         | 1.2169   |          |
| XY=          | -2.1119  | YY=         | 29.8998  | ZY=                         | 0.3824   |          |
| XZ=          | 1.2123   | YZ=         | 0.5304   | ZZ=                         | 24.9119  |          |
| Eigenvalues: | 24.6567  |             | 29.1798  |                             | 35.9345  |          |
| 23           | H        | Isotropic = | 30.3606  | Anisotropy =                |          | 7.9777   |
| XX=          | 31.7221  | YX=         | 1.4555   | ZX=                         | -2.3814  |          |
| XY=          | 1.7418   | YY=         | 34.1086  | ZY=                         | -2.3426  |          |

|              |             |         |              |         |         |  |
|--------------|-------------|---------|--------------|---------|---------|--|
| XZ=          | -0.9269     | YZ=     | -2.3216      | ZZ=     | 25.2510 |  |
| Eigenvalues: | 24.4578     |         | 30.9449      |         | 35.6791 |  |
| 24 H         | Isotropic = | 29.9378 | Anisotropy = | 9.0107  |         |  |
| XX=          | 30.2554     | YX=     | -0.3407      | ZX=     | 4.6862  |  |
| XY=          | 0.1865      | YY=     | 28.0663      | ZY=     | 2.8146  |  |
| XZ=          | 4.5732      | YZ=     | 1.9597       | ZZ=     | 31.4918 |  |
| Eigenvalues: | 25.1782     |         | 28.6903      |         | 35.9449 |  |
| 25 H         | Isotropic = | 28.4447 | Anisotropy = | 3.0104  |         |  |
| XX=          | 27.1151     | YX=     | -1.5415      | ZX=     | -1.2430 |  |
| XY=          | -1.3558     | YY=     | 29.4201      | ZY=     | -0.3967 |  |
| XZ=          | 0.2005      | YZ=     | 1.5348       | ZZ=     | 28.7989 |  |
| Eigenvalues: | 26.3945     |         | 28.4879      |         | 30.4516 |  |
| 26 H         | Isotropic = | 28.2007 | Anisotropy = | 5.6500  |         |  |
| XX=          | 25.5327     | YX=     | 0.7016       | ZX=     | 0.9446  |  |
| XY=          | -0.7528     | YY=     | 29.9154      | ZY=     | -1.7636 |  |
| XZ=          | -0.8744     | YZ=     | -3.0413      | ZZ=     | 29.1542 |  |
| Eigenvalues: | 25.5323     |         | 27.1025      |         | 31.9674 |  |
| 27 H         | Isotropic = | 27.3632 | Anisotropy = | 4.6638  |         |  |
| XX=          | 25.4812     | YX=     | -0.0029      | ZX=     | -1.4521 |  |
| XY=          | -0.5928     | YY=     | 27.5942      | ZY=     | 1.0031  |  |
| XZ=          | -1.8353     | YZ=     | 2.0397       | ZZ=     | 29.0142 |  |
| Eigenvalues: | 24.8010     |         | 26.8163      |         | 30.4724 |  |
| 28 H         | Isotropic = | 30.6188 | Anisotropy = | 9.2643  |         |  |
| XX=          | 32.0928     | YX=     | -3.5915      | ZX=     | 2.1446  |  |
| XY=          | -4.7758     | YY=     | 31.9525      | ZY=     | -1.6941 |  |
| XZ=          | 2.0526      | YZ=     | -0.5763      | ZZ=     | 27.8111 |  |
| Eigenvalues: | 26.8206     |         | 28.2407      |         | 36.7950 |  |
| 29 H         | Isotropic = | 30.0553 | Anisotropy = | 8.2588  |         |  |
| XX=          | 29.8766     | YX=     | 0.3545       | ZX=     | -0.4212 |  |
| XY=          | 1.7570      | YY=     | 35.3040      | ZY=     | 0.3785  |  |
| XZ=          | -0.0360     | YZ=     | 1.3136       | ZZ=     | 24.9854 |  |
| Eigenvalues: | 24.8963     |         | 29.7085      |         | 35.5612 |  |
| 30 H         | Isotropic = | 30.9007 | Anisotropy = | 10.0191 |         |  |
| XX=          | 28.4150     | YX=     | -1.8888      | ZX=     | -3.0064 |  |
| XY=          | -2.1163     | YY=     | 30.7242      | ZY=     | 4.1462  |  |
| XZ=          | -3.2660     | YZ=     | 3.1771       | ZZ=     | 33.5627 |  |
| Eigenvalues: | 26.8964     |         | 28.2255      |         | 37.5800 |  |
| 31 H         | Isotropic = | 25.1800 | Anisotropy = | 7.1413  |         |  |
| XX=          | 27.6621     | YX=     | 2.5368       | ZX=     | -0.9992 |  |
| XY=          | 2.6408      | YY=     | 26.1132      | ZY=     | -1.0978 |  |
| XZ=          | -0.9277     | YZ=     | -1.9624      | ZZ=     | 21.7648 |  |
| Eigenvalues: | 21.2766     |         | 24.3226      |         | 29.9409 |  |
| 32 H         | Isotropic = | 25.2741 | Anisotropy = | 7.5013  |         |  |
| XX=          | 30.1586     | YX=     | -0.2441      | ZX=     | -1.0136 |  |
| XY=          | 0.2062      | YY=     | 24.5070      | ZY=     | -0.4007 |  |
| XZ=          | -1.0474     | YZ=     | -0.0529      | ZZ=     | 21.1568 |  |
| Eigenvalues: | 21.0255     |         | 24.5219      |         | 30.2750 |  |
| 33 H         | Isotropic = | 26.3719 | Anisotropy = | 22.8080 |         |  |
| XX=          | 35.1582     | YX=     | 3.7616       | ZX=     | 8.0452  |  |
| XY=          | 5.8386      | YY=     | 24.7943      | ZY=     | 3.2391  |  |
| XZ=          | 10.2336     | YZ=     | 5.3666       | ZZ=     | 19.1631 |  |
| Eigenvalues: | 14.5848     |         | 22.9536      |         | 41.5772 |  |

|              |         |             |         |              |         |
|--------------|---------|-------------|---------|--------------|---------|
| 34           | H       | Isotropic = | 30.0613 | Anisotropy = | 15.4918 |
| XX=          | 35.2752 | YX=         | 7.0459  | ZX=          | -1.5569 |
| XY=          | 6.8647  | YY=         | 26.0271 | ZY=          | -4.8978 |
| XZ=          | -2.2481 | YZ=         | -4.4798 | ZZ=          | 28.8817 |
| Eigenvalues: | 20.8467 |             | 28.9481 |              | 40.3892 |
| 35           | H       | Isotropic = | 29.8093 | Anisotropy = | 8.0015  |
| XX=          | 34.1873 | YX=         | -3.0266 | ZX=          | 1.1685  |
| XY=          | -0.6161 | YY=         | 29.9702 | ZY=          | -1.8609 |
| XZ=          | 1.0384  | YZ=         | -1.5931 | ZZ=          | 25.2703 |
| Eigenvalues: | 24.6776 |             | 29.6066 |              | 35.1436 |
| 36           | H       | Isotropic = | 29.5637 | Anisotropy = | 8.1789  |
| XX=          | 31.1441 | YX=         | 3.6563  | ZX=          | 0.4934  |
| XY=          | 1.7603  | YY=         | 32.1574 | ZY=          | 2.3125  |
| XZ=          | 1.0752  | YZ=         | 2.6345  | ZZ=          | 25.3896 |
| Eigenvalues: | 24.5803 |             | 29.0945 |              | 35.0163 |
| 37           | H       | Isotropic = | 29.3524 | Anisotropy = | 8.7259  |
| XX=          | 29.7307 | YX=         | 1.1374  | ZX=          | -3.3317 |
| XY=          | 0.5734  | YY=         | 26.5575 | ZY=          | -1.6090 |
| XZ=          | -4.2381 | YZ=         | -2.2999 | ZZ=          | 31.7690 |
| Eigenvalues: | 25.8163 |             | 27.0712 |              | 35.1697 |
| 38           | H       | Isotropic = | 29.8377 | Anisotropy = | 6.4469  |
| XX=          | 31.6617 | YX=         | -1.0229 | ZX=          | -3.6027 |
| XY=          | -0.1036 | YY=         | 29.9213 | ZY=          | -3.1062 |
| XZ=          | -3.8118 | YZ=         | -1.8412 | ZZ=          | 27.9301 |
| Eigenvalues: | 24.5562 |             | 30.8213 |              | 34.1356 |
| 39           | H       | Isotropic = | 29.2296 | Anisotropy = | 5.3435  |
| XX=          | 29.8395 | YX=         | 0.9998  | ZX=          | 3.3444  |
| XY=          | 1.2102  | YY=         | 28.3277 | ZY=          | -1.8916 |
| XZ=          | 2.7961  | YZ=         | -1.5277 | ZZ=          | 29.5217 |
| Eigenvalues: | 25.2833 |             | 29.6136 |              | 32.7920 |
| 40           | H       | Isotropic = | 29.9156 | Anisotropy = | 8.9442  |
| XX=          | 26.5509 | YX=         | 1.2727  | ZX=          | -0.9323 |
| XY=          | 0.6394  | YY=         | 35.7004 | ZY=          | 0.0010  |
| XZ=          | -0.5865 | YZ=         | -1.4774 | ZZ=          | 27.4955 |
| Eigenvalues: | 26.1033 |             | 27.7650 |              | 35.8784 |
| 41           | H       | Isotropic = | 26.5979 | Anisotropy = | 6.9035  |
| XX=          | 25.4859 | YX=         | -0.7476 | ZX=          | -0.4723 |
| XY=          | -0.0064 | YY=         | 26.8699 | ZY=          | 2.1646  |
| XZ=          | -0.7962 | YZ=         | 5.7255  | ZZ=          | 27.4379 |
| Eigenvalues: | 23.1877 |             | 25.4058 |              | 31.2003 |
| 42           | H       | Isotropic = | 26.4619 | Anisotropy = | 7.2612  |
| XX=          | 25.7137 | YX=         | -0.0528 | ZX=          | -1.1714 |
| XY=          | -1.1258 | YY=         | 25.4787 | ZY=          | 5.1473  |
| XZ=          | 0.0767  | YZ=         | 3.1294  | ZZ=          | 28.1934 |
| Eigenvalues: | 22.4731 |             | 25.6099 |              | 31.3028 |

Number of frequencies: 120

harmonic frequencies in  $\text{cm}^{-1}$ , reduced masses in amu,

force constants in mDyne/A, and

normal modes in cartesian coordinates: 120

IR intensities in  $\text{km/mol}$

vibration # 1 2 3 4 5 6

-----  
frequencies 56.49 76.31 87.84 95.64 119.05 143.20

intensities 0.59 1.00 1.54 0.44 1.79 2.73

reduc. mass 1.60 0.83 0.26 1.02 2.39 1.65

force const 0.00 0.00 0.00 0.01 0.02 0.02

vibration # 7 8 9 10 11 12

-----  
frequencies 180.17 204.71 219.27 229.16 247.12 268.64

intensities 2.28 0.42 1.98 0.57 2.84 2.71

reduc. mass 0.67 1.08 1.32 1.22 0.76 0.46

force const 0.01 0.03 0.04 0.04 0.03 0.02

vibration # 13 14 15 16 17 18

-----  
frequencies 271.53 284.83 296.46 302.34 324.59 345.95

intensities 3.72 0.45 0.82 1.57 2.14 0.53

reduc. mass 0.63 0.41 0.23 0.46 1.75 0.84

force const 0.03 0.02 0.01 0.02 0.11 0.06

vibration # 19 20 21 22 23 24

-----

|             |        |        |        |        |        |        |
|-------------|--------|--------|--------|--------|--------|--------|
| frequencies | 369.34 | 405.74 | 417.32 | 446.61 | 469.30 | 489.66 |
| intensities | 3.83   | 8.63   | 1.29   | 2.69   | 101.58 | 4.18   |
| reduc. mass | 0.72   | 1.22   | 0.70   | 0.90   | 0.56   | 0.73   |
| force const | 0.06   | 0.12   | 0.07   | 0.11   | 0.07   | 0.10   |
| vibration # | 25     | 26     | 27     | 28     | 29     | 30     |

-----

|             |        |        |        |        |        |        |
|-------------|--------|--------|--------|--------|--------|--------|
| frequencies | 509.53 | 525.40 | 535.08 | 553.56 | 576.01 | 613.29 |
| intensities | 11.70  | 3.59   | 0.57   | 15.50  | 14.72  | 34.57  |
| reduc. mass | 0.54   | 1.43   | 0.81   | 0.63   | 0.58   | 0.81   |
| force const | 0.08   | 0.23   | 0.14   | 0.11   | 0.11   | 0.18   |
| vibration # | 31     | 32     | 33     | 34     | 35     | 36     |

-----

|             |        |        |        |        |        |        |
|-------------|--------|--------|--------|--------|--------|--------|
| frequencies | 625.07 | 667.59 | 693.44 | 706.78 | 712.75 | 734.21 |
| intensities | 127.21 | 7.97   | 13.59  | 11.21  | 3.85   | 1.75   |
| reduc. mass | 0.72   | 0.95   | 0.82   | 1.51   | 0.42   | 1.84   |
| force const | 0.17   | 0.25   | 0.23   | 0.44   | 0.13   | 0.58   |
| vibration # | 37     | 38     | 39     | 40     | 41     | 42     |

-----

|             |        |        |        |        |        |        |
|-------------|--------|--------|--------|--------|--------|--------|
| frequencies | 756.88 | 776.17 | 790.50 | 818.44 | 835.79 | 911.63 |
| intensities | 3.58   | 6.10   | 6.63   | 12.84  | 15.27  | 9.39   |
| reduc. mass | 0.87   | 0.59   | 1.72   | 0.89   | 0.82   | 0.56   |
| force const | 0.29   | 0.21   | 0.63   | 0.35   | 0.34   | 0.27   |
| vibration # | 43     | 44     | 45     | 46     | 47     | 48     |

-----

|             |        |        |        |        |         |         |
|-------------|--------|--------|--------|--------|---------|---------|
| frequencies | 917.25 | 948.50 | 953.47 | 999.05 | 1006.27 | 1024.13 |
| intensities | 2.88   | 6.48   | 5.81   | 8.55   | 7.71    | 20.10   |
| reduc. mass | 0.49   | 0.52   | 1.49   | 0.49   | 0.20    | 0.21    |
| force const | 0.24   | 0.28   | 0.80   | 0.29   | 0.12    | 0.13    |

vibration #      49    50    51    52    53    54

-----

|             |         |         |         |         |         |         |
|-------------|---------|---------|---------|---------|---------|---------|
| frequencies | 1029.48 | 1029.53 | 1051.78 | 1062.23 | 1072.76 | 1093.02 |
| intensities | 12.30   | 9.57    | 7.20    | 1.70    | 7.82    | 103.41  |
| reduc. mass | 0.20    | 0.26    | 0.47    | 0.29    | 0.37    | 0.83    |
| force const | 0.12    | 0.16    | 0.30    | 0.19    | 0.25    | 0.59    |

vibration #      55    56    57    58    59    60

-----

|             |         |         |         |         |         |         |
|-------------|---------|---------|---------|---------|---------|---------|
| frequencies | 1094.68 | 1120.59 | 1139.11 | 1150.33 | 1172.97 | 1199.85 |
| intensities | 17.51   | 30.94   | 13.91   | 70.97   | 11.41   | 74.14   |
| reduc. mass | 0.57    | 0.34    | 0.58    | 0.57    | 0.31    | 1.19    |
| force const | 0.41    | 0.25    | 0.45    | 0.44    | 0.25    | 1.01    |

vibration #      61    62    63    64    65    66

-----

|             |         |         |         |         |         |         |
|-------------|---------|---------|---------|---------|---------|---------|
| frequencies | 1233.77 | 1246.78 | 1252.74 | 1281.64 | 1305.72 | 1318.71 |
| intensities | 29.46   | 67.12   | 89.10   | 1.99    | 101.70  | 8.14    |
| reduc. mass | 0.55    | 0.20    | 0.85    | 0.27    | 1.02    | 0.42    |
| force const | 0.49    | 0.19    | 0.78    | 0.26    | 1.03    | 0.43    |

vibration #      67    68    69    70    71    72

-----

|             |         |         |         |         |         |         |
|-------------|---------|---------|---------|---------|---------|---------|
| frequencies | 1380.56 | 1392.34 | 1400.47 | 1427.87 | 1444.31 | 1465.61 |
|-------------|---------|---------|---------|---------|---------|---------|

|             |        |       |        |       |       |       |
|-------------|--------|-------|--------|-------|-------|-------|
| intensities | 185.73 | 26.87 | 280.85 | 74.57 | 82.06 | 66.77 |
| reduc. mass | 0.67   | 0.46  | 0.60   | 0.78  | 2.10  | 1.04  |
| force const | 0.76   | 0.53  | 0.69   | 0.93  | 2.58  | 1.32  |

vibration #      73    74    75    76    77    78

-----

|             |         |         |         |         |         |         |
|-------------|---------|---------|---------|---------|---------|---------|
| frequencies | 1487.72 | 1498.49 | 1507.18 | 1521.68 | 1526.98 | 1541.30 |
| intensities | 23.56   | 50.67   | 33.30   | 17.37   | 250.86  | 20.38   |
| reduc. mass | 0.60    | 0.51    | 0.60    | 0.74    | 1.54    | 0.54    |
| force const | 0.79    | 0.68    | 0.80    | 1.01    | 2.11    | 0.75    |

vibration #      79    80    81    82    83    84

-----

|             |         |         |         |         |         |         |
|-------------|---------|---------|---------|---------|---------|---------|
| frequencies | 1562.19 | 1571.96 | 1605.86 | 1628.11 | 1634.65 | 1644.29 |
| intensities | 16.14   | 17.45   | 30.12   | 113.48  | 51.79   | 28.90   |
| reduc. mass | 0.56    | 0.65    | 0.86    | 0.24    | 0.24    | 0.26    |
| force const | 0.80    | 0.94    | 1.31    | 0.38    | 0.37    | 0.41    |

vibration #      85    86    87    88    89    90

-----

|             |         |         |         |         |         |         |
|-------------|---------|---------|---------|---------|---------|---------|
| frequencies | 1648.17 | 1650.52 | 1655.79 | 1660.20 | 1662.40 | 1665.10 |
| intensities | 145.69  | 136.61  | 3.38    | 8.32    | 18.79   | 10.50   |
| reduc. mass | 0.27    | 0.39    | 0.20    | 0.35    | 0.21    | 0.35    |
| force const | 0.43    | 0.62    | 0.33    | 0.57    | 0.34    | 0.57    |

vibration #      91    92    93    94    95    96

-----

|             |         |         |         |         |         |         |
|-------------|---------|---------|---------|---------|---------|---------|
| frequencies | 1666.31 | 1669.27 | 1675.60 | 1691.66 | 1702.06 | 1784.21 |
| intensities | 67.36   | 4.27    | 12.99   | 302.99  | 41.76   | 633.53  |

|             |      |      |      |      |      |      |
|-------------|------|------|------|------|------|------|
| reduc. mass | 0.18 | 0.28 | 0.33 | 0.66 | 0.93 | 1.65 |
| force const | 0.30 | 0.46 | 0.55 | 1.11 | 1.59 | 3.10 |

vibration #      97    98    99    100    101    102

-----

|             |         |         |         |         |         |         |
|-------------|---------|---------|---------|---------|---------|---------|
| frequencies | 1835.03 | 1891.98 | 3022.80 | 3026.97 | 3047.36 | 3057.15 |
|-------------|---------|---------|---------|---------|---------|---------|

|             |        |       |        |        |         |        |
|-------------|--------|-------|--------|--------|---------|--------|
| intensities | 374.19 | 11.00 | 438.63 | 323.91 | 1057.39 | 195.64 |
|-------------|--------|-------|--------|--------|---------|--------|

|             |      |      |      |      |      |      |
|-------------|------|------|------|------|------|------|
| reduc. mass | 1.51 | 0.89 | 0.24 | 0.25 | 0.18 | 0.21 |
|-------------|------|------|------|------|------|------|

|             |      |      |      |      |      |      |
|-------------|------|------|------|------|------|------|
| force const | 2.99 | 1.87 | 1.28 | 1.36 | 1.00 | 1.16 |
|-------------|------|------|------|------|------|------|

vibration #      103    104    105    106    107    108

-----

|             |         |         |         |         |         |         |
|-------------|---------|---------|---------|---------|---------|---------|
| frequencies | 3071.38 | 3083.66 | 3091.54 | 3110.72 | 3117.84 | 3131.01 |
|-------------|---------|---------|---------|---------|---------|---------|

|             |        |        |        |       |        |        |
|-------------|--------|--------|--------|-------|--------|--------|
| intensities | 353.77 | 479.02 | 270.46 | 65.93 | 306.91 | 279.84 |
|-------------|--------|--------|--------|-------|--------|--------|

|             |      |      |      |      |      |      |
|-------------|------|------|------|------|------|------|
| reduc. mass | 0.42 | 0.80 | 0.72 | 0.70 | 0.26 | 0.28 |
|-------------|------|------|------|------|------|------|

|             |      |      |      |      |      |      |
|-------------|------|------|------|------|------|------|
| force const | 2.34 | 4.48 | 4.05 | 3.96 | 1.47 | 1.64 |
|-------------|------|------|------|------|------|------|

vibration #      109    110    111    112    113    114

-----

|             |         |         |         |         |         |         |
|-------------|---------|---------|---------|---------|---------|---------|
| frequencies | 3134.49 | 3135.68 | 3140.24 | 3142.36 | 3146.46 | 3150.29 |
|-------------|---------|---------|---------|---------|---------|---------|

|             |        |        |        |       |        |        |
|-------------|--------|--------|--------|-------|--------|--------|
| intensities | 729.97 | 246.37 | 474.07 | 96.31 | 354.42 | 207.05 |
|-------------|--------|--------|--------|-------|--------|--------|

|             |      |      |      |      |      |      |
|-------------|------|------|------|------|------|------|
| reduc. mass | 0.12 | 0.39 | 0.43 | 0.33 | 0.19 | 0.20 |
|-------------|------|------|------|------|------|------|

|             |      |      |      |      |      |      |
|-------------|------|------|------|------|------|------|
| force const | 0.72 | 2.25 | 2.48 | 1.92 | 1.13 | 1.17 |
|-------------|------|------|------|------|------|------|

vibration #      115    116    117    118    119    120

-----

|             |         |         |         |         |         |         |
|-------------|---------|---------|---------|---------|---------|---------|
| frequencies | 3155.05 | 3160.99 | 3190.32 | 3197.95 | 3828.74 | 3846.93 |
|-------------|---------|---------|---------|---------|---------|---------|

|             |        |        |        |        |       |        |
|-------------|--------|--------|--------|--------|-------|--------|
| intensities | 385.52 | 636.64 | 444.39 | 320.76 | 24.62 | 284.09 |
|-------------|--------|--------|--------|--------|-------|--------|

|             |      |      |      |      |      |      |
|-------------|------|------|------|------|------|------|
| reduc. mass | 0.27 | 0.52 | 0.17 | 0.54 | 0.95 | 0.95 |
|-------------|------|------|------|------|------|------|



force const    1.58   3.05   1.02   3.23   8.18   8.25

Number of imaginary frequencies: 0

## Conformation 5

Boltzmann Population = 1.0% (relative energy = 2.29 kcal/mol)

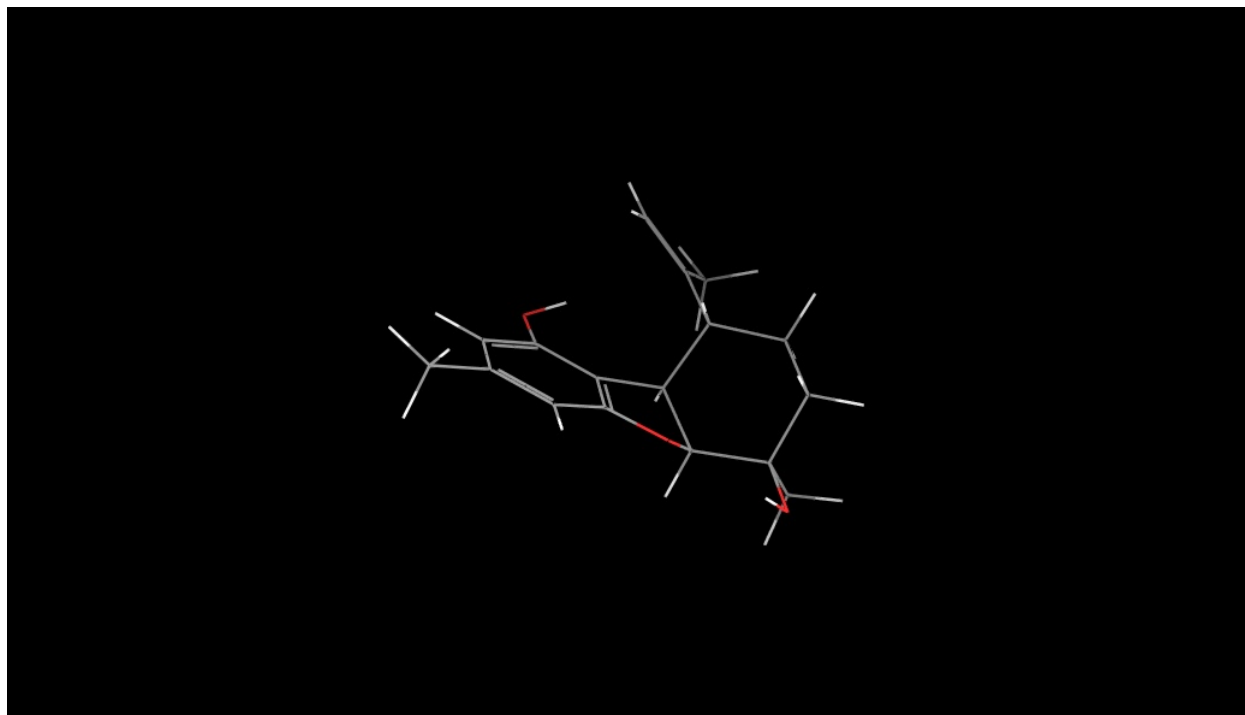

Geometries and Energy Method: M06-2X-D3/6-31G(d,p)

NMR Method: mPW1PW91/6-311+G(2d,p)

Thermodynamic properties for P = 1.00 atm, calculated at 1 temperatures

T = 298.15 K, P = 1.00 atm

Total internal energy,  $U_{\text{tot}}(\text{SCFE} + \text{ZPE} + U)$ : -885.981795 hartrees

Total enthalpy,  $H_{\text{tot}}(U_{\text{tot}} + pV)$ : -885.980851 hartrees

Total Gibbs free energy,  $G_{\text{tot}}(H_{\text{tot}} - T^*S)$ : -886.042851 hartrees

Optimized Geometry:

| Center<br>Number | Atomic<br>Number | Atomic<br>Type | Coordinates (Angstroms) |          |          |
|------------------|------------------|----------------|-------------------------|----------|----------|
|                  |                  |                | X                       | Y        | Z        |
| 1                | 6                | 0              | -4.337900               | 1.038900 | 0.620200 |
| 2                | 6                | 0              | -3.900300               | 0.834500 | 2.069500 |
| 3                | 6                | 0              | -5.082300               | 1.070100 | 3.019200 |
| 4                | 6                | 0              | -5.735900               | 2.469600 | 2.826700 |

|    |   |   |            |           |           |
|----|---|---|------------|-----------|-----------|
| 5  | 6 | 0 | -5.914800  | 2.860100  | 1.343100  |
| 6  | 6 | 0 | -4.807400  | 2.474300  | 0.362500  |
| 7  | 6 | 0 | -3.662300  | 3.476400  | 0.475700  |
| 8  | 6 | 0 | -4.723100  | 0.858500  | 4.475600  |
| 9  | 6 | 0 | -7.199500  | 2.427000  | 3.224700  |
| 10 | 6 | 0 | -7.937700  | 2.210900  | 2.059300  |
| 11 | 6 | 0 | -7.873400  | 2.474100  | 4.438600  |
| 12 | 6 | 0 | -9.266100  | 2.319300  | 4.447400  |
| 13 | 6 | 0 | -9.977900  | 2.097200  | 3.272200  |
| 14 | 6 | 0 | -9.306300  | 2.036400  | 2.041900  |
| 15 | 8 | 0 | -7.254200  | 2.689400  | 5.629800  |
| 16 | 8 | 0 | -7.139500  | 2.208000  | 0.944700  |
| 17 | 8 | 0 | -5.298700  | 2.603200  | -0.959600 |
| 18 | 6 | 0 | -11.477700 | 1.943000  | 3.304900  |
| 19 | 6 | 0 | -3.452400  | 1.497700  | 4.976900  |
| 20 | 6 | 0 | -5.513100  | 0.143100  | 5.281800  |
| 21 | 1 | 0 | -3.529000  | 0.811100  | -0.080900 |
| 22 | 1 | 0 | -5.169300  | 0.359700  | 0.390600  |
| 23 | 1 | 0 | -3.069100  | 1.508500  | 2.308400  |
| 24 | 1 | 0 | -3.526200  | -0.184600 | 2.216900  |
| 25 | 1 | 0 | -5.853400  | 0.335300  | 2.754400  |
| 26 | 1 | 0 | -5.160200  | 3.240400  | 3.352500  |
| 27 | 1 | 0 | -6.095000  | 3.942900  | 1.275700  |
| 28 | 1 | 0 | -2.843200  | 3.174800  | -0.181900 |
| 29 | 1 | 0 | -4.013600  | 4.460700  | 0.157900  |
| 30 | 1 | 0 | -3.281500  | 3.553900  | 1.497700  |
| 31 | 1 | 0 | -9.775400  | 2.365500  | 5.404300  |
| 32 | 1 | 0 | -9.837500  | 1.877800  | 1.109900  |
| 33 | 1 | 0 | -6.343400  | 2.371700  | 5.560800  |
| 34 | 1 | 0 | -6.153600  | 2.152700  | -0.986700 |
| 35 | 1 | 0 | -11.839200 | 1.787300  | 4.323100  |
| 36 | 1 | 0 | -11.967800 | 2.837000  | 2.906900  |
| 37 | 1 | 0 | -11.798200 | 1.095200  | 2.693100  |
| 38 | 1 | 0 | -3.382200  | 2.550100  | 4.678000  |
| 39 | 1 | 0 | -3.386000  | 1.444100  | 6.065600  |
| 40 | 1 | 0 | -2.574800  | 0.993100  | 4.559100  |
| 41 | 1 | 0 | -5.278000  | 0.003900  | 6.333300  |
| 42 | 1 | 0 | -6.422300  | -0.321900 | 4.911300  |

-----

SCF GIAO Magnetic shielding tensor (ppm):

|              |   |             |          |              |                   |          |
|--------------|---|-------------|----------|--------------|-------------------|----------|
| 1            | C | Isotropic = | 149.3241 | Anisotropy = | 23.2609           |          |
| XX=          |   | 139.0885    | YX=      | 0.2028       | ZX=               | 4.1897   |
| XY=          |   | 6.5478      | YY=      | 158.3157     | ZY=               | -6.5591  |
| XZ=          |   | -1.4588     | YZ=      | -12.3659     | <td>150.5680</td> | 150.5680 |
| Eigenvalues: |   | 137.5678    | 145.5730 | 164.8314     |                   |          |
| 2            | C | Isotropic = | 157.3298 | Anisotropy = | 15.5712           |          |
| XX=          |   | 158.4955    | YX=      | 6.9959       | ZX=               | 5.8864   |
| XY=          |   | 4.0987      | YY=      | 163.1002     | ZY=               | -1.5984  |

|              |             |          |          |              |          |          |
|--------------|-------------|----------|----------|--------------|----------|----------|
| XZ=          | 7.2253      | YZ=      | 1.7259   | ZZ=          | 150.3937 |          |
| Eigenvalues: | 146.2812    |          | 157.9976 |              | 167.7106 |          |
| 3 C          | Isotropic = | 133.5740 |          | Anisotropy = |          | 13.9149  |
| XX=          | 136.1288    | YX=      | 1.2017   | ZX=          | 2.1565   |          |
| XY=          | -7.3090     | YY=      | 138.4727 | ZY=          | 5.7760   |          |
| XZ=          | 0.4425      | YZ=      | 9.4449   | ZZ=          | 126.1204 |          |
| Eigenvalues: | 122.0486    |          | 135.8227 |              | 142.8506 |          |
| 4 C          | Isotropic = | 140.4911 |          | Anisotropy = |          | 21.9131  |
| XX=          | 144.9325    | YX=      | 1.5344   | ZX=          | 2.6468   |          |
| XY=          | 2.0908      | YY=      | 149.0615 | ZY=          | -1.2295  |          |
| XZ=          | 7.8616      | YZ=      | -24.5051 | ZZ=          | 127.4794 |          |
| Eigenvalues: | 120.2392    |          | 146.1343 |              | 155.0998 |          |
| 5 C          | Isotropic = | 95.1782  |          | Anisotropy = |          | 58.9468  |
| XX=          | 119.1960    | YX=      | -5.4878  | ZX=          | -23.7772 |          |
| XY=          | -2.1528     | YY=      | 88.2384  | ZY=          | 25.5339  |          |
| XZ=          | -28.2618    | YZ=      | 8.2102   | ZZ=          | 78.1001  |          |
| Eigenvalues: | 58.9047     |          | 92.1537  |              | 134.4761 |          |
| 6 C          | Isotropic = | 115.9770 |          | Anisotropy = |          | 48.9134  |
| XX=          | 96.8248     | YX=      | -4.7467  | ZX=          | -1.3647  |          |
| XY=          | 7.0581      | YY=      | 147.3515 | ZY=          | 5.8786   |          |
| XZ=          | -1.5202     | YZ=      | 8.9013   | ZZ=          | 103.7548 |          |
| Eigenvalues: | 96.3869     |          | 102.9583 |              | 148.5859 |          |
| 7 C          | Isotropic = | 162.8845 |          | Anisotropy = |          | 39.0527  |
| XX=          | 171.7223    | YX=      | -4.9375  | ZX=          | -16.2834 |          |
| XY=          | -4.1064     | YY=      | 146.1289 | ZY=          | 0.8553   |          |
| XZ=          | -18.2791    | YZ=      | 1.2423   | ZZ=          | 170.8022 |          |
| Eigenvalues: | 145.1140    |          | 154.6198 |              | 188.9196 |          |
| 8 C          | Isotropic = | 28.5367  |          | Anisotropy = |          | 192.2129 |
| XX=          | 55.8081     | YX=      | 12.6726  | ZX=          | 78.0603  |          |
| XY=          | 19.5756     | YY=      | -51.1930 | ZY=          | -64.2157 |          |
| XZ=          | 80.6387     | YZ=      | -65.5159 | ZZ=          | 80.9950  |          |
| Eigenvalues: | -93.6277    |          | 22.5591  |              | 156.6786 |          |
| 9 C          | Isotropic = | 66.0091  |          | Anisotropy = |          | 109.2488 |
| XX=          | 20.2683     | YX=      | -1.4795  | ZX=          | 8.9404   |          |
| XY=          | 12.6488     | YY=      | 58.8892  | ZY=          | -36.6279 |          |
| XZ=          | 21.9866     | YZ=      | -40.4816 | ZZ=          | 118.8698 |          |
| Eigenvalues: | 13.8790     |          | 45.3067  |              | 138.8417 |          |
| 10 C         | Isotropic = | 21.5533  |          | Anisotropy = |          | 110.5426 |
| XX=          | -25.0157    | YX=      | -37.7847 | ZX=          | -1.1425  |          |
| XY=          | -46.8389    | YY=      | 2.6820   | ZY=          | -31.5989 |          |
| XZ=          | -10.4817    | YZ=      | -22.2665 | ZZ=          | 86.9937  |          |
| Eigenvalues: | -58.6513    |          | 28.0629  |              | 95.2484  |          |
| 11 C         | Isotropic = | 28.0455  |          | Anisotropy = |          | 133.8140 |
| XX=          | 15.9720     | YX=      | 11.2461  | ZX=          | 10.9278  |          |
| XY=          | 6.0669      | YY=      | -26.3463 | ZY=          | -58.8657 |          |
| XZ=          | 5.0835      | YZ=      | -54.9096 | ZZ=          | 94.5110  |          |
| Eigenvalues: | -50.7271    |          | 17.6089  |              | 117.2549 |          |
| 12 C         | Isotropic = | 71.7932  |          | Anisotropy = |          | 116.6569 |
| XX=          | 23.8337     | YX=      | -33.8625 | ZX=          | -4.6820  |          |
| XY=          | -45.8769    | YY=      | 52.7487  | ZY=          | -35.9575 |          |
| XZ=          | -2.9836     | YZ=      | -26.3558 | ZZ=          | 138.7973 |          |
| Eigenvalues: | -7.2784     |          | 73.0936  |              | 149.5645 |          |

|              |          |             |          |              |          |
|--------------|----------|-------------|----------|--------------|----------|
| 13           | C        | Isotropic = | 41.1624  | Anisotropy = | 194.5255 |
| XX=          | -44.5683 | YX=         | 12.3244  | ZX=          | 22.1840  |
| XY=          | 15.6495  | YY=         | 26.9605  | ZY=          | -62.6264 |
| XZ=          | 29.1355  | YZ=         | -64.2649 | ZZ=          | 141.0950 |
| Eigenvalues: | -55.8509 |             | 8.4920   |              | 170.8460 |
| 14           | C        | Isotropic = | 80.6448  | Anisotropy = | 123.6616 |
| XX=          | 73.1995  | YX=         | -5.1447  | ZX=          | 6.5586   |
| XY=          | 10.9877  | YY=         | 26.6321  | ZY=          | -56.9772 |
| XZ=          | 7.3429   | YZ=         | -49.0767 | ZZ=          | 142.1027 |
| Eigenvalues: | 5.5680   |             | 73.2805  |              | 163.0859 |
| 15           | O        | Isotropic = | 206.1317 | Anisotropy = | 80.9961  |
| XX=          | 153.8566 | YX=         | -3.0231  | ZX=          | -1.0340  |
| XY=          | -13.8122 | YY=         | 206.3771 | ZY=          | -21.3394 |
| XZ=          | 29.6629  | YZ=         | 20.7053  | ZZ=          | 258.1613 |
| Eigenvalues: | 150.6903 |             | 207.5756 |              | 260.1291 |
| 16           | O        | Isotropic = | 192.6242 | Anisotropy = | 105.4835 |
| XX=          | 217.2589 | YX=         | 60.6673  | ZX=          | 33.2480  |
| XY=          | 50.3759  | YY=         | 166.5473 | ZY=          | -34.0171 |
| XZ=          | 27.0213  | YZ=         | 36.0757  | ZZ=          | 194.0663 |
| Eigenvalues: | 127.0105 |             | 187.9155 |              | 262.9465 |
| 17           | O        | Isotropic = | 255.5476 | Anisotropy = | 52.8293  |
| XX=          | 235.9309 | YX=         | -19.5398 | ZX=          | -17.9908 |
| XY=          | -13.1160 | YY=         | 281.2941 | ZY=          | 7.9134   |
| XZ=          | -27.0244 | YZ=         | 3.0200   | ZZ=          | 249.4178 |
| Eigenvalues: | 217.5564 |             | 258.3192 |              | 290.7671 |
| 18           | C        | Isotropic = | 163.9935 | Anisotropy = | 41.2375  |
| XX=          | 187.5340 | YX=         | -5.3692  | ZX=          | -9.3405  |
| XY=          | -11.3678 | YY=         | 157.1281 | ZY=          | 8.2551   |
| XZ=          | -5.4093  | YZ=         | 5.4777   | ZZ=          | 147.3183 |
| Eigenvalues: | 143.5842 |             | 156.9111 |              | 191.4851 |
| 19           | C        | Isotropic = | 167.4263 | Anisotropy = | 26.7948  |
| XX=          | 167.3627 | YX=         | -5.7726  | ZX=          | -9.9776  |
| XY=          | -9.1661  | YY=         | 169.6025 | ZY=          | 11.1304  |
| XZ=          | -8.7023  | YZ=         | 8.6545   | ZZ=          | 165.3136 |
| Eigenvalues: | 156.0109 |             | 160.9784 |              | 185.2895 |
| 20           | C        | Isotropic = | 65.4300  | Anisotropy = | 116.5361 |
| XX=          | 101.6202 | YX=         | 24.6473  | ZX=          | 35.5050  |
| XY=          | 20.4125  | YY=         | -6.1577  | ZY=          | -55.8731 |
| XZ=          | 40.6627  | YZ=         | -48.9305 | ZZ=          | 100.8274 |
| Eigenvalues: | -36.8251 |             | 89.9943  |              | 143.1207 |
| 21           | H        | Isotropic = | 30.1089  | Anisotropy = | 8.5909   |
| XX=          | 32.9161  | YX=         | 2.4806   | ZX=          | 3.5015   |
| XY=          | 2.4647   | YY=         | 28.9100  | ZY=          | 0.2414   |
| XZ=          | 3.8599   | YZ=         | 0.7440   | ZZ=          | 28.5006  |
| Eigenvalues: | 26.1248  |             | 28.3658  |              | 35.8361  |
| 22           | H        | Isotropic = | 30.0319  | Anisotropy = | 5.5791   |
| XX=          | 28.1732  | YX=         | 0.1747   | ZX=          | -0.6693  |
| XY=          | -0.7996  | YY=         | 28.9933  | ZY=          | 1.3496   |
| XZ=          | 0.0706   | YZ=         | 2.5262   | ZZ=          | 32.9293  |
| Eigenvalues: | 27.9950  |             | 28.3495  |              | 33.7513  |
| 23           | H        | Isotropic = | 30.2019  | Anisotropy = | 5.7831   |
| XX=          | 31.2180  | YX=         | -1.1380  | ZX=          | -2.2381  |

|              |             |         |              |     |         |         |  |
|--------------|-------------|---------|--------------|-----|---------|---------|--|
| XY=          | -1.3271     | YY=     | 32.8253      | ZY= | 1.5386  |         |  |
| XZ=          | -1.5659     | YZ=     | 0.9748       | ZZ= | 26.5625 |         |  |
| Eigenvalues: | 25.7948     |         | 30.7536      |     | 34.0574 |         |  |
| 24 H         | Isotropic = | 30.3743 | Anisotropy = |     |         | 9.8073  |  |
| XX=          | 29.0106     | YX=     | -0.7875      | ZX= | 4.3202  |         |  |
| XY=          | -1.1296     | YY=     | 30.8372      | ZY= | -3.8500 |         |  |
| XZ=          | 5.1935      | YZ=     | -3.1274      | ZZ= | 31.2750 |         |  |
| Eigenvalues: | 24.8471     |         | 29.3631      |     | 36.9125 |         |  |
| 25 H         | Isotropic = | 29.5933 | Anisotropy = |     |         | 2.3334  |  |
| XX=          | 30.0015     | YX=     | 1.5043       | ZX= | -1.4694 |         |  |
| XY=          | -0.3818     | YY=     | 28.7532      | ZY= | -0.4649 |         |  |
| XZ=          | 0.4071      | YZ=     | -1.7446      | ZZ= | 30.0252 |         |  |
| Eigenvalues: | 28.0860     |         | 29.5450      |     | 31.1489 |         |  |
| 26 H         | Isotropic = | 28.7428 | Anisotropy = |     |         | 4.1254  |  |
| XX=          | 27.3113     | YX=     | -0.7562      | ZX= | 0.5800  |         |  |
| XY=          | 1.1055      | YY=     | 29.5113      | ZY= | 2.1151  |         |  |
| XZ=          | -1.0163     | YZ=     | 1.9521       | ZZ= | 29.4060 |         |  |
| Eigenvalues: | 27.0839     |         | 27.6516      |     | 31.4931 |         |  |
| 27 H         | Isotropic = | 27.6162 | Anisotropy = |     |         | 5.5923  |  |
| XX=          | 27.2170     | YX=     | -1.0854      | ZX= | -1.7029 |         |  |
| XY=          | 0.7140      | YY=     | 26.4047      | ZY= | -0.6267 |         |  |
| XZ=          | -3.4189     | YZ=     | -2.8325      | ZZ= | 29.2270 |         |  |
| Eigenvalues: | 24.6249     |         | 26.8793      |     | 31.3445 |         |  |
| 28 H         | Isotropic = | 30.6540 | Anisotropy = |     |         | 9.8734  |  |
| XX=          | 36.8187     | YX=     | 1.7195       | ZX= | -0.5520 |         |  |
| XY=          | 1.1599      | YY=     | 27.1859      | ZY= | -0.3612 |         |  |
| XZ=          | -2.1435     | YZ=     | -0.3588      | ZZ= | 27.9573 |         |  |
| Eigenvalues: | 26.9438     |         | 27.7819      |     | 37.2362 |         |  |
| 29 H         | Isotropic = | 30.6357 | Anisotropy = |     |         | 9.1637  |  |
| XX=          | 28.6028     | YX=     | 0.6495       | ZX= | -2.1291 |         |  |
| XY=          | 0.4100      | YY=     | 28.8927      | ZY= | -3.0675 |         |  |
| XZ=          | -1.8985     | YZ=     | -4.2461      | ZZ= | 34.4114 |         |  |
| Eigenvalues: | 26.9251     |         | 28.2370      |     | 36.7448 |         |  |
| 30 H         | Isotropic = | 30.4079 | Anisotropy = |     |         | 6.4586  |  |
| XX=          | 28.5512     | YX=     | -0.3326      | ZX= | -3.3879 |         |  |
| XY=          | 0.2122      | YY=     | 32.7292      | ZY= | 1.8598  |         |  |
| XZ=          | -3.6769     | YZ=     | 2.7387       | ZZ= | 29.9432 |         |  |
| Eigenvalues: | 25.3585     |         | 31.1516      |     | 34.7136 |         |  |
| 31 H         | Isotropic = | 25.2207 | Anisotropy = |     |         | 6.7155  |  |
| XX=          | 27.3252     | YX=     | -2.3116      | ZX= | -1.1952 |         |  |
| XY=          | -2.3341     | YY=     | 25.9580      | ZY= | 2.0463  |         |  |
| XZ=          | -0.9336     | YZ=     | 2.2023       | ZZ= | 22.3788 |         |  |
| Eigenvalues: | 21.3908     |         | 24.5736      |     | 29.6977 |         |  |
| 32 H         | Isotropic = | 25.2883 | Anisotropy = |     |         | 7.5290  |  |
| XX=          | 30.2151     | YX=     | -0.0315      | ZX= | -0.7793 |         |  |
| XY=          | -0.5855     | YY=     | 24.0016      | ZY= | 1.1839  |         |  |
| XZ=          | -0.7074     | YZ=     | 1.3963       | ZZ= | 21.6483 |         |  |
| Eigenvalues: | 21.0448     |         | 24.5125      |     | 30.3077 |         |  |
| 33 H         | Isotropic = | 26.9158 | Anisotropy = |     |         | 18.3611 |  |
| XX=          | 34.0833     | YX=     | -4.1435      | ZX= | 6.9983  |         |  |
| XY=          | -6.0269     | YY=     | 27.8635      | ZY= | 0.4253  |         |  |
| XZ=          | 7.2752      | YZ=     | -2.1080      | ZZ= | 18.8006 |         |  |

|              |             |         |              |         |         |
|--------------|-------------|---------|--------------|---------|---------|
| Eigenvalues: | 15.8774     | 25.7135 | 39.1565      |         |         |
| 34 H         | Isotropic = | 29.9813 | Anisotropy = | 15.8901 |         |
| XX=          | 33.3611     | YX=     | -2.0326      | ZX=     | -6.7870 |
| XY=          | -3.1024     | YY=     | 31.7848      | ZY=     | 6.0034  |
| XZ=          | -7.0389     | YZ=     | 6.0558       | ZZ=     | 24.7980 |
| Eigenvalues: | 19.4555     | 29.9136 | 40.5747      |         |         |
| 35 H         | Isotropic = | 29.8140 | Anisotropy = | 7.9203  |         |
| XX=          | 33.9985     | YX=     | 3.4298       | ZX=     | -0.7475 |
| XY=          | 1.0955      | YY=     | 30.2209      | ZY=     | 1.3050  |
| XZ=          | -1.6390     | YZ=     | 0.9959       | ZZ=     | 25.2228 |
| Eigenvalues: | 24.6572     | 29.6907 | 35.0942      |         |         |
| 36 H         | Isotropic = | 29.3222 | Anisotropy = | 8.9252  |         |
| XX=          | 30.8573     | YX=     | -3.4840      | ZX=     | 1.4887  |
| XY=          | -3.1985     | YY=     | 30.3397      | ZY=     | -2.2120 |
| XZ=          | 2.6912      | YZ=     | -3.1247      | ZZ=     | 26.7696 |
| Eigenvalues: | 25.3211     | 27.3731 | 35.2723      |         |         |
| 37 H         | Isotropic = | 29.4795 | Anisotropy = | 8.0885  |         |
| XX=          | 30.1236     | YX=     | -1.7223      | ZX=     | -2.6441 |
| XY=          | -0.0810     | YY=     | 27.4603      | ZY=     | 3.6711  |
| XZ=          | -2.2196     | YZ=     | 4.3647       | ZZ=     | 30.8547 |
| Eigenvalues: | 24.7208     | 28.8459 | 34.8718      |         |         |
| 38 H         | Isotropic = | 29.9193 | Anisotropy = | 4.5734  |         |
| XX=          | 26.9240     | YX=     | -0.2140      | ZX=     | -2.0943 |
| XY=          | -1.0722     | YY=     | 30.8039      | ZY=     | 1.0949  |
| XZ=          | -2.3403     | YZ=     | -0.5434      | ZZ=     | 32.0299 |
| Eigenvalues: | 26.0414     | 30.7482 | 32.9682      |         |         |
| 39 H         | Isotropic = | 29.9516 | Anisotropy = | 8.3784  |         |
| XX=          | 28.3504     | YX=     | 0.2662       | ZX=     | -0.9197 |
| XY=          | 1.5441      | YY=     | 34.8552      | ZY=     | 1.8404  |
| XZ=          | -0.2956     | YZ=     | 2.7932       | ZZ=     | 26.6492 |
| Eigenvalues: | 25.7751     | 28.5426 | 35.5372      |         |         |
| 40 H         | Isotropic = | 29.8794 | Anisotropy = | 8.0652  |         |
| XX=          | 33.4936     | YX=     | -2.1805      | ZX=     | 1.7947  |
| XY=          | -2.9571     | YY=     | 30.6121      | ZY=     | 0.8525  |
| XZ=          | 2.4219      | YZ=     | 0.1997       | ZZ=     | 25.5326 |
| Eigenvalues: | 24.7651     | 29.6169 | 35.2562      |         |         |
| 41 H         | Isotropic = | 26.6094 | Anisotropy = | 5.7354  |         |
| XX=          | 27.8841     | YX=     | 3.3272       | ZX=     | -0.9679 |
| XY=          | 0.4350      | YY=     | 26.5648      | ZY=     | -1.5879 |
| XZ=          | -1.0851     | YZ=     | -3.6815      | ZZ=     | 25.3791 |
| Eigenvalues: | 23.2349     | 26.1602 | 30.4330      |         |         |
| 42 H         | Isotropic = | 26.6315 | Anisotropy = | 7.0518  |         |
| XX=          | 27.1592     | YX=     | 0.4471       | ZX=     | -1.1746 |
| XY=          | 2.6816      | YY=     | 25.7350      | ZY=     | -4.2662 |
| XZ=          | -0.4592     | YZ=     | -4.2669      | ZZ=     | 27.0001 |
| Eigenvalues: | 21.9676     | 26.5941 | 31.3326      |         |         |

Number of frequencies: 120

harmonic frequencies in  $\text{cm}^{-1}$ , reduced masses in amu,

force constants in mDyne/A, and

normal modes in cartesian coordinates: 120

IR intensities in  $\text{km/mol}$

vibration #      1    2    3    4    5    6

-----

frequencies      50.06 75.50 96.54 106.21 138.48 152.35

intensities      0.56 1.23 1.16 0.34 0.72 1.05

reduc. mass      1.12 0.94 1.05 1.84 0.29 1.31

force const      0.00 0.00 0.01 0.01 0.00 0.02

vibration #      7    8    9    10   11   12

-----

frequencies      174.20 206.98 222.92 231.97 247.86 263.11

intensities      0.49 0.14 1.04 2.75 0.61 0.28

reduc. mass      0.72 0.68 1.12 0.42 0.53 0.82

force const      0.01 0.02 0.03 0.01 0.02 0.03

vibration #      13   14   15   16   17   18

-----

frequencies      270.49 282.07 302.72 306.60 322.48 344.44

intensities      6.83 0.06 0.96 2.08 5.66 0.77

reduc. mass      0.98 1.06 0.66 0.91 0.47 0.83

force const      0.04 0.05 0.04 0.05 0.03 0.06

vibration #      19   20   21   22   23   24

-----



|             |        |        |        |        |        |        |
|-------------|--------|--------|--------|--------|--------|--------|
| frequencies | 368.92 | 416.64 | 424.00 | 470.36 | 495.28 | 507.32 |
| intensities | 0.31   | 0.70   | 3.86   | 2.42   | 21.16  | 3.18   |
| reduc. mass | 1.18   | 0.99   | 0.61   | 0.54   | 1.01   | 0.66   |
| force const | 0.09   | 0.10   | 0.06   | 0.07   | 0.15   | 0.10   |

vibration #      25    26    27    28    29    30

-----

|             |        |        |        |        |        |        |
|-------------|--------|--------|--------|--------|--------|--------|
| frequencies | 521.43 | 527.67 | 546.95 | 567.04 | 592.35 | 619.07 |
| intensities | 4.11   | 4.89   | 4.36   | 14.18  | 25.67  | 99.27  |
| reduc. mass | 1.45   | 0.79   | 0.64   | 0.55   | 2.10   | 0.71   |
| force const | 0.23   | 0.13   | 0.11   | 0.10   | 0.43   | 0.16   |

vibration #      31    32    33    34    35    36

-----

|             |        |        |        |        |        |        |
|-------------|--------|--------|--------|--------|--------|--------|
| frequencies | 630.34 | 660.54 | 677.90 | 699.50 | 725.93 | 743.78 |
| intensities | 99.34  | 2.32   | 4.67   | 8.19   | 13.28  | 3.36   |
| reduc. mass | 0.71   | 0.75   | 0.74   | 0.54   | 0.38   | 0.42   |
| force const | 0.17   | 0.19   | 0.20   | 0.16   | 0.12   | 0.14   |

vibration #      37    38    39    40    41    42

-----

|             |        |        |        |        |        |        |
|-------------|--------|--------|--------|--------|--------|--------|
| frequencies | 746.44 | 799.00 | 818.99 | 827.61 | 865.32 | 924.34 |
| intensities | 12.76  | 7.42   | 3.88   | 2.07   | 12.06  | 1.49   |
| reduc. mass | 1.00   | 0.55   | 0.86   | 1.78   | 0.52   | 0.69   |
| force const | 0.33   | 0.21   | 0.34   | 0.72   | 0.23   | 0.35   |

vibration #      43    44    45    46    47    48

-----

|             |        |        |        |        |         |         |
|-------------|--------|--------|--------|--------|---------|---------|
| frequencies | 930.36 | 950.88 | 964.89 | 993.96 | 1011.09 | 1022.57 |
|-------------|--------|--------|--------|--------|---------|---------|

|             |      |       |       |       |      |      |
|-------------|------|-------|-------|-------|------|------|
| intensities | 7.48 | 12.55 | 13.84 | 10.88 | 3.59 | 7.12 |
| reduc. mass | 0.69 | 1.23  | 0.27  | 0.36  | 0.27 | 0.20 |
| force const | 0.35 | 0.66  | 0.15  | 0.21  | 0.16 | 0.12 |

vibration #      49    50    51    52    53    54

-----

|             |         |         |         |         |         |         |
|-------------|---------|---------|---------|---------|---------|---------|
| frequencies | 1031.03 | 1040.56 | 1050.13 | 1058.90 | 1067.21 | 1090.29 |
| intensities | 27.89   | 18.60   | 3.76    | 23.10   | 33.89   | 28.40   |
| reduc. mass | 0.35    | 0.40    | 0.45    | 0.29    | 0.26    | 0.29    |
| force const | 0.22    | 0.25    | 0.29    | 0.19    | 0.17    | 0.21    |

vibration #      55    56    57    58    59    60

-----

|             |         |         |         |         |         |         |
|-------------|---------|---------|---------|---------|---------|---------|
| frequencies | 1099.05 | 1128.40 | 1132.17 | 1150.92 | 1162.60 | 1225.99 |
| intensities | 8.26    | 20.14   | 41.25   | 22.03   | 29.05   | 61.50   |
| reduc. mass | 0.43    | 0.37    | 0.35    | 0.48    | 0.69    | 0.66    |
| force const | 0.31    | 0.28    | 0.27    | 0.37    | 0.55    | 0.59    |

vibration #      61    62    63    64    65    66

-----

|             |         |         |         |         |         |         |
|-------------|---------|---------|---------|---------|---------|---------|
| frequencies | 1238.56 | 1248.02 | 1258.80 | 1298.93 | 1303.72 | 1340.53 |
| intensities | 30.80   | 43.64   | 56.12   | 95.57   | 78.75   | 74.52   |
| reduc. mass | 0.26    | 0.19    | 0.71    | 0.62    | 1.56    | 0.45    |
| force const | 0.23    | 0.18    | 0.66    | 0.61    | 1.56    | 0.47    |

vibration #      67    68    69    70    71    72

-----

|             |         |         |         |         |         |         |
|-------------|---------|---------|---------|---------|---------|---------|
| frequencies | 1346.78 | 1377.44 | 1398.48 | 1402.25 | 1410.72 | 1474.13 |
| intensities | 28.57   | 350.75  | 151.69  | 134.50  | 55.17   | 71.99   |

|             |      |      |      |      |      |      |
|-------------|------|------|------|------|------|------|
| reduc. mass | 0.94 | 0.68 | 0.42 | 1.06 | 0.40 | 1.44 |
| force const | 1.00 | 0.76 | 0.48 | 1.23 | 0.47 | 1.85 |

vibration #      73    74    75    76    77    78

-----

|             |         |         |         |         |         |         |
|-------------|---------|---------|---------|---------|---------|---------|
| frequencies | 1487.21 | 1491.68 | 1508.23 | 1524.58 | 1535.91 | 1537.09 |
| intensities | 1.92    | 3.97    | 148.11  | 86.61   | 30.51   | 104.89  |
| reduc. mass | 0.81    | 0.67    | 1.07    | 0.65    | 0.82    | 0.94    |
| force const | 1.05    | 0.87    | 1.43    | 0.90    | 1.14    | 1.30    |

vibration #      79    80    81    82    83    84

-----

|             |         |         |         |         |         |         |
|-------------|---------|---------|---------|---------|---------|---------|
| frequencies | 1572.73 | 1580.31 | 1604.76 | 1622.92 | 1638.78 | 1647.65 |
| intensities | 18.72   | 34.64   | 7.93    | 16.84   | 66.78   | 97.14   |
| reduc. mass | 0.70    | 0.73    | 0.55    | 0.57    | 0.19    | 0.35    |
| force const | 1.02    | 1.07    | 0.84    | 0.89    | 0.30    | 0.56    |

vibration #      85    86    87    88    89    90

-----

|             |         |         |         |         |         |         |
|-------------|---------|---------|---------|---------|---------|---------|
| frequencies | 1655.05 | 1657.35 | 1659.68 | 1660.56 | 1664.89 | 1666.82 |
| intensities | 28.55   | 10.49   | 47.66   | 15.97   | 8.85    | 80.59   |
| reduc. mass | 0.17    | 0.17    | 0.20    | 0.17    | 0.17    | 0.15    |
| force const | 0.27    | 0.27    | 0.33    | 0.27    | 0.28    | 0.24    |

vibration #      91    92    93    94    95    96

-----

|             |         |         |         |         |         |         |
|-------------|---------|---------|---------|---------|---------|---------|
| frequencies | 1669.06 | 1676.81 | 1682.08 | 1693.38 | 1727.59 | 1802.77 |
| intensities | 4.45    | 61.31   | 40.12   | 7.61    | 35.53   | 743.99  |
| reduc. mass | 0.16    | 0.27    | 0.40    | 1.62    | 1.05    | 1.56    |

force const 0.27 0.45 0.66 2.74 1.85 2.99

vibration # 97 98 99 100 101 102

-----

frequencies 1837.14 1889.55 3024.32 3028.70 3036.50 3053.58

intensities 421.20 9.37 523.52 192.92 655.27 421.63

reduc. mass 1.37 0.88 0.31 0.32 0.28 0.51

force const 2.73 1.84 1.65 1.71 1.51 2.81

vibration # 103 104 105 106 107 108

-----

frequencies 3063.28 3073.84 3086.79 3096.74 3104.40 3123.26

intensities 380.21 389.85 361.31 20.65 340.08 544.45

reduc. mass 0.44 0.85 0.43 0.44 0.38 0.43

force const 2.44 4.75 2.43 2.51 2.16 2.46

vibration # 109 110 111 112 113 114

-----

frequencies 3126.90 3129.34 3137.92 3144.36 3146.91 3148.96

intensities 321.56 389.49 534.24 708.63 242.91 187.83

reduc. mass 0.34 0.31 0.50 0.28 0.21 0.18

force const 1.94 1.81 2.90 1.66 1.22 1.08

vibration # 115 116 117 118 119 120

-----

frequencies 3155.54 3164.04 3169.93 3197.74 3832.33 3842.21

intensities 334.82 612.28 200.52 277.08 60.83 20.90

reduc. mass 0.43 0.19 0.37 0.54 0.75 0.75

force const 2.51 1.14 2.17 3.23 6.48 6.52

Number of imaginary frequencies: 0

## Conformation 6

Boltzmann Population = 50.1% (relative energy = 0.00 kcal/mol)

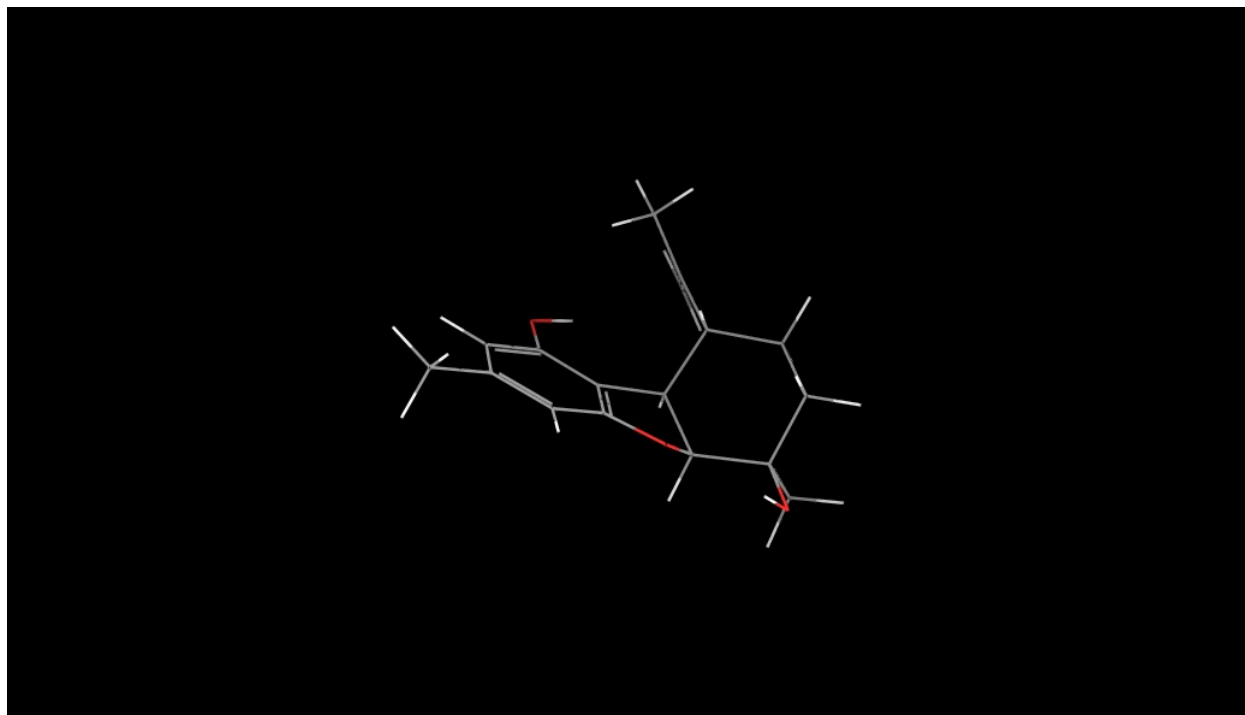

Geometries and Energy Method: M06-2X-D3/6-31G(d,p)

NMR Method: mPW1PW91/6-311+G(2d,p)

Thermodynamic properties for P = 1.00 atm, calculated at 1 temperatures

T = 298.15 K, P = 1.00 atm

Total internal energy,  $U_{\text{tot}}(\text{SCFE} + \text{ZPE} + U)$ : -885.982993 hartrees

Total enthalpy,  $H_{\text{tot}}(U_{\text{tot}} + pV)$ : -885.982049 hartrees

Total Gibbs free energy,  $G_{\text{tot}}(H_{\text{tot}} - T^*S)$ : -886.044439 hartrees

Optimized Geometry:

| Center<br>Number | Atomic<br>Number | Atomic<br>Type | Coordinates (Angstroms) |          |          |
|------------------|------------------|----------------|-------------------------|----------|----------|
|                  |                  |                | X                       | Y        | Z        |
| 1                | 6                | 0              | -4.335200               | 0.978100 | 0.622600 |
| 2                | 6                | 0              | -3.905600               | 0.812500 | 2.081200 |
| 3                | 6                | 0              | -5.102200               | 1.085300 | 3.000700 |

|    |   |   |            |           |           |
|----|---|---|------------|-----------|-----------|
| 4  | 6 | 0 | -5.702500  | 2.495400  | 2.772700  |
| 5  | 6 | 0 | -5.901200  | 2.847600  | 1.286300  |
| 6  | 6 | 0 | -4.812000  | 2.402300  | 0.308000  |
| 7  | 6 | 0 | -3.659500  | 3.401200  | 0.360300  |
| 8  | 6 | 0 | -4.799800  | 0.867900  | 4.474700  |
| 9  | 6 | 0 | -7.150700  | 2.502200  | 3.208600  |
| 10 | 6 | 0 | -7.924400  | 2.271500  | 2.070300  |
| 11 | 6 | 0 | -7.769400  | 2.531600  | 4.450300  |
| 12 | 6 | 0 | -9.160300  | 2.370800  | 4.514700  |
| 13 | 6 | 0 | -9.913900  | 2.153100  | 3.364500  |
| 14 | 6 | 0 | -9.292200  | 2.093000  | 2.107100  |
| 15 | 8 | 0 | -7.094900  | 2.698200  | 5.616300  |
| 16 | 8 | 0 | -7.157200  | 2.228100  | 0.933600  |
| 17 | 8 | 0 | -5.319900  | 2.471300  | -1.012200 |
| 18 | 6 | 0 | -11.411600 | 2.002300  | 3.454800  |
| 19 | 6 | 0 | -5.578300  | -0.224100 | 5.153900  |
| 20 | 6 | 0 | -3.903500  | 1.618100  | 5.124600  |
| 21 | 1 | 0 | -3.523800  | 0.730100  | -0.068700 |
| 22 | 1 | 0 | -5.162000  | 0.286900  | 0.411700  |
| 23 | 1 | 0 | -3.076100  | 1.487200  | 2.325500  |
| 24 | 1 | 0 | -3.538700  | -0.203900 | 2.259300  |
| 25 | 1 | 0 | -5.885000  | 0.370600  | 2.711900  |
| 26 | 1 | 0 | -5.081000  | 3.252800  | 3.262100  |
| 27 | 1 | 0 | -6.046900  | 3.933500  | 1.190500  |
| 28 | 1 | 0 | -2.861400  | 3.075300  | -0.311100 |
| 29 | 1 | 0 | -4.011800  | 4.379700  | 0.025800  |
| 30 | 1 | 0 | -3.248900  | 3.501900  | 1.368600  |
| 31 | 1 | 0 | -9.634300  | 2.409400  | 5.489800  |
| 32 | 1 | 0 | -9.860200  | 1.922400  | 1.199400  |
| 33 | 1 | 0 | -6.142200  | 2.632100  | 5.452300  |
| 34 | 1 | 0 | -6.185000  | 2.040200  | -1.003800 |
| 35 | 1 | 0 | -11.729100 | 1.795200  | 4.478600  |
| 36 | 1 | 0 | -11.912700 | 2.918300  | 3.126400  |
| 37 | 1 | 0 | -11.763800 | 1.189300  | 2.813900  |
| 38 | 1 | 0 | -5.393400  | -1.183400 | 4.657400  |
| 39 | 1 | 0 | -5.315500  | -0.318800 | 6.209500  |
| 40 | 1 | 0 | -6.653500  | -0.024800 | 5.075000  |
| 41 | 1 | 0 | -3.683700  | 1.453700  | 6.175100  |
| 42 | 1 | 0 | -3.341000  | 2.402200  | 4.623200  |

---

SCF GIAO Magnetic shielding tensor (ppm):

|              |   |             |          |                   |          |
|--------------|---|-------------|----------|-------------------|----------|
| 1            | C | Isotropic = | 147.7946 | Anisotropy =      | 23.8393  |
| XX=          |   |             | 137.4911 | YX=               | -2.1634  |
|              |   |             |          | ZX=               | 3.5091   |
| XY=          |   |             | -9.3983  | YY=               | 158.2548 |
|              |   |             |          | ZY=               | 5.1477   |
| XZ=          |   |             | -2.1026  | YZ=               | 11.4894  |
|              |   |             |          | <td>147.6380</td> | 147.6380 |
| Eigenvalues: |   |             | 135.2142 | 144.4822          | 163.6875 |
| 2            | C | Isotropic = | 153.6816 | Anisotropy =      | 23.9990  |
| XX=          |   |             | 160.6428 | YX=               | -9.2204  |
|              |   |             |          | ZX=               | 5.0834   |

|              |             |          |              |     |          |          |  |
|--------------|-------------|----------|--------------|-----|----------|----------|--|
| XY=          | -3.4302     | YY=      | 159.9996     | ZY= | -5.8538  |          |  |
| XZ=          | 6.3517      | YZ=      | -9.3676      | ZZ= | 140.4024 |          |  |
| Eigenvalues: | 137.2561    |          | 154.1078     |     | 169.6809 |          |  |
| 3 C          | Isotropic = | 135.4618 | Anisotropy = |     |          | 11.6756  |  |
| XX=          | 141.2334    | YX=      | -3.8478      | ZX= | -0.5567  |          |  |
| XY=          | 8.9823      | YY=      | 139.8462     | ZY= | -2.8036  |          |  |
| XZ=          | 6.4617      | YZ=      | -7.3269      | ZZ= | 125.3058 |          |  |
| Eigenvalues: | 123.0047    |          | 140.1352     |     | 143.2455 |          |  |
| 4 C          | Isotropic = | 134.4419 | Anisotropy = |     |          | 30.0952  |  |
| XX=          | 124.1812    | YX=      | 4.5957       | ZX= | 2.3902   |          |  |
| XY=          | 1.2142      | YY=      | 151.7798     | ZY= | -3.1581  |          |  |
| XZ=          | 8.8468      | YZ=      | 18.0656      | ZZ= | 127.3647 |          |  |
| Eigenvalues: | 119.7577    |          | 129.0626     |     | 154.5053 |          |  |
| 5 C          | Isotropic = | 95.3805  | Anisotropy = |     |          | 58.0435  |  |
| XX=          | 118.8134    | YX=      | 7.6187       | ZX= | -19.9392 |          |  |
| XY=          | 4.2612      | YY=      | 87.3125      | ZY= | -27.8672 |          |  |
| XZ=          | -26.6754    | YZ=      | -11.2965     | ZZ= | 80.0157  |          |  |
| Eigenvalues: | 59.7821     |          | 92.2833      |     | 134.0762 |          |  |
| 6 C          | Isotropic = | 115.9626 | Anisotropy = |     |          | 48.4884  |  |
| XX=          | 97.3456     | YX=      | -1.1849      | ZX= | -0.5468  |          |  |
| XY=          | -12.0995    | YY=      | 144.9634     | ZY= | -8.4603  |          |  |
| XZ=          | 0.2529      | YZ=      | -12.0731     | ZZ= | 105.5789 |          |  |
| Eigenvalues: | 96.1165     |          | 103.4832     |     | 148.2882 |          |  |
| 7 C          | Isotropic = | 162.3200 | Anisotropy = |     |          | 40.1642  |  |
| XX=          | 170.9539    | YX=      | 6.3254       | ZX= | -16.4951 |          |  |
| XY=          | 5.9022      | YY=      | 145.1167     | ZY= | -0.8837  |          |  |
| XZ=          | -18.7018    | YZ=      | -1.0559      | ZZ= | 170.8893 |          |  |
| Eigenvalues: | 143.2515    |          | 154.6123     |     | 189.0961 |          |  |
| 8 C          | Isotropic = | 17.3031  | Anisotropy = |     |          | 211.8557 |  |
| XX=          | 46.5089     | YX=      | 79.8599      | ZX= | 100.2711 |          |  |
| XY=          | 82.1188     | YY=      | -31.7469     | ZY= | -6.7871  |          |  |
| XZ=          | 96.1881     | YZ=      | 1.0829       | ZZ= | 37.1474  |          |  |
| Eigenvalues: | -108.8298   |          | 2.1989       |     | 158.5403 |          |  |
| 9 C          | Isotropic = | 67.8916  | Anisotropy = |     |          | 106.9999 |  |
| XX=          | 23.8729     | YX=      | -1.4756      | ZX= | 8.5404   |          |  |
| XY=          | -15.9881    | YY=      | 60.7777      | ZY= | 37.8787  |          |  |
| XZ=          | 15.4709     | YZ=      | 40.7282      | ZZ= | 119.0240 |          |  |
| Eigenvalues: | 16.4072     |          | 48.0426      |     | 139.2248 |          |  |
| 10 C         | Isotropic = | 21.5991  | Anisotropy = |     |          | 109.6759 |  |
| XX=          | -30.5417    | YX=      | 34.4098      | ZX= | -5.5523  |          |  |
| XY=          | 44.4481     | YY=      | 12.1454      | ZY= | 35.8715  |          |  |
| XZ=          | -16.7739    | YZ=      | 25.5122      | ZZ= | 83.1935  |          |  |
| Eigenvalues: | -58.6928    |          | 28.7736      |     | 94.7164  |          |  |
| 11 C         | Isotropic = | 28.4147  | Anisotropy = |     |          | 135.0790 |  |
| XX=          | 14.9521     | YX=      | -6.3432      | ZX= | 9.9553   |          |  |
| XY=          | -0.4144     | YY=      | -25.2141     | ZY= | 60.8580  |          |  |
| XZ=          | 6.5692      | YZ=      | 52.8517      | ZZ= | 95.5062  |          |  |
| Eigenvalues: | -48.3815    |          | 15.1583      |     | 118.4674 |          |  |
| 12 C         | Isotropic = | 73.8265  | Anisotropy = |     |          | 116.6887 |  |
| XX=          | 20.8820     | YX=      | 30.9184      | ZX= | -4.2809  |          |  |
| XY=          | 42.1476     | YY=      | 60.6812      | ZY= | 37.3506  |          |  |
| XZ=          | -5.9101     | YZ=      | 26.4465      | ZZ= | 139.9164 |          |  |



|              |             |          |              |          |          |
|--------------|-------------|----------|--------------|----------|----------|
| Eigenvalues: | -3.9450     | 73.8056  | 151.6190     |          |          |
| 13 C         | Isotropic = | 40.9411  | Anisotropy = | 194.2865 |          |
| XX=          | -42.1601    | YX=      | -15.1181     | ZX=      | 21.3010  |
| XY=          | -17.8614    | YY=      | 29.3688      | ZY=      | 66.6505  |
| XZ=          | 28.9436     | YZ=      | 70.7790      | ZZ=      | 135.6146 |
| Eigenvalues: | -56.1280    | 8.4858   | 170.4655     |          |          |
| 14 C         | Isotropic = | 81.2125  | Anisotropy = | 122.5971 |          |
| XX=          | 73.9830     | YX=      | 9.5172       | ZX=      | 2.8571   |
| XY=          | -7.5666     | YY=      | 32.7681      | ZY=      | 60.8103  |
| XZ=          | 4.3480      | YZ=      | 55.2621      | ZZ=      | 136.8864 |
| Eigenvalues: | 6.8585      | 73.8351  | 162.9439     |          |          |
| 15 O         | Isotropic = | 203.2016 | Anisotropy = | 76.2474  |          |
| XX=          | 148.1229    | YX=      | 13.6720      | ZX=      | 0.0256   |
| XY=          | 6.0790      | YY=      | 210.3827     | ZY=      | 10.9373  |
| XZ=          | 23.5218     | YZ=      | -29.7993     | ZZ=      | 251.0992 |
| Eigenvalues: | 144.9696    | 210.6021 | 254.0332     |          |          |
| 16 O         | Isotropic = | 193.1758 | Anisotropy = | 104.6400 |          |
| XX=          | 225.0035    | YX=      | -54.5162     | ZX=      | 34.4980  |
| XY=          | -48.1269    | YY=      | 159.9280     | ZY=      | 36.5025  |
| XZ=          | 26.4214     | YZ=      | -30.8425     | ZZ=      | 194.5959 |
| Eigenvalues: | 126.9897    | 189.6019 | 262.9358     |          |          |
| 17 O         | Isotropic = | 257.0632 | Anisotropy = | 53.2051  |          |
| XX=          | 236.8251    | YX=      | 14.3043      | ZX=      | -19.6587 |
| XY=          | 7.8377      | YY=      | 282.7798     | ZY=      | -11.8610 |
| XZ=          | -28.6909    | YZ=      | -8.8657      | ZZ=      | 251.5846 |
| Eigenvalues: | 218.8035    | 259.8528 | 292.5333     |          |          |
| 18 C         | Isotropic = | 163.7609 | Anisotropy = | 41.4816  |          |
| XX=          | 185.8938    | YX=      | 7.1304       | ZX=      | -10.1712 |
| XY=          | 12.8805     | YY=      | 157.8998     | ZY=      | -9.5690  |
| XZ=          | -5.8368     | YZ=      | -6.0240      | ZZ=      | 147.4892 |
| Eigenvalues: | 143.1606    | 156.7068 | 191.4153     |          |          |
| 19 C         | Isotropic = | 158.0418 | Anisotropy = | 42.4420  |          |
| XX=          | 158.3359    | YX=      | -15.2407     | ZX=      | -17.0571 |
| XY=          | -12.0332    | YY=      | 160.7164     | ZY=      | 9.2358   |
| XZ=          | -18.6129    | YZ=      | 12.2630      | ZZ=      | 155.0729 |
| Eigenvalues: | 138.6801    | 149.1087 | 186.3364     |          |          |
| 20 C         | Isotropic = | 72.5081  | Anisotropy = | 130.2649 |          |
| XX=          | 92.5426     | YX=      | 75.2917      | ZX=      | 47.6763  |
| XY=          | 71.5125     | YY=      | 22.0723      | ZY=      | -16.6159 |
| XZ=          | 48.5968     | YZ=      | -18.9510     | ZZ=      | 102.9094 |
| Eigenvalues: | -36.4851    | 94.6581  | 159.3514     |          |          |
| 21 H         | Isotropic = | 30.0618  | Anisotropy = | 8.4269   |          |
| XX=          | 33.3182     | YX=      | -1.8787      | ZX=      | 3.4555   |
| XY=          | -1.8416     | YY=      | 28.2912      | ZY=      | 0.3698   |
| XZ=          | 3.9367      | YZ=      | -0.1370      | ZZ=      | 28.5760  |
| Eigenvalues: | 26.0539     | 28.4518  | 35.6798      |          |          |
| 22 H         | Isotropic = | 30.1232  | Anisotropy = | 5.5432   |          |
| XX=          | 27.9654     | YX=      | -0.7056      | ZX=      | -0.4297  |
| XY=          | 0.5088      | YY=      | 29.0693      | ZY=      | -1.0039  |
| XZ=          | 0.3465      | YZ=      | -2.0272      | ZZ=      | 33.3351  |
| Eigenvalues: | 27.9476     | 28.6034  | 33.8187      |          |          |
| 23 H         | Isotropic = | 30.3843  | Anisotropy = | 5.6469   |          |

|              |             |         |              |     |         |         |  |
|--------------|-------------|---------|--------------|-----|---------|---------|--|
| XX=          | 31.4831     | YX=     | 1.1193       | ZX= | -2.4294 |         |  |
| XY=          | 1.8426      | YY=     | 32.1326      | ZY= | -1.8278 |         |  |
| XZ=          | -1.4454     | YZ=     | -1.0039      | ZZ= | 27.5373 |         |  |
| Eigenvalues: | 26.6293     |         | 30.3748      |     | 34.1489 |         |  |
| 24 H         | Isotropic = | 30.1583 | Anisotropy = |     |         | 9.1936  |  |
| XX=          | 29.4865     | YX=     | 0.2942       | ZX= | 3.6620  |         |  |
| XY=          | 0.9344      | YY=     | 30.8970      | ZY= | 4.6826  |         |  |
| XZ=          | 4.0911      | YZ=     | 3.8403       | ZZ= | 30.0912 |         |  |
| Eigenvalues: | 24.6665     |         | 29.5209      |     | 36.2873 |         |  |
| 25 H         | Isotropic = | 30.0490 | Anisotropy = |     |         | 3.6932  |  |
| XX=          | 30.6377     | YX=     | -1.5216      | ZX= | -2.3433 |         |  |
| XY=          | -0.2699     | YY=     | 29.8435      | ZY= | 0.7256  |         |  |
| XZ=          | 0.2118      | YZ=     | 2.7336       | ZZ= | 29.6658 |         |  |
| Eigenvalues: | 28.0111     |         | 29.6248      |     | 32.5111 |         |  |
| 26 H         | Isotropic = | 28.7747 | Anisotropy = |     |         | 4.3624  |  |
| XX=          | 27.6366     | YX=     | -0.1081      | ZX= | 0.1224  |         |  |
| XY=          | -1.7304     | YY=     | 29.4525      | ZY= | -2.1764 |         |  |
| XZ=          | -1.1195     | YZ=     | -2.4432      | ZZ= | 29.2350 |         |  |
| Eigenvalues: | 26.2870     |         | 28.3542      |     | 31.6830 |         |  |
| 27 H         | Isotropic = | 27.6120 | Anisotropy = |     |         | 5.7526  |  |
| XX=          | 27.4320     | YX=     | 1.1300       | ZX= | -1.8107 |         |  |
| XY=          | -0.7280     | YY=     | 26.3794      | ZY= | 0.5678  |         |  |
| XZ=          | -3.8378     | YZ=     | 2.6847       | ZZ= | 29.0245 |         |  |
| Eigenvalues: | 24.5096     |         | 26.8793      |     | 31.4470 |         |  |
| 28 H         | Isotropic = | 30.6299 | Anisotropy = |     |         | 9.8871  |  |
| XX=          | 37.0015     | YX=     | -0.9504      | ZX= | -0.4734 |         |  |
| XY=          | -0.3644     | YY=     | 26.9370      | ZY= | 0.3773  |         |  |
| XZ=          | -2.0572     | YZ=     | 0.1853       | ZZ= | 27.9513 |         |  |
| Eigenvalues: | 26.8522     |         | 27.8162      |     | 37.2213 |         |  |
| 29 H         | Isotropic = | 30.6169 | Anisotropy = |     |         | 9.0566  |  |
| XX=          | 28.8010     | YX=     | -0.7805      | ZX= | -2.3344 |         |  |
| XY=          | -0.5269     | YY=     | 29.0337      | ZY= | 3.0878  |         |  |
| XZ=          | -2.1836     | YZ=     | 4.2948       | ZZ= | 34.0159 |         |  |
| Eigenvalues: | 26.8952     |         | 28.3009      |     | 36.6546 |         |  |
| 30 H         | Isotropic = | 30.2951 | Anisotropy = |     |         | 6.6388  |  |
| XX=          | 28.6818     | YX=     | -0.0239      | ZX= | -3.2891 |         |  |
| XY=          | -0.5027     | YY=     | 32.0944      | ZY= | -2.3992 |         |  |
| XZ=          | -3.3643     | YZ=     | -3.2828      | ZZ= | 30.1091 |         |  |
| Eigenvalues: | 25.3520     |         | 30.8123      |     | 34.7210 |         |  |
| 31 H         | Isotropic = | 25.2290 | Anisotropy = |     |         | 6.7272  |  |
| XX=          | 27.0765     | YX=     | 2.3195       | ZX= | -0.9989 |         |  |
| XY=          | 2.5388      | YY=     | 26.1605      | ZY= | -2.2374 |         |  |
| XZ=          | -0.7397     | YZ=     | -2.2215      | ZZ= | 22.4502 |         |  |
| Eigenvalues: | 21.3919     |         | 24.5814      |     | 29.7139 |         |  |
| 32 H         | Isotropic = | 25.3466 | Anisotropy = |     |         | 7.3788  |  |
| XX=          | 30.0860     | YX=     | 0.4617       | ZX= | -0.7744 |         |  |
| XY=          | 0.9596      | YY=     | 24.1613      | ZY= | -1.3087 |         |  |
| XZ=          | -0.6698     | YZ=     | -1.5582      | ZZ= | 21.7926 |         |  |
| Eigenvalues: | 21.1035     |         | 24.6705      |     | 30.2659 |         |  |
| 33 H         | Isotropic = | 26.5190 | Anisotropy = |     |         | 16.8640 |  |
| XX=          | 35.3683     | YX=     | 4.1308       | ZX= | 3.3218  |         |  |
| XY=          | 5.9215      | YY=     | 26.2164      | ZY= | -2.8137 |         |  |

|              |             |         |              |         |         |  |
|--------------|-------------|---------|--------------|---------|---------|--|
| XZ=          | 2.0940      | YZ=     | -0.4198      | ZZ=     | 17.9724 |  |
| Eigenvalues: | 16.8810     |         | 24.9144      |         | 37.7617 |  |
| 34 H         | Isotropic = | 30.0323 | Anisotropy = | 15.8805 |         |  |
| XX=          | 33.2796     | YX=     | 1.9305       | ZX=     | -6.1675 |  |
| XY=          | 2.9587      | YY=     | 31.3969      | ZY=     | -6.9024 |  |
| XZ=          | -6.4338     | YZ=     | -7.0464      | ZZ=     | 25.4203 |  |
| Eigenvalues: | 19.5338     |         | 29.9437      |         | 40.6193 |  |
| 35 H         | Isotropic = | 29.7988 | Anisotropy = | 7.9055  |         |  |
| XX=          | 34.1445     | YX=     | -3.1925      | ZX=     | -0.9384 |  |
| XY=          | -0.9157     | YY=     | 29.9155      | ZY=     | -1.2923 |  |
| XZ=          | -1.9837     | YZ=     | -1.0117      | ZZ=     | 25.3364 |  |
| Eigenvalues: | 24.6627     |         | 29.6645      |         | 35.0691 |  |
| 36 H         | Isotropic = | 29.3083 | Anisotropy = | 9.0487  |         |  |
| XX=          | 30.5442     | YX=     | 3.5675       | ZX=     | 1.4005  |  |
| XY=          | 3.4602      | YY=     | 30.5993      | ZY=     | 2.1526  |  |
| XZ=          | 2.5963      | YZ=     | 3.1041       | ZZ=     | 26.7815 |  |
| Eigenvalues: | 25.4289     |         | 27.1553      |         | 35.3408 |  |
| 37 H         | Isotropic = | 29.5037 | Anisotropy = | 8.0060  |         |  |
| XX=          | 30.0053     | YX=     | 1.8414       | ZX=     | -2.3558 |  |
| XY=          | 0.1683      | YY=     | 27.6784      | ZY=     | -3.9313 |  |
| XZ=          | -1.7585     | YZ=     | -4.5573      | ZZ=     | 30.8273 |  |
| Eigenvalues: | 24.7001     |         | 28.9699      |         | 34.8410 |  |
| 38 H         | Isotropic = | 30.0314 | Anisotropy = | 7.9515  |         |  |
| XX=          | 27.3157     | YX=     | -0.7705      | ZX=     | 0.7132  |  |
| XY=          | -1.1013     | YY=     | 28.4526      | ZY=     | 2.7581  |  |
| XZ=          | 1.1644      | YZ=     | 2.3887       | ZZ=     | 34.3259 |  |
| Eigenvalues: | 26.1729     |         | 28.5889      |         | 35.3324 |  |
| 39 H         | Isotropic = | 29.9725 | Anisotropy = | 8.7928  |         |  |
| XX=          | 28.0067     | YX=     | -3.5755      | ZX=     | -0.7456 |  |
| XY=          | -2.0176     | YY=     | 34.5121      | ZY=     | -0.1252 |  |
| XZ=          | -1.3374     | YZ=     | 2.6557       | ZZ=     | 27.3987 |  |
| Eigenvalues: | 26.5087     |         | 27.5744      |         | 35.8344 |  |
| 40 H         | Isotropic = | 29.9753 | Anisotropy = | 5.6212  |         |  |
| XX=          | 32.4029     | YX=     | 2.3052       | ZX=     | -1.3418 |  |
| XY=          | 1.7249      | YY=     | 29.9960      | ZY=     | 2.3203  |  |
| XZ=          | -0.2189     | YZ=     | 3.9239       | ZZ=     | 27.5268 |  |
| Eigenvalues: | 24.9664     |         | 31.2367      |         | 33.7227 |  |
| 41 H         | Isotropic = | 26.3582 | Anisotropy = | 5.4842  |         |  |
| XX=          | 25.3649     | YX=     | 3.0799       | ZX=     | -1.1895 |  |
| XY=          | 1.1251      | YY=     | 27.4084      | ZY=     | -1.2237 |  |
| XZ=          | -0.0132     | YZ=     | -3.1383      | ZZ=     | 26.3014 |  |
| Eigenvalues: | 23.7819     |         | 25.2784      |         | 30.0144 |  |
| 42 H         | Isotropic = | 26.4264 | Anisotropy = | 8.0883  |         |  |
| XX=          | 25.1061     | YX=     | 0.6565       | ZX=     | 0.2749  |  |
| XY=          | 3.4699      | YY=     | 28.3097      | ZY=     | -5.9680 |  |
| XZ=          | -0.8763     | YZ=     | -2.1130      | ZZ=     | 25.8635 |  |
| Eigenvalues: | 22.4383     |         | 25.0223      |         | 31.8186 |  |

Number of frequencies: 120

harmonic frequencies in  $\text{cm}^{-1}$ , reduced masses in amu,

force constants in mDyne/A, and

normal modes in cartesian coordinates: 120

IR intensities in  $\text{km/mol}$

vibration # 1 2 3 4 5 6

-----

frequencies 54.26 75.85 93.00 98.14 109.60 127.02

intensities 0.35 0.90 1.23 0.15 0.06 4.68

reduc. mass 1.37 0.91 0.36 0.72 1.80 1.64

force const 0.00 0.00 0.00 0.00 0.01 0.02

vibration # 7 8 9 10 11 12

-----

frequencies 172.62 200.93 215.94 235.73 253.27 263.12

intensities 1.13 2.01 0.55 0.39 2.65 3.48

reduc. mass 0.83 0.66 1.20 0.61 0.79 0.96

force const 0.01 0.02 0.03 0.02 0.03 0.04

vibration # 13 14 15 16 17 18

-----

frequencies 276.67 293.67 303.59 304.57 314.29 345.56

intensities 3.13 0.27 1.05 2.17 5.03 6.38

reduc. mass 1.23 0.17 0.79 0.29 0.64 0.85

force const 0.06 0.01 0.04 0.02 0.04 0.06

vibration # 19 20 21 22 23 24

-----

|             |        |        |        |        |        |        |
|-------------|--------|--------|--------|--------|--------|--------|
| frequencies | 373.60 | 403.90 | 420.98 | 459.82 | 491.96 | 504.86 |
| intensities | 1.61   | 5.65   | 4.26   | 4.61   | 10.50  | 3.01   |
| reduc. mass | 1.00   | 0.86   | 0.65   | 0.61   | 1.34   | 0.59   |
| force const | 0.08   | 0.08   | 0.07   | 0.08   | 0.19   | 0.09   |

vibration #      25    26    27    28    29    30

-----

|             |        |        |        |        |        |        |
|-------------|--------|--------|--------|--------|--------|--------|
| frequencies | 516.17 | 528.07 | 547.94 | 567.64 | 598.68 | 622.98 |
| intensities | 9.35   | 10.55  | 4.95   | 11.20  | 26.43  | 95.52  |
| reduc. mass | 0.76   | 1.21   | 0.63   | 0.58   | 1.96   | 0.86   |
| force const | 0.12   | 0.20   | 0.11   | 0.11   | 0.41   | 0.20   |

vibration #      31    32    33    34    35    36

-----

|             |        |        |        |        |        |        |
|-------------|--------|--------|--------|--------|--------|--------|
| frequencies | 647.89 | 663.59 | 699.34 | 712.26 | 718.09 | 738.90 |
| intensities | 95.51  | 3.01   | 4.44   | 15.63  | 0.64   | 4.72   |
| reduc. mass | 0.74   | 1.08   | 0.94   | 0.99   | 0.34   | 0.79   |
| force const | 0.18   | 0.28   | 0.27   | 0.29   | 0.10   | 0.25   |

vibration #      37    38    39    40    41    42

-----

|             |        |        |        |        |        |        |
|-------------|--------|--------|--------|--------|--------|--------|
| frequencies | 752.88 | 800.84 | 836.36 | 847.61 | 858.68 | 926.11 |
| intensities | 17.65  | 2.49   | 2.00   | 2.77   | 7.17   | 0.30   |
| reduc. mass | 0.74   | 1.27   | 2.11   | 0.78   | 0.70   | 0.72   |
| force const | 0.25   | 0.48   | 0.87   | 0.33   | 0.30   | 0.37   |

vibration #      43    44    45    46    47    48

-----

|             |        |        |        |        |         |         |
|-------------|--------|--------|--------|--------|---------|---------|
| frequencies | 933.55 | 941.68 | 960.11 | 988.76 | 1014.54 | 1022.53 |
|-------------|--------|--------|--------|--------|---------|---------|

|             |      |      |       |      |      |       |
|-------------|------|------|-------|------|------|-------|
| intensities | 1.99 | 4.23 | 24.38 | 3.04 | 1.60 | 10.62 |
| reduc. mass | 0.53 | 0.60 | 0.34  | 0.26 | 0.26 | 0.24  |
| force const | 0.27 | 0.31 | 0.18  | 0.15 | 0.16 | 0.15  |

vibration #      49    50    51    52    53    54

-----

|             |         |         |         |         |         |         |
|-------------|---------|---------|---------|---------|---------|---------|
| frequencies | 1031.06 | 1038.26 | 1051.15 | 1055.10 | 1064.24 | 1088.86 |
| intensities | 29.69   | 14.58   | 9.89    | 2.97    | 45.97   | 40.06   |
| reduc. mass | 0.44    | 0.33    | 0.26    | 0.26    | 0.69    | 0.26    |
| force const | 0.28    | 0.21    | 0.17    | 0.17    | 0.46    | 0.18    |

vibration #      55    56    57    58    59    60

-----

|             |         |         |         |         |         |         |
|-------------|---------|---------|---------|---------|---------|---------|
| frequencies | 1098.59 | 1131.62 | 1134.33 | 1138.91 | 1161.89 | 1223.93 |
| intensities | 4.90    | 25.02   | 12.63   | 40.28   | 27.44   | 78.91   |
| reduc. mass | 0.52    | 0.46    | 0.60    | 0.67    | 0.74    | 0.68    |
| force const | 0.37    | 0.34    | 0.45    | 0.51    | 0.58    | 0.60    |

vibration #      61    62    63    64    65    66

-----

|             |         |         |         |         |         |         |
|-------------|---------|---------|---------|---------|---------|---------|
| frequencies | 1243.76 | 1251.13 | 1256.11 | 1294.51 | 1306.54 | 1307.22 |
| intensities | 13.36   | 102.87  | 22.29   | 23.24   | 135.13  | 108.74  |
| reduc. mass | 0.24    | 0.45    | 0.30    | 1.24    | 0.62    | 0.55    |
| force const | 0.22    | 0.42    | 0.28    | 1.22    | 0.62    | 0.55    |

vibration #      67    68    69    70    71    72

-----

|             |         |         |         |         |         |         |
|-------------|---------|---------|---------|---------|---------|---------|
| frequencies | 1347.24 | 1378.82 | 1402.27 | 1409.40 | 1435.42 | 1473.79 |
| intensities | 62.99   | 255.81  | 260.08  | 72.52   | 51.91   | 115.10  |

|             |      |      |      |      |      |      |
|-------------|------|------|------|------|------|------|
| reduc. mass | 0.69 | 0.57 | 0.35 | 0.62 | 0.63 | 1.73 |
| force const | 0.73 | 0.64 | 0.40 | 0.73 | 0.77 | 2.22 |

vibration #      73    74    75    76    77    78

-----

|             |         |         |         |         |         |         |
|-------------|---------|---------|---------|---------|---------|---------|
| frequencies | 1494.69 | 1507.18 | 1510.48 | 1519.73 | 1521.90 | 1545.58 |
| intensities | 7.99    | 92.64   | 14.37   | 118.11  | 79.50   | 5.33    |
| reduc. mass | 0.50    | 0.55    | 1.02    | 0.79    | 0.56    | 2.02    |
| force const | 0.66    | 0.73    | 1.37    | 1.07    | 0.77    | 2.85    |

vibration #      79    80    81    82    83    84

-----

|             |         |         |         |         |         |         |
|-------------|---------|---------|---------|---------|---------|---------|
| frequencies | 1562.31 | 1571.41 | 1592.22 | 1624.92 | 1634.43 | 1640.60 |
| intensities | 63.51   | 20.18   | 7.40    | 22.41   | 19.67   | 19.98   |
| reduc. mass | 0.52    | 0.45    | 0.42    | 0.61    | 0.46    | 0.33    |
| force const | 0.74    | 0.66    | 0.63    | 0.95    | 0.72    | 0.52    |

vibration #      85    86    87    88    89    90

-----

|             |         |         |         |         |         |         |
|-------------|---------|---------|---------|---------|---------|---------|
| frequencies | 1651.00 | 1655.93 | 1659.77 | 1660.50 | 1663.69 | 1665.02 |
| intensities | 42.91   | 31.69   | 36.92   | 28.39   | 123.39  | 14.18   |
| reduc. mass | 0.19    | 0.23    | 0.15    | 0.22    | 0.31    | 0.24    |
| force const | 0.31    | 0.37    | 0.25    | 0.36    | 0.51    | 0.40    |

vibration #      91    92    93    94    95    96

-----

|             |         |         |         |         |         |         |
|-------------|---------|---------|---------|---------|---------|---------|
| frequencies | 1668.03 | 1670.73 | 1672.71 | 1686.02 | 1690.73 | 1802.79 |
| intensities | 11.79   | 6.31    | 20.24   | 42.88   | 64.07   | 842.11  |
| reduc. mass | 0.25    | 0.13    | 0.24    | 0.38    | 0.24    | 1.60    |

force const 0.41 0.21 0.39 0.64 0.40 3.06

vibration # 97 98 99 100 101 102

-----

frequencies 1832.60 1888.91 3019.69 3034.42 3052.40 3060.15

intensities 452.88 17.34 295.46 334.35 403.69 673.14

reduc. mass 1.43 0.87 0.32 0.30 0.49 0.43

force const 2.83 1.82 1.73 1.60 2.68 2.36

vibration # 103 104 105 106 107 108

-----

frequencies 3074.52 3077.21 3091.48 3097.78 3118.23 3124.07

intensities 386.23 145.44 865.66 3.23 460.44 482.63

reduc. mass 0.84 0.75 0.29 0.77 0.14 0.27

force const 4.67 4.19 1.63 4.35 0.80 1.57

vibration # 109 110 111 112 113 114

-----

frequencies 3125.82 3129.93 3136.16 3145.29 3147.71 3150.41

intensities 6.51 367.00 358.67 799.95 9.36 246.67

reduc. mass 0.17 0.12 0.46 0.22 0.34 0.20

force const 0.97 0.68 2.69 1.26 1.99 1.17

vibration # 115 116 117 118 119 120

-----

frequencies 3158.39 3172.98 3189.42 3199.17 3824.96 3842.72

intensities 346.72 651.65 31.85 409.32 80.30 19.01

reduc. mass 0.44 0.23 0.15 0.27 0.94 0.94

force const 2.57 1.35 0.87 1.62 8.07 8.15



Number of imaginary frequencies: 0

5. DFT calculation data for the 6-membered cyclic ether (**9**). Energies, optimized geometries, NMR shielding values and IR frequencies from calculations performed at the mPW1PW91/6-311+G(2d,p)//M06-2X-D3/6-31G(d,p) level.

Conformation 1

Boltzmann Population = 47.0% (relative energy = 0.03 kcal/mol)

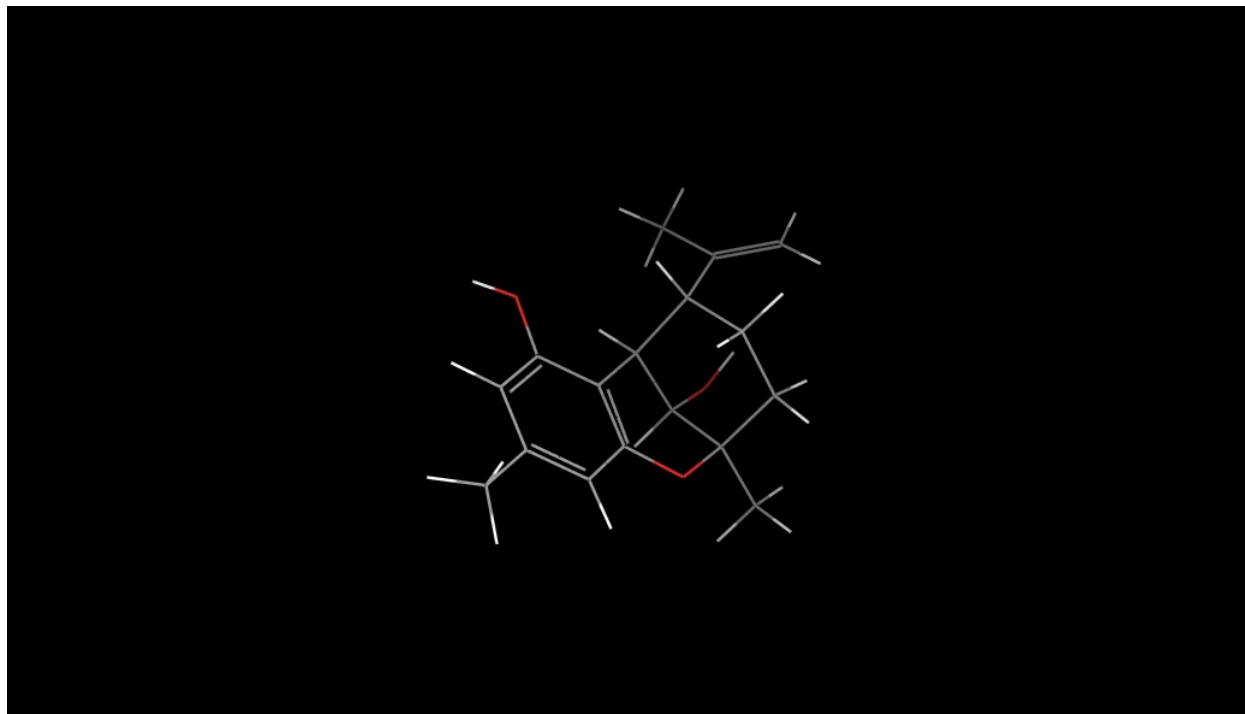

Geometries and Energy Method: M06-2X-D3/6-31G(d,p)

NMR Method: mPW1PW91/6-311+G(2d,p)

Thermodynamic properties for P = 1.00 atm, calculated at 1 temperatures

T = 298.15 K, P = 1.00 atm

Total internal energy, Utot(SCFE + ZPE + U): -885.988043 hartrees

Total enthalpy, Htot (Utot + pV): -885.987099 hartrees

Total Gibbs free energy, Gtot (Htot - T\*S): -886.047760 hartrees

Geometry Optimization:

| Center<br>Number | Atomic<br>Number | Atomic<br>Type | Coordinates (Angstroms) |   |   |
|------------------|------------------|----------------|-------------------------|---|---|
|                  |                  |                | X                       | Y | Z |
| -----            |                  |                |                         |   |   |

|    |   |   |           |           |          |
|----|---|---|-----------|-----------|----------|
| 1  | 6 | 0 | -1.414200 | -1.941000 | 4.789100 |
| 2  | 6 | 0 | -1.081600 | -1.863400 | 3.292700 |
| 3  | 6 | 0 | -2.282000 | -1.451300 | 2.426500 |
| 4  | 6 | 0 | -2.929000 | -0.166200 | 3.024200 |
| 5  | 6 | 0 | -3.363700 | -0.371500 | 4.478400 |
| 6  | 6 | 0 | -2.113000 | -0.680400 | 5.320800 |
| 7  | 6 | 0 | -2.462000 | -0.822600 | 6.791700 |
| 8  | 6 | 0 | -3.302600 | -2.546400 | 2.154500 |
| 9  | 6 | 0 | -1.933900 | 0.963000  | 3.017300 |
| 10 | 6 | 0 | -1.131500 | 1.200100  | 4.133400 |
| 11 | 8 | 0 | -1.200200 | 0.436200  | 5.256900 |
| 12 | 6 | 0 | -1.759800 | 1.786500  | 1.902000 |
| 13 | 6 | 0 | -0.838900 | 2.827700  | 1.904000 |
| 14 | 6 | 0 | -0.053500 | 3.060500  | 3.037100 |
| 15 | 6 | 0 | -0.203200 | 2.244400  | 4.151200 |
| 16 | 6 | 0 | 0.973700  | 4.164200  | 3.028600 |
| 17 | 8 | 0 | -2.540300 | 1.502000  | 0.817700 |
| 18 | 6 | 0 | -3.161200 | -3.814600 | 2.554100 |
| 19 | 6 | 0 | -4.515700 | -2.117200 | 1.365400 |
| 20 | 8 | 0 | -4.362800 | -1.353600 | 4.644600 |
| 21 | 1 | 0 | -0.499400 | -2.094200 | 5.370800 |
| 22 | 1 | 0 | -2.067100 | -2.797300 | 4.998200 |
| 23 | 1 | 0 | -0.288000 | -1.123800 | 3.149100 |
| 24 | 1 | 0 | -0.673100 | -2.817100 | 2.945100 |
| 25 | 1 | 0 | -1.906400 | -1.154200 | 1.436100 |
| 26 | 1 | 0 | -3.794800 | 0.125300  | 2.423800 |
| 27 | 1 | 0 | -3.799400 | 0.562800  | 4.853000 |
| 28 | 1 | 0 | -1.561100 | -1.034000 | 7.373900 |
| 29 | 1 | 0 | -2.903300 | 0.107600  | 7.158700 |
| 30 | 1 | 0 | -3.183100 | -1.630200 | 6.927000 |
| 31 | 1 | 0 | -0.727600 | 3.457400  | 1.023900 |
| 32 | 1 | 0 | 0.392200  | 2.393200  | 5.045600 |
| 33 | 1 | 0 | 1.916900  | 3.812900  | 2.597100 |
| 34 | 1 | 0 | 0.635300  | 5.015600  | 2.432800 |
| 35 | 1 | 0 | 1.183000  | 4.515700  | 4.041200 |
| 36 | 1 | 0 | -2.356500 | 2.142600  | 0.121700 |
| 37 | 1 | 0 | -3.904400 | -4.563000 | 2.296200 |
| 38 | 1 | 0 | -2.308800 | -4.156500 | 3.131200 |
| 39 | 1 | 0 | -5.214700 | -1.574800 | 2.010800 |
| 40 | 1 | 0 | -4.232900 | -1.440500 | 0.551700 |
| 41 | 1 | 0 | -5.037500 | -2.978400 | 0.943900 |
| 42 | 1 | 0 | -4.074500 | -2.171900 | 4.216700 |

SCF GIAO Magnetic shielding tensor (ppm):

|     |          |             |          |              |         |
|-----|----------|-------------|----------|--------------|---------|
| 1   | C        | Isotropic = | 155.2155 | Anisotropy = | 30.0358 |
| XX= | 146.2589 | YX=         | 4.9428   | ZX=          | -7.7085 |
| XY= | 3.3253   | YY=         | 156.2760 | ZY=          | -7.8550 |

|              |             |          |              |     |           |          |
|--------------|-------------|----------|--------------|-----|-----------|----------|
| XZ=          | -13.7477    | YZ=      | -13.5679     | ZZ= | 163.1117  |          |
| Eigenvalues: | 140.9552    |          | 149.4520     |     | 175.2394  |          |
| 2 C          | Isotropic = | 165.1065 | Anisotropy = |     |           | 13.9819  |
| XX=          | 156.5403    | YX=      | -0.5688      | ZX= | -2.4859   |          |
| XY=          | -1.2914     | YY=      | 174.1468     | ZY= | 2.3080    |          |
| XZ=          | 0.1010      | YZ=      | 0.5744       | ZZ= | 164.6325  |          |
| Eigenvalues: | 156.3390    |          | 164.5527     |     | 174.4278  |          |
| 3 C          | Isotropic = | 140.7393 | Anisotropy = |     |           | 21.2607  |
| XX=          | 151.7808    | YX=      | 9.9485       | ZX= | 13.0989   |          |
| XY=          | 3.9037      | YY=      | 138.6888     | ZY= | -2.0800   |          |
| XZ=          | -6.0748     | YZ=      | -5.0883      | ZZ= | 131.7482  |          |
| Eigenvalues: | 128.5575    |          | 138.7472     |     | 154.9131  |          |
| 4 C          | Isotropic = | 149.7882 | Anisotropy = |     |           | 19.7756  |
| XX=          | 150.5584    | YX=      | 2.1057       | ZX= | -1.4544   |          |
| XY=          | -3.2898     | YY=      | 137.7229     | ZY= | -8.1565   |          |
| XZ=          | 2.5591      | YZ=      | -5.5043      | ZZ= | 161.0832  |          |
| Eigenvalues: | 135.8600    |          | 150.5327     |     | 162.9719  |          |
| 5 C          | Isotropic = | 111.2472 | Anisotropy = |     |           | 45.9169  |
| XX=          | 141.2799    | YX=      | 8.4683       | ZX= | 4.7491    |          |
| XY=          | 0.8897      | YY=      | 102.1200     | ZY= | -3.3733   |          |
| XZ=          | -6.4301     | YZ=      | -2.5700      | ZZ= | 90.3417   |          |
| Eigenvalues: | 89.6330     |          | 102.2501     |     | 141.8585  |          |
| 6 C          | Isotropic = | 107.8425 | Anisotropy = |     |           | 63.8472  |
| XX=          | 146.9141    | YX=      | -0.8820      | ZX= | 12.1283   |          |
| XY=          | 8.6075      | YY=      | 84.4381      | ZY= | -4.8824   |          |
| XZ=          | 16.0231     | YZ=      | -6.9165      | ZZ= | 92.1753   |          |
| Eigenvalues: | 79.5646     |          | 93.5557      |     | 150.4073  |          |
| 7 C          | Isotropic = | 160.3740 | Anisotropy = |     |           | 41.9627  |
| XX=          | 147.7121    | YX=      | -8.3757      | ZX= | 0.2735    |          |
| XY=          | -8.0720     | YY=      | 177.3550     | ZY= | -19.1945  |          |
| XZ=          | -0.3347     | YZ=      | -15.5339     | ZZ= | 156.0550  |          |
| Eigenvalues: | 142.4042    |          | 150.3687     |     | 188.3492  |          |
| 8 C          | Isotropic = | 25.1790  | Anisotropy = |     |           | 197.2460 |
| XX=          | -17.0302    | YX=      | -50.9089     | ZX= | -23.5094  |          |
| XY=          | -49.9470    | YY=      | 32.8566      | ZY= | -113.7090 |          |
| XZ=          | -26.8121    | YZ=      | -102.7792    | ZZ= | 59.7105   |          |
| Eigenvalues: | -99.2268    |          | 18.0875      |     | 156.6763  |          |
| 9 C          | Isotropic = | 73.2697  | Anisotropy = |     |           | 127.9567 |
| XX=          | 26.9431     | YX=      | -0.3215      | ZX= | -23.9379  |          |
| XY=          | 2.0815      | YY=      | 40.2408      | ZY= | -20.3566  |          |
| XZ=          | -18.0377    | YZ=      | -14.4604     | ZZ= | 152.6252  |          |
| Eigenvalues: | 23.2789     |          | 37.9560      |     | 158.5742  |          |
| 10 C         | Isotropic = | 24.5134  | Anisotropy = |     |           | 139.0053 |
| XX=          | -12.5501    | YX=      | 38.2234      | ZX= | -14.4236  |          |
| XY=          | 45.1774     | YY=      | -24.5922     | ZY= | -18.0855  |          |
| XZ=          | -15.3210    | YZ=      | -21.9800     | ZZ= | 110.6825  |          |
| Eigenvalues: | -60.8818    |          | 17.2384      |     | 117.1836  |          |
| 11 O         | Isotropic = | 170.3620 | Anisotropy = |     |           | 68.4607  |
| XX=          | 123.1279    | YX=      | -2.1644      | ZX= | -18.1205  |          |
| XY=          | -30.2642    | YY=      | 181.8887     | ZY= | -4.1087   |          |
| XZ=          | -13.5753    | YZ=      | -31.5008     | ZZ= | 206.0694  |          |
| Eigenvalues: | 114.5531    |          | 180.5304     |     | 216.0025  |          |

|              |          |             |          |              |          |
|--------------|----------|-------------|----------|--------------|----------|
| 12           | C        | Isotropic = | 29.2696  | Anisotropy = | 130.0753 |
| XX=          | 20.7652  | YX=         | -27.6130 | ZX=          | -19.5199 |
| XY=          | -18.3512 | YY=         | -43.3536 | ZY=          | -24.3242 |
| XZ=          | -15.5167 | YZ=         | -22.2865 | ZZ=          | 110.3971 |
| Eigenvalues: | -55.3491 | 27.1713     | 115.9864 |              |          |
| 13           | C        | Isotropic = | 80.3555  | Anisotropy = | 98.7018  |
| XX=          | 63.4146  | YX=         | 38.1766  | ZX=          | -8.9436  |
| XY=          | 45.5579  | YY=         | 36.1188  | ZY=          | -8.9237  |
| XZ=          | -14.3642 | YZ=         | -11.8393 | ZZ=          | 141.5330 |
| Eigenvalues: | 5.7129   | 89.1968     | 146.1566 |              |          |
| 14           | C        | Isotropic = | 43.1925  | Anisotropy = | 193.5513 |
| XX=          | -47.1964 | YX=         | -8.4736  | ZX=          | -39.1245 |
| XY=          | -8.5751  | YY=         | 13.8439  | ZY=          | -25.2563 |
| XZ=          | -32.8465 | YZ=         | -23.8693 | ZZ=          | 162.9299 |
| Eigenvalues: | -55.4985 | 12.8492     | 172.2267 |              |          |
| 15           | C        | Isotropic = | 75.2847  | Anisotropy = | 116.4186 |
| XX=          | 68.2490  | YX=         | -22.0712 | ZX=          | -17.9571 |
| XY=          | -26.9987 | YY=         | 13.1969  | ZY=          | -25.6570 |
| XZ=          | -26.5979 | YZ=         | -24.5746 | ZZ=          | 144.4084 |
| Eigenvalues: | -2.9237  | 75.8808     | 152.8971 |              |          |
| 16           | C        | Isotropic = | 164.3659 | Anisotropy = | 40.9083  |
| XX=          | 189.8660 | YX=         | 5.2076   | ZX=          | 3.1073   |
| XY=          | 2.9732   | YY=         | 158.2196 | ZY=          | 2.3141   |
| XZ=          | 11.4787  | YZ=         | 3.9346   | ZZ=          | 145.0121 |
| Eigenvalues: | 143.4393 | 158.0202    | 191.6381 |              |          |
| 17           | O        | Isotropic = | 216.0541 | Anisotropy = | 46.9955  |
| XX=          | 179.4403 | YX=         | 9.0114   | ZX=          | -5.8715  |
| XY=          | 35.3530  | YY=         | 233.1276 | ZY=          | 6.2977   |
| XZ=          | -4.7201  | YZ=         | 15.0274  | ZZ=          | 235.5944 |
| Eigenvalues: | 170.3133 | 230.4646    | 247.3844 |              |          |
| 18           | C        | Isotropic = | 73.7127  | Anisotropy = | 123.7308 |
| XX=          | 44.1686  | YX=         | -52.9359 | ZX=          | -34.3948 |
| XY=          | -46.5767 | YY=         | 80.4098  | ZY=          | -64.8713 |
| XZ=          | -31.2695 | YZ=         | -67.9373 | ZZ=          | 96.5596  |
| Eigenvalues: | -27.3633 | 92.3014     | 156.1999 |              |          |
| 19           | C        | Isotropic = | 161.8180 | Anisotropy = | 35.4711  |
| XX=          | 154.0903 | YX=         | 4.4443   | ZX=          | 6.3348   |
| XY=          | 4.0336   | YY=         | 173.1074 | ZY=          | 15.6464  |
| XZ=          | 1.4908   | YZ=         | 18.7880  | ZZ=          | 158.2564 |
| Eigenvalues: | 146.7945 | 153.1942    | 185.4654 |              |          |
| 20           | O        | Isotropic = | 280.4920 | Anisotropy = | 52.2017  |
| XX=          | 280.3373 | YX=         | -1.7623  | ZX=          | -7.3264  |
| XY=          | -7.2187  | YY=         | 269.6613 | ZY=          | -22.9066 |
| XZ=          | -42.5157 | YZ=         | -16.5129 | ZZ=          | 291.4774 |
| Eigenvalues: | 247.5878 | 278.5951    | 315.2931 |              |          |
| 21           | H        | Isotropic = | 30.2412  | Anisotropy = | 8.5763   |
| XX=          | 25.8708  | YX=         | -0.1670  | ZX=          | -0.4438  |
| XY=          | 0.4349   | YY=         | 33.8423  | ZY=          | 3.0639   |
| XZ=          | -0.8250  | YZ=         | 3.3964   | ZZ=          | 31.0104  |
| Eigenvalues: | 25.7495  | 29.0154     | 35.9587  |              |          |
| 22           | H        | Isotropic = | 29.6548  | Anisotropy = | 6.1880   |
| XX=          | 32.8498  | YX=         | -1.1008  | ZX=          | -2.0834  |

|              |             |     |         |              |         |        |
|--------------|-------------|-----|---------|--------------|---------|--------|
| XY=          | -1.2096     | YY= | 29.7672 | ZY=          | -0.1707 |        |
| XZ=          | -2.4410     | YZ= | -0.9830 | ZZ=          | 26.3475 |        |
| Eigenvalues: | 25.4473     |     | 29.7371 |              | 33.7801 |        |
| 23 H         | Isotropic = |     | 29.9823 | Anisotropy = |         | 5.4257 |
| XX=          | 32.2558     | YX= | -0.3629 | ZX=          | 2.8346  |        |
| XY=          | -0.7865     | YY= | 26.4847 | ZY=          | -0.4417 |        |
| XZ=          | 0.7208      | YZ= | 0.9002  | ZZ=          | 31.2064 |        |
| Eigenvalues: | 26.3903     |     | 29.9571 |              | 33.5994 |        |
| 24 H         | Isotropic = |     | 29.9863 | Anisotropy = |         | 9.8604 |
| XX=          | 27.8465     | YX= | 1.4643  | ZX=          | -2.6229 |        |
| XY=          | 0.9431      | YY= | 27.1655 | ZY=          | -1.7971 |        |
| XZ=          | -3.9921     | YZ= | -0.9214 | ZZ=          | 34.9469 |        |
| Eigenvalues: | 26.0678     |     | 27.3313 |              | 36.5599 |        |
| 25 H         | Isotropic = |     | 29.2603 | Anisotropy = |         | 7.1034 |
| XX=          | 28.6848     | YX= | -2.3226 | ZX=          | 0.1015  |        |
| XY=          | -1.9959     | YY= | 32.4854 | ZY=          | -1.3035 |        |
| XZ=          | -0.7117     | YZ= | -3.2629 | ZZ=          | 26.6108 |        |
| Eigenvalues: | 25.4696     |     | 28.3155 |              | 33.9959 |        |
| 26 H         | Isotropic = |     | 27.7458 | Anisotropy = |         | 5.6133 |
| XX=          | 28.2098     | YX= | -0.5692 | ZX=          | -0.3758 |        |
| XY=          | 0.3149      | YY= | 28.5624 | ZY=          | 2.9566  |        |
| XZ=          | 1.2310      | YZ= | 4.6941  | ZZ=          | 26.4651 |        |
| Eigenvalues: | 23.5102     |     | 28.2391 |              | 31.4879 |        |
| 27 H         | Isotropic = |     | 28.1096 | Anisotropy = |         | 3.6536 |
| XX=          | 28.5916     | YX= | 0.2774  | ZX=          | -2.4306 |        |
| XY=          | 0.1367      | YY= | 25.9626 | ZY=          | -1.4500 |        |
| XZ=          | 1.3609      | YZ= | -1.8116 | ZZ=          | 29.7746 |        |
| Eigenvalues: | 25.3602     |     | 28.4233 |              | 30.5454 |        |
| 28 H         | Isotropic = |     | 30.6414 | Anisotropy = |         | 8.7694 |
| XX=          | 27.1018     | YX= | -0.0207 | ZX=          | 0.1927  |        |
| XY=          | 0.7161      | YY= | 36.0708 | ZY=          | 2.3555  |        |
| XZ=          | 0.3018      | YZ= | 1.1600  | ZZ=          | 28.7515 |        |
| Eigenvalues: | 27.0644     |     | 28.3721 |              | 36.4876 |        |
| 29 H         | Isotropic = |     | 30.6965 | Anisotropy = |         | 9.5824 |
| XX=          | 27.9749     | YX= | 0.8506  | ZX=          | -1.8172 |        |
| XY=          | 1.4649      | YY= | 31.6344 | ZY=          | -4.7289 |        |
| XZ=          | -2.1330     | YZ= | -4.1815 | ZZ=          | 32.4802 |        |
| Eigenvalues: | 27.0369     |     | 27.9678 |              | 37.0848 |        |
| 30 H         | Isotropic = |     | 30.1366 | Anisotropy = |         | 8.1100 |
| XX=          | 32.6891     | YX= | -2.1374 | ZX=          | 2.6104  |        |
| XY=          | -2.4568     | YY= | 31.4835 | ZY=          | -1.6541 |        |
| XZ=          | 2.8565      | YZ= | -1.6372 | ZZ=          | 26.2374 |        |
| Eigenvalues: | 25.1313     |     | 29.7353 |              | 35.5433 |        |
| 31 H         | Isotropic = |     | 25.7584 | Anisotropy = |         | 6.6138 |
| XX=          | 28.8032     | YX= | 2.0262  | ZX=          | 1.1947  |        |
| XY=          | 1.7835      | YY= | 26.2452 | ZY=          | 1.1723  |        |
| XZ=          | 1.1279      | YZ= | 1.5116  | ZZ=          | 22.2268 |        |
| Eigenvalues: | 21.7685     |     | 25.3391 |              | 30.1676 |        |
| 32 H         | Isotropic = |     | 25.3046 | Anisotropy = |         | 8.1893 |
| XX=          | 30.2995     | YX= | -1.6465 | ZX=          | 0.9874  |        |
| XY=          | -1.3935     | YY= | 24.4199 | ZY=          | 0.1024  |        |
| XZ=          | 0.9225      | YZ= | -0.3142 | ZZ=          | 21.1943 |        |

|              |             |         |              |         |         |
|--------------|-------------|---------|--------------|---------|---------|
| Eigenvalues: | 21.0944     | 24.0552 | 30.7641      |         |         |
| 33 H         | Isotropic = | 29.3623 | Anisotropy = | 8.8665  |         |
| XX=          | 30.0687     | YX=     | -0.2491      | ZX=     | 3.7221  |
| XY=          | -0.3049     | YY=     | 26.3643      | ZY=     | -0.4822 |
| XZ=          | 4.8978      | YZ=     | -0.3973      | ZZ=     | 31.6538 |
| Eigenvalues: | 26.3072     | 26.5063 | 35.2733      |         |         |
| 34 H         | Isotropic = | 29.7539 | Anisotropy = | 8.3516  |         |
| XX=          | 33.6071     | YX=     | -3.0426      | ZX=     | -2.0035 |
| XY=          | -0.9304     | YY=     | 29.4359      | ZY=     | 2.6402  |
| XZ=          | -1.9964     | YZ=     | 2.5773       | ZZ=     | 26.2187 |
| Eigenvalues: | 24.6843     | 29.2558 | 35.3216      |         |         |
| 35 H         | Isotropic = | 29.7266 | Anisotropy = | 7.8681  |         |
| XX=          | 32.0838     | YX=     | 3.7889       | ZX=     | 0.0240  |
| XY=          | 1.5285      | YY=     | 32.3749      | ZY=     | -1.0907 |
| XZ=          | -0.4653     | YZ=     | -0.9779      | ZZ=     | 24.7210 |
| Eigenvalues: | 24.5811     | 29.6267 | 34.9720      |         |         |
| 36 H         | Isotropic = | 28.1331 | Anisotropy = | 14.9420 |         |
| XX=          | 31.0258     | YX=     | -4.6189      | ZX=     | 0.5584  |
| XY=          | -6.5161     | YY=     | 33.5586      | ZY=     | 1.6487  |
| XZ=          | 0.1681      | YZ=     | 2.2415       | ZZ=     | 19.8148 |
| Eigenvalues: | 19.4121     | 26.8926 | 38.0944      |         |         |
| 37 H         | Isotropic = | 26.5765 | Anisotropy = | 6.2212  |         |
| XX=          | 28.5161     | YX=     | 0.3665       | ZX=     | -1.8902 |
| XY=          | -1.2621     | YY=     | 25.3930      | ZY=     | 0.4657  |
| XZ=          | -4.5845     | YZ=     | 0.0329       | ZZ=     | 25.8206 |
| Eigenvalues: | 23.6606     | 25.3450 | 30.7240      |         |         |
| 38 H         | Isotropic = | 26.4977 | Anisotropy = | 8.3326  |         |
| XX=          | 30.1222     | YX=     | -1.3843      | ZX=     | -5.0359 |
| XY=          | 1.1411      | YY=     | 24.3127      | ZY=     | -0.2742 |
| XZ=          | -2.3135     | YZ=     | -0.1530      | ZZ=     | 25.0581 |
| Eigenvalues: | 23.0787     | 24.3616 | 32.0527      |         |         |
| 39 H         | Isotropic = | 28.9547 | Anisotropy = | 4.3142  |         |
| XX=          | 26.8978     | YX=     | 2.5348       | ZX=     | 1.3495  |
| XY=          | 2.2561      | YY=     | 28.4014      | ZY=     | -0.1793 |
| XZ=          | 0.6160      | YZ=     | 0.0225       | ZZ=     | 31.5648 |
| Eigenvalues: | 25.0305     | 30.0028 | 31.8308      |         |         |
| 40 H         | Isotropic = | 29.8120 | Anisotropy = | 7.0376  |         |
| XX=          | 30.7046     | YX=     | -0.5608      | ZX=     | 0.5851  |
| XY=          | -2.0030     | YY=     | 33.8561      | ZY=     | 1.7524  |
| XZ=          | -0.4743     | YZ=     | 1.1627       | ZZ=     | 24.8752 |
| Eigenvalues: | 24.6335     | 30.2987 | 34.5037      |         |         |
| 41 H         | Isotropic = | 29.7847 | Anisotropy = | 8.6866  |         |
| XX=          | 32.2600     | YX=     | 3.1062       | ZX=     | -0.9966 |
| XY=          | 4.9316      | YY=     | 30.6020      | ZY=     | 1.5140  |
| XZ=          | 0.1660      | YZ=     | 1.4183       | ZZ=     | 26.4920 |
| Eigenvalues: | 25.4265     | 28.3519 | 35.5757      |         |         |
| 42 H         | Isotropic = | 29.8650 | Anisotropy = | 18.9450 |         |
| XX=          | 32.0632     | YX=     | 4.4656       | ZX=     | -5.8000 |
| XY=          | 4.8794      | YY=     | 25.0900      | ZY=     | -7.1153 |
| XZ=          | -5.7176     | YZ=     | -8.2449      | ZZ=     | 32.4418 |
| Eigenvalues: | 20.1620     | 26.9379 | 42.4950      |         |         |

Number of frequencies: 120

harmonic frequencies in  $\text{cm}^{-1}$ , reduced masses in amu,

force constants in mDyne/A, and

normal modes in cartesian coordinates: 120

IR intensities in  $\text{km/mol}$

vibration #      1    2    3    4    5    6

-----

frequencies      69.53 83.01 97.27 115.40 137.70 169.97

intensities      0.33 0.98 0.50 0.53 3.88 0.81

reduc. mass      1.82 0.93 1.11 0.93 2.86 1.14

force const      0.01 0.00 0.01 0.01 0.03 0.02

vibration #      7    8    9    10   11   12

-----

frequencies      213.52 218.98 229.45 254.31 258.79 271.39

intensities      0.95 1.33 3.96 3.79 3.90 1.33

reduc. mass      0.74 0.69 0.40 0.71 1.51 1.89

force const      0.02 0.02 0.01 0.03 0.06 0.08

vibration #      13   14   15   16   17   18

-----

frequencies      292.76 305.03 321.92 334.26 339.67 363.29

intensities      1.55 0.07 0.28 1.29 3.17 3.58

reduc. mass      0.28 0.78 0.67 0.27 0.72 0.60

force const      0.01 0.04 0.04 0.02 0.05 0.05



|             |        |        |        |        |        |        |
|-------------|--------|--------|--------|--------|--------|--------|
| vibration # | 19     | 20     | 21     | 22     | 23     | 24     |
| -----       |        |        |        |        |        |        |
| frequencies | 383.37 | 394.52 | 447.17 | 447.66 | 489.19 | 502.94 |
| intensities | 2.94   | 4.31   | 12.76  | 4.58   | 2.01   | 23.83  |
| reduc. mass | 0.73   | 0.59   | 0.72   | 0.86   | 0.93   | 0.62   |
| force const | 0.06   | 0.05   | 0.09   | 0.10   | 0.13   | 0.09   |

|             |        |        |        |        |        |        |
|-------------|--------|--------|--------|--------|--------|--------|
| vibration # | 25     | 26     | 27     | 28     | 29     | 30     |
| -----       |        |        |        |        |        |        |
| frequencies | 520.60 | 523.43 | 557.86 | 571.17 | 592.82 | 603.74 |
| intensities | 9.49   | 17.56  | 31.04  | 50.87  | 11.55  | 17.97  |
| reduc. mass | 1.33   | 0.77   | 0.38   | 0.40   | 0.81   | 1.62   |
| force const | 0.21   | 0.12   | 0.07   | 0.08   | 0.17   | 0.35   |

|             |        |        |        |        |        |        |
|-------------|--------|--------|--------|--------|--------|--------|
| vibration # | 31     | 32     | 33     | 34     | 35     | 36     |
| -----       |        |        |        |        |        |        |
| frequencies | 632.38 | 653.61 | 675.38 | 703.14 | 724.90 | 732.45 |
| intensities | 29.51  | 5.65   | 25.78  | 0.98   | 1.60   | 3.86   |
| reduc. mass | 0.50   | 0.75   | 0.84   | 1.35   | 0.32   | 0.45   |
| force const | 0.12   | 0.19   | 0.23   | 0.39   | 0.10   | 0.14   |

|             |        |        |        |        |        |        |
|-------------|--------|--------|--------|--------|--------|--------|
| vibration # | 37     | 38     | 39     | 40     | 41     | 42     |
| -----       |        |        |        |        |        |        |
| frequencies | 745.82 | 801.49 | 824.27 | 845.19 | 864.68 | 891.06 |
| intensities | 6.96   | 3.82   | 4.57   | 1.48   | 36.27  | 6.00   |
| reduc. mass | 1.11   | 0.79   | 0.92   | 3.04   | 0.54   | 0.89   |
| force const | 0.36   | 0.30   | 0.37   | 1.28   | 0.24   | 0.42   |

|             |    |    |    |    |    |    |
|-------------|----|----|----|----|----|----|
| vibration # | 43 | 44 | 45 | 46 | 47 | 48 |
|-------------|----|----|----|----|----|----|

-----

|             |        |        |        |        |         |         |
|-------------|--------|--------|--------|--------|---------|---------|
| frequencies | 904.46 | 931.04 | 951.16 | 993.91 | 1009.66 | 1010.81 |
| intensities | 12.49  | 0.74   | 10.70  | 1.51   | 20.35   | 17.74   |
| reduc. mass | 0.70   | 1.45   | 0.33   | 0.37   | 0.28    | 0.31    |
| force const | 0.34   | 0.74   | 0.18   | 0.22   | 0.17    | 0.18    |
| <br>        |        |        |        |        |         |         |
| vibration # | 49     | 50     | 51     | 52     | 53      | 54      |

-----

|             |         |         |         |         |         |         |
|-------------|---------|---------|---------|---------|---------|---------|
| frequencies | 1029.37 | 1039.46 | 1049.96 | 1066.99 | 1088.19 | 1097.42 |
| intensities | 29.41   | 3.60    | 13.42   | 67.85   | 92.94   | 20.54   |
| reduc. mass | 0.31    | 0.32    | 0.27    | 0.43    | 0.41    | 0.32    |
| force const | 0.19    | 0.20    | 0.17    | 0.29    | 0.28    | 0.22    |
| <br>        |         |         |         |         |         |         |
| vibration # | 55      | 56      | 57      | 58      | 59      | 60      |

-----

|             |         |         |         |         |         |         |
|-------------|---------|---------|---------|---------|---------|---------|
| frequencies | 1103.16 | 1114.16 | 1143.38 | 1179.82 | 1184.30 | 1217.36 |
| intensities | 31.06   | 20.64   | 11.80   | 31.45   | 6.96    | 75.43   |
| reduc. mass | 0.57    | 0.37    | 0.41    | 0.90    | 0.44    | 0.37    |
| force const | 0.41    | 0.27    | 0.31    | 0.74    | 0.36    | 0.32    |
| <br>        |         |         |         |         |         |         |
| vibration # | 61      | 62      | 63      | 64      | 65      | 66      |

-----

|             |         |         |         |         |         |         |
|-------------|---------|---------|---------|---------|---------|---------|
| frequencies | 1222.27 | 1236.13 | 1248.46 | 1263.08 | 1317.05 | 1335.68 |
| intensities | 38.86   | 9.05    | 82.38   | 16.68   | 10.27   | 57.41   |
| reduc. mass | 0.26    | 0.31    | 0.76    | 0.26    | 1.88    | 0.94    |
| force const | 0.23    | 0.28    | 0.70    | 0.24    | 1.92    | 0.98    |
| <br>        |         |         |         |         |         |         |
| vibration # | 67      | 68      | 69      | 70      | 71      | 72      |

-----

|             |         |         |         |         |         |         |
|-------------|---------|---------|---------|---------|---------|---------|
| frequencies | 1336.74 | 1372.34 | 1401.80 | 1431.89 | 1465.26 | 1483.60 |
| intensities | 99.10   | 33.83   | 78.67   | 687.14  | 64.52   | 40.03   |
| reduc. mass | 0.68    | 0.52    | 0.49    | 0.64    | 0.51    | 0.68    |
| force const | 0.71    | 0.57    | 0.56    | 0.77    | 0.64    | 0.89    |

vibration #      73    74    75    76    77    78

-----

|             |         |         |         |         |         |         |
|-------------|---------|---------|---------|---------|---------|---------|
| frequencies | 1484.73 | 1509.02 | 1511.88 | 1524.06 | 1526.11 | 1553.76 |
| intensities | 60.17   | 5.26    | 99.10   | 86.38   | 10.81   | 16.14   |
| reduc. mass | 0.53    | 0.69    | 1.32    | 1.41    | 0.66    | 0.59    |
| force const | 0.69    | 0.92    | 1.78    | 1.93    | 0.90    | 0.84    |

vibration #      79    80    81    82    83    84

-----

|             |         |         |         |         |         |         |
|-------------|---------|---------|---------|---------|---------|---------|
| frequencies | 1562.09 | 1572.59 | 1577.98 | 1619.40 | 1626.93 | 1641.25 |
| intensities | 19.74   | 28.10   | 22.14   | 89.11   | 2.17    | 1.21    |
| reduc. mass | 0.87    | 0.60    | 0.78    | 0.44    | 0.88    | 0.60    |
| force const | 1.25    | 0.88    | 1.14    | 0.68    | 1.37    | 0.96    |

vibration #      85    86    87    88    89    90

-----

|             |         |         |         |         |         |         |
|-------------|---------|---------|---------|---------|---------|---------|
| frequencies | 1650.59 | 1655.83 | 1658.98 | 1660.17 | 1662.73 | 1664.74 |
| intensities | 57.32   | 27.08   | 49.42   | 27.72   | 1.49    | 17.15   |
| reduc. mass | 0.17    | 0.45    | 0.15    | 0.30    | 0.16    | 0.29    |
| force const | 0.28    | 0.72    | 0.24    | 0.48    | 0.26    | 0.47    |

vibration #      91    92    93    94    95    96

-----

|             |         |         |         |         |         |         |
|-------------|---------|---------|---------|---------|---------|---------|
| frequencies | 1671.57 | 1678.63 | 1679.46 | 1682.20 | 1705.62 | 1794.20 |
|-------------|---------|---------|---------|---------|---------|---------|

|             |       |      |      |       |       |         |
|-------------|-------|------|------|-------|-------|---------|
| intensities | 31.53 | 1.99 | 5.11 | 56.45 | 41.76 | 1210.99 |
| reduc. mass | 0.19  | 0.34 | 0.38 | 1.10  | 1.05  | 1.41    |
| force const | 0.32  | 0.57 | 0.63 | 1.83  | 1.80  | 2.68    |

vibration #      97    98    99    100    101    102

-----

|             |         |         |         |         |         |         |
|-------------|---------|---------|---------|---------|---------|---------|
| frequencies | 1835.81 | 1891.22 | 3022.79 | 3026.82 | 3027.96 | 3058.55 |
| intensities | 290.89  | 22.72   | 316.54  | 462.27  | 711.10  | 284.51  |
| reduc. mass | 1.30    | 0.84    | 0.32    | 0.29    | 0.30    | 0.47    |
| force const | 2.59    | 1.78    | 1.74    | 1.58    | 1.60    | 2.58    |

vibration #      103    104    105    106    107    108

-----

|             |         |         |         |         |         |         |
|-------------|---------|---------|---------|---------|---------|---------|
| frequencies | 3067.35 | 3070.85 | 3087.69 | 3100.90 | 3110.41 | 3126.02 |
| intensities | 398.25  | 157.63  | 362.09  | 481.43  | 223.38  | 352.47  |
| reduc. mass | 0.35    | 0.34    | 0.92    | 0.47    | 0.89    | 0.34    |
| force const | 1.92    | 1.87    | 5.18    | 2.64    | 5.06    | 1.96    |

vibration #      109    110    111    112    113    114

-----

|             |         |         |         |         |         |         |
|-------------|---------|---------|---------|---------|---------|---------|
| frequencies | 3129.67 | 3131.87 | 3136.03 | 3136.66 | 3144.42 | 3146.72 |
| intensities | 280.33  | 710.47  | 179.53  | 245.91  | 358.08  | 637.13  |
| reduc. mass | 0.29    | 0.21    | 0.26    | 0.77    | 0.53    | 0.49    |
| force const | 1.65    | 1.19    | 1.49    | 4.48    | 3.11    | 2.83    |

vibration #      115    116    117    118    119    120

-----

|             |         |         |         |         |         |         |
|-------------|---------|---------|---------|---------|---------|---------|
| frequencies | 3147.56 | 3153.16 | 3154.78 | 3205.98 | 3835.99 | 3858.15 |
| intensities | 316.15  | 425.98  | 244.63  | 329.63  | 30.62   | 30.22   |

|             |      |      |      |      |      |      |
|-------------|------|------|------|------|------|------|
| reduc. mass | 0.44 | 0.55 | 0.85 | 0.56 | 0.95 | 0.95 |
| force const | 2.58 | 3.20 | 5.01 | 3.40 | 8.21 | 8.31 |

Number of imaginary frequencies: 0

## Conformation 2

Boltzmann Population = 2.7% (relative energy = 1.72 kcal/mol)

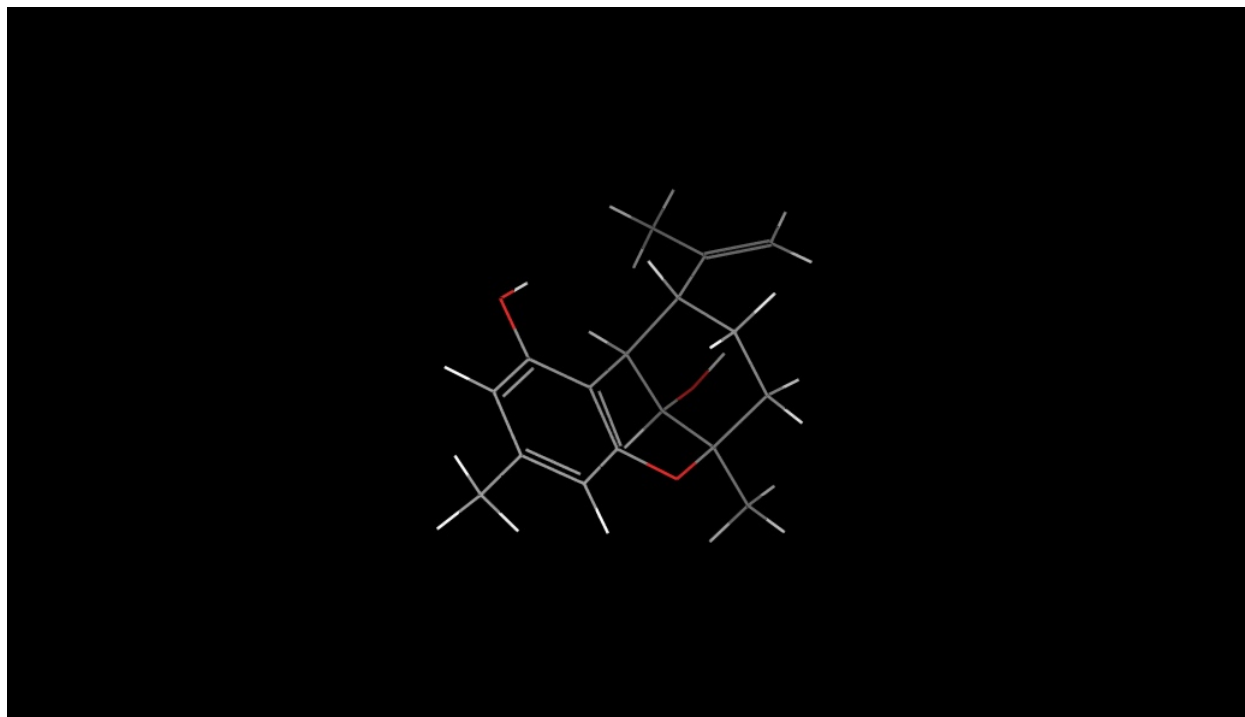

Geometries and Energy Method: M06-2X-D3/6-31G(d,p)

NMR Method: mPW1PW91/6-311+G(2d,p)

Thermodynamic properties for P = 1.00 atm, calculated at 1 temperatures

T = 298.15 K, P = 1.00 atm

Total internal energy,  $U_{\text{tot}}(\text{SCFE} + \text{ZPE} + U)$ : -885.985612 hartrees

Total enthalpy,  $H_{\text{tot}}(U_{\text{tot}} + pV)$ : -885.984668 hartrees

Total Gibbs free energy,  $G_{\text{tot}}(H_{\text{tot}} - T^*S)$ : -886.045277 hartrees

### Geometry Optimization:

| Center<br>Number | Atomic<br>Number | Atomic<br>Type | Coordinates (Angstroms) |           |          |
|------------------|------------------|----------------|-------------------------|-----------|----------|
|                  |                  |                | X                       | Y         | Z        |
| 1                | 6                | 0              | -1.446800               | -1.908400 | 4.737200 |
| 2                | 6                | 0              | -1.088400               | -1.818400 | 3.247700 |
| 3                | 6                | 0              | -2.273300               | -1.386200 | 2.369700 |
| 4                | 6                | 0              | -2.893900               | -0.086800 | 2.968200 |
| 5                | 6                | 0              | -3.361500               | -0.295600 | 4.413800 |

|    |   |   |           |           |          |
|----|---|---|-----------|-----------|----------|
| 6  | 6 | 0 | -2.134300 | -0.642800 | 5.272700 |
| 7  | 6 | 0 | -2.515300 | -0.801500 | 6.734400 |
| 8  | 6 | 0 | -3.310200 | -2.466700 | 2.093000 |
| 9  | 6 | 0 | -1.879100 | 1.029700  | 2.983700 |
| 10 | 6 | 0 | -1.097600 | 1.234800  | 4.124900 |
| 11 | 8 | 0 | -1.205900 | 0.456600  | 5.239700 |
| 12 | 6 | 0 | -1.650300 | 1.861700  | 1.880200 |
| 13 | 6 | 0 | -0.704000 | 2.879100  | 1.923500 |
| 14 | 6 | 0 | 0.048700  | 3.081900  | 3.080100 |
| 15 | 6 | 0 | -0.146800 | 2.252200  | 4.180100 |
| 16 | 6 | 0 | 1.049400  | 4.207700  | 3.142600 |
| 17 | 8 | 0 | -2.337500 | 1.705500  | 0.712700 |
| 18 | 6 | 0 | -3.179700 | -3.739300 | 2.480600 |
| 19 | 6 | 0 | -4.523700 | -2.026000 | 1.311300 |
| 20 | 8 | 0 | -4.392800 | -1.248300 | 4.543000 |
| 21 | 1 | 0 | -0.543300 | -2.079100 | 5.331100 |
| 22 | 1 | 0 | -2.111900 | -2.760000 | 4.926500 |
| 23 | 1 | 0 | -0.286900 | -1.084500 | 3.122800 |
| 24 | 1 | 0 | -0.685200 | -2.771800 | 2.894200 |
| 25 | 1 | 0 | -1.873500 | -1.105000 | 1.382300 |
| 26 | 1 | 0 | -3.775900 | 0.213100  | 2.386900 |
| 27 | 1 | 0 | -3.778500 | 0.646700  | 4.787700 |
| 28 | 1 | 0 | -1.627900 | -1.030700 | 7.330100 |
| 29 | 1 | 0 | -2.953100 | 0.128400  | 7.105800 |
| 30 | 1 | 0 | -3.247400 | -1.602800 | 6.846600 |
| 31 | 1 | 0 | -0.567300 | 3.499400  | 1.044100 |
| 32 | 1 | 0 | 0.431100  | 2.370900  | 5.090300 |
| 33 | 1 | 0 | 1.539600  | 4.353600  | 2.177000 |
| 34 | 1 | 0 | 0.555700  | 5.148300  | 3.407600 |
| 35 | 1 | 0 | 1.817800  | 4.012200  | 3.893800 |
| 36 | 1 | 0 | -2.981300 | 0.994800  | 0.806000 |
| 37 | 1 | 0 | -3.931500 | -4.477500 | 2.218800 |
| 38 | 1 | 0 | -2.328500 | -4.095700 | 3.050200 |
| 39 | 1 | 0 | -4.238000 | -1.392200 | 0.463000 |
| 40 | 1 | 0 | -5.075200 | -2.883900 | 0.922500 |
| 41 | 1 | 0 | -5.199100 | -1.445400 | 1.948200 |
| 42 | 1 | 0 | -4.094600 | -2.089900 | 4.171100 |

-----

SCF GIAO Magnetic shielding tensor (ppm):

|              |          |             |          |              |          |
|--------------|----------|-------------|----------|--------------|----------|
| 1            | C        | Isotropic = | 155.5305 | Anisotropy = | 29.9785  |
| XX=          | 146.8676 | YX=         | 5.1109   | ZX=          | -7.4282  |
| XY=          | 3.4891   | YY=         | 156.3508 | ZY=          | -8.0405  |
| XZ=          | -13.4703 | YZ=         | -13.6667 | ZZ=          | 163.3730 |
| Eigenvalues: | 141.7272 | 149.3481    | 175.5161 |              |          |
| 2            | C        | Isotropic = | 165.2597 | Anisotropy = | 13.9946  |
| XX=          | 156.7696 | YX=         | -0.6375  | ZX=          | -2.1744  |
| XY=          | -1.1736  | YY=         | 174.2994 | ZY=          | 2.5099   |
| XZ=          | 0.2214   | YZ=         | 0.4879   | ZZ=          | 164.7100 |

|              |             |          |              |          |           |
|--------------|-------------|----------|--------------|----------|-----------|
| Eigenvalues: | 156.6216    | 164.5680 | 174.5894     |          |           |
| 3 C          | Isotropic = | 140.4787 | Anisotropy = | 21.7329  |           |
| XX=          | 152.1590    | YX=      | 9.2942       | ZX=      | 14.2968   |
| XY=          | 3.3618      | YY=      | 137.9401     | ZY=      | -2.1290   |
| XZ=          | -5.4026     | YZ=      | -4.3592      | ZZ=      | 131.3370  |
| Eigenvalues: | 128.1229    | 138.3458 | 154.9673     |          |           |
| 4 C          | Isotropic = | 149.4323 | Anisotropy = | 21.7105  |           |
| XX=          | 148.5175    | YX=      | 2.6245       | ZX=      | -1.6809   |
| XY=          | -2.3059     | YY=      | 137.3318     | ZY=      | -6.9847   |
| XZ=          | 0.8079      | YZ=      | -5.4036      | ZZ=      | 162.4476  |
| Eigenvalues: | 135.8870    | 148.5039 | 163.9060     |          |           |
| 5 C          | Isotropic = | 110.9054 | Anisotropy = | 45.7256  |           |
| XX=          | 140.7998    | YX=      | 8.5643       | ZX=      | 5.2439    |
| XY=          | 0.9597      | YY=      | 102.4583     | ZY=      | -3.8160   |
| XZ=          | -5.6489     | YZ=      | -2.6427      | ZZ=      | 89.4583   |
| Eigenvalues: | 88.6846     | 102.6426 | 141.3892     |          |           |
| 6 C          | Isotropic = | 108.8904 | Anisotropy = | 62.2236  |           |
| XX=          | 146.9214    | YX=      | -0.7198      | ZX=      | 11.8874   |
| XY=          | 8.6614      | YY=      | 86.3237      | ZY=      | -5.3622   |
| XZ=          | 15.7580     | YZ=      | -7.0062      | ZZ=      | 93.4262   |
| Eigenvalues: | 80.9476     | 95.3508  | 150.3728     |          |           |
| 7 C          | Isotropic = | 160.3676 | Anisotropy = | 42.0159  |           |
| XX=          | 147.8738    | YX=      | -8.2562      | ZX=      | 0.1746    |
| XY=          | -8.0032     | YY=      | 177.4291     | ZY=      | -19.2760  |
| XZ=          | -0.3825     | YZ=      | -15.6105     | ZZ=      | 155.8000  |
| Eigenvalues: | 142.3681    | 150.3565 | 188.3782     |          |           |
| 8 C          | Isotropic = | 27.2800  | Anisotropy = | 194.2849 |           |
| XX=          | -16.2912    | YX=      | -50.2445     | ZX=      | -27.3455  |
| XY=          | -49.2970    | YY=      | 40.8141      | ZY=      | -111.6543 |
| XZ=          | -31.0513    | YZ=      | -101.2468    | ZZ=      | 57.3172   |
| Eigenvalues: | -97.2404    | 22.2772  | 156.8033     |          |           |
| 9 C          | Isotropic = | 77.3427  | Anisotropy = | 119.5724 |           |
| XX=          | 31.7846     | YX=      | -1.6869      | ZX=      | -23.9911  |
| XY=          | 0.3863      | YY=      | 49.6782      | ZY=      | -17.9718  |
| XZ=          | -21.6221    | YZ=      | -13.9681     | ZZ=      | 150.5655  |
| Eigenvalues: | 26.9508     | 48.0198  | 157.0577     |          |           |
| 10 C         | Isotropic = | 25.8125  | Anisotropy = | 136.4685 |           |
| XX=          | -7.3113     | YX=      | 38.9204      | ZX=      | -13.8034  |
| XY=          | 44.7164     | YY=      | -25.7396     | ZY=      | -18.2745  |
| XZ=          | -14.9860    | YZ=      | -20.8138     | ZZ=      | 110.4885  |
| Eigenvalues: | -59.5831    | 20.2292  | 116.7915     |          |           |
| 11 O         | Isotropic = | 173.6479 | Anisotropy = | 60.5271  |           |
| XX=          | 128.4494    | YX=      | -1.7481      | ZX=      | -16.5906  |
| XY=          | -30.7145    | YY=      | 187.1885     | ZY=      | -2.2099   |
| XZ=          | -10.6028    | YZ=      | -27.8513     | ZZ=      | 205.3059  |
| Eigenvalues: | 120.8026    | 186.1418 | 213.9993     |          |           |
| 12 C         | Isotropic = | 28.6726  | Anisotropy = | 131.4222 |           |
| XX=          | 17.9883     | YX=      | -25.6940     | ZX=      | -20.2985  |
| XY=          | -22.3630    | YY=      | -42.8671     | ZY=      | -23.1894  |
| XZ=          | -16.7406    | YZ=      | -20.0102     | ZZ=      | 110.8968  |
| Eigenvalues: | -55.4594    | 25.1899  | 116.2875     |          |           |
| 13 C         | Isotropic = | 77.1670  | Anisotropy = | 118.9191 |           |



|              |             |          |              |     |          |          |
|--------------|-------------|----------|--------------|-----|----------|----------|
| XX=          | 49.4683     | YX=      | 33.5581      | ZX= | -12.4066 |          |
| XY=          | 39.3596     | YY=      | 27.7190      | ZY= | -11.0355 |          |
| XZ=          | -4.5790     | YZ=      | -9.2237      | ZZ= | 154.3137 |          |
| Eigenvalues: | 0.4864      | 74.5683  | 156.4464     |     |          |          |
| 14 C         | Isotropic = | 41.6004  | Anisotropy = |     |          | 196.9421 |
| XX=          | -50.4284    | YX=      | -6.0477      | ZX= | -34.6851 |          |
| XY=          | -6.3256     | YY=      | 11.1603      | ZY= | -23.7139 |          |
| XZ=          | -35.8373    | YZ=      | -24.1277     | ZZ= | 164.0693 |          |
| Eigenvalues: | -57.5488    | 9.4549   | 172.8951     |     |          |          |
| 15 C         | Isotropic = | 76.2531  | Anisotropy = |     |          | 113.8037 |
| XX=          | 68.9690     | YX=      | -21.0060     | ZX= | -15.8469 |          |
| XY=          | -27.6768    | YY=      | 13.4338      | ZY= | -25.4429 |          |
| XZ=          | -10.8088    | YZ=      | -26.0638     | ZZ= | 146.3566 |          |
| Eigenvalues: | -1.3449     | 77.9820  | 152.1222     |     |          |          |
| 16 C         | Isotropic = | 164.0599 | Anisotropy = |     |          | 40.9816  |
| XX=          | 189.1246    | YX=      | 4.8683       | ZX= | 12.6046  |          |
| XY=          | 4.1064      | YY=      | 158.1322     | ZY= | 3.4778   |          |
| XZ=          | 4.0811      | YZ=      | 2.3134       | ZZ= | 144.9230 |          |
| Eigenvalues: | 143.1130    | 157.6858 | 191.3810     |     |          |          |
| 17 O         | Isotropic = | 222.1072 | Anisotropy = |     |          | 82.0383  |
| XX=          | 173.2220    | YX=      | 10.5439      | ZX= | -14.1387 |          |
| XY=          | 23.8308     | YY=      | 219.0167     | ZY= | -1.7879  |          |
| XZ=          | -0.7264     | YZ=      | 26.1567      | ZZ= | 274.0828 |          |
| Eigenvalues: | 166.3698    | 223.1524 | 276.7994     |     |          |          |
| 18 C         | Isotropic = | 71.8695  | Anisotropy = |     |          | 126.0801 |
| XX=          | 38.3570     | YX=      | -51.6902     | ZX= | -36.0831 |          |
| XY=          | -45.0784    | YY=      | 83.7645      | ZY= | -64.9757 |          |
| XZ=          | -33.3422    | YZ=      | -68.0287     | ZZ= | 93.4870  |          |
| Eigenvalues: | -29.6195    | 89.3052  | 155.9229     |     |          |          |
| 19 C         | Isotropic = | 161.2275 | Anisotropy = |     |          | 35.2401  |
| XX=          | 153.9886    | YX=      | 4.4399       | ZX= | 6.9134   |          |
| XY=          | 3.9202      | YY=      | 171.9697     | ZY= | 15.9794  |          |
| XZ=          | 2.6612      | YZ=      | 18.4845      | ZZ= | 157.7241 |          |
| Eigenvalues: | 145.8185    | 153.1431 | 184.7209     |     |          |          |
| 20 O         | Isotropic = | 278.9242 | Anisotropy = |     |          | 52.2820  |
| XX=          | 278.2628    | YX=      | -2.8547      | ZX= | -8.1891  |          |
| XY=          | -8.5020     | YY=      | 267.8862     | ZY= | -21.3791 |          |
| XZ=          | -43.9221    | YZ=      | -13.9148     | ZZ= | 290.6237 |          |
| Eigenvalues: | 245.9728    | 277.0209 | 313.7789     |     |          |          |
| 21 H         | Isotropic = | 30.2115  | Anisotropy = |     |          | 8.6174   |
| XX=          | 25.8951     | YX=      | -0.0997      | ZX= | -0.3807  |          |
| XY=          | 0.5317      | YY=      | 33.7651      | ZY= | 3.1286   |          |
| XZ=          | -0.7707     | YZ=      | 3.4756       | ZZ= | 30.9743  |          |
| Eigenvalues: | 25.7740     | 28.9041  | 35.9564      |     |          |          |
| 22 H         | Isotropic = | 29.7060  | Anisotropy = |     |          | 6.2457   |
| XX=          | 32.9161     | YX=      | -1.0904      | ZX= | -2.1075  |          |
| XY=          | -1.1698     | YY=      | 29.8880      | ZY= | -0.1352  |          |
| XZ=          | -2.5479     | YZ=      | -0.9301      | ZZ= | 26.3138  |          |
| Eigenvalues: | 25.4108     | 29.8374  | 33.8698      |     |          |          |
| 23 H         | Isotropic = | 29.9314  | Anisotropy = |     |          | 5.3894   |
| XX=          | 32.3595     | YX=      | -0.4895      | ZX= | 2.7294   |          |
| XY=          | -0.8002     | YY=      | 26.3437      | ZY= | -0.4303  |          |

|              |             |         |              |        |         |  |
|--------------|-------------|---------|--------------|--------|---------|--|
| XZ=          | 0.5928      | YZ=     | 0.9420       | ZZ=    | 31.0912 |  |
| Eigenvalues: | 26.2337     |         | 30.0362      |        | 33.5244 |  |
| 24 H         | Isotropic = | 29.9858 | Anisotropy = | 9.9499 |         |  |
| XX=          | 27.8329     | YX=     | 1.4551       | ZX=    | -2.6126 |  |
| XY=          | 0.9548      | YY=     | 27.0940      | ZY=    | -1.7977 |  |
| XZ=          | -3.9906     | YZ=     | -0.9054      | ZZ=    | 35.0306 |  |
| Eigenvalues: | 26.0344     |         | 27.3039      |        | 36.6190 |  |
| 25 H         | Isotropic = | 29.5160 | Anisotropy = | 6.8928 |         |  |
| XX=          | 28.7879     | YX=     | -2.1662      | ZX=    | 0.0538  |  |
| XY=          | -1.8799     | YY=     | 32.6520      | ZY=    | -1.3867 |  |
| XZ=          | -0.9207     | YZ=     | -3.3291      | ZZ=    | 27.1080 |  |
| Eigenvalues: | 25.7744     |         | 28.6623      |        | 34.1112 |  |
| 26 H         | Isotropic = | 28.3560 | Anisotropy = | 5.1284 |         |  |
| XX=          | 28.6567     | YX=     | -0.2816      | ZX=    | -0.3225 |  |
| XY=          | 0.3161      | YY=     | 28.8165      | ZY=    | 2.5658  |  |
| XZ=          | 1.5615      | YZ=     | 4.3561       | ZZ=    | 27.5949 |  |
| Eigenvalues: | 24.6375     |         | 28.6556      |        | 31.7749 |  |
| 27 H         | Isotropic = | 28.0487 | Anisotropy = | 3.6300 |         |  |
| XX=          | 28.5667     | YX=     | 0.2814       | ZX=    | -2.4173 |  |
| XY=          | 0.1154      | YY=     | 25.9272      | ZY=    | -1.5430 |  |
| XZ=          | 1.4442      | YZ=     | -1.8932      | ZZ=    | 29.6522 |  |
| Eigenvalues: | 25.2558     |         | 28.4216      |        | 30.4687 |  |
| 28 H         | Isotropic = | 30.6092 | Anisotropy = | 8.8206 |         |  |
| XX=          | 27.0945     | YX=     | 0.0187       | ZX=    | 0.2548  |  |
| XY=          | 0.7774      | YY=     | 36.0561      | ZY=    | 2.3843  |  |
| XZ=          | 0.3481      | YZ=     | 1.1963       | ZZ=    | 28.6770 |  |
| Eigenvalues: | 27.0384     |         | 28.2996      |        | 36.4896 |  |
| 29 H         | Isotropic = | 30.6740 | Anisotropy = | 9.6152 |         |  |
| XX=          | 27.9214     | YX=     | 0.8448       | ZX=    | -1.8004 |  |
| XY=          | 1.4880      | YY=     | 31.6395      | ZY=    | -4.7552 |  |
| XZ=          | -2.1155     | YZ=     | -4.1842      | ZZ=    | 32.4610 |  |
| Eigenvalues: | 27.0146     |         | 27.9231      |        | 37.0841 |  |
| 30 H         | Isotropic = | 30.1952 | Anisotropy = | 8.1514 |         |  |
| XX=          | 32.7443     | YX=     | -2.1857      | ZX=    | 2.5531  |  |
| XY=          | -2.5316     | YY=     | 31.5764      | ZY=    | -1.6529 |  |
| XZ=          | 2.8029      | YZ=     | -1.6148      | ZZ=    | 26.2649 |  |
| Eigenvalues: | 25.2015     |         | 29.7545      |        | 35.6294 |  |
| 31 H         | Isotropic = | 25.2917 | Anisotropy = | 6.7713 |         |  |
| XX=          | 28.4881     | YX=     | 2.1622       | ZX=    | 1.3539  |  |
| XY=          | 1.7182      | YY=     | 25.9498      | ZY=    | 0.9567  |  |
| XZ=          | 1.2239      | YZ=     | 0.5792       | ZZ=    | 21.4372 |  |
| Eigenvalues: | 21.1676     |         | 24.9015      |        | 29.8059 |  |
| 32 H         | Isotropic = | 25.3336 | Anisotropy = | 8.2809 |         |  |
| XX=          | 30.4516     | YX=     | -1.7046      | ZX=    | 1.0469  |  |
| XY=          | -1.2444     | YY=     | 24.2169      | ZY=    | 0.2936  |  |
| XZ=          | 0.8226      | YZ=     | 0.5227       | ZZ=    | 21.3323 |  |
| Eigenvalues: | 21.1303     |         | 24.0164      |        | 30.8542 |  |
| 33 H         | Isotropic = | 29.6172 | Anisotropy = | 8.2022 |         |  |
| XX=          | 31.7046     | YX=     | -2.9097      | ZX=    | 3.0877  |  |
| XY=          | -1.0716     | YY=     | 30.5081      | ZY=    | -1.8503 |  |
| XZ=          | 3.7126      | YZ=     | -2.4197      | ZZ=    | 26.6388 |  |
| Eigenvalues: | 24.7226     |         | 29.0437      |        | 35.0853 |  |

|              |         |             |         |              |         |
|--------------|---------|-------------|---------|--------------|---------|
| 34           | H       | Isotropic = | 29.3129 | Anisotropy = | 9.0885  |
| XX=          | 32.6866 | YX=         | 0.6978  | ZX=          | -3.4890 |
| XY=          | 1.1183  | YY=         | 26.4096 | ZY=          | -0.1810 |
| XZ=          | -4.6933 | YZ=         | -0.2548 | ZZ=          | 28.8426 |
| Eigenvalues: | 25.9795 |             | 26.5874 |              | 35.3719 |
| 35           | H       | Isotropic = | 29.7593 | Anisotropy = | 7.6857  |
| XX=          | 31.2600 | YX=         | 2.6225  | ZX=          | 2.5558  |
| XY=          | 0.3776  | YY=         | 31.2168 | ZY=          | 3.1860  |
| XZ=          | 2.3093  | YZ=         | 3.6627  | ZZ=          | 26.8009 |
| Eigenvalues: | 24.5958 |             | 29.7989 |              | 34.8831 |
| 36           | H       | Isotropic = | 27.6509 | Anisotropy = | 13.5470 |
| XX=          | 36.2006 | YX=         | -1.5471 | ZX=          | 2.6625  |
| XY=          | 0.2543  | YY=         | 28.9442 | ZY=          | 2.8215  |
| XZ=          | 3.2482  | YZ=         | 0.5972  | ZZ=          | 17.8079 |
| Eigenvalues: | 17.0750 |             | 29.1955 |              | 36.6823 |
| 37           | H       | Isotropic = | 26.5051 | Anisotropy = | 6.2356  |
| XX=          | 28.3347 | YX=         | 0.2718  | ZX=          | -1.9332 |
| XY=          | -1.2206 | YY=         | 25.3731 | ZY=          | 0.5142  |
| XZ=          | -4.6583 | YZ=         | 0.1179  | ZZ=          | 25.8076 |
| Eigenvalues: | 23.5414 |             | 25.3118 |              | 30.6622 |
| 38           | H       | Isotropic = | 26.4307 | Anisotropy = | 8.4046  |
| XX=          | 30.0291 | YX=         | -1.3581 | ZX=          | -5.0847 |
| XY=          | 1.0764  | YY=         | 24.2428 | ZY=          | -0.2010 |
| XZ=          | -2.4139 | YZ=         | -0.1194 | ZZ=          | 25.0202 |
| Eigenvalues: | 22.9816 |             | 24.2767 |              | 32.0337 |
| 39           | H       | Isotropic = | 30.1196 | Anisotropy = | 7.3480  |
| XX=          | 30.4499 | YX=         | -0.3660 | ZX=          | 0.6405  |
| XY=          | -1.7904 | YY=         | 34.5667 | ZY=          | 1.6894  |
| XZ=          | -0.4099 | YZ=         | 1.1263  | ZZ=          | 25.3421 |
| Eigenvalues: | 25.1177 |             | 30.2228 |              | 35.0182 |
| 40           | H       | Isotropic = | 29.6568 | Anisotropy = | 8.6586  |
| XX=          | 32.5318 | YX=         | 3.0175  | ZX=          | -0.7909 |
| XY=          | 4.7356  | YY=         | 30.0456 | ZY=          | 1.6403  |
| XZ=          | 0.4146  | YZ=         | 1.5298  | ZZ=          | 26.3929 |
| Eigenvalues: | 25.3146 |             | 28.2264 |              | 35.4292 |
| 41           | H       | Isotropic = | 28.8261 | Anisotropy = | 4.0918  |
| XX=          | 26.8385 | YX=         | 2.7002  | ZX=          | 1.2837  |
| XY=          | 2.3677  | YY=         | 28.3086 | ZY=          | -0.2048 |
| XZ=          | 0.4654  | YZ=         | -0.0592 | ZZ=          | 31.3311 |
| Eigenvalues: | 24.8413 |             | 30.0830 |              | 31.5539 |
| 42           | H       | Isotropic = | 30.0051 | Anisotropy = | 17.9365 |
| XX=          | 32.5099 | YX=         | 3.9150  | ZX=          | -5.9510 |
| XY=          | 4.3125  | YY=         | 24.6393 | ZY=          | -6.0228 |
| XZ=          | -5.8989 | YZ=         | -7.1085 | ZZ=          | 32.8662 |
| Eigenvalues: | 20.9405 |             | 27.1121 |              | 41.9628 |

Number of frequencies: 120

harmonic frequencies in  $\text{cm}^{-1}$ , reduced masses in amu,

force constants in mDyne/A, and

normal modes in cartesian coordinates: 120

IR intensities in  $\text{km/mol}$

vibration #      1    2    3    4    5    6

-----

frequencies      70.87 85.53 96.84 127.11 138.18 171.42

intensities      0.33 1.25 0.14 2.30 3.66 1.16

reduc. mass      1.60 0.80 1.26 1.85 2.18 1.30

force const      0.00 0.00 0.01 0.02 0.02 0.02

vibration #      7    8    9    10   11   12

-----

frequencies      214.48 221.57 245.28 254.39 262.27 282.36

intensities      0.25 0.55 5.75 2.03 2.54 6.18

reduc. mass      0.87 0.83 1.51 0.78 1.08 2.05

force const      0.02 0.02 0.05 0.03 0.04 0.10

vibration #      13   14   15   16   17   18

-----

frequencies      294.85 311.12 321.08 332.46 337.34 355.39

intensities      1.29 0.96 2.24 1.49 2.72 1.07

reduc. mass      0.22 0.23 0.67 0.25 0.62 0.67

force const      0.01 0.01 0.04 0.02 0.04 0.05

vibration #      19   20   21   22   23   24

-----

|             |        |        |        |        |        |        |
|-------------|--------|--------|--------|--------|--------|--------|
| frequencies | 379.30 | 382.64 | 413.55 | 443.43 | 463.99 | 491.08 |
| intensities | 5.97   | 9.38   | 13.19  | 1.62   | 26.64  | 6.81   |
| reduc. mass | 0.46   | 0.58   | 0.35   | 0.73   | 0.35   | 1.28   |
| force const | 0.04   | 0.05   | 0.04   | 0.09   | 0.04   | 0.18   |

vibration #      25    26    27    28    29    30

-----

|             |        |        |        |        |        |        |
|-------------|--------|--------|--------|--------|--------|--------|
| frequencies | 509.52 | 523.55 | 526.67 | 563.12 | 588.64 | 598.75 |
| intensities | 15.34  | 7.35   | 16.49  | 9.70   | 7.68   | 16.45  |
| reduc. mass | 0.70   | 2.20   | 0.81   | 0.68   | 0.50   | 0.87   |
| force const | 0.11   | 0.35   | 0.13   | 0.13   | 0.10   | 0.18   |

vibration #      31    32    33    34    35    36

-----

|             |        |        |        |        |        |        |
|-------------|--------|--------|--------|--------|--------|--------|
| frequencies | 620.79 | 660.33 | 686.39 | 699.99 | 727.84 | 739.49 |
| intensities | 34.81  | 20.60  | 36.20  | 2.14   | 5.53   | 1.96   |
| reduc. mass | 0.52   | 0.87   | 0.41   | 1.19   | 0.35   | 0.50   |
| force const | 0.12   | 0.22   | 0.11   | 0.34   | 0.11   | 0.16   |

vibration #      37    38    39    40    41    42

-----

|             |        |        |        |        |        |        |
|-------------|--------|--------|--------|--------|--------|--------|
| frequencies | 753.96 | 800.36 | 822.69 | 828.24 | 863.38 | 891.32 |
| intensities | 0.74   | 3.67   | 4.96   | 2.26   | 28.10  | 2.31   |
| reduc. mass | 1.86   | 0.84   | 0.95   | 1.36   | 0.59   | 0.81   |
| force const | 0.62   | 0.32   | 0.38   | 0.55   | 0.26   | 0.38   |

vibration #      43    44    45    46    47    48

-----

|             |        |        |        |        |         |         |
|-------------|--------|--------|--------|--------|---------|---------|
| frequencies | 904.20 | 931.86 | 952.84 | 993.89 | 1006.33 | 1012.89 |
|-------------|--------|--------|--------|--------|---------|---------|

|             |       |      |       |      |      |       |
|-------------|-------|------|-------|------|------|-------|
| intensities | 13.74 | 1.53 | 14.04 | 0.64 | 4.11 | 24.57 |
| reduc. mass | 0.70  | 1.53 | 0.31  | 0.34 | 0.31 | 0.28  |
| force const | 0.34  | 0.78 | 0.16  | 0.20 | 0.18 | 0.17  |

vibration #      49    50    51    52    53    54

-----

|             |         |         |         |         |         |         |
|-------------|---------|---------|---------|---------|---------|---------|
| frequencies | 1026.93 | 1034.39 | 1044.74 | 1059.88 | 1081.96 | 1095.11 |
| intensities | 39.38   | 19.48   | 16.31   | 31.01   | 5.73    | 17.54   |
| reduc. mass | 0.28    | 0.28    | 0.29    | 0.28    | 0.40    | 0.57    |
| force const | 0.17    | 0.18    | 0.19    | 0.19    | 0.28    | 0.41    |

vibration #      55    56    57    58    59    60

-----

|             |         |         |         |         |         |         |
|-------------|---------|---------|---------|---------|---------|---------|
| frequencies | 1102.10 | 1114.67 | 1155.36 | 1168.95 | 1202.86 | 1207.57 |
| intensities | 10.84   | 54.71   | 8.06    | 10.92   | 10.67   | 282.63  |
| reduc. mass | 0.56    | 0.43    | 0.74    | 0.91    | 0.64    | 0.42    |
| force const | 0.40    | 0.32    | 0.59    | 0.73    | 0.55    | 0.36    |

vibration #      61    62    63    64    65    66

-----

|             |         |         |         |         |         |         |
|-------------|---------|---------|---------|---------|---------|---------|
| frequencies | 1220.53 | 1235.65 | 1257.79 | 1263.82 | 1317.91 | 1332.71 |
| intensities | 36.57   | 14.32   | 131.78  | 7.18    | 10.16   | 127.00  |
| reduc. mass | 0.29    | 0.34    | 0.91    | 0.28    | 1.65    | 0.55    |
| force const | 0.25    | 0.30    | 0.85    | 0.27    | 1.68    | 0.58    |

vibration #      67    68    69    70    71    72

-----

|             |         |         |         |         |         |         |
|-------------|---------|---------|---------|---------|---------|---------|
| frequencies | 1338.90 | 1370.54 | 1397.31 | 1417.01 | 1462.30 | 1480.67 |
| intensities | 40.13   | 24.41   | 35.06   | 682.63  | 32.09   | 23.83   |

|             |      |      |      |      |      |      |
|-------------|------|------|------|------|------|------|
| reduc. mass | 0.58 | 0.45 | 0.49 | 0.89 | 0.69 | 0.55 |
| force const | 0.61 | 0.50 | 0.56 | 1.05 | 0.88 | 0.71 |

vibration #      73    74    75    76    77    78

-----

|             |         |         |         |         |         |         |
|-------------|---------|---------|---------|---------|---------|---------|
| frequencies | 1489.02 | 1504.32 | 1519.45 | 1523.34 | 1526.95 | 1554.15 |
|-------------|---------|---------|---------|---------|---------|---------|

|             |        |      |        |       |       |      |
|-------------|--------|------|--------|-------|-------|------|
| intensities | 100.61 | 3.01 | 214.63 | 13.55 | 71.85 | 8.79 |
|-------------|--------|------|--------|-------|-------|------|

|             |      |      |      |      |      |      |
|-------------|------|------|------|------|------|------|
| reduc. mass | 0.95 | 0.75 | 1.32 | 0.82 | 1.03 | 0.68 |
|-------------|------|------|------|------|------|------|

|             |      |      |      |      |      |      |
|-------------|------|------|------|------|------|------|
| force const | 1.24 | 1.00 | 1.79 | 1.12 | 1.41 | 0.97 |
|-------------|------|------|------|------|------|------|

vibration #      79    80    81    82    83    84

-----

|             |         |         |         |         |         |         |
|-------------|---------|---------|---------|---------|---------|---------|
| frequencies | 1558.30 | 1573.16 | 1582.94 | 1613.90 | 1628.98 | 1644.50 |
|-------------|---------|---------|---------|---------|---------|---------|

|             |       |       |       |       |       |      |
|-------------|-------|-------|-------|-------|-------|------|
| intensities | 15.00 | 17.01 | 18.65 | 83.59 | 20.78 | 3.87 |
|-------------|-------|-------|-------|-------|-------|------|

|             |      |      |      |      |      |      |
|-------------|------|------|------|------|------|------|
| reduc. mass | 0.85 | 0.66 | 0.74 | 0.36 | 0.73 | 0.54 |
|-------------|------|------|------|------|------|------|

|             |      |      |      |      |      |      |
|-------------|------|------|------|------|------|------|
| force const | 1.21 | 0.96 | 1.09 | 0.55 | 1.15 | 0.87 |
|-------------|------|------|------|------|------|------|

vibration #      85    86    87    88    89    90

-----

|             |         |         |         |         |         |         |
|-------------|---------|---------|---------|---------|---------|---------|
| frequencies | 1649.40 | 1658.37 | 1659.86 | 1660.97 | 1661.63 | 1664.11 |
|-------------|---------|---------|---------|---------|---------|---------|

|             |        |       |       |       |       |       |
|-------------|--------|-------|-------|-------|-------|-------|
| intensities | 102.11 | 29.66 | 30.85 | 18.40 | 11.18 | 18.80 |
|-------------|--------|-------|-------|-------|-------|-------|

|             |      |      |      |      |      |      |
|-------------|------|------|------|------|------|------|
| reduc. mass | 0.29 | 0.17 | 0.24 | 0.24 | 0.36 | 0.17 |
|-------------|------|------|------|------|------|------|

|             |      |      |      |      |      |      |
|-------------|------|------|------|------|------|------|
| force const | 0.46 | 0.28 | 0.39 | 0.38 | 0.59 | 0.28 |
|-------------|------|------|------|------|------|------|

vibration #      91    92    93    94    95    96

-----

|             |         |         |         |         |         |         |
|-------------|---------|---------|---------|---------|---------|---------|
| frequencies | 1672.83 | 1678.14 | 1679.14 | 1687.04 | 1707.20 | 1798.05 |
|-------------|---------|---------|---------|---------|---------|---------|

|             |       |      |      |        |       |         |
|-------------|-------|------|------|--------|-------|---------|
| intensities | 37.99 | 2.48 | 4.62 | 192.92 | 44.12 | 1267.01 |
|-------------|-------|------|------|--------|-------|---------|

|             |      |      |      |      |      |      |
|-------------|------|------|------|------|------|------|
| reduc. mass | 0.24 | 0.37 | 0.38 | 1.50 | 1.06 | 1.38 |
|-------------|------|------|------|------|------|------|

force const 0.39 0.62 0.63 2.52 1.82 2.62

vibration # 97 98 99 100 101 102

-----

frequencies 1830.17 1892.12 3020.84 3027.26 3029.22 3058.96

intensities 361.28 20.79 338.42 510.39 634.34 263.06

reduc. mass 1.29 0.85 0.34 0.25 0.25 0.48

force const 2.55 1.80 1.80 1.36 1.37 2.63

vibration # 103 104 105 106 107 108

-----

frequencies 3059.40 3071.54 3082.97 3090.85 3103.12 3125.79

intensities 294.07 294.84 301.71 290.86 518.29 250.53

reduc. mass 0.83 0.43 0.84 0.87 0.48 0.20

force const 4.57 2.39 4.73 4.89 2.72 1.15

vibration # 109 110 111 112 113 114

-----

frequencies 3127.21 3131.90 3136.40 3145.23 3146.25 3147.72

intensities 325.31 261.40 560.88 363.50 581.37 173.12

reduc. mass 0.26 0.18 0.31 0.53 0.58 0.46

force const 1.47 1.03 1.79 3.09 3.36 2.70

vibration # 115 116 117 118 119 120

-----

frequencies 3152.77 3154.54 3155.82 3205.37 3837.79 3857.40

intensities 414.10 536.92 123.04 328.97 23.28 13.04

reduc. mass 0.52 0.43 0.47 0.57 0.95 0.95

force const 3.07 2.53 2.75 3.43 8.22 8.31



Number of imaginary frequencies: 0

### Conformation 3

Boltzmann Population = 49.3% (relative energy = 0.00 kcal/mol)

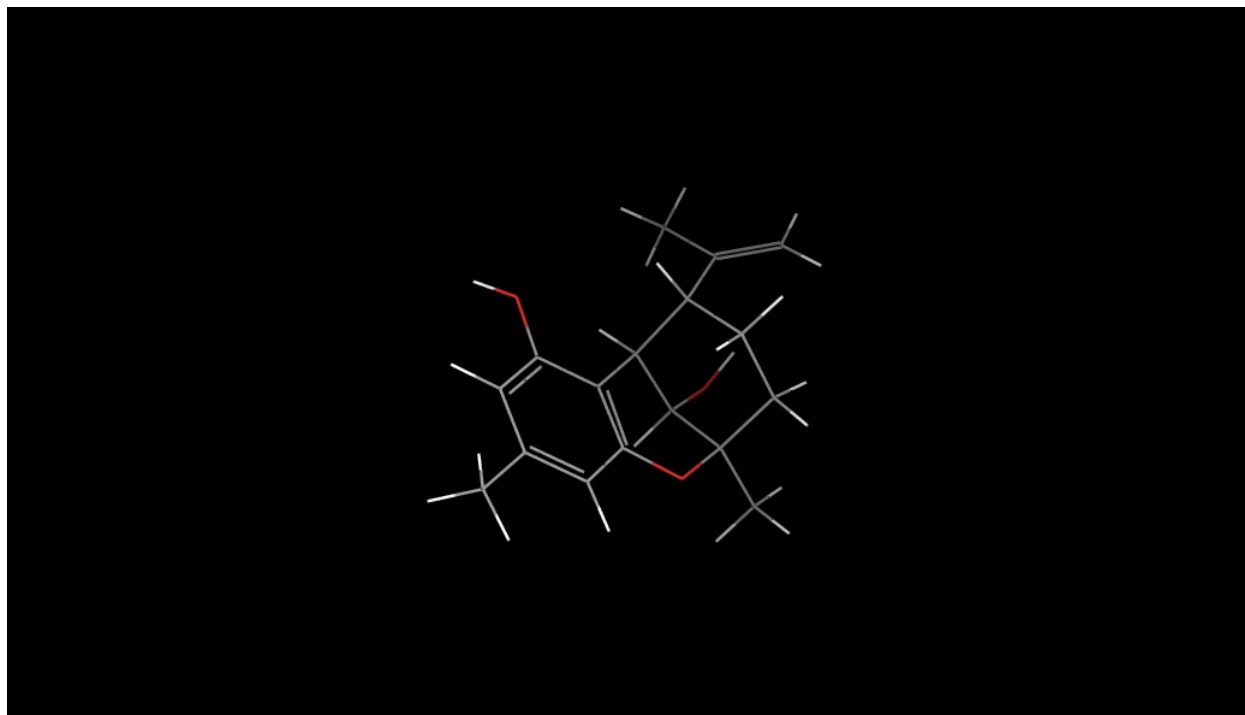

Geometries and Energy Method: M06-2X-D3/6-31G(d,p)

NMR Method: mPW1PW91/6-311+G(2d,p)

Thermodynamic properties for P = 1.00 atm, calculated at 1 temperatures

T = 298.15 K, P = 1.00 atm

Total internal energy,  $U_{\text{tot}}(\text{SCFE} + \text{ZPE} + U)$ : -885.988429 hartrees

Total enthalpy,  $H_{\text{tot}}(U_{\text{tot}} + pV)$ : -885.987485 hartrees

Total Gibbs free energy,  $G_{\text{tot}}(H_{\text{tot}} - T^*S)$ : -886.048189 hartrees

Optimized geometry:

| Center<br>Number | Atomic<br>Number | Atomic<br>Type | Coordinates (Angstroms) |           |          |
|------------------|------------------|----------------|-------------------------|-----------|----------|
|                  |                  |                | X                       | Y         | Z        |
| 1                | 6                | 0              | -1.363700               | -1.965000 | 4.792800 |
| 2                | 6                | 0              | -1.015000               | -1.886700 | 3.300200 |
| 3                | 6                | 0              | -2.211000               | -1.492900 | 2.420000 |

|    |   |   |           |           |          |
|----|---|---|-----------|-----------|----------|
| 4  | 6 | 0 | -2.878700 | -0.213600 | 3.006000 |
| 5  | 6 | 0 | -3.327800 | -0.418500 | 4.456200 |
| 6  | 6 | 0 | -2.083700 | -0.712100 | 5.313600 |
| 7  | 6 | 0 | -2.447200 | -0.855400 | 6.780900 |
| 8  | 6 | 0 | -3.215800 | -2.601200 | 2.141800 |
| 9  | 6 | 0 | -1.896200 | 0.926400  | 3.008200 |
| 10 | 6 | 0 | -1.112100 | 1.176100  | 4.132700 |
| 11 | 8 | 0 | -1.183600 | 0.414600  | 5.257600 |
| 12 | 6 | 0 | -1.714900 | 1.747600  | 1.890700 |
| 13 | 6 | 0 | -0.806900 | 2.798200  | 1.901100 |
| 14 | 6 | 0 | -0.041500 | 3.046800  | 3.046500 |
| 15 | 6 | 0 | -0.195000 | 2.232000  | 4.159200 |
| 16 | 6 | 0 | 0.944800  | 4.187300  | 3.053100 |
| 17 | 8 | 0 | -2.475200 | 1.445700  | 0.796600 |
| 18 | 6 | 0 | -3.064700 | -3.865800 | 2.549300 |
| 19 | 6 | 0 | -4.424300 | -2.190200 | 1.336500 |
| 20 | 8 | 0 | -4.319800 | -1.408900 | 4.614900 |
| 21 | 1 | 0 | -0.453700 | -2.105400 | 5.385200 |
| 22 | 1 | 0 | -2.008200 | -2.829000 | 4.996400 |
| 23 | 1 | 0 | -0.229900 | -1.136700 | 3.163300 |
| 24 | 1 | 0 | -0.590100 | -2.835700 | 2.959500 |
| 25 | 1 | 0 | -1.828600 | -1.195400 | 1.432400 |
| 26 | 1 | 0 | -3.740500 | 0.066800  | 2.394700 |
| 27 | 1 | 0 | -3.776300 | 0.512800  | 4.822800 |
| 28 | 1 | 0 | -1.550100 | -1.054600 | 7.373200 |
| 29 | 1 | 0 | -2.903200 | 0.070500  | 7.140700 |
| 30 | 1 | 0 | -3.160100 | -1.671000 | 6.910500 |
| 31 | 1 | 0 | -0.688400 | 3.424400  | 1.019200 |
| 32 | 1 | 0 | 0.388000  | 2.389000  | 5.060100 |
| 33 | 1 | 0 | 1.707300  | 4.049500  | 2.280300 |
| 34 | 1 | 0 | 0.443700  | 5.138900  | 2.851800 |
| 35 | 1 | 0 | 1.450200  | 4.267200  | 4.017500 |
| 36 | 1 | 0 | -2.287100 | 2.082700  | 0.098500 |
| 37 | 1 | 0 | -3.795400 | -4.624200 | 2.284600 |
| 38 | 1 | 0 | -2.214700 | -4.195900 | 3.136700 |
| 39 | 1 | 0 | -5.135900 | -1.651000 | 1.970700 |
| 40 | 1 | 0 | -4.139500 | -1.516100 | 0.521400 |
| 41 | 1 | 0 | -4.932300 | -3.059700 | 0.915100 |
| 42 | 1 | 0 | -4.017700 | -2.227000 | 4.196300 |

-----

Calculating GIAO nuclear magnetic shielding tensors.

SCF GIAO Magnetic shielding tensor (ppm):

1 C Isotropic = 155.1828 Anisotropy = 30.0317

XX= 146.2775 YX= 4.9659 ZX= -7.7531

XY= 3.3801 YY= 156.3030 ZY= -7.8666

XZ= -13.7499 YZ= -13.5900 ZZ= 162.9678

Eigenvalues: 140.9233 149.4211 175.2039

2 C Isotropic = 165.0725 Anisotropy = 13.9653

|              |          |             |           |              |           |          |  |
|--------------|----------|-------------|-----------|--------------|-----------|----------|--|
| XX=          | 156.5747 | YX=         | -0.5833   | ZX=          | -2.5056   |          |  |
| XY=          | -1.2925  | YY=         | 174.0822  | ZY=          | 2.3912    |          |  |
| XZ=          | 0.0700   | YZ=         | 0.6078    | ZZ=          | 164.5605  |          |  |
| Eigenvalues: | 156.3644 | 164.4703    | 174.3827  |              |           |          |  |
| 3            | C        | Isotropic = | 140.8539  | Anisotropy = |           | 21.2693  |  |
| XX=          | 151.8619 | YX=         | 9.8795    | ZX=          | 13.1906   |          |  |
| XY=          | 3.9895   | YY=         | 138.8192  | ZY=          | -2.0079   |          |  |
| XZ=          | -5.9337  | YZ=         | -4.9155   | ZZ=          | 131.8806  |          |  |
| Eigenvalues: | 128.7283 | 138.7999    | 155.0335  |              |           |          |  |
| 4            | C        | Isotropic = | 149.7840  | Anisotropy = |           | 19.7113  |  |
| XX=          | 150.5472 | YX=         | 2.2269    | ZX=          | -1.3480   |          |  |
| XY=          | -3.2846  | YY=         | 137.7404  | ZY=          | -8.1019   |          |  |
| XZ=          | 2.4347   | YZ=         | -5.4479   | ZZ=          | 161.0643  |          |  |
| Eigenvalues: | 135.9060 | 150.5211    | 162.9249  |              |           |          |  |
| 5            | C        | Isotropic = | 111.2106  | Anisotropy = |           | 45.8554  |  |
| XX=          | 141.2222 | YX=         | 8.4354    | ZX=          | 5.0017    |          |  |
| XY=          | 0.8169   | YY=         | 102.1342  | ZY=          | -3.4134   |          |  |
| XZ=          | -6.2783  | YZ=         | -2.5420   | ZZ=          | 90.2754   |          |  |
| Eigenvalues: | 89.5658  | 102.2851    | 141.7809  |              |           |          |  |
| 6            | C        | Isotropic = | 107.9125  | Anisotropy = |           | 63.7005  |  |
| XX=          | 146.8115 | YX=         | -0.8753   | ZX=          | 12.2357   |          |  |
| XY=          | 8.6073   | YY=         | 84.6035   | ZY=          | -4.9031   |          |  |
| XZ=          | 16.1831  | YZ=         | -6.8676   | ZZ=          | 92.3224   |          |  |
| Eigenvalues: | 79.7040  | 93.6539     | 150.3795  |              |           |          |  |
| 7            | C        | Isotropic = | 160.3698  | Anisotropy = |           | 41.9490  |  |
| XX=          | 147.7335 | YX=         | -8.3362   | ZX=          | 0.2590    |          |  |
| XY=          | -8.0358  | YY=         | 177.4243  | ZY=          | -19.1606  |          |  |
| XZ=          | -0.3588  | YZ=         | -15.4954  | ZZ=          | 155.9516  |          |  |
| Eigenvalues: | 142.4211 | 150.3526    | 188.3358  |              |           |          |  |
| 8            | C        | Isotropic = | 25.1458   | Anisotropy = |           | 197.3051 |  |
| XX=          | -17.1061 | YX=         | -50.5760  | ZX=          | -23.8942  |          |  |
| XY=          | -49.5900 | YY=         | 33.1125   | ZY=          | -113.8449 |          |  |
| XZ=          | -27.2396 | YZ=         | -102.9131 | ZZ=          | 59.4312   |          |  |
| Eigenvalues: | -99.3050 | 18.0600     | 156.6826  |              |           |          |  |
| 9            | C        | Isotropic = | 73.3015   | Anisotropy = |           | 127.8937 |  |
| XX=          | 26.9624  | YX=         | 1.2387    | ZX=          | -24.1023  |          |  |
| XY=          | 3.2540   | YY=         | 40.7167   | ZY=          | -20.0095  |          |  |
| XZ=          | -20.1853 | YZ=         | -14.3220  | ZZ=          | 152.2254  |          |  |
| Eigenvalues: | 23.1322  | 38.2084     | 158.5640  |              |           |          |  |
| 10           | C        | Isotropic = | 24.6192   | Anisotropy = |           | 138.9214 |  |
| XX=          | -13.1401 | YX=         | 37.6425   | ZX=          | -14.7057  |          |  |
| XY=          | 45.6550  | YY=         | -23.7110  | ZY=          | -18.0571  |          |  |
| XZ=          | -15.7588 | YZ=         | -21.4315  | ZZ=          | 110.7087  |          |  |
| Eigenvalues: | -60.5455 | 17.1696     | 117.2335  |              |           |          |  |
| 11           | O        | Isotropic = | 170.1189  | Anisotropy = |           | 68.7492  |  |
| XX=          | 122.7174 | YX=         | -2.4467   | ZX=          | -18.1844  |          |  |
| XY=          | -30.5263 | YY=         | 181.1352  | ZY=          | -4.1280   |          |  |
| XZ=          | -12.6953 | YZ=         | -30.9853  | ZZ=          | 206.5041  |          |  |
| Eigenvalues: | 114.2023 | 180.2027    | 215.9517  |              |           |          |  |
| 12           | C        | Isotropic = | 29.1512   | Anisotropy = |           | 130.0312 |  |
| XX=          | 21.3768  | YX=         | -27.7333  | ZX=          | -19.4852  |          |  |
| XY=          | -17.6822 | YY=         | -44.2198  | ZY=          | -23.7280  |          |  |

|              |             |          |              |     |          |          |
|--------------|-------------|----------|--------------|-----|----------|----------|
| XZ=          | -15.5612    | YZ=      | -22.3405     | ZZ= | 110.2965 |          |
| Eigenvalues: | -55.8026    |          | 27.4175      |     | 115.8387 |          |
| 13 C         | Isotropic = | 80.6698  | Anisotropy = |     |          | 101.8142 |
| XX=          | 60.5363     | YX=      | 36.0094      | ZX= | -9.4075  |          |
| XY=          | 44.9230     | YY=      | 35.7828      | ZY= | -8.8923  |          |
| XZ=          | -8.7277     | YZ=      | -9.6704      | ZZ= | 145.6903 |          |
| Eigenvalues: | 5.8119      |          | 87.6515      |     | 148.5459 |          |
| 14 C         | Isotropic = | 43.2550  | Anisotropy = |     |          | 193.2939 |
| XX=          | -47.2711    | YX=      | -9.0271      | ZX= | -36.7550 |          |
| XY=          | -8.7210     | YY=      | 14.0109      | ZY= | -24.6821 |          |
| XZ=          | -34.4090    | YZ=      | -23.9761     | ZZ= | 163.0252 |          |
| Eigenvalues: | -55.5290    |          | 13.1765      |     | 172.1176 |          |
| 15 C         | Isotropic = | 74.7773  | Anisotropy = |     |          | 112.5149 |
| XX=          | 68.8997     | YX=      | -23.2985     | ZX= | -16.7766 |          |
| XY=          | -27.2275    | YY=      | 12.6138      | ZY= | -25.4847 |          |
| XZ=          | -18.6881    | YZ=      | -25.5101     | ZZ= | 142.8186 |          |
| Eigenvalues: | -3.3125     |          | 77.8573      |     | 149.7873 |          |
| 16 C         | Isotropic = | 164.4513 | Anisotropy = |     |          | 41.0520  |
| XX=          | 188.9955    | YX=      | 9.2530       | ZX= | 8.0502   |          |
| XY=          | 3.5294      | YY=      | 159.0099     | ZY= | 3.0057   |          |
| XZ=          | 7.6785      | YZ=      | 3.8547       | ZZ= | 145.3485 |          |
| Eigenvalues: | 143.6135    |          | 157.9210     |     | 191.8193 |          |
| 17 O         | Isotropic = | 216.2578 | Anisotropy = |     |          | 46.4307  |
| XX=          | 179.3834    | YX=      | 8.8581       | ZX= | -5.9592  |          |
| XY=          | 35.0712     | YY=      | 234.0019     | ZY= | 6.3508   |          |
| XZ=          | -3.7892     | YZ=      | 13.5334      | ZZ= | 235.3880 |          |
| Eigenvalues: | 170.6691    |          | 230.8926     |     | 247.2116 |          |
| 18 C         | Isotropic = | 73.7090  | Anisotropy = |     |          | 123.6402 |
| XX=          | 44.1945     | YX=      | -52.7342     | ZX= | -34.6229 |          |
| XY=          | -46.3082    | YY=      | 80.5987      | ZY= | -64.9030 |          |
| XZ=          | -31.6041    | YZ=      | -67.9677     | ZZ= | 96.3338  |          |
| Eigenvalues: | -27.3551    |          | 92.3463      |     | 156.1358 |          |
| 19 C         | Isotropic = | 161.8134 | Anisotropy = |     |          | 35.5185  |
| XX=          | 154.0903    | YX=      | 4.4268       | ZX= | 6.3255   |          |
| XY=          | 4.0375      | YY=      | 173.0459     | ZY= | 15.7023  |          |
| XZ=          | 1.5569      | YZ=      | 18.8454      | ZZ= | 158.3040 |          |
| Eigenvalues: | 146.7530    |          | 153.1948     |     | 185.4924 |          |
| 20 O         | Isotropic = | 280.5432 | Anisotropy = |     |          | 52.2696  |
| XX=          | 280.5954    | YX=      | -1.7424      | ZX= | -7.4590  |          |
| XY=          | -7.1820     | YY=      | 269.7994     | ZY= | -22.9389 |          |
| XZ=          | -42.8004    | YZ=      | -16.3905     | ZZ= | 291.2350 |          |
| Eigenvalues: | 247.5546    |          | 278.6855     |     | 315.3897 |          |
| 21 H         | Isotropic = | 30.2420  | Anisotropy = |     |          | 8.5682   |
| XX=          | 25.8776     | YX=      | -0.1763      | ZX= | -0.4479  |          |
| XY=          | 0.4320      | YY=      | 33.8286      | ZY= | 3.0648   |          |
| XZ=          | -0.8319     | YZ=      | 3.3993       | ZZ= | 31.0198  |          |
| Eigenvalues: | 25.7553     |          | 29.0166      |     | 35.9541  |          |
| 22 H         | Isotropic = | 29.6526  | Anisotropy = |     |          | 6.1968   |
| XX=          | 32.8646     | YX=      | -1.0834      | ZX= | -2.0777  |          |
| XY=          | -1.1939     | YY=      | 29.7721      | ZY= | -0.1725  |          |
| XZ=          | -2.4440     | YZ=      | -0.9797      | ZZ= | 26.3211  |          |
| Eigenvalues: | 25.4296     |          | 29.7444      |     | 33.7838  |          |

|              |         |             |         |              |         |
|--------------|---------|-------------|---------|--------------|---------|
| 23           | H       | Isotropic = | 29.9864 | Anisotropy = | 5.4068  |
| XX=          | 32.2849 | YX=         | -0.3909 | ZX=          | 2.8113  |
| XY=          | -0.7942 | YY=         | 26.4791 | ZY=          | -0.4593 |
| XZ=          | 0.6901  | YZ=         | 0.8897  | ZZ=          | 31.1951 |
| Eigenvalues: | 26.3839 | 29.9842     | 33.5909 |              |         |
| 24           | H       | Isotropic = | 29.9939 | Anisotropy = | 9.8584  |
| XX=          | 27.8603 | YX=         | 1.4606  | ZX=          | -2.6284 |
| XY=          | 0.9409  | YY=         | 27.1768 | ZY=          | -1.8126 |
| XZ=          | -3.9922 | YZ=         | -0.9334 | ZZ=          | 34.9446 |
| Eigenvalues: | 26.0852 | 27.3303     | 36.5662 |              |         |
| 25           | H       | Isotropic = | 29.2603 | Anisotropy = | 7.1081  |
| XX=          | 28.6932 | YX=         | -2.3174 | ZX=          | 0.1020  |
| XY=          | -1.9893 | YY=         | 32.4964 | ZY=          | -1.2923 |
| XZ=          | -0.7176 | YZ=         | -3.2685 | ZZ=          | 26.5913 |
| Eigenvalues: | 25.4595 | 28.3223     | 33.9990 |              |         |
| 26           | H       | Isotropic = | 27.7551 | Anisotropy = | 5.6132  |
| XX=          | 28.2052 | YX=         | -0.5799 | ZX=          | -0.3442 |
| XY=          | 0.3061  | YY=         | 28.5567 | ZY=          | 2.9689  |
| XZ=          | 1.2346  | YZ=         | 4.6784  | ZZ=          | 26.5035 |
| Eigenvalues: | 23.5302 | 28.2379     | 31.4972 |              |         |
| 27           | H       | Isotropic = | 28.1052 | Anisotropy = | 3.6440  |
| XX=          | 28.5993 | YX=         | 0.2838  | ZX=          | -2.4191 |
| XY=          | 0.1410  | YY=         | 25.9512 | ZY=          | -1.4553 |
| XZ=          | 1.3639  | YZ=         | -1.8069 | ZZ=          | 29.7651 |
| Eigenvalues: | 25.3487 | 28.4324     | 30.5345 |              |         |
| 28           | H       | Isotropic = | 30.6420 | Anisotropy = | 8.7618  |
| XX=          | 27.1050 | YX=         | -0.0221 | ZX=          | 0.1977  |
| XY=          | 0.7086  | YY=         | 36.0576 | ZY=          | 2.3719  |
| XZ=          | 0.3017  | YZ=         | 1.1793  | ZZ=          | 28.7633 |
| Eigenvalues: | 27.0673 | 28.3755     | 36.4832 |              |         |
| 29           | H       | Isotropic = | 30.6961 | Anisotropy = | 9.5784  |
| XX=          | 27.9822 | YX=         | 0.8626  | ZX=          | -1.8173 |
| XY=          | 1.4786  | YY=         | 31.6523 | ZY=          | -4.7275 |
| XZ=          | -2.1415 | YZ=         | -4.1773 | ZZ=          | 32.4540 |
| Eigenvalues: | 27.0392 | 27.9675     | 37.0817 |              |         |
| 30           | H       | Isotropic = | 30.1421 | Anisotropy = | 8.1116  |
| XX=          | 32.6854 | YX=         | -2.1441 | ZX=          | 2.6189  |
| XY=          | -2.4646 | YY=         | 31.4907 | ZY=          | -1.6467 |
| XZ=          | 2.8598  | YZ=         | -1.6220 | ZZ=          | 26.2502 |
| Eigenvalues: | 25.1427 | 29.7339     | 35.5498 |              |         |
| 31           | H       | Isotropic = | 25.7545 | Anisotropy = | 6.7613  |
| XX=          | 28.7785 | YX=         | 2.2519  | ZX=          | 1.2569  |
| XY=          | 1.8662  | YY=         | 26.3084 | ZY=          | 1.1046  |
| XZ=          | 1.1676  | YZ=         | 1.1076  | ZZ=          | 22.1766 |
| Eigenvalues: | 21.8214 | 25.1801     | 30.2621 |              |         |
| 32           | H       | Isotropic = | 25.3315 | Anisotropy = | 8.0395  |
| XX=          | 30.2532 | YX=         | -1.5836 | ZX=          | 0.9914  |
| XY=          | -1.4127 | YY=         | 24.4247 | ZY=          | 0.1738  |
| XZ=          | 0.8022  | YZ=         | 0.0922  | ZZ=          | 21.3167 |
| Eigenvalues: | 21.2012 | 24.1021     | 30.6912 |              |         |
| 33           | H       | Isotropic = | 29.4287 | Anisotropy = | 8.6494  |
| XX=          | 30.6986 | YX=         | -1.4165 | ZX=          | 3.8230  |

|              |             |         |              |     |         |         |  |
|--------------|-------------|---------|--------------|-----|---------|---------|--|
| XY=          | -0.5802     | YY=     | 28.2006      | ZY= | -2.0595 |         |  |
| XZ=          | 4.8731      | YZ=     | -2.6002      | ZZ= | 29.3870 |         |  |
| Eigenvalues: | 25.1475     |         | 27.9437      |     | 35.1950 |         |  |
| 34 H         | Isotropic = | 29.4476 | Anisotropy = |     |         | 8.8350  |  |
| XX=          | 33.2445     | YX=     | -1.2540      | ZX= | -3.2693 |         |  |
| XY=          | 0.0745      | YY=     | 27.1968      | ZY= | 1.9477  |         |  |
| XZ=          | -3.9670     | YZ=     | 2.1523       | ZZ= | 27.9014 |         |  |
| Eigenvalues: | 24.9028     |         | 28.1024      |     | 35.3375 |         |  |
| 35 H         | Isotropic = | 29.9225 | Anisotropy = |     |         | 7.6309  |  |
| XX=          | 31.7978     | YX=     | 3.5214       | ZX= | 1.4759  |         |  |
| XY=          | 0.9177      | YY=     | 32.9091      | ZY= | 1.2598  |         |  |
| XZ=          | 1.0574      | YZ=     | 1.6183       | ZZ= | 25.0604 |         |  |
| Eigenvalues: | 24.6900     |         | 30.0676      |     | 35.0097 |         |  |
| 36 H         | Isotropic = | 28.1422 | Anisotropy = |     |         | 14.9614 |  |
| XX=          | 30.9962     | YX=     | -4.6447      | ZX= | 0.6275  |         |  |
| XY=          | -6.5293     | YY=     | 33.6095      | ZY= | 1.5742  |         |  |
| XZ=          | 0.3032      | YZ=     | 2.1525       | ZZ= | 19.8207 |         |  |
| Eigenvalues: | 19.4226     |         | 26.8875      |     | 38.1164 |         |  |
| 37 H         | Isotropic = | 26.5762 | Anisotropy = |     |         | 6.2223  |  |
| XX=          | 28.5282     | YX=     | 0.3618       | ZX= | -1.8763 |         |  |
| XY=          | -1.2541     | YY=     | 25.3908      | ZY= | 0.4686  |         |  |
| XZ=          | -4.5886     | YZ=     | 0.0335       | ZZ= | 25.8098 |         |  |
| Eigenvalues: | 23.6615     |         | 25.3428      |     | 30.7244 |         |  |
| 38 H         | Isotropic = | 26.5006 | Anisotropy = |     |         | 8.3303  |  |
| XX=          | 30.1390     | YX=     | -1.3820      | ZX= | -5.0258 |         |  |
| XY=          | 1.1349      | YY=     | 24.3201      | ZY= | -0.2719 |         |  |
| XZ=          | -2.3029     | YZ=     | -0.1453      | ZZ= | 25.0428 |         |  |
| Eigenvalues: | 23.0804     |         | 24.3673      |     | 32.0541 |         |  |
| 39 H         | Isotropic = | 28.9533 | Anisotropy = |     |         | 4.3110  |  |
| XX=          | 26.8973     | YX=     | 2.5432       | ZX= | 1.3316  |         |  |
| XY=          | 2.2635      | YY=     | 28.3919      | ZY= | -0.1698 |         |  |
| XZ=          | 0.5911      | YZ=     | 0.0242       | ZZ= | 31.5706 |         |  |
| Eigenvalues: | 25.0249     |         | 30.0077      |     | 31.8273 |         |  |
| 40 H         | Isotropic = | 29.8154 | Anisotropy = |     |         | 7.0417  |  |
| XX=          | 30.6894     | YX=     | -0.5598      | ZX= | 0.6146  |         |  |
| XY=          | -1.9974     | YY=     | 33.8720      | ZY= | 1.7423  |         |  |
| XZ=          | -0.4479     | YZ=     | 1.1562       | ZZ= | 24.8848 |         |  |
| Eigenvalues: | 24.6435     |         | 30.2929      |     | 34.5099 |         |  |
| 41 H         | Isotropic = | 29.7841 | Anisotropy = |     |         | 8.6785  |  |
| XX=          | 32.2841     | YX=     | 3.0925       | ZX= | -0.9696 |         |  |
| XY=          | 4.9175      | YY=     | 30.5743      | ZY= | 1.5341  |         |  |
| XZ=          | 0.1972      | YZ=     | 1.4334       | ZZ= | 26.4940 |         |  |
| Eigenvalues: | 25.4301     |         | 28.3525      |     | 35.5698 |         |  |
| 42 H         | Isotropic = | 29.8777 | Anisotropy = |     |         | 18.8943 |  |
| XX=          | 32.1514     | YX=     | 4.4699       | ZX= | -5.8041 |         |  |
| XY=          | 4.8799      | YY=     | 25.0704      | ZY= | -7.0519 |         |  |
| XZ=          | -5.7255     | YZ=     | -8.1822      | ZZ= | 32.4113 |         |  |
| Eigenvalues: | 20.1948     |         | 26.9644      |     | 42.4739 |         |  |

Number of frequencies: 120

harmonic frequencies in  $\text{cm}^{-1}$ , reduced masses in amu,

force constants in mDyne/A, and

normal modes in cartesian coordinates: 120

IR intensities in  $\text{km/mol}$

vibration # 1 2 3 4 5 6

-----

frequencies 71.52 81.35 94.56 121.71 152.20 171.97

intensities 0.30 0.34 1.46 0.75 2.79 0.84

reduc. mass 1.80 1.17 1.00 1.43 2.91 1.02

force const 0.01 0.00 0.01 0.01 0.04 0.02

vibration # 7 8 9 10 11 12

-----

frequencies 214.66 221.35 242.76 250.67 263.19 274.79

intensities 1.66 0.80 3.71 1.33 5.75 4.72

reduc. mass 0.88 0.81 1.06 0.51 1.14 3.83

force const 0.02 0.02 0.04 0.02 0.05 0.17

vibration # 13 14 15 16 17 18

-----

frequencies 292.23 297.70 321.76 328.14 332.18 351.25

intensities 1.30 0.98 0.27 1.15 2.84 5.88

reduc. mass 0.21 0.34 0.67 0.35 0.55 0.60

force const 0.01 0.02 0.04 0.02 0.04 0.04

vibration # 19 20 21 22 23 24

-----



|             |        |        |        |        |        |        |
|-------------|--------|--------|--------|--------|--------|--------|
| frequencies | 362.71 | 393.63 | 433.60 | 443.39 | 467.18 | 496.98 |
| intensities | 0.46   | 5.69   | 2.09   | 34.08  | 39.72  | 30.75  |
| reduc. mass | 0.72   | 0.55   | 0.80   | 0.46   | 0.47   | 0.59   |
| force const | 0.06   | 0.05   | 0.09   | 0.05   | 0.06   | 0.09   |

vibration #      25    26    27    28    29    30

-----

|             |        |        |        |        |        |        |
|-------------|--------|--------|--------|--------|--------|--------|
| frequencies | 510.88 | 522.90 | 526.44 | 568.45 | 588.48 | 600.67 |
| intensities | 7.00   | 17.84  | 7.41   | 12.23  | 3.75   | 8.86   |
| reduc. mass | 0.67   | 2.70   | 0.56   | 0.73   | 1.18   | 1.97   |
| force const | 0.10   | 0.43   | 0.09   | 0.14   | 0.24   | 0.42   |

vibration #      31    32    33    34    35    36

-----

|             |        |        |        |        |        |        |
|-------------|--------|--------|--------|--------|--------|--------|
| frequencies | 627.49 | 647.24 | 676.52 | 687.29 | 718.29 | 732.73 |
| intensities | 45.07  | 0.88   | 25.88  | 2.86   | 1.76   | 4.30   |
| reduc. mass | 0.57   | 0.90   | 0.85   | 1.29   | 0.37   | 0.58   |
| force const | 0.13   | 0.22   | 0.23   | 0.36   | 0.11   | 0.18   |

vibration #      37    38    39    40    41    42

-----

|             |        |        |        |        |        |        |
|-------------|--------|--------|--------|--------|--------|--------|
| frequencies | 756.07 | 803.93 | 825.66 | 842.40 | 867.45 | 887.80 |
| intensities | 0.34   | 3.80   | 2.97   | 0.88   | 37.38  | 12.09  |
| reduc. mass | 2.18   | 0.86   | 0.76   | 2.42   | 0.56   | 0.97   |
| force const | 0.73   | 0.33   | 0.31   | 1.01   | 0.25   | 0.45   |

vibration #      43    44    45    46    47    48

-----

|             |        |        |        |        |         |         |
|-------------|--------|--------|--------|--------|---------|---------|
| frequencies | 906.59 | 933.48 | 951.21 | 990.49 | 1005.64 | 1010.73 |
|-------------|--------|--------|--------|--------|---------|---------|

|             |      |      |       |      |      |       |
|-------------|------|------|-------|------|------|-------|
| intensities | 6.76 | 1.86 | 14.47 | 0.54 | 4.09 | 23.29 |
| reduc. mass | 0.63 | 1.47 | 0.33  | 0.37 | 0.35 | 0.27  |
| force const | 0.30 | 0.76 | 0.18  | 0.21 | 0.21 | 0.16  |

vibration #      49    50    51    52    53    54

-----

|             |         |         |         |         |         |         |
|-------------|---------|---------|---------|---------|---------|---------|
| frequencies | 1030.34 | 1035.86 | 1053.27 | 1067.27 | 1086.07 | 1099.70 |
| intensities | 29.40   | 8.54    | 1.46    | 48.52   | 69.75   | 2.34    |
| reduc. mass | 0.31    | 0.28    | 0.27    | 0.61    | 0.46    | 0.66    |
| force const | 0.19    | 0.18    | 0.17    | 0.41    | 0.32    | 0.47    |

vibration #      55    56    57    58    59    60

-----

|             |         |         |         |         |         |         |
|-------------|---------|---------|---------|---------|---------|---------|
| frequencies | 1103.14 | 1111.59 | 1144.87 | 1180.81 | 1186.20 | 1211.26 |
| intensities | 15.67   | 47.06   | 10.77   | 39.89   | 4.62    | 62.66   |
| reduc. mass | 0.39    | 1.02    | 0.36    | 0.83    | 0.51    | 0.35    |
| force const | 0.28    | 0.74    | 0.27    | 0.68    | 0.42    | 0.30    |

vibration #      61    62    63    64    65    66

-----

|             |         |         |         |         |         |         |
|-------------|---------|---------|---------|---------|---------|---------|
| frequencies | 1231.66 | 1239.85 | 1250.19 | 1258.94 | 1314.86 | 1329.14 |
| intensities | 11.91   | 31.84   | 88.95   | 3.64    | 12.07   | 148.06  |
| reduc. mass | 0.53    | 0.38    | 0.86    | 0.33    | 1.84    | 0.38    |
| force const | 0.47    | 0.34    | 0.79    | 0.31    | 1.88    | 0.40    |

vibration #      67    68    69    70    71    72

-----

|             |         |         |         |         |         |         |
|-------------|---------|---------|---------|---------|---------|---------|
| frequencies | 1335.99 | 1376.61 | 1406.99 | 1435.81 | 1458.39 | 1479.62 |
| intensities | 21.42   | 34.68   | 40.36   | 731.75  | 67.98   | 35.78   |

|             |      |      |      |      |      |      |
|-------------|------|------|------|------|------|------|
| reduc. mass | 0.62 | 0.50 | 0.42 | 0.63 | 0.49 | 0.80 |
| force const | 0.65 | 0.56 | 0.49 | 0.77 | 0.62 | 1.03 |

vibration #      73    74    75    76    77    78

-----

|             |         |         |         |         |         |         |
|-------------|---------|---------|---------|---------|---------|---------|
| frequencies | 1484.70 | 1507.78 | 1515.79 | 1523.19 | 1526.13 | 1551.48 |
| intensities | 34.95   | 0.64    | 139.98  | 43.49   | 39.08   | 4.70    |
| reduc. mass | 0.88    | 0.72    | 1.57    | 0.46    | 2.78    | 0.71    |
| force const | 1.15    | 0.97    | 2.12    | 0.63    | 3.82    | 1.01    |

vibration #      79    80    81    82    83    84

-----

|             |         |         |         |         |         |         |
|-------------|---------|---------|---------|---------|---------|---------|
| frequencies | 1566.18 | 1577.91 | 1580.14 | 1605.08 | 1626.73 | 1630.18 |
| intensities | 10.45   | 51.20   | 10.03   | 33.90   | 0.86    | 149.49  |
| reduc. mass | 0.98    | 1.25    | 0.62    | 0.68    | 0.88    | 0.41    |
| force const | 1.42    | 1.84    | 0.91    | 1.04    | 1.37    | 0.65    |

vibration #      85    86    87    88    89    90

-----

|             |         |         |         |         |         |         |
|-------------|---------|---------|---------|---------|---------|---------|
| frequencies | 1643.35 | 1653.10 | 1657.19 | 1660.63 | 1662.54 | 1664.08 |
| intensities | 12.17   | 16.73   | 27.25   | 11.02   | 24.78   | 8.66    |
| reduc. mass | 0.61    | 0.20    | 0.49    | 0.36    | 0.17    | 0.27    |
| force const | 0.98    | 0.33    | 0.80    | 0.58    | 0.28    | 0.44    |

vibration #      91    92    93    94    95    96

-----

|             |         |         |         |         |         |         |
|-------------|---------|---------|---------|---------|---------|---------|
| frequencies | 1666.33 | 1671.39 | 1679.05 | 1679.79 | 1686.08 | 1799.71 |
| intensities | 26.46   | 40.27   | 4.37    | 3.70    | 39.65   | 1294.97 |
| reduc. mass | 0.26    | 0.24    | 0.37    | 0.38    | 1.38    | 1.40    |

force const 0.43 0.39 0.61 0.64 2.32 2.67

vibration # 97 98 99 100 101 102

-----

frequencies 1835.21 1890.45 3022.95 3027.75 3029.50 3058.93

intensities 291.59 19.56 274.35 668.08 537.26 366.93

reduc. mass 1.30 0.84 0.33 0.18 0.18 0.44

force const 2.58 1.78 1.78 0.98 0.98 2.42

vibration # 103 104 105 106 107 108

-----

frequencies 3067.30 3072.14 3089.37 3100.41 3108.26 3125.58

intensities 399.32 119.87 336.70 589.37 217.80 402.01

reduc. mass 0.37 0.78 0.92 0.46 0.87 0.41

force const 2.04 4.36 5.17 2.59 4.95 2.38

vibration # 109 110 111 112 113 114

-----

frequencies 3131.00 3134.26 3135.30 3137.62 3144.44 3147.39

intensities 258.96 378.94 354.00 407.92 366.59 382.46

reduc. mass 0.46 0.33 0.40 0.84 0.54 0.51

force const 2.63 1.91 2.33 4.84 3.14 3.00

vibration # 115 116 117 118 119 120

-----

frequencies 3148.30 3153.40 3156.96 3203.76 3823.46 3860.28

intensities 482.35 300.81 285.25 368.42 27.31 34.34

reduc. mass 0.55 0.57 0.86 0.56 0.95 0.95

force const 3.22 3.35 5.07 3.40 8.15 8.32

Number of imaginary frequencies: 0

#### Conformation 4

Boltzmann Population = 1.1% (relative energy = 2.28 kcal/mol)

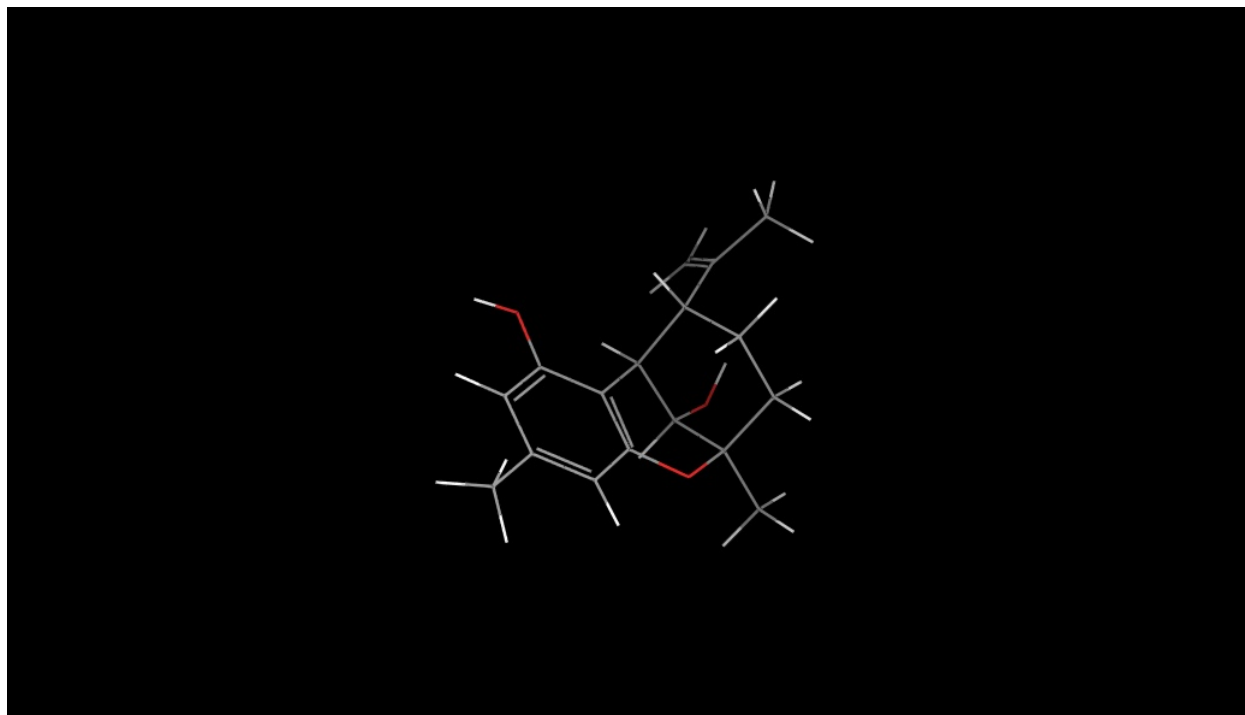

Geometries and Energy Method: M06-2X-D3/6-31G(d,p)

NMR Method: mPW1PW91/6-311+G(2d,p)

Thermodynamic properties for P = 1.00 atm, calculated at 1 temperatures

T = 298.15 K, P = 1.00 atm

Total internal energy,  $U_{\text{tot}}(\text{SCFE} + \text{ZPE} + U)$ : -885.983272 hartrees

Total enthalpy,  $H_{\text{tot}}(U_{\text{tot}} + pV)$ : -885.982328 hartrees

Total Gibbs free energy,  $G_{\text{tot}}(H_{\text{tot}} - T^*S)$ : -886.042720 hartrees

Optimized Geometry:

| Center<br>Number | Atomic<br>Number | Atomic<br>Type | Coordinates (Angstroms) |           |          |
|------------------|------------------|----------------|-------------------------|-----------|----------|
|                  |                  |                | X                       | Y         | Z        |
| 1                | 6                | 0              | -1.443800               | -2.006400 | 4.716000 |
| 2                | 6                | 0              | -1.138000               | -1.863600 | 3.224100 |
| 3                | 6                | 0              | -2.366500               | -1.405100 | 2.408500 |

|    |   |   |           |           |          |
|----|---|---|-----------|-----------|----------|
| 4  | 6 | 0 | -2.976600 | -0.142600 | 3.077400 |
| 5  | 6 | 0 | -3.320500 | -0.342100 | 4.562600 |
| 6  | 6 | 0 | -2.032400 | -0.720900 | 5.313600 |
| 7  | 6 | 0 | -2.285900 | -0.864500 | 6.803500 |
| 8  | 6 | 0 | -3.349200 | -2.527400 | 2.083300 |
| 9  | 6 | 0 | -1.964900 | 0.977600  | 3.040500 |
| 10 | 6 | 0 | -1.078400 | 1.159100  | 4.103400 |
| 11 | 8 | 0 | -1.067800 | 0.346400  | 5.194400 |
| 12 | 6 | 0 | -1.861300 | 1.848400  | 1.952500 |
| 13 | 6 | 0 | -0.927100 | 2.878100  | 1.930900 |
| 14 | 6 | 0 | -0.056800 | 3.052900  | 3.010400 |
| 15 | 6 | 0 | -0.136100 | 2.190600  | 4.096300 |
| 16 | 6 | 0 | 0.980900  | 4.145900  | 2.974200 |
| 17 | 8 | 0 | -2.721800 | 1.623400  | 0.917300 |
| 18 | 6 | 0 | -4.678100 | -2.378900 | 2.053200 |
| 19 | 6 | 0 | -2.731600 | -3.837200 | 1.658000 |
| 20 | 8 | 0 | -4.343900 | -1.272900 | 4.831400 |
| 21 | 1 | 0 | -0.534300 | -2.264600 | 5.268300 |
| 22 | 1 | 0 | -2.162900 | -2.819200 | 4.887300 |
| 23 | 1 | 0 | -0.344500 | -1.120900 | 3.098000 |
| 24 | 1 | 0 | -0.737500 | -2.800700 | 2.829500 |
| 25 | 1 | 0 | -1.991300 | -1.078800 | 1.426500 |
| 26 | 1 | 0 | -3.865700 | 0.176900  | 2.526500 |
| 27 | 1 | 0 | -3.672500 | 0.616700  | 4.963400 |
| 28 | 1 | 0 | -1.352000 | -1.101300 | 7.320300 |
| 29 | 1 | 0 | -2.677600 | 0.073500  | 7.205700 |
| 30 | 1 | 0 | -3.015600 | -1.655200 | 6.982700 |
| 31 | 1 | 0 | -0.873200 | 3.544200  | 1.072600 |
| 32 | 1 | 0 | 0.524900  | 2.293200  | 4.950100 |
| 33 | 1 | 0 | 0.609500  | 5.027100  | 2.445200 |
| 34 | 1 | 0 | 1.270500  | 4.447900  | 3.982900 |
| 35 | 1 | 0 | 1.883900  | 3.806100  | 2.456800 |
| 36 | 1 | 0 | -2.577300 | 2.290500  | 0.237300 |
| 37 | 1 | 0 | -5.316300 | -3.195300 | 1.729000 |
| 38 | 1 | 0 | -5.176500 | -1.460100 | 2.340900 |
| 39 | 1 | 0 | -2.264100 | -4.353600 | 2.503100 |
| 40 | 1 | 0 | -1.946300 | -3.672600 | 0.911600 |
| 41 | 1 | 0 | -3.482700 | -4.502700 | 1.228600 |
| 42 | 1 | 0 | -4.241800 | -2.029000 | 4.239400 |

-----

SCF GIAO Magnetic shielding tensor (ppm):

|              |   |             |          |                   |          |
|--------------|---|-------------|----------|-------------------|----------|
| 1            | C | Isotropic = | 155.4920 | Anisotropy =      | 26.9860  |
| XX=          |   |             | 148.9628 | YX=               | 4.7711   |
|              |   |             |          | ZX=               | -8.0840  |
| XY=          |   |             | 4.3788   | YY=               | 160.0291 |
|              |   |             |          | ZY=               | -5.6471  |
| XZ=          |   |             | -12.9033 | YZ=               | -14.5199 |
|              |   |             |          | <td>157.4842</td> | 157.4842 |
| Eigenvalues: |   |             | 141.6420 | 151.3513          | 173.4827 |
| 2            | C | Isotropic = | 164.6721 | Anisotropy =      | 16.0160  |
| XX=          |   |             | 157.3596 | YX=               | -0.3521  |
|              |   |             |          | ZX=               | -2.4693  |

|              |             |          |              |     |          |          |
|--------------|-------------|----------|--------------|-----|----------|----------|
| XY=          | 0.6313      | YY=      | 174.1885     | ZY= | 4.3621   |          |
| XZ=          | -2.8816     | YZ=      | 3.2897       | ZZ= | 162.4682 |          |
| Eigenvalues: | 156.0537    |          | 162.6131     |     | 175.3494 |          |
| 3 C          | Isotropic = | 140.7349 | Anisotropy = |     |          | 30.1772  |
| XX=          | 158.8250    | YX=      | 4.3255       | ZX= | -0.8354  |          |
| XY=          | 3.8651      | YY=      | 138.8942     | ZY= | -7.9000  |          |
| XZ=          | -11.2420    | YZ=      | 0.5563       | ZZ= | 124.4856 |          |
| Eigenvalues: | 122.8974    |          | 138.4543     |     | 160.8531 |          |
| 4 C          | Isotropic = | 152.3693 | Anisotropy = |     |          | 19.2733  |
| XX=          | 151.3940    | YX=      | 1.2376       | ZX= | -2.0762  |          |
| XY=          | -6.6425     | YY=      | 144.4085     | ZY= | -12.0656 |          |
| XZ=          | 2.0713      | YZ=      | -5.7516      | ZZ= | 161.3055 |          |
| Eigenvalues: | 140.0342    |          | 151.8557     |     | 165.2182 |          |
| 5 C          | Isotropic = | 111.8397 | Anisotropy = |     |          | 43.8982  |
| XX=          | 140.5089    | YX=      | 6.5530       | ZX= | 10.7980  |          |
| XY=          | -0.5615     | YY=      | 102.2793     | ZY= | -1.3851  |          |
| XZ=          | -2.3364     | YZ=      | 0.6481       | ZZ= | 92.7308  |          |
| Eigenvalues: | 92.3186     |          | 102.0952     |     | 141.1051 |          |
| 6 C          | Isotropic = | 107.9128 | Anisotropy = |     |          | 66.0938  |
| XX=          | 145.3636    | YX=      | -4.1959      | ZX= | 17.4170  |          |
| XY=          | 5.1868      | YY=      | 85.2028      | ZY= | -6.1711  |          |
| XZ=          | 21.8424     | YZ=      | -8.5987      | ZZ= | 93.1721  |          |
| Eigenvalues: | 78.6859     |          | 93.0773      |     | 151.9753 |          |
| 7 C          | Isotropic = | 160.3708 | Anisotropy = |     |          | 41.4624  |
| XX=          | 146.7106    | YX=      | -6.2314      | ZX= | -0.8305  |          |
| XY=          | -5.9307     | YY=      | 181.3815     | ZY= | -16.1145 |          |
| XZ=          | -1.6087     | YZ=      | -12.5637     | ZZ= | 153.0203 |          |
| Eigenvalues: | 143.0753    |          | 150.0247     |     | 188.0124 |          |
| 8 C          | Isotropic = | 27.6104  | Anisotropy = |     |          | 188.8960 |
| XX=          | -40.6790    | YX=      | -65.6497     | ZX= | 45.4978  |          |
| XY=          | -71.0341    | YY=      | 128.8668     | ZY= | 8.4391   |          |
| XZ=          | 48.6656     | YZ=      | 5.4743       | ZZ= | -5.3565  |          |
| Eigenvalues: | -90.5216    |          | 19.8117      |     | 153.5411 |          |
| 9 C          | Isotropic = | 72.9853  | Anisotropy = |     |          | 127.7962 |
| XX=          | 28.0446     | YX=      | 4.1316       | ZX= | -28.0798 |          |
| XY=          | 5.2389      | YY=      | 46.4003      | ZY= | -33.8013 |          |
| XZ=          | -19.8390    | YZ=      | -28.7735     | ZZ= | 144.5109 |          |
| Eigenvalues: | 23.1669     |          | 37.6061      |     | 158.1827 |          |
| 10 C         | Isotropic = | 24.2315  | Anisotropy = |     |          | 139.0804 |
| XX=          | -10.1831    | YX=      | 41.2969      | ZX= | -13.7261 |          |
| XY=          | 48.4109     | YY=      | -19.5738     | ZY= | -32.3747 |          |
| XZ=          | -14.5005    | YZ=      | -36.6888     | ZZ= | 102.4512 |          |
| Eigenvalues: | -61.7078    |          | 17.4504      |     | 116.9517 |          |
| 11 O         | Isotropic = | 171.5023 | Anisotropy = |     |          | 68.3043  |
| XX=          | 122.8886    | YX=      | 2.6832       | ZX= | -21.4704 |          |
| XY=          | -27.4572    | YY=      | 190.0801     | ZY= | -7.2861  |          |
| XZ=          | -16.7355    | YZ=      | -32.0585     | ZZ= | 201.5382 |          |
| Eigenvalues: | 114.7417    |          | 182.7267     |     | 217.0385 |          |
| 12 C         | Isotropic = | 29.4368  | Anisotropy = |     |          | 130.7373 |
| XX=          | 21.3392     | YX=      | -24.1879     | ZX= | -26.0195 |          |
| XY=          | -15.2703    | YY=      | -34.5768     | ZY= | -42.5520 |          |
| XZ=          | -21.0570    | YZ=      | -40.8916     | ZZ= | 101.5480 |          |



|              |             |          |              |          |          |
|--------------|-------------|----------|--------------|----------|----------|
| Eigenvalues: | -54.9866    | 26.7020  | 116.5950     |          |          |
| 13 C         | Isotropic = | 80.3721  | Anisotropy = | 98.5397  |          |
| XX=          | 65.1044     | YX=      | 39.5627      | ZX=      | -6.7154  |
| XY=          | 47.0847     | YY=      | 39.1203      | ZY=      | -20.0031 |
| XZ=          | -11.0694    | YZ=      | -22.8855     | ZZ=      | 136.8916 |
| Eigenvalues: | 5.7664      | 89.2846  | 146.0652     |          |          |
| 14 C         | Isotropic = | 43.2983  | Anisotropy = | 193.4997 |          |
| XX=          | -44.9028    | YX=      | -1.5187      | ZX=      | -46.6422 |
| XY=          | -2.3719     | YY=      | 22.4891      | ZY=      | -42.3684 |
| XZ=          | -40.2433    | YZ=      | -40.6951     | ZZ=      | 152.3085 |
| Eigenvalues: | -55.5975    | 13.1942  | 172.2981     |          |          |
| 15 C         | Isotropic = | 75.2934  | Anisotropy = | 115.9933 |          |
| XX=          | 69.6783     | YX=      | -19.2119     | ZX=      | -23.2852 |
| XY=          | -22.9123    | YY=      | 21.6565      | ZY=      | -41.5129 |
| XZ=          | -31.6568    | YZ=      | -39.6058     | ZZ=      | 134.5453 |
| Eigenvalues: | -2.9708     | 76.2287  | 152.6222     |          |          |
| 16 C         | Isotropic = | 164.3762 | Anisotropy = | 40.9340  |          |
| XX=          | 189.4307    | YX=      | 4.1558       | ZX=      | 5.1261   |
| XY=          | 0.9342      | YY=      | 157.2259     | ZY=      | 3.8572   |
| XZ=          | 13.2823     | YZ=      | 5.4963       | ZZ=      | 146.4719 |
| Eigenvalues: | 143.3663    | 158.0967 | 191.6655     |          |          |
| 17 O         | Isotropic = | 216.0244 | Anisotropy = | 48.9963  |          |
| XX=          | 179.3156    | YX=      | 10.8728      | ZX=      | -6.5440  |
| XY=          | 35.7356     | YY=      | 230.7464     | ZY=      | 7.0507   |
| XZ=          | -2.3105     | YZ=      | 16.4304      | ZZ=      | 238.0111 |
| Eigenvalues: | 169.2923    | 230.0923 | 248.6886     |          |          |
| 18 C         | Isotropic = | 67.8716  | Anisotropy = | 131.1258 |          |
| XX=          | -1.9973     | YX=      | -52.9785     | ZX=      | 44.2069  |
| XY=          | -47.3431    | YY=      | 139.1526     | ZY=      | 11.7094  |
| XZ=          | 43.3225     | YZ=      | 9.6723       | ZZ=      | 66.4595  |
| Eigenvalues: | -37.4547    | 85.7807  | 155.2888     |          |          |
| 19 C         | Isotropic = | 161.2365 | Anisotropy = | 33.7588  |          |
| XX=          | 163.5989    | YX=      | 7.2060       | ZX=      | -14.6425 |
| XY=          | 8.1067      | YY=      | 149.5526     | ZY=      | -7.0101  |
| XZ=          | -11.1695    | YZ=      | -7.9785      | ZZ=      | 170.5579 |
| Eigenvalues: | 145.9891    | 153.9779 | 183.7423     |          |          |
| 20 O         | Isotropic = | 267.7643 | Anisotropy = | 70.8291  |          |
| XX=          | 248.8809    | YX=      | 17.1457      | ZX=      | -9.5893  |
| XY=          | 16.4298     | YY=      | 283.1452     | ZY=      | -28.0005 |
| XZ=          | -35.3135    | YZ=      | -23.6900     | ZZ=      | 271.2669 |
| Eigenvalues: | 234.9715    | 253.3378 | 314.9837     |          |          |
| 21 H         | Isotropic = | 30.3465  | Anisotropy = | 8.9291   |          |
| XX=          | 25.8051     | YX=      | -0.5845      | ZX=      | -1.3185  |
| XY=          | 0.1143      | YY=      | 33.6504      | ZY=      | 3.2667   |
| XZ=          | -1.3742     | YZ=      | 3.6035       | ZZ=      | 31.5841  |
| Eigenvalues: | 25.4655     | 29.2749  | 36.2992      |          |          |
| 22 H         | Isotropic = | 30.0607  | Anisotropy = | 5.7597   |          |
| XX=          | 33.1212     | YX=      | -1.3278      | ZX=      | -1.4788  |
| XY=          | -1.2683     | YY=      | 29.7527      | ZY=      | -0.3488  |
| XZ=          | -1.8759     | YZ=      | -0.3723      | ZZ=      | 27.3080  |
| Eigenvalues: | 26.6952     | 29.5863  | 33.9005      |          |          |
| 23 H         | Isotropic = | 29.9515  | Anisotropy = | 4.9921   |          |

|              |             |         |              |     |         |        |  |
|--------------|-------------|---------|--------------|-----|---------|--------|--|
| XX=          | 32.3878     | YX=     | -0.3397      | ZX= | 2.5810  |        |  |
| XY=          | 0.2010      | YY=     | 26.2708      | ZY= | -0.9841 |        |  |
| XZ=          | 0.1241      | YZ=     | 0.2417       | ZZ= | 31.1959 |        |  |
| Eigenvalues: | 26.2428     |         | 30.3321      |     | 33.2796 |        |  |
| 24 H         | Isotropic = | 30.0438 | Anisotropy = |     |         | 9.4946 |  |
| XX=          | 28.2223     | YX=     | 3.0541       | ZX= | -2.8384 |        |  |
| XY=          | 3.1162      | YY=     | 28.3805      | ZY= | -1.4474 |        |  |
| XZ=          | -4.2540     | YZ=     | -1.8306      | ZZ= | 33.5288 |        |  |
| Eigenvalues: | 24.9180     |         | 28.8399      |     | 36.3736 |        |  |
| 25 H         | Isotropic = | 29.1899 | Anisotropy = |     |         | 7.0163 |  |
| XX=          | 29.5824     | YX=     | -2.3135      | ZX= | 0.0038  |        |  |
| XY=          | -2.3281     | YY=     | 32.3748      | ZY= | -1.6044 |        |  |
| XZ=          | -2.6766     | YZ=     | -2.5619      | ZZ= | 25.6126 |        |  |
| Eigenvalues: | 24.2725     |         | 29.4298      |     | 33.8675 |        |  |
| 26 H         | Isotropic = | 27.5273 | Anisotropy = |     |         | 6.6930 |  |
| XX=          | 27.7193     | YX=     | -1.4510      | ZX= | -0.4300 |        |  |
| XY=          | -1.5361     | YY=     | 27.3233      | ZY= | 4.0317  |        |  |
| XZ=          | 1.7220      | YZ=     | 4.9135       | ZZ= | 27.5394 |        |  |
| Eigenvalues: | 22.5108     |         | 28.0818      |     | 31.9893 |        |  |
| 27 H         | Isotropic = | 28.0474 | Anisotropy = |     |         | 3.4241 |  |
| XX=          | 28.6697     | YX=     | 0.2744       | ZX= | -2.2009 |        |  |
| XY=          | -0.1923     | YY=     | 25.9550      | ZY= | -1.5807 |        |  |
| XZ=          | 1.5847      | YZ=     | -2.0399      | ZZ= | 29.5174 |        |  |
| Eigenvalues: | 25.1947     |         | 28.6173      |     | 30.3301 |        |  |
| 28 H         | Isotropic = | 30.6887 | Anisotropy = |     |         | 8.8114 |  |
| XX=          | 27.1678     | YX=     | 0.1698       | ZX= | 0.2087  |        |  |
| XY=          | 0.8537      | YY=     | 35.6493      | ZY= | 3.1133  |        |  |
| XZ=          | 0.3673      | YZ=     | 1.9429       | ZZ= | 29.2489 |        |  |
| Eigenvalues: | 27.1236     |         | 28.3795      |     | 36.5630 |        |  |
| 29 H         | Isotropic = | 30.7029 | Anisotropy = |     |         | 9.4818 |  |
| XX=          | 28.2535     | YX=     | 1.3234       | ZX= | -2.0107 |        |  |
| XY=          | 2.0606      | YY=     | 32.4615      | ZY= | -4.5089 |        |  |
| XZ=          | -2.2387     | YZ=     | -3.9817      | ZZ= | 31.3938 |        |  |
| Eigenvalues: | 27.0771     |         | 28.0076      |     | 37.0241 |        |  |
| 30 H         | Isotropic = | 30.1110 | Anisotropy = |     |         | 8.1887 |  |
| XX=          | 32.2168     | YX=     | -2.4437      | ZX= | 2.7182  |        |  |
| XY=          | -2.7310     | YY=     | 31.8923      | ZY= | -1.2855 |        |  |
| XZ=          | 2.9005      | YZ=     | -1.2369      | ZZ= | 26.2238 |        |  |
| Eigenvalues: | 25.1043     |         | 29.6585      |     | 35.5701 |        |  |
| 31 H         | Isotropic = | 25.7749 | Anisotropy = |     |         | 6.5311 |  |
| XX=          | 28.7478     | YX=     | 1.7572       | ZX= | 1.6292  |        |  |
| XY=          | 1.5134      | YY=     | 25.8104      | ZY= | 1.6647  |        |  |
| XZ=          | 1.4741      | YZ=     | 1.9787       | ZZ= | 22.7664 |        |  |
| Eigenvalues: | 21.8295     |         | 25.3662      |     | 30.1289 |        |  |
| 32 H         | Isotropic = | 25.3063 | Anisotropy = |     |         | 8.2557 |  |
| XX=          | 30.2461     | YX=     | -1.8522      | ZX= | 1.0889  |        |  |
| XY=          | -1.5818     | YY=     | 24.3973      | ZY= | 0.3871  |        |  |
| XZ=          | 1.0015      | YZ=     | -0.0231      | ZZ= | 21.2754 |        |  |
| Eigenvalues: | 21.1076     |         | 24.0012      |     | 30.8101 |        |  |
| 33 H         | Isotropic = | 29.7542 | Anisotropy = |     |         | 8.3404 |  |
| XX=          | 33.6862     | YX=     | -2.9161      | ZX= | -2.1292 |        |  |
| XY=          | -0.8490     | YY=     | 28.7653      | ZY= | 2.9504  |        |  |

|              |             |         |              |         |         |  |
|--------------|-------------|---------|--------------|---------|---------|--|
| XZ=          | -1.8494     | YZ=     | 2.7563       | ZZ=     | 26.8112 |  |
| Eigenvalues: | 24.7369     |         | 29.2113      |         | 35.3145 |  |
| 34 H         | Isotropic = | 29.7350 | Anisotropy = | 7.8093  |         |  |
| XX=          | 32.1367     | YX=     | 3.7439       | ZX=     | 0.7273  |  |
| XY=          | 1.5552      | YY=     | 32.4259      | ZY=     | -0.1111 |  |
| XZ=          | -0.0089     | YZ=     | 0.1349       | ZZ=     | 24.6424 |  |
| Eigenvalues: | 24.6233     |         | 29.6405      |         | 34.9412 |  |
| 35 H         | Isotropic = | 29.3575 | Anisotropy = | 8.8574  |         |  |
| XX=          | 29.8059     | YX=     | -0.7230      | ZX=     | 3.5991  |  |
| XY=          | -0.9260     | YY=     | 26.5999      | ZY=     | -1.2162 |  |
| XZ=          | 4.7738      | YZ=     | -1.1383      | ZZ=     | 31.6668 |  |
| Eigenvalues: | 26.3035     |         | 26.5067      |         | 35.2624 |  |
| 36 H         | Isotropic = | 28.1767 | Anisotropy = | 14.9798 |         |  |
| XX=          | 30.7272     | YX=     | -4.6871      | ZX=     | 0.3318  |  |
| XY=          | -6.7367     | YY=     | 33.1669      | ZY=     | 2.9852  |  |
| XZ=          | -0.2660     | YZ=     | 3.5984       | ZZ=     | 20.6359 |  |
| Eigenvalues: | 19.6057     |         | 26.7611      |         | 38.1632 |  |
| 37 H         | Isotropic = | 26.2992 | Anisotropy = | 5.4914  |         |  |
| XX=          | 24.9289     | YX=     | 0.9923       | ZX=     | 0.6904  |  |
| XY=          | 1.9072      | YY=     | 26.1759      | ZY=     | 1.2340  |  |
| XZ=          | 3.4492      | YZ=     | 1.7827       | ZZ=     | 27.7927 |  |
| Eigenvalues: | 23.6497     |         | 25.2877      |         | 29.9601 |  |
| 38 H         | Isotropic = | 25.7522 | Anisotropy = | 7.4919  |         |  |
| XX=          | 25.3156     | YX=     | 2.6039       | ZX=     | 5.4387  |  |
| XY=          | 1.6324      | YY=     | 26.2881      | ZY=     | 2.3736  |  |
| XZ=          | 1.3930      | YZ=     | 1.5043       | ZZ=     | 25.6528 |  |
| Eigenvalues: | 22.0514     |         | 24.4584      |         | 30.7468 |  |
| 39 H         | Isotropic = | 29.7372 | Anisotropy = | 6.2680  |         |  |
| XX=          | 30.3704     | YX=     | 0.0250       | ZX=     | -3.7906 |  |
| XY=          | 0.5199      | YY=     | 29.9159      | ZY=     | 2.7570  |  |
| XZ=          | -3.3729     | YZ=     | 2.4668       | ZZ=     | 28.9255 |  |
| Eigenvalues: | 24.9693     |         | 30.3265      |         | 33.9159 |  |
| 40 H         | Isotropic = | 30.1442 | Anisotropy = | 7.8644  |         |  |
| XX=          | 28.9495     | YX=     | 1.0088       | ZX=     | -0.3094 |  |
| XY=          | 1.0643      | YY=     | 29.8065      | ZY=     | -4.9145 |  |
| XZ=          | 0.5047      | YZ=     | -4.0790      | ZZ=     | 31.6766 |  |
| Eigenvalues: | 25.8999     |         | 29.1455      |         | 35.3872 |  |
| 41 H         | Isotropic = | 29.8861 | Anisotropy = | 8.3948  |         |  |
| XX=          | 32.7892     | YX=     | 4.1995       | ZX=     | 0.3454  |  |
| XY=          | 4.3937      | YY=     | 28.2856      | ZY=     | 0.2158  |  |
| XZ=          | -1.9563     | YZ=     | -0.6685      | ZZ=     | 28.5834 |  |
| Eigenvalues: | 25.6690     |         | 28.5066      |         | 35.4826 |  |
| 42 H         | Isotropic = | 29.8911 | Anisotropy = | 19.6497 |         |  |
| XX=          | 32.8488     | YX=     | 7.1262       | ZX=     | -2.4352 |  |
| XY=          | 8.0791      | YY=     | 30.5681      | ZY=     | -7.9004 |  |
| XZ=          | -3.2158     | YZ=     | -8.5735      | ZZ=     | 26.2564 |  |
| Eigenvalues: | 19.3242     |         | 27.3582      |         | 42.9909 |  |

Number of frequencies: 120

harmonic frequencies in cm<sup>-1</sup>, reduced masses in amu,

force constants in mDyne/A, and

normal modes in cartesian coordinates: 120

IR intensities in km/mol

vibration # 1 2 3 4 5 6

-----

frequencies 71.00 82.16 90.56 134.54 153.97 180.60

intensities 0.63 0.07 1.07 1.54 0.51 1.69

reduc. mass 1.84 1.60 0.75 2.22 1.49 0.88

force const 0.01 0.01 0.00 0.02 0.02 0.02

vibration # 7 8 9 10 11 12

-----

frequencies 214.54 217.75 236.95 254.16 264.39 288.66

intensities 0.02 2.49 2.17 0.84 5.35 1.10

reduc. mass 0.63 0.82 0.90 0.87 0.91 0.93

force const 0.02 0.02 0.03 0.03 0.04 0.05

vibration # 13 14 15 16 17 18

-----

frequencies 296.01 304.09 319.27 326.66 336.28 347.96

intensities 0.57 0.89 1.51 0.78 2.07 3.16

reduc. mass 2.78 0.23 0.54 0.40 0.49 0.57

force const 0.14 0.01 0.03 0.03 0.03 0.04

vibration # 19 20 21 22 23 24

-----

frequencies 376.13 423.70 424.57 461.57 484.75 490.67

intensities 0.10 9.84 5.17 2.28 9.81 0.44

|             |      |      |      |      |      |      |
|-------------|------|------|------|------|------|------|
| reduc. mass | 0.78 | 0.56 | 1.00 | 1.16 | 0.71 | 0.67 |
| force const | 0.06 | 0.06 | 0.11 | 0.15 | 0.10 | 0.09 |

|             |    |    |    |    |    |    |
|-------------|----|----|----|----|----|----|
| vibration # | 25 | 26 | 27 | 28 | 29 | 30 |
|-------------|----|----|----|----|----|----|

-----

|             |        |        |        |        |        |        |
|-------------|--------|--------|--------|--------|--------|--------|
| frequencies | 521.40 | 533.17 | 557.82 | 564.75 | 600.39 | 612.98 |
| intensities | 10.87  | 19.06  | 8.35   | 2.10   | 10.68  | 6.85   |
| reduc. mass | 2.50   | 0.58   | 0.52   | 0.50   | 1.31   | 0.96   |
| force const | 0.40   | 0.10   | 0.10   | 0.09   | 0.28   | 0.21   |

|             |    |    |    |    |    |    |
|-------------|----|----|----|----|----|----|
| vibration # | 31 | 32 | 33 | 34 | 35 | 36 |
|-------------|----|----|----|----|----|----|

-----

|             |        |        |        |        |        |        |
|-------------|--------|--------|--------|--------|--------|--------|
| frequencies | 630.54 | 660.01 | 677.46 | 697.38 | 723.39 | 730.59 |
| intensities | 23.61  | 108.07 | 10.22  | 15.86  | 3.08   | 8.93   |
| reduc. mass | 0.54   | 0.39   | 0.67   | 1.03   | 0.54   | 1.02   |
| force const | 0.13   | 0.10   | 0.18   | 0.29   | 0.17   | 0.32   |

|             |    |    |    |    |    |    |
|-------------|----|----|----|----|----|----|
| vibration # | 37 | 38 | 39 | 40 | 41 | 42 |
|-------------|----|----|----|----|----|----|

-----

|             |        |        |        |        |        |        |
|-------------|--------|--------|--------|--------|--------|--------|
| frequencies | 745.43 | 795.84 | 827.25 | 843.81 | 868.01 | 892.35 |
| intensities | 3.58   | 2.66   | 3.97   | 0.07   | 36.43  | 3.16   |
| reduc. mass | 0.25   | 0.60   | 0.98   | 3.18   | 0.55   | 0.54   |
| force const | 0.08   | 0.22   | 0.39   | 1.34   | 0.24   | 0.25   |

|             |    |    |    |    |    |    |
|-------------|----|----|----|----|----|----|
| vibration # | 43 | 44 | 45 | 46 | 47 | 48 |
|-------------|----|----|----|----|----|----|

-----

|             |        |        |        |        |         |         |
|-------------|--------|--------|--------|--------|---------|---------|
| frequencies | 908.50 | 933.50 | 958.66 | 992.67 | 1010.16 | 1013.65 |
| intensities | 10.36  | 3.94   | 16.78  | 2.83   | 39.22   | 5.33    |
| reduc. mass | 0.81   | 1.99   | 0.26   | 0.43   | 0.25    | 0.27    |

force const 0.39 1.02 0.14 0.25 0.15 0.16

vibration # 49 50 51 52 53 54

-----

frequencies 1025.78 1031.44 1046.98 1064.28 1087.75 1095.59

intensities 10.79 26.37 13.70 73.68 76.82 30.06

reduc. mass 0.27 0.41 0.36 0.42 0.52 0.49

force const 0.17 0.26 0.23 0.28 0.36 0.35

vibration # 55 56 57 58 59 60

-----

frequencies 1105.60 1110.35 1142.24 1170.75 1184.73 1214.75

intensities 17.19 15.67 11.53 43.41 8.03 75.29

reduc. mass 0.52 0.68 0.34 1.34 0.74 0.43

force const 0.38 0.50 0.26 1.08 0.61 0.37

vibration # 61 62 63 64 65 66

-----

frequencies 1223.38 1232.88 1246.93 1261.05 1313.47 1316.43

intensities 35.13 13.32 111.04 1.17 110.51 9.58

reduc. mass 0.25 0.31 0.70 0.31 0.38 1.49

force const 0.22 0.28 0.64 0.29 0.38 1.52

vibration # 67 68 69 70 71 72

-----

frequencies 1339.83 1384.01 1390.50 1426.76 1447.28 1481.06

intensities 60.84 53.17 75.13 798.31 43.85 92.86

reduc. mass 1.02 0.57 0.48 0.73 0.50 1.10

force const 1.08 0.64 0.54 0.88 0.61 1.42

| vibration # | 73      | 74      | 75      | 76      | 77      | 78      |
|-------------|---------|---------|---------|---------|---------|---------|
| -----       |         |         |         |         |         |         |
| frequencies | 1494.54 | 1506.97 | 1510.33 | 1521.28 | 1532.20 | 1546.67 |
| intensities | 64.04   | 72.05   | 79.10   | 34.06   | 29.72   | 17.29   |
| reduc. mass | 0.71    | 0.96    | 0.66    | 1.90    | 0.78    | 0.79    |
| force const | 0.93    | 1.28    | 0.89    | 2.60    | 1.08    | 1.11    |

| vibration # | 79      | 80      | 81      | 82      | 83      | 84      |
|-------------|---------|---------|---------|---------|---------|---------|
| -----       |         |         |         |         |         |         |
| frequencies | 1565.78 | 1572.21 | 1577.61 | 1617.85 | 1627.31 | 1646.60 |
| intensities | 6.25    | 31.02   | 19.85   | 78.78   | 1.04    | 69.80   |
| reduc. mass | 0.94    | 0.75    | 0.62    | 0.40    | 0.85    | 0.44    |
| force const | 1.36    | 1.09    | 0.91    | 0.61    | 1.32    | 0.70    |

| vibration # | 85      | 86      | 87      | 88      | 89      | 90      |
|-------------|---------|---------|---------|---------|---------|---------|
| -----       |         |         |         |         |         |         |
| frequencies | 1651.52 | 1654.03 | 1657.29 | 1657.40 | 1660.21 | 1664.00 |
| intensities | 87.80   | 15.16   | 0.79    | 36.80   | 19.55   | 9.90    |
| reduc. mass | 0.32    | 0.30    | 0.21    | 0.24    | 0.33    | 0.24    |
| force const | 0.51    | 0.49    | 0.34    | 0.39    | 0.54    | 0.40    |

| vibration # | 91      | 92      | 93      | 94      | 95      | 96      |
|-------------|---------|---------|---------|---------|---------|---------|
| -----       |         |         |         |         |         |         |
| frequencies | 1669.37 | 1674.52 | 1679.51 | 1680.68 | 1706.77 | 1792.18 |
| intensities | 55.07   | 8.72    | 4.32    | 4.82    | 22.71   | 1254.21 |
| reduc. mass | 0.45    | 0.23    | 0.38    | 0.35    | 0.70    | 1.43    |
| force const | 0.73    | 0.38    | 0.63    | 0.58    | 1.21    | 2.70    |

|             |         |         |         |         |         |         |
|-------------|---------|---------|---------|---------|---------|---------|
| vibration # | 97      | 98      | 99      | 100     | 101     | 102     |
| -----       |         |         |         |         |         |         |
| frequencies | 1834.80 | 1890.47 | 3020.78 | 3025.02 | 3027.80 | 3050.04 |
| intensities | 292.91  | 24.97   | 275.90  | 569.81  | 688.92  | 456.05  |
| reduc. mass | 1.30    | 0.85    | 0.13    | 0.13    | 0.16    | 0.50    |
| force const | 2.58    | 1.79    | 0.70    | 0.68    | 0.85    | 2.75    |

|             |         |         |         |         |         |         |
|-------------|---------|---------|---------|---------|---------|---------|
| vibration # | 103     | 104     | 105     | 106     | 107     | 108     |
| -----       |         |         |         |         |         |         |
| frequencies | 3066.30 | 3072.92 | 3085.67 | 3100.91 | 3108.61 | 3121.69 |
| intensities | 243.39  | 351.44  | 354.94  | 342.03  | 240.16  | 339.73  |
| reduc. mass | 0.90    | 0.48    | 0.92    | 0.42    | 0.77    | 0.50    |
| force const | 5.00    | 2.67    | 5.14    | 2.36    | 4.37    | 2.90    |

|             |         |         |         |         |         |         |
|-------------|---------|---------|---------|---------|---------|---------|
| vibration # | 109     | 110     | 111     | 112     | 113     | 114     |
| -----       |         |         |         |         |         |         |
| frequencies | 3127.46 | 3132.40 | 3136.35 | 3137.50 | 3144.04 | 3146.15 |
| intensities | 406.17  | 416.27  | 637.32  | 127.14  | 405.85  | 580.42  |
| reduc. mass | 0.52    | 0.17    | 0.49    | 0.26    | 0.53    | 0.55    |
| force const | 3.02    | 0.98    | 2.82    | 1.52    | 3.11    | 3.21    |

|             |         |         |         |         |         |         |
|-------------|---------|---------|---------|---------|---------|---------|
| vibration # | 115     | 116     | 117     | 118     | 119     | 120     |
| -----       |         |         |         |         |         |         |
| frequencies | 3147.90 | 3153.82 | 3154.42 | 3204.18 | 3849.31 | 3855.42 |
| intensities | 337.94  | 509.74  | 115.75  | 376.95  | 61.55   | 21.63   |
| reduc. mass | 0.49    | 0.46    | 0.36    | 0.56    | 0.85    | 0.85    |
| force const | 2.85    | 2.70    | 2.13    | 3.41    | 7.44    | 7.46    |

Number of imaginary frequencies: 0
